# Supplementary material
Source: PubMed Central journal article supplement (PMC7644341)
Supplement: NIHMS1585264-supplement-Supporting_Info.pdf [file NIHMS1585264-supplement-Supporting_Info.pdf]

## Supporting Information

### **Bioreductively Activatable Prodrug Conjugates of Combretastatin A-1 and Combretastatin A-4 as Anticancer Agents Targeted Towards Tumor Hypoxia**

Blake A. Winn,<sup>†</sup> Laxman Devkota,<sup>†</sup> Bunnarack Kuch,<sup>†</sup> Matthew T. MacDonough,<sup>†</sup> Tracy E. Strecker,<sup>†</sup> Yifan Wang,<sup>†</sup> Zhe Shi,<sup>†</sup> Jeni L. Gerberich,<sup>‡</sup> Deboprosad Mondal,<sup>†</sup> Alejandro J. Ramirez,<sup>§</sup> Ernest Hamel,<sup>^</sup> David J. Chaplin,<sup>†,¶</sup> Peter Davis,<sup>¶</sup> Ralph P. Mason,<sup>‡</sup> Mary Lynn Trawick,<sup>†\*</sup> Kevin G. Pinney<sup>†\*</sup>

<sup>†</sup>Department of Chemistry and Biochemistry, Baylor University, One Bear Place #97348, Waco, Texas 76798-7348, United States; <sup>§</sup>Mass Spectrometry Center, Baylor University, One Bear Place #97046, Waco, Texas 76798-7046, United States

<sup>‡</sup>Predictive Imaging Research Laboratory, Department of Radiology, The University of Texas Southwestern Medical Center, 5323 Harry Hines Boulevard, Dallas, TX 75390-9058, United States

<sup>^</sup>Screening Technologies Branch, Developmental Therapeutics Program, Division of Cancer Treatment and Diagnosis, National Cancer Institute, Frederick National Laboratory for Cancer Research, National Institutes of Health, Frederick, MD 21702, United States

<sup>¶</sup>Fast Biopharma Ltd., 10 Aston Park, Aston Rowant, OX49 5SW, United Kingdom

#### **\*Corresponding Authors:**

Kevin G. Pinney

\*Tel: (254) 710-4117. Fax: (254) 710-4272. E-mail: [Kevin\\_Pinney@baylor.edu](mailto:Kevin_Pinney@baylor.edu)

Mary Lynn Trawick

\*Tel: (254) 710-6857. Fax: (254) 710-4272. E-mail: [Mary\\_Lynn\\_Trawick@baylor.edu](mailto:Mary_Lynn_Trawick@baylor.edu)

## Table of Contents

| <b><u>Content</u></b>                                           | <b><u>Page Number</u></b> |
|-----------------------------------------------------------------|---------------------------|
| Figures and Schemes (includes Figures S1 – S3, Schemes S1 – S2) | S4-7                      |
| Solubilization Vehicles for in vivo Studies                     | S8                        |
| Synthesis of Bioreductive Triggers                              | S9-12                     |
| References in Supporting Information                            | S12-13                    |
| NMR, HPLC, HRMS, X-Ray Data:                                    |                           |
| Compound 2                                                      | S14-15                    |
| Compound 3                                                      | S16-17                    |
| Compound 4                                                      | S18-19                    |
| Compound 5                                                      | S20-21                    |
| Compound 6                                                      | S22-23                    |
| Compound 7                                                      | S24-25                    |
| Compound 10                                                     | S26-27                    |
| Compound 11                                                     | S28-29                    |
| Compound 12                                                     | S30-31                    |
| Compound 13                                                     | S32-33                    |
| Compound 15                                                     | S34-35                    |
| Compound 16                                                     | S36-37                    |
| Compound 17                                                     | S38-39                    |
| Compound 19                                                     | S40-41                    |
| Compound 20                                                     | S42-43                    |
| Compound 21                                                     | S44-51                    |
| Compound 22                                                     | S52-59                    |
| Compound 23                                                     | S60-65                    |
| Compound 24                                                     | S66-73                    |
| Compound 25                                                     | S74-79                    |
| Compound 26                                                     | S80-85                    |

|                                                                                               |          |
|-----------------------------------------------------------------------------------------------|----------|
| Compound <b>27/28</b>                                                                         | S86-87   |
| Compound <b>29</b>                                                                            | S88-95   |
| Compound <b>30</b>                                                                            | S96-97   |
| Compound <b>31</b>                                                                            | S98-99   |
| Compound <b>33</b>                                                                            | S100-101 |
| Compound <b>34</b>                                                                            | S102-103 |
| Compound <b>35</b>                                                                            | S104-112 |
| Compound <b>36</b>                                                                            | S113-120 |
| Compound <b>37</b>                                                                            | S121-127 |
| Compound <b>38</b>                                                                            | S128-135 |
| Compound <b>39</b>                                                                            | S136-141 |
| Compound <b>40</b>                                                                            | S142-147 |
| Compound <b>41</b>                                                                            | S148-154 |
| Compound <b>43</b>                                                                            | S155-162 |
| Compound <b>44</b>                                                                            | S163-168 |
| Compound <b>45</b> (includes Tables S1 – S4)                                                  | S169-184 |
| HPLC Chromatograms for Enzymatic Cleavage Assay                                               | S185-208 |
| NOE Spectra of compounds <b>37</b> , <b>38</b> and <b>41</b>                                  | S209-213 |
| Preliminary Pharmacokinetic (PK) Study (includes Figures S4 – S8, Tables S5 – S6)             | S214-219 |
| Hypoxia Cytotoxicity Ratio (HCR) Determined in A549 Lung Cancer Cell Line (includes Table S7) | S220     |
| Additional Histology Related to BAPC <b>45</b> (includes Figures S9 – S10)                    | S221-223 |

## Figures and Schemes

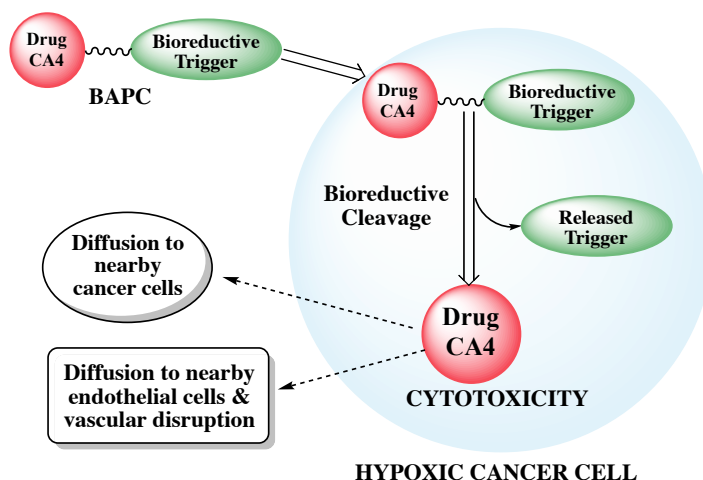

**Figure S1.** Selective release of cytotoxic agent (CA4) from non-toxic BAPC under tumor hypoxia. BAPCs are designed to activate selectively in the hypoxic tumor microenvironment, thereby releasing their cytotoxic anticancer agent (payload).<sup>S1</sup>

The disorganized, leaky tumor-associated capillaries with shunts and blind ends lead to diminished blood flow in the central mass of the tumor and an increased average diffusion distance for oxygen and nutrients to reach tumor cells.<sup>S2</sup> Furthermore, there is a distinct oxygen concentration gradient present in a significant percentage of solid tumors, varying from normoxic to hypoxic to anoxic.<sup>S3</sup> Tumor-associated hypoxia is believed to be one of the significant contributing factors to treatment failure and relapse of solid tumors in cancer patients, as the tumor cells in the hypoxic region have been implicated in resistance.<sup>S3–S6</sup>

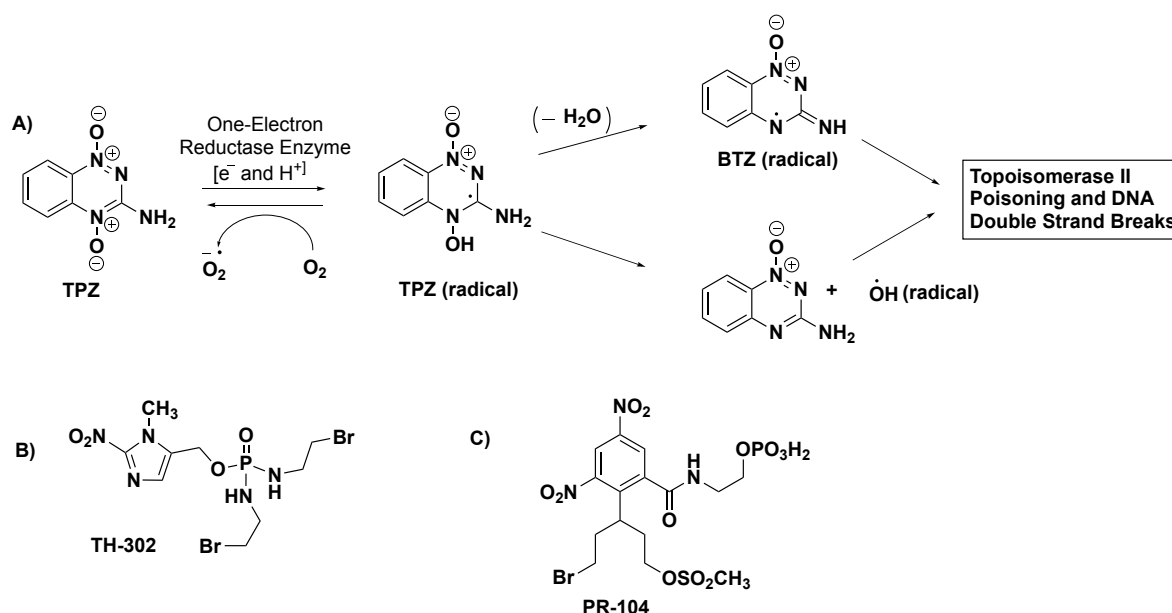

**Figure S2.** A) Mechanism of action for tirapazamine with hypoxic cells; B) Structure of TH-302; C) Structure of PR-104.<sup>S7–S10</sup>

Tirapazamine represents one type of hypoxia-selective therapeutic agent. Reduction of its triazine moiety to a free radical leads to DNA damage and poisoning of topoisomerase II (Figure S2, A).<sup>S7,S8</sup> While Phase I and Phase II clinical trials for tirapazamine had positive results, a Phase III clinical trial utilizing the combination of tirapazamine with the conventional anticancer agent cisplatin to treat advanced non-small cell lung cancer was unsuccessful,<sup>S3</sup> due largely to dose-limiting toxicity.<sup>S11,S12</sup> The high degree of hypoxia-selective activation coupled with its performance in early clinical trials resulted in tirapazamine being viewed as a promising positive control against which new hypoxia-selective therapeutic agents are often compared.<sup>S2</sup> TH-302 (evofosfamide),<sup>S13,S14</sup> a 2-nitroimidazole-based nitrogen mustard prodrug (Figure S2, B) that releases its parent drug bromoisophosphoramidate mustard under hypoxic conditions, advanced to Phase III human clinical trials.<sup>S9,S15</sup> Unlike the Phase I and II studies, the results of the Phase III clinical trials showed no statistical significance for TH-302 against pancreatic adenocarcinoma and soft tissue sarcoma.<sup>S16–S19</sup> PR-104 (Figure S2, C) is a phosphate ester pre-prodrug which

contains a nitrogen mustard moiety that becomes active and induces DNA cross-linking under hypoxic conditions.<sup>S2,S10,S20</sup> Nitroreduction can act as an electronic switch to activate a reactive center, as in the case of the reduction of the PR-104 alcohol to form the cytotoxic hydroxylamine (or amine), or initiate fragmentation from the radical anion or hydroxylamine to release the trigger and generate the (non-radical) parent cytotoxin, the nitrogen mustard in the case of TH-302.<sup>S9,S21,S22</sup>

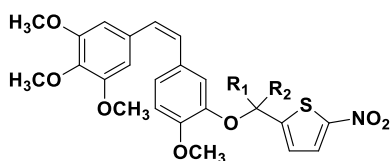

Normethyl;  $R_1=R_2=H$   
 Monomethyl;  $R_1=H, R_2=CH_3$   
 Gem-dimethyl;  $R_1=R_2=CH_3$

**Figure S3.** Combretastatin A-4 (CA4) incorporating nitrothiophene-based bio-reductive triggers.<sup>S23</sup>

**A) Previously Established Synthetic Route**

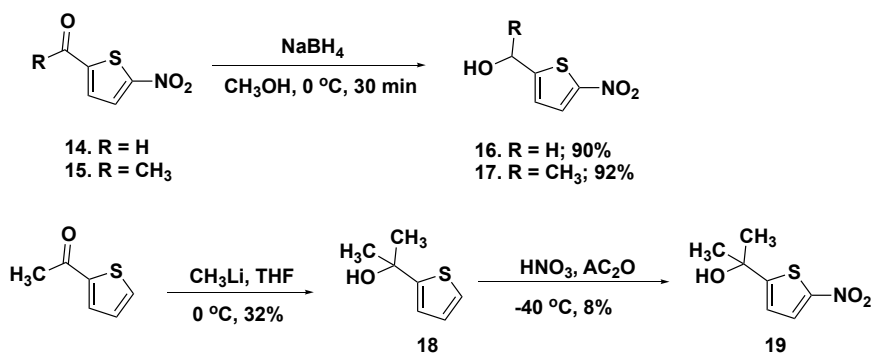

**B) Modified Synthetic Route**

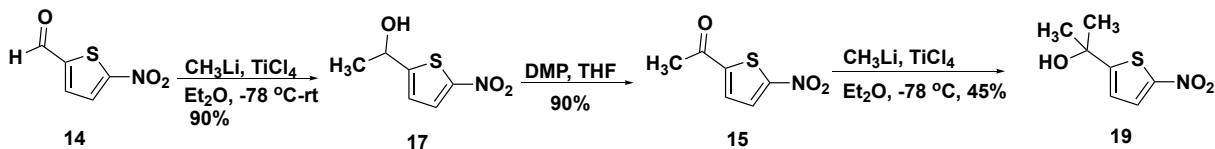

**Scheme S1.** Synthesis of nitrothiophene triggers: A) Previously established synthetic route (by Davis and co-workers);<sup>S23</sup> B) Modified synthetic route.<sup>S24, S25</sup>

The synthetic route reported by Davis and co-workers was utilized in the synthesis of the *nor*- and *mono*-methyl nitrothiophene triggers **16** and **17**, which involved reduction of aldehyde **14** and ketone **15**, respectively (Scheme S1).<sup>S23</sup> However, in our hands, the synthesis of the *gem*-dimethyl nitrothiophene trigger **19** (Scheme S1) suffered from two consecutive low-yielding steps, which included methylation of the carbonyl group followed by nitration at the C5 position. In order to obtain a sufficient quantity of compound **19**, it proved efficacious to develop a modified synthetic route that provided all three triggers (*nor*-, *mono*- and *gem*-) from a single starting material (aldehyde **14**).<sup>S1, S25</sup> Methylation of aldehyde **14** furnished *mono*-methyl trigger **17**, which, upon subsequent oxidation and methylation, yielded *gem*-dimethyl trigger **19** in good yield (Scheme S1).

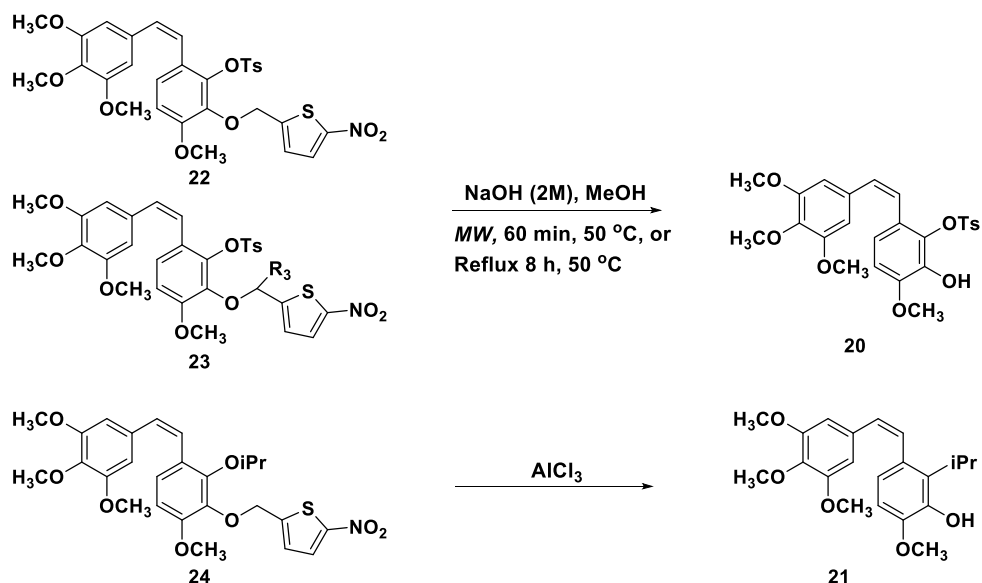

Scheme S2. Attempted Deprotection of Compounds **22**, **23** and **24**

## Solubilization Vehicles for in vivo Studies

Since BAPC **45** was insoluble in buffered saline or water, it was necessary to develop a suitable vehicle to solubilize this agent for in vivo use. While BAPC **45** proved soluble in DMSO, there are limits (in terms of volume tolerability) associated with using DMSO alone in mice. A solubilization study identified several potential vehicles [including: 90% DMSO / 10% PBS; 33.3% DMSO / 66.7% sesame oil; 50% DMSO / 50% Tween 80; 12% DMSO / 12% Tween 80 / 71% PEG 400 / 5% PBS; 11% DMSO / 11% Tween 80 / 67% PEG 400 / 11% ethanol; and 10% DMSO / 55% sesame oil / 35% PEG 400 (referred to as DSP)] from which the latter was chosen for in vivo studies based on its improved ability to solubilize BAPC **45**.

## Synthesis of Bioreductive Triggers

Synthesis of Compounds **16**, **17** and **19** Using the Previously Established Synthetic Route (Davis' Route)<sup>S23</sup>

**(5-Nitrothiophen-2-yl)methanol (16)**<sup>S23</sup>. This bioreductive trigger was prepared following the synthetic protocol reported by Pinney and Co-workers.<sup>S25</sup> <sup>1</sup>H NMR (500 MHz, CDCl<sub>3</sub>) δ 7.84 (1H, d, *J* = 4 Hz, ArH), 6.96 (1H, d, *J* = 4 Hz, ArH), 4.91 (2H, d, *J* = 5.5, CH<sub>2</sub>), 2.20 (1H, s, OH); <sup>13</sup>C NMR (126 MHz, CDCl<sub>3</sub>) δ 153.4, 150.9, 128.9, 123.6, 60.4.

**1-(5-Nitrothiophen-2-yl)ethan-1-ol (17)**<sup>S23</sup>. 2-Acetyl-5-nitrothiophene (1.00 g, 5.85 mmol) was dissolved in dry methanol (20 mL) in an ice bath (0 °C). NaBH<sub>4</sub> (0.259 g, 6.71 mmol) was added, and the reaction mixture was stirred for 2 h. Ice was added to the reaction mixture, and it was acidified to neutral pH with 3 M HCl. The solution was then extracted with EtOAc, and the organic phase was dried with Na<sub>2</sub>SO<sub>4</sub> and evaporated under reduced pressure. Flash chromatography of the crude product using a prepacked 50 g silica column [eluents: solvent A, EtOAc; solvent B, hexanes; gradient, 10% A/90% B over 1.19 min (1 CV), 10% A/90% B → 64% A/36% B over 13.12 min (10 CV), 64% A/36% B over 2.38 min (2 CV); flow rate 50.0 mL/min; monitored at 254 and 280 nm] yielded mono methyl trigger **17** (0.932 g, 5.38 mmol, 92%) as a brown oil: <sup>1</sup>H NMR (500 MHz, CDCl<sub>3</sub>) δ 7.81 (1H, d, *J* = 4 Hz, , ArH), 6.90 (1H, d, *J* = 4 Hz, , ArH), 5.15 (1H, dq, *J* = 6 Hz, *J* = 5 Hz, CH), 2.23 (1H, d, *J* = 5 Hz, OH), 1.63 (3H, d, *J* = 6 Hz, CH<sub>3</sub>); <sup>13</sup>C NMR (125 MHz, CDCl<sub>3</sub>) δ 160.0, 149.9, 129.1, 122.2, 66.3, 25.1.

**2-(Thiophen-2-yl)propan-2-ol (18)**<sup>S23</sup>. 2-Acetylthiophene (10.0 g, 79.2 mmol) was dissolved in dry THF (100 mL) in an ice bath (0 °C). CH<sub>3</sub>Li (64 mL, 103 mmol, 1.6 M) was added dropwise, and the reaction mixture was stirred for 18 h. The reaction was quenched with water, and volatile

components were evaporated under reduced pressure. The reaction mixture was then extracted with EtOAc, and the organic phase was dried with Na<sub>2</sub>SO<sub>4</sub> and evaporated under reduced pressure. Flash chromatography of the crude product using a prepacked 100 g silica column [eluent: solvent A, EtOAc; solvent B, hexanes; gradient, 12% A/88% B over 1.19 min (1 CV), 12% A/88% B → 100% A/0% B over 13.12 min (10 CV), 100% A/0% B over 2.38 min (2 CV); flow rate 50.0 mL/min; monitored at 254 and 280 nm] yielded 2-(thiophen-2-yl)propan-2-ol (**18**) (3.60 g, 25.3 mmol 32%) as a yellow oil: <sup>1</sup>H NMR (500 MHz, CDCl<sub>3</sub>) δ 7.20 (1H, dd, *J* = 5 Hz, *J* = 1.5 Hz, ArH), 6.97 (2H, m, ArH), 2.04 (1H, s, OH), 1.68 (6H, s, CH<sub>3</sub>).

**2-(5-Nitrothiophen-2-yl)propan-2-ol (19)**<sup>S23</sup>. The tertiary alcohol **18** (6.22 g, 4.37 mmol) was dissolved in Ac<sub>2</sub>O (67 mL) and cooled to -78 °C. Fuming HNO<sub>3</sub> (25 mL) was added dropwise, and the reaction mixture was stirred for 2 h while allowing the reaction mixture to warm to -15° C. Ice (200 g) was added to the solution, which was stirred for 40 min. The reaction mixture was extracted with EtOAc (3×75 mL), and the organic phase was washed repeatedly with brine, water and saturated sodium bicarbonate, dried over Na<sub>2</sub>SO<sub>4</sub>, filtered and concentrated under reduced pressure. The crude product was purified using flash column chromatography affording the alcohol product **19** (0.655 g, 0.35 mmol, 8%) as an orange wax: <sup>1</sup>H NMR (CDCl<sub>3</sub>, 600 MHz) δ 7.79 (1H, d, *J* = 4.2 Hz, ArH), 6.87 (1H, d, *J* = 4.2 Hz, ArH), 2.13 (1H, s, OH), 1.67 (6H, s, CH<sub>3</sub>); <sup>13</sup>C NMR (151 MHz, CDCl<sub>3</sub>) δ 163.6, 133.9, 128.9, 121.4, 72.0, 32.2.

Synthesis of Compounds **15**, **17** and **19** Using the Modified Synthetic Route (Titanium Tetrachloride Route)<sup>S24, S25</sup>

**1-(5-Nitrothiophen-2-yl)ethan-1-ol (17)**.<sup>S24, S25</sup> This bioreductive trigger was prepared following the synthetic protocol reported by Pinney and Co-workers.<sup>S25</sup> <sup>1</sup>H NMR (500 MHz,

CDCl<sub>3</sub>)  $\delta$  7.81 (1H, d,  $J$  = 4 Hz, ArH), 6.90 (1H, d,  $J$  = 4 Hz, ArH), 5.15 (1H, dq,  $J$  = 6 Hz,  $J$  = 5 Hz, CH), 2.23 (1H, d,  $J$  = 5 Hz, OH), 1.63 (3H, d,  $J$  = 6 Hz, CH<sub>3</sub>); <sup>13</sup>C NMR (125 MHz, CDCl<sub>3</sub>)  $\delta$  160.0, 149.9, 129.1, 122.2, 66.3, 25.1.

**1-(5-Nitrothiophen-2-yl)ethan-1-one (15).** This bioreductive trigger was prepared following the synthetic protocol reported by Pinney and Co-workers.<sup>S25</sup> <sup>1</sup>H NMR (600 MHz, CDCl<sub>3</sub>)  $\delta$  7.89 (1H, d,  $J$  = 4.3 Hz, ArH), 7.58 (1H, d,  $J$  = 4.3 Hz, ArH), 2.60 (3H, s, CH<sub>3</sub>); <sup>13</sup>C NMR (151 MHz, CDCl<sub>3</sub>)  $\delta$  190.5, 156.5, 148.2, 130.2, 128.4, 26.6.

**2-(5-Nitrothiophen-2-yl)propan-2-ol (19).** <sup>S24, S25</sup> This bioreductive trigger was prepared following the synthetic protocol reported by Pinney and Co-workers.<sup>S25</sup> <sup>1</sup>H NMR (CDCl<sub>3</sub>, 600 MHz)  $\delta$  7.79 (1H, d,  $J$  = 4.2 Hz, ArH), 6.87 (1H, d,  $J$  = 4.2 Hz, ArH), 2.13 (1H, s, OH), 1.67 (3H, s, CH<sub>3</sub>), <sup>13</sup>C NMR (151 MHz, CDCl<sub>3</sub>)  $\delta$  163.6, 133.9, 128.9, 121.4, 72.0, 32.2.

## References in Supporting Information

- (S1) Pinney, K. G.; Trawick, M. L.; Mason, R. P.; Liu, L.; Chaplin, D. J.; Winn, B. A.; Devkota, L.; Strecker, T. E.; Gerberich, J.; Winters, A.; Wang, Y.; MacDonough, M. T. Abstract No. 3203, American Association for Cancer Research (AACR) Annual Meeting, Washington, DC, April 1-5, 2017. Poster presented on Tuesday April 4, 2017.
- (S2) Wilson, W. R.; Hay, M. P. *Nat. Rev. Cancer* **2011**, *11*, 393–410.
- (S3) Siemann, D. W.; Horsman, M. R. *Pharmacol. Ther.* **2015**, *153*, 107–124.
- (S4) Chaplin, D. J.; Olive, P. L.; Durand, R. E. *Cancer Res.* **1987**, *47*, 597–601
- (S5) Brown, J. M. *Br. J. Radiol.* **1979**, *52*, 650–656.
- (S6) Brown, J. M. In *Methods in Enzymology; Oxygen Biology and Hypoxia*; Academic Press, 2007; Vol. 435, pp 295–321.
- (S7) Zeman, E. M.; Brown, J. M.; Lemmon, M. J.; Hirst, V. K.; Lee, W. W. *Int. J. Radiat. Oncol.* **1986**, *12*, 1239–1242.
- (S8) Ahn, G.-O.; Brown, M. *Front. Biosci.* **2007**, *12*, 3483–3501.
- (S9) Meng, F.; Evans, J. W.; Bhupathi, D.; Banica, M.; Lan, L.; Lorente, G.; Duan, J.-X.; Cai, X.; Mowday, A. M.; Guise, C. P.; Maroz, A.; Anderson, R. F.; Patterson, A. V.; Stachelek, G. C.; Glazer, P. M.; Matteucci, M. D.; Hart, C. P. *Mol. Cancer Ther.* **2012**, *11*, 740–751.
- (S10) Konopleva, M.; Thall, P. F.; Yi, C. A.; Borthakur, G.; Covelev, A.; Bueso-Ramos, C.; Benito, J.; Konoplev, S.; Gu, Y.; Ravandi, F.; Jabbour, E.; Faderl, S.; Thomas, D.; Cortes, J.; Kadia, T.; Kornblau, S.; Daver, N.; Pemmaraju, N.; Nguyen, H. Q.; Feliu, J.; Lu, H.; Wei, C.; Wilson, W. R.; Melink, T. J.; Gutheil, J. C.; Andreeff, M.; Estey, E. H.; Kantarjian, H. *Haematologica* **2015**, *100*, 927–934.
- (S11) von Pawel, J.; von Roemeling, R.; Gatzemeier, U.; Boyer, M.; Elisson, L. O.; Clark, P.; Talbot, D.; Rey, A.; Butler, T. W.; Hirsh, V.; Olver, I.; Bergman, B.; Ayoub, J.; Richardson, G.; Dunlop, D.; Arcenas, A.; Vescio, R.; Viallet, J.; Treat, J. *J. Clin. Oncol.* **2000**, *18*, 1351–1359.
- (S12) Williamson, S. K.; Crowley, J. J.; Lara, P. N.; McCoy, J.; Lau, D. H. M.; Tucker, R. W.; Mills, G. M.; Gandara, D. R.; Southwest Oncology Group Trial S0003. *J. Clin. Oncol.* **2005**, *23*, 9097–9104.
- (S13) Duan, J.-X.; Jiao, H.; Kaizerman, J.; Stanton, T.; Evans, J. W.; Lan, L.; Lorente, G.; Banica, M.; Jung, D.; Wang, J.; Ma, H.; Li, X.; Yang, Z.; Hoffman, R. M.; Ammons, W. S.; Hart, C. P.; Matteucci, M. *J. Med. Chem.* **2008**, *51*, 2412–2420.
- (S14) Laubach, J. P.; Liu, C.-J.; Raje, N. S.; Yee, A. J.; Armand, P.; Schlossman, R. L.; Rosenblatt, J.; Hedlund, J.; Martin, M.; Reynolds, C.; Shain, K. H.; Zackon, I.; Stampleman, L.; Henrick, P.; Rivotto, B.; Hornburg, K. T. V.; Dumke, H. J.; Chuma, S.; Savell, A.; Handisides, D. R.; Kroll, S.; Anderson, K. C.; Richardson, P. G.; Ghobrial, I. M. *Clin. Cancer Res.* **2019**, *25*, 478–486.
- (S15) Yoon, C.; Lee, H.-J.; Park, D. J.; Lee, Y.-J.; Tap, W. D.; Eisinger-Mathason, T. S. K.; Hart, C. P.; Choy, E.; Simon, M. C.; Yoon, S. S. *Br. J. Cancer* **2015**, *113*, 46–56.
- (S16) Clinical Trial Testing TH-302 in Combination With Gemcitabine in Previously Untreated Subjects With Metastatic or Locally Advanced Unresectable Pancreatic Adenocarcinoma - Full Text View - ClinicalTrials.gov <https://clinicaltrials.gov/ct2/show/NCT01746979> (accessed May 30, 2018).

- (S17) A Phase 2 Biomarker - Enriched Study of TH-302 in Subjects With Advanced Melanoma - Full Text View - ClinicalTrials.gov <https://clinicaltrials.gov/ct2/show/NCT01864538> (accessed Aug 16, 2018).
- (S18) A Trial of TH-302 in Combination With Doxorubicin Versus Doxorubicin Alone to Treat Patients With Locally Advanced Unresectable or Metastatic Soft Tissue Sarcoma - Full Text View - ClinicalTrials.gov <https://clinicaltrials.gov/ct2/show/NCT01440088> (accessed Aug 16, 2018).
- (S19) Immunotherapy Study of Evofosfamide in Combination With Ipilimumab - Full Text View - ClinicalTrials.gov <https://clinicaltrials.gov/ct2/show/NCT03098160> (accessed Jul 10, 2019).
- (S20) Gu, Y.; Patterson, A. V.; Atwell, G. J.; Chernikova, S. B.; Brown, J. M.; Thompson, L. H.; Wilson, W. R. *Mol. Cancer Ther.* **2009**, *8*, 1714–1723.
- (S21) Hong, C. R.; Wilson, W. R.; Hicks, K. O. *Neoplasia* **2019**, *21*, 159–171.
- (S22) Anderson, R. F.; Li, D.; Hunter, F. W. *Free Radic. Biol. Med.* **2017**, *113*, 564–570.
- (S23) Thomson, P.; Naylor, M. A.; Everett, S. A.; Stratford, M. R. L.; Lewis, G.; Hill, S.; Patel, K. B.; Wardman, P.; Davis, P. D. *Mol. Cancer Ther.* **2006**, *5*, 2886–2894.
- (S24) Reetz, M. T.; Kyung, S. H.; Hüllmann, M. *Tetrahedron* **1986**, *42*, 2931–2935.
- (S25) Winn, B. A.; Shi, Z.; Carlson, G. J.; Wang, Y.; Nguyen, B. L.; Kelly, E. M.; Ross, R. D.; Hamel, E.; Chaplin, D. J.; Trawick, M. L.; Pinney, K. G. *Bioorg. Med. Chem. Lett.* **2017**, *27*, 636–641.
- (S26) Sriram, M.; Hall, J. J.; Grohmann, N. C.; Strecker, T. E.; Wootton, T.; Franken, A.; Trawick, M. L.; Pinney, K. G. *Bioorg. Med. Chem.* **2008**, *16*, 8161–8171.
- (S27) Yang, D. M.; Arai T. J.; Campbell J. W.; Gerberich J. L.; Zhou H.; Mason R. P. *NMR Biomed.* **2019**, *32*, e4101.

<sup>1</sup>H NMR (600 MHz, CDCl<sub>3</sub>) for Compound **2**

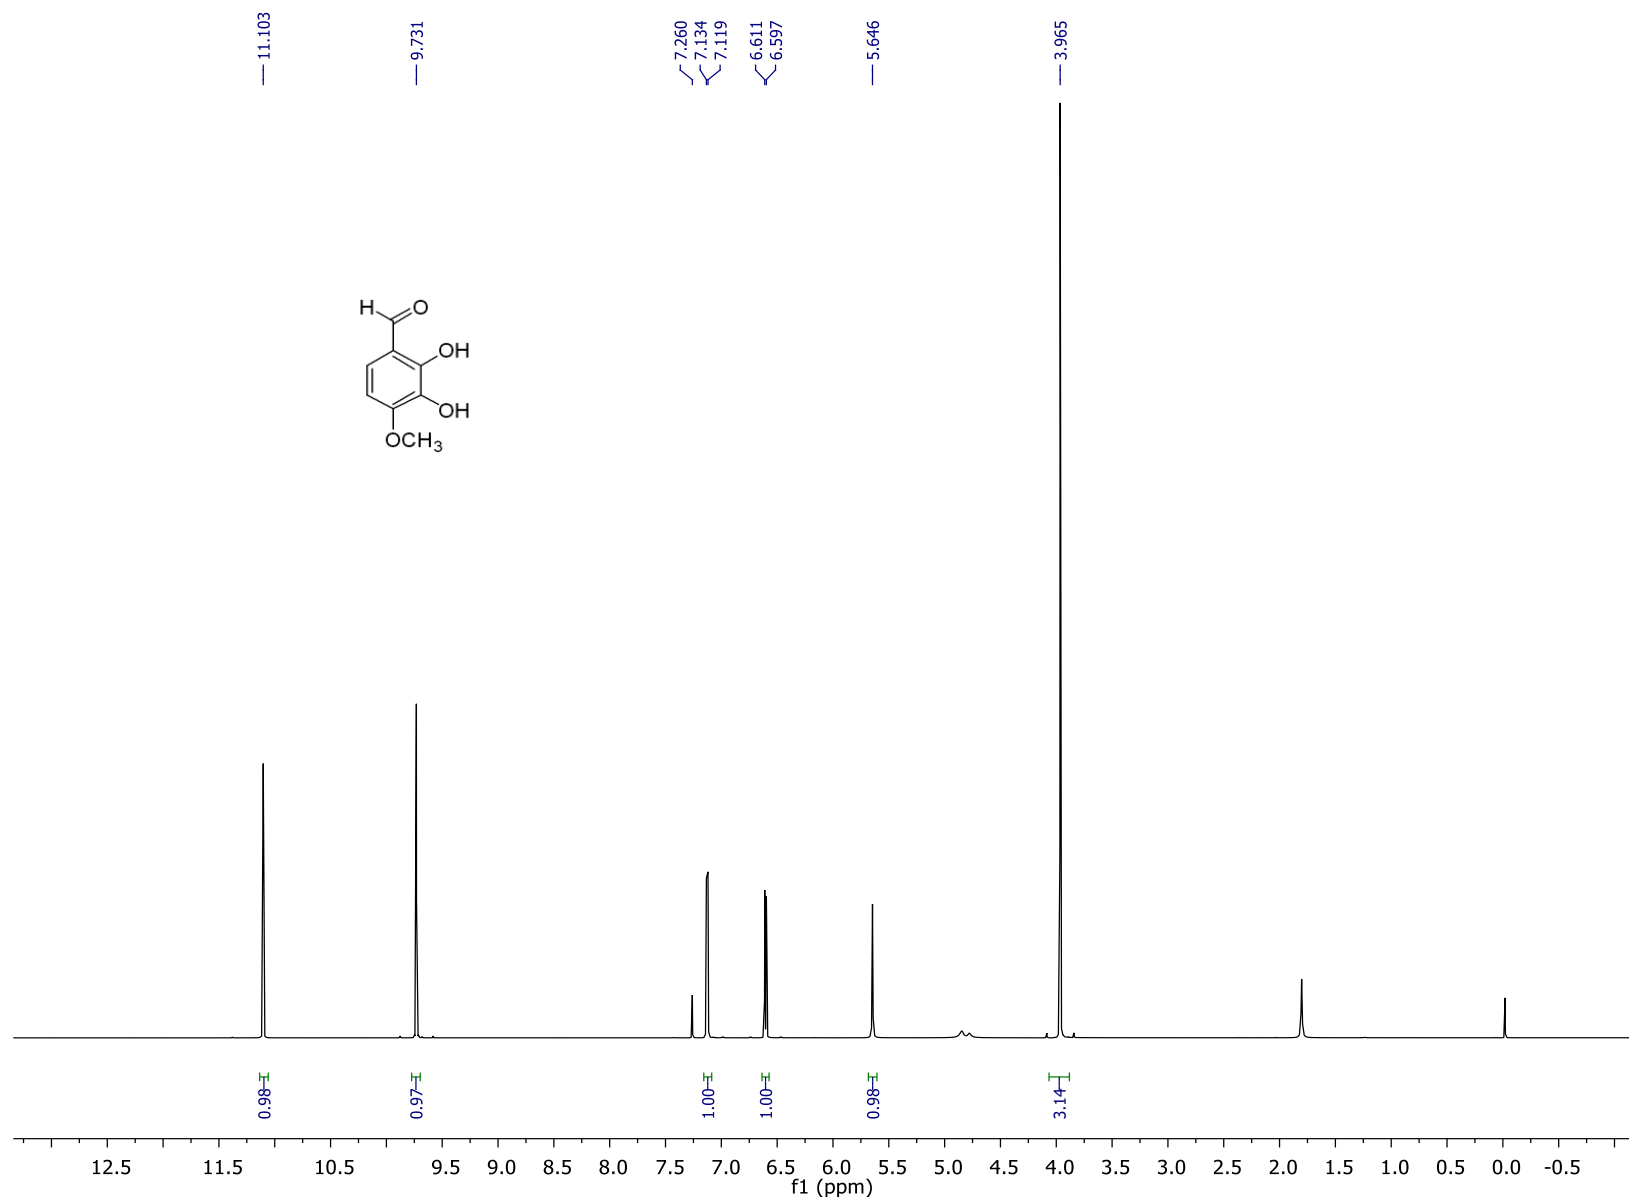

<sup>13</sup>C NMR (151 MHz, CDCl<sub>3</sub>) for Compound **2**

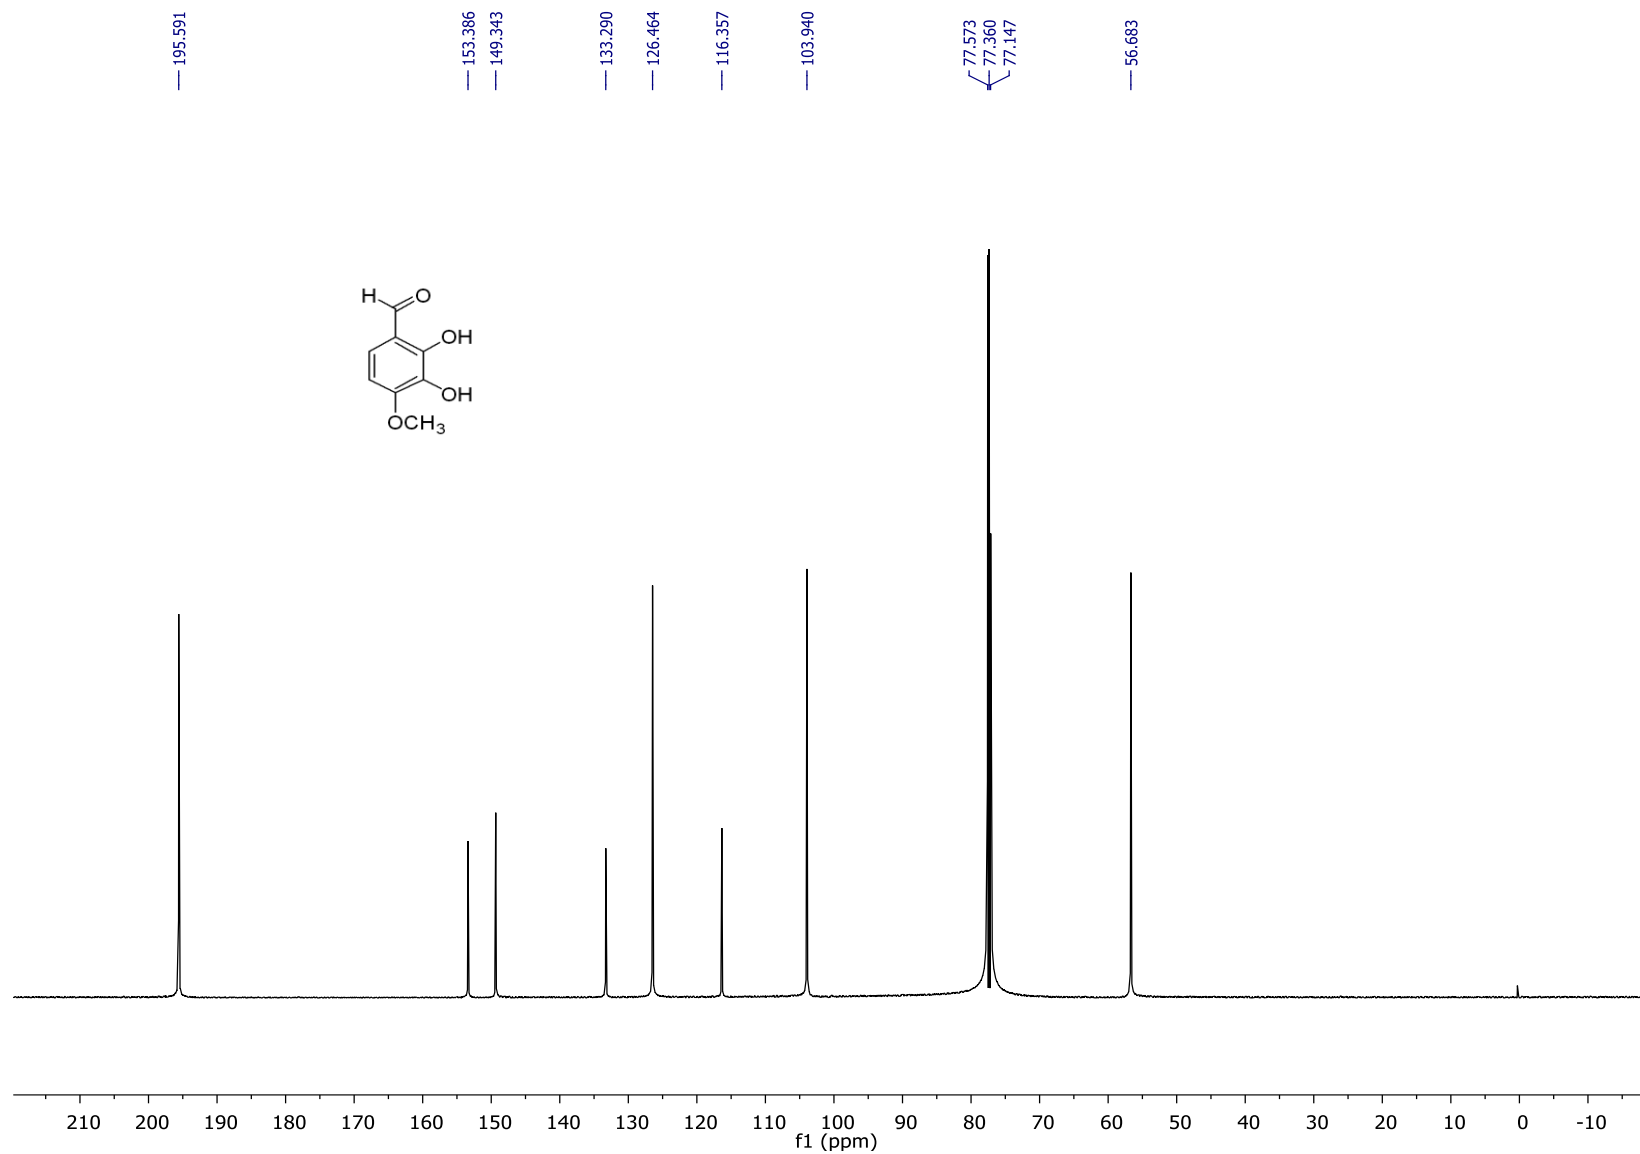

<sup>1</sup>H NMR (600 MHz, CDCl<sub>3</sub>) for Compound **3**

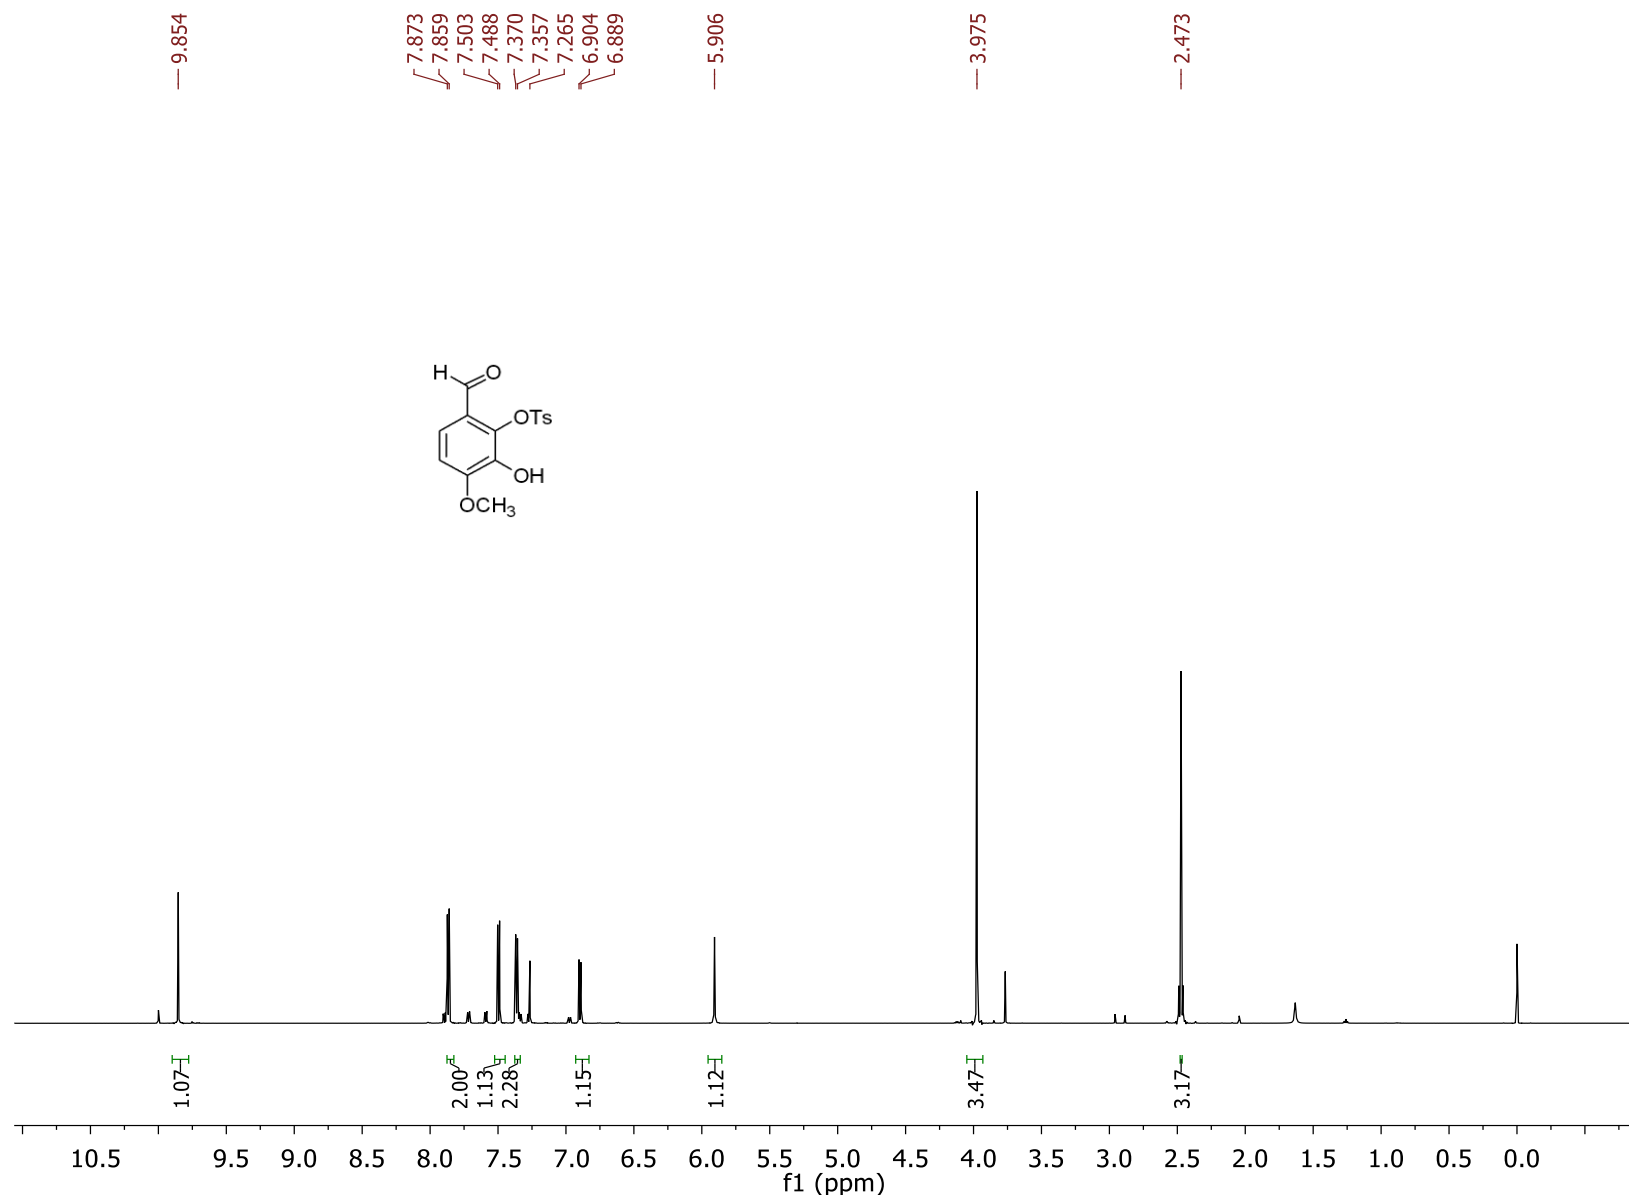

<sup>13</sup>C NMR (151 MHz, CDCl<sub>3</sub>) for Compound **3**

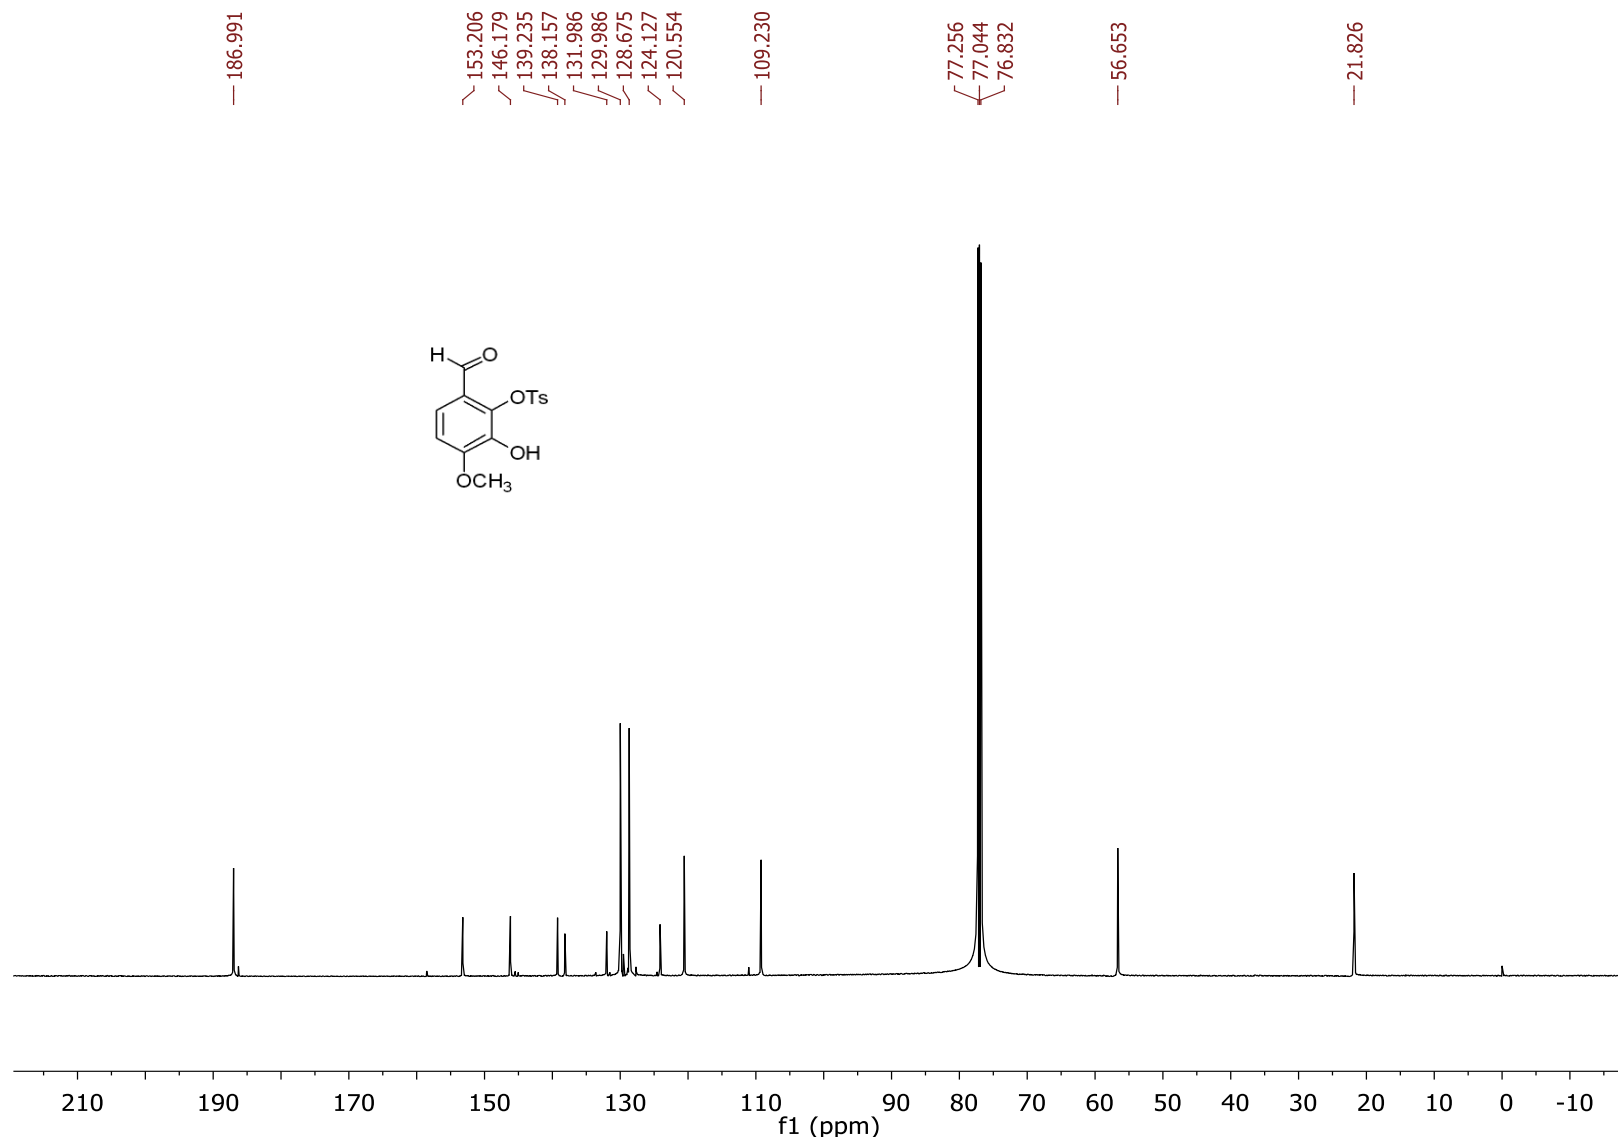

<sup>1</sup>H NMR (500 MHz, CDCl<sub>3</sub>) for Compound 4

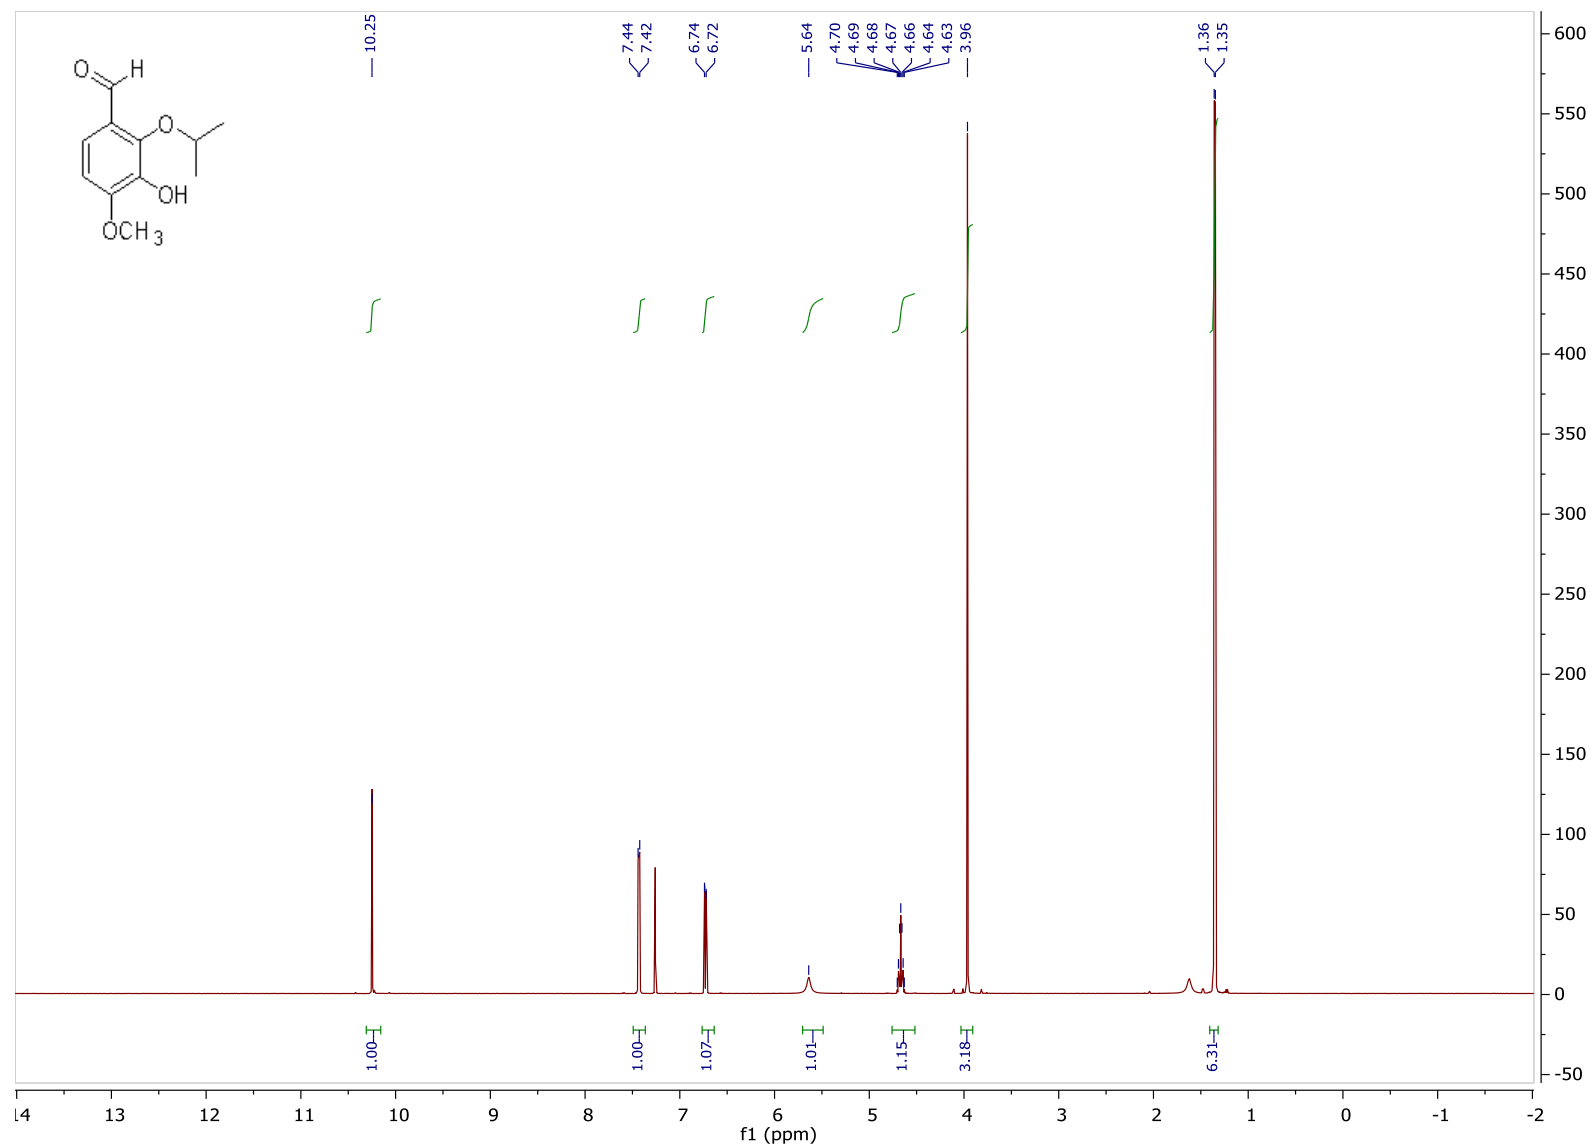

<sup>13</sup>C NMR (151 MHz, CDCl<sub>3</sub>) for Compound **4**

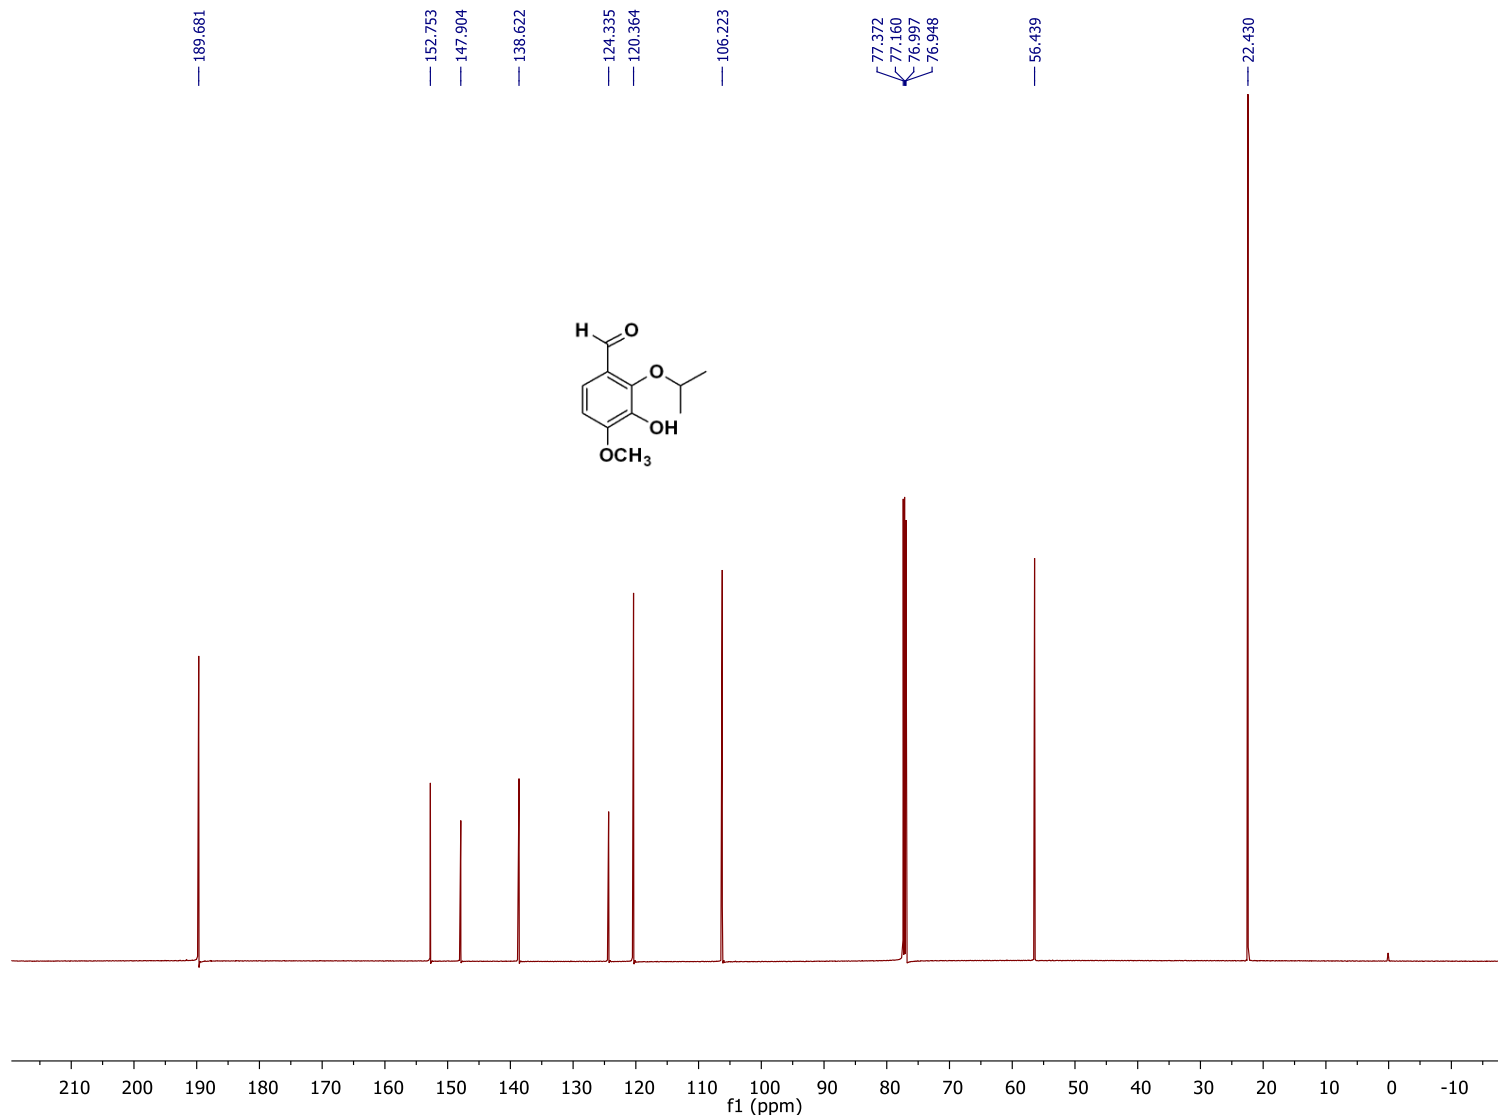

<sup>1</sup>H NMR (600 MHz, CDCl<sub>3</sub>) for Compound **5**

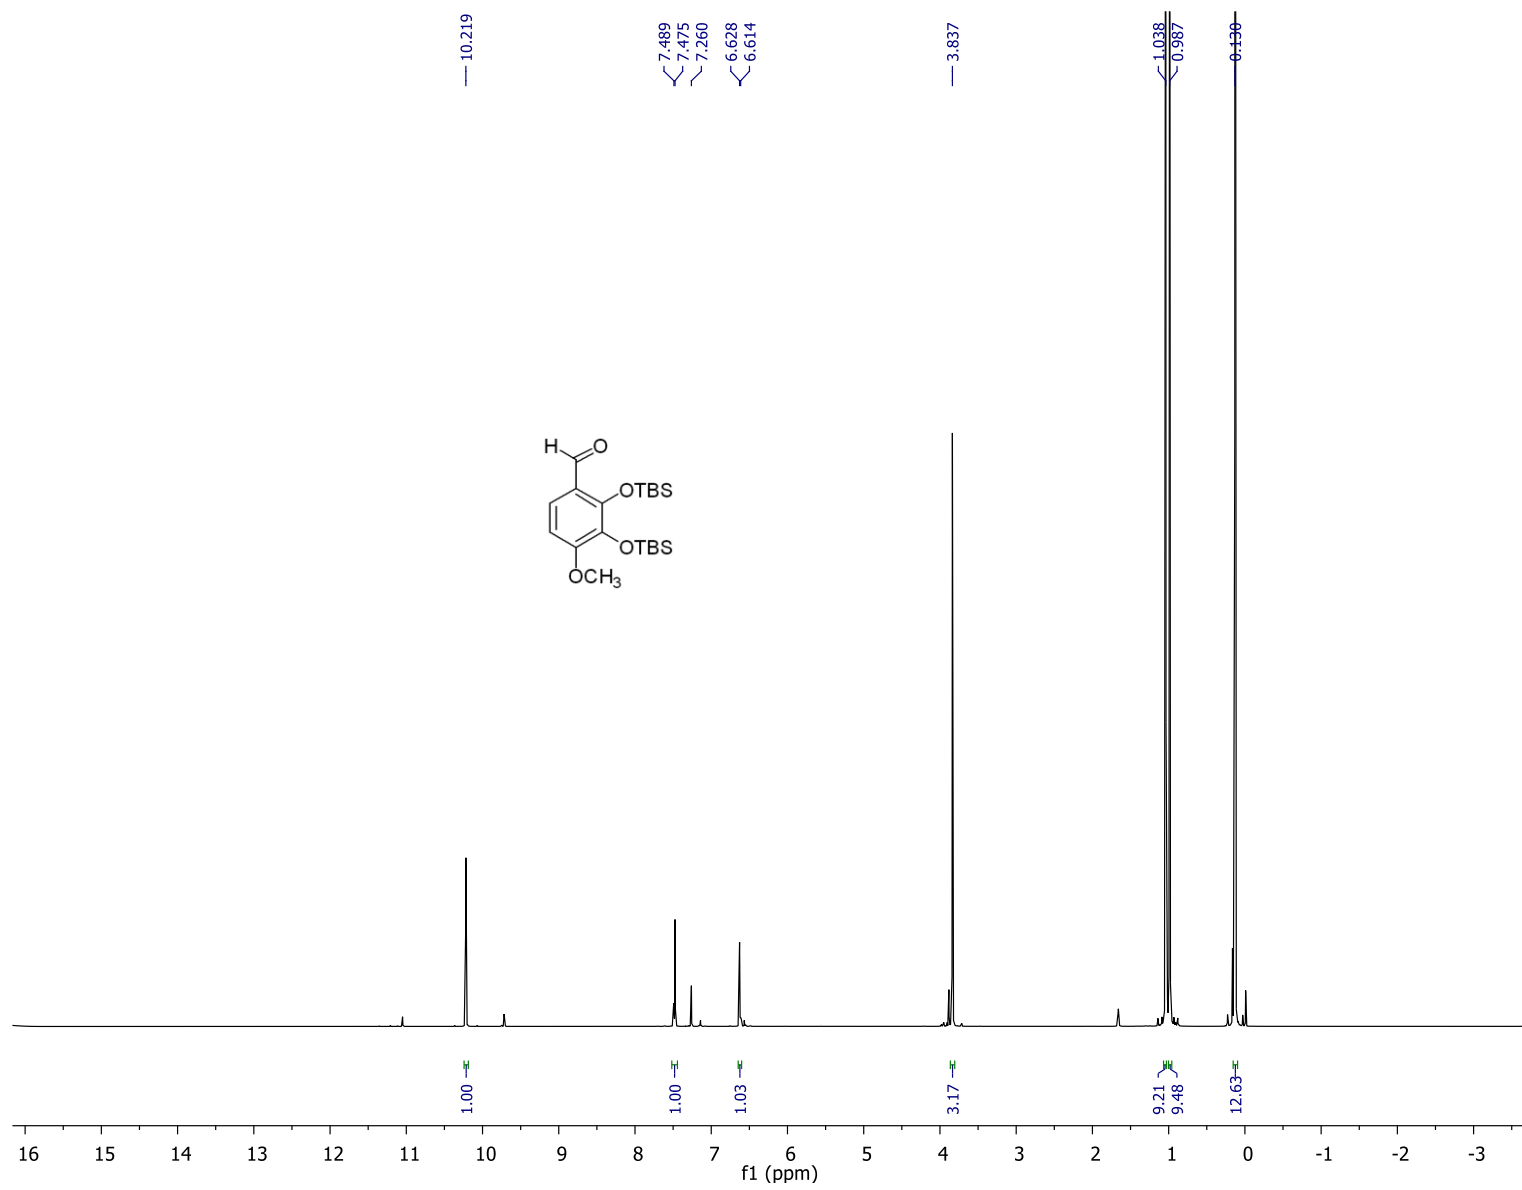

<sup>13</sup>C NMR (151 MHz, CDCl<sub>3</sub>) for Compound **5**

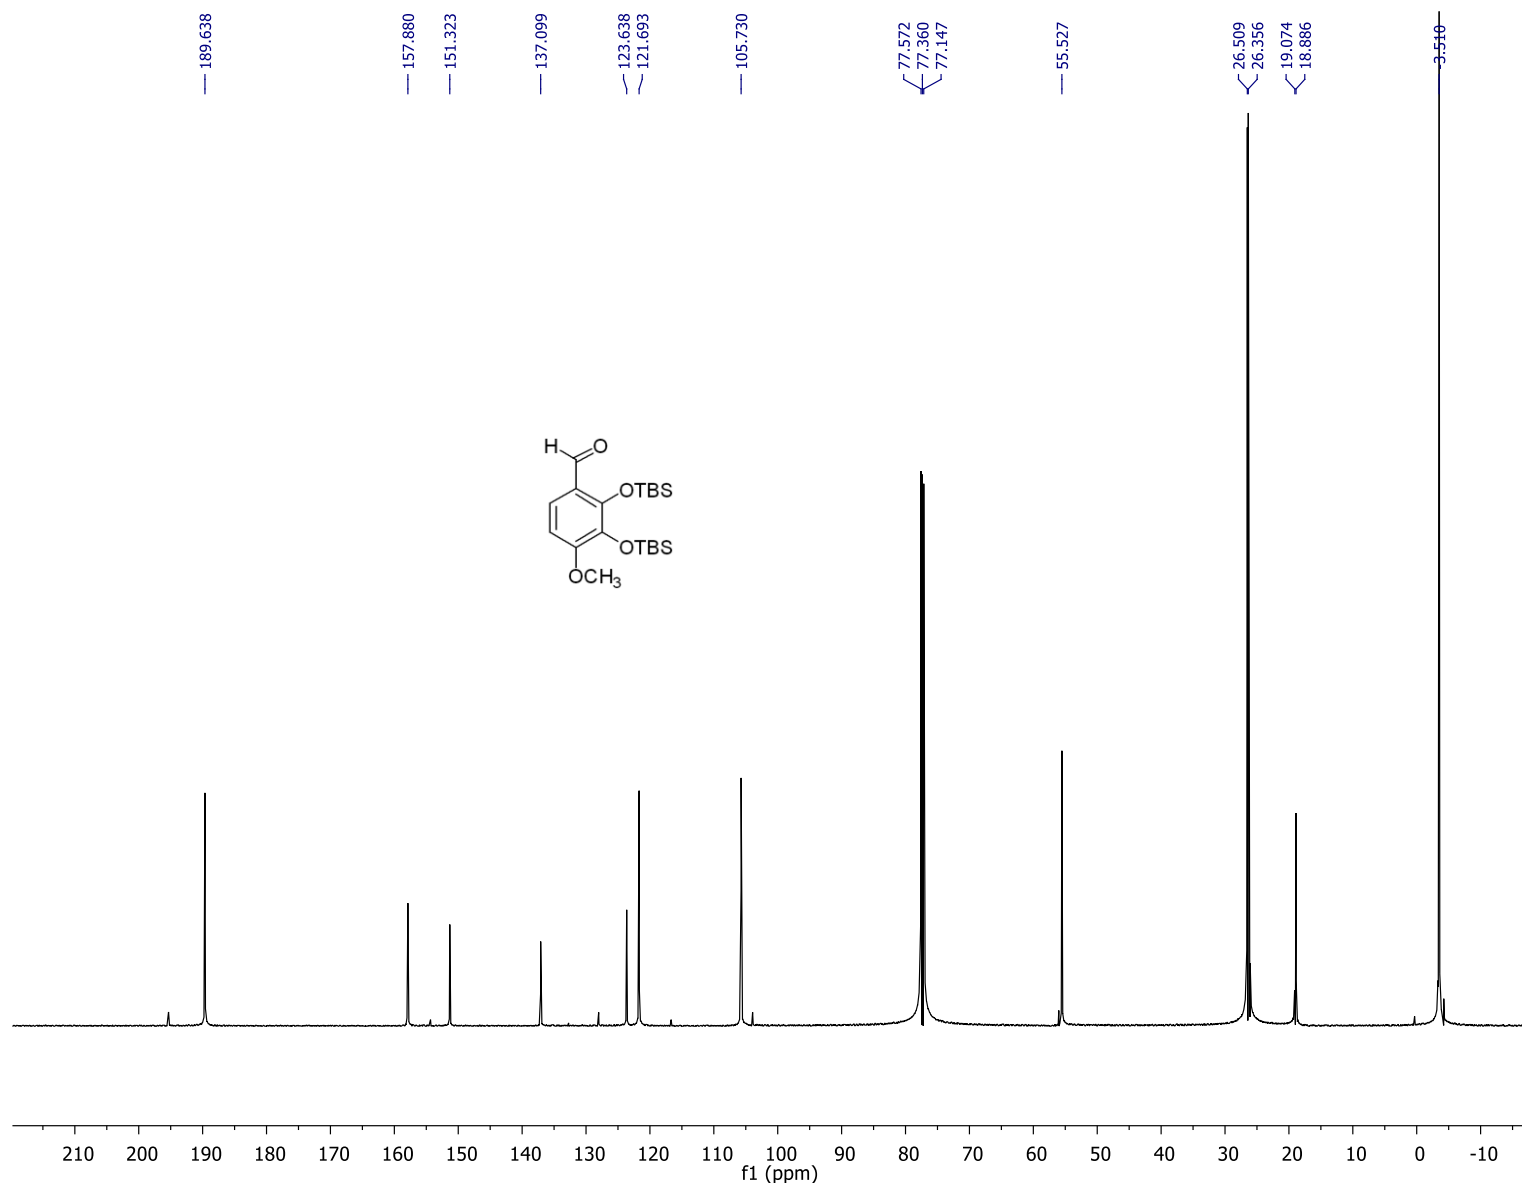

<sup>1</sup>H NMR (500 MHz, CDCl<sub>3</sub>) for Compound **6**

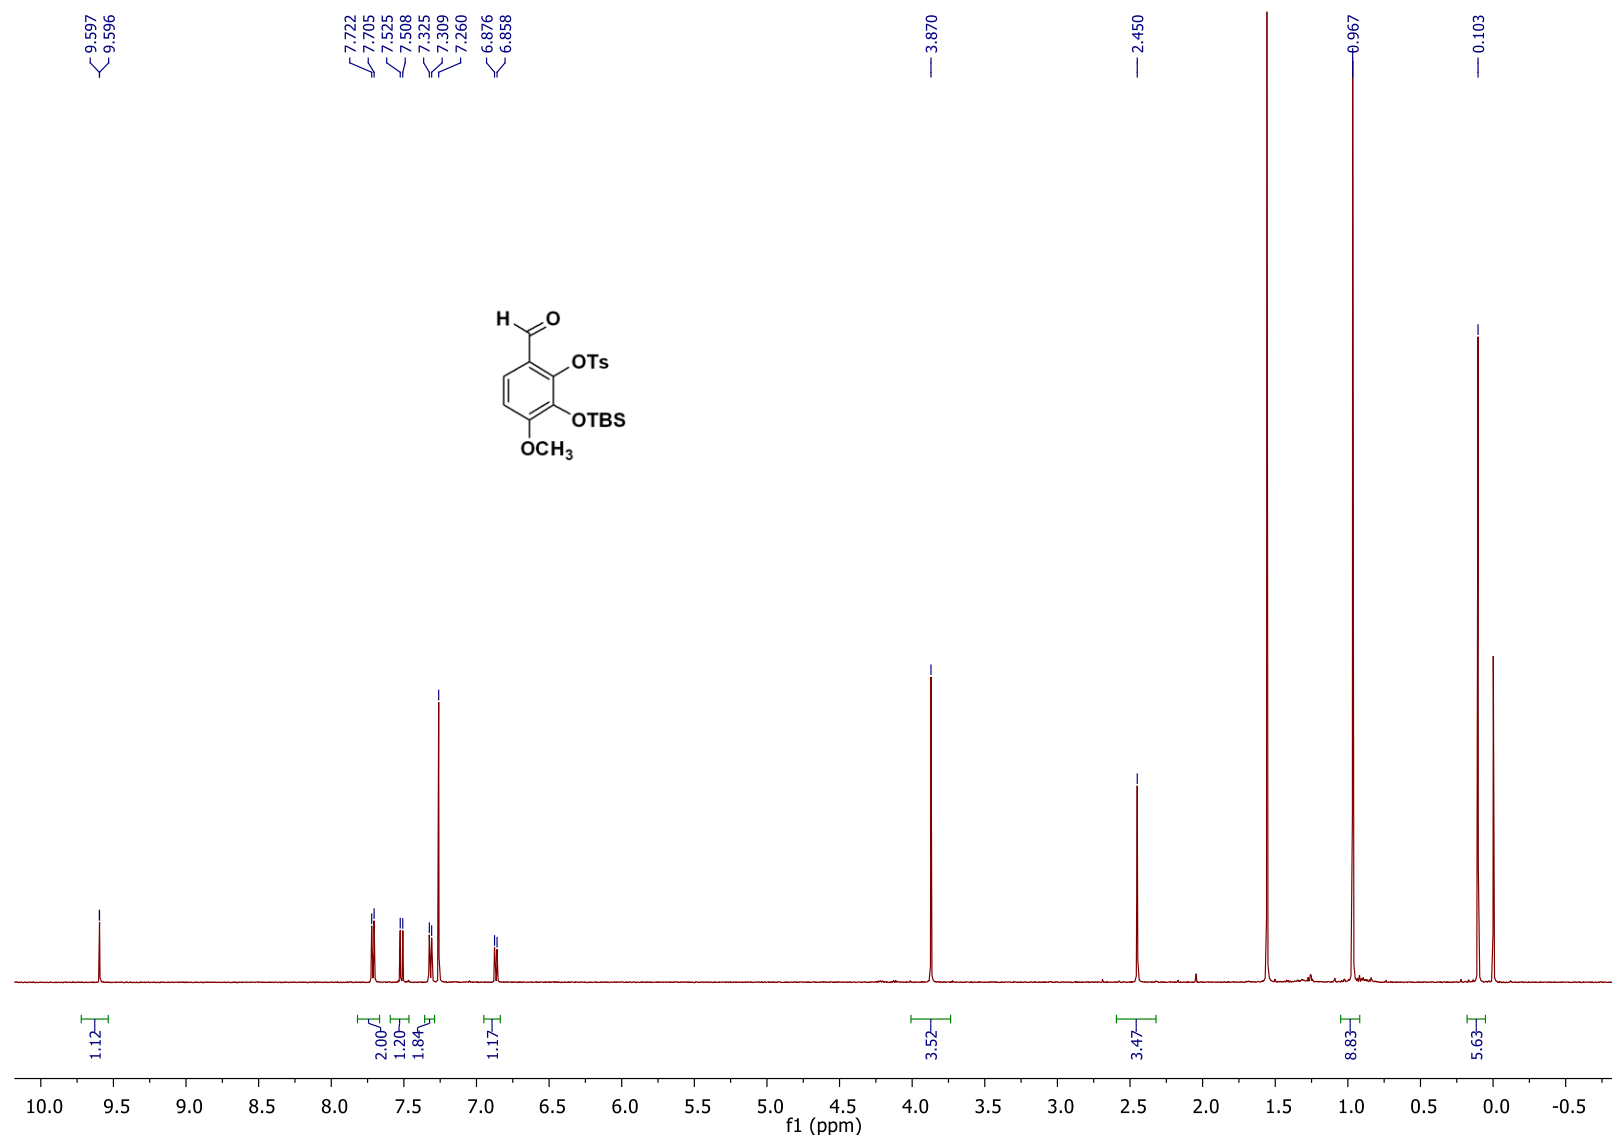

<sup>13</sup>C NMR (126 MHz, CDCl<sub>3</sub>) for Compound **6**

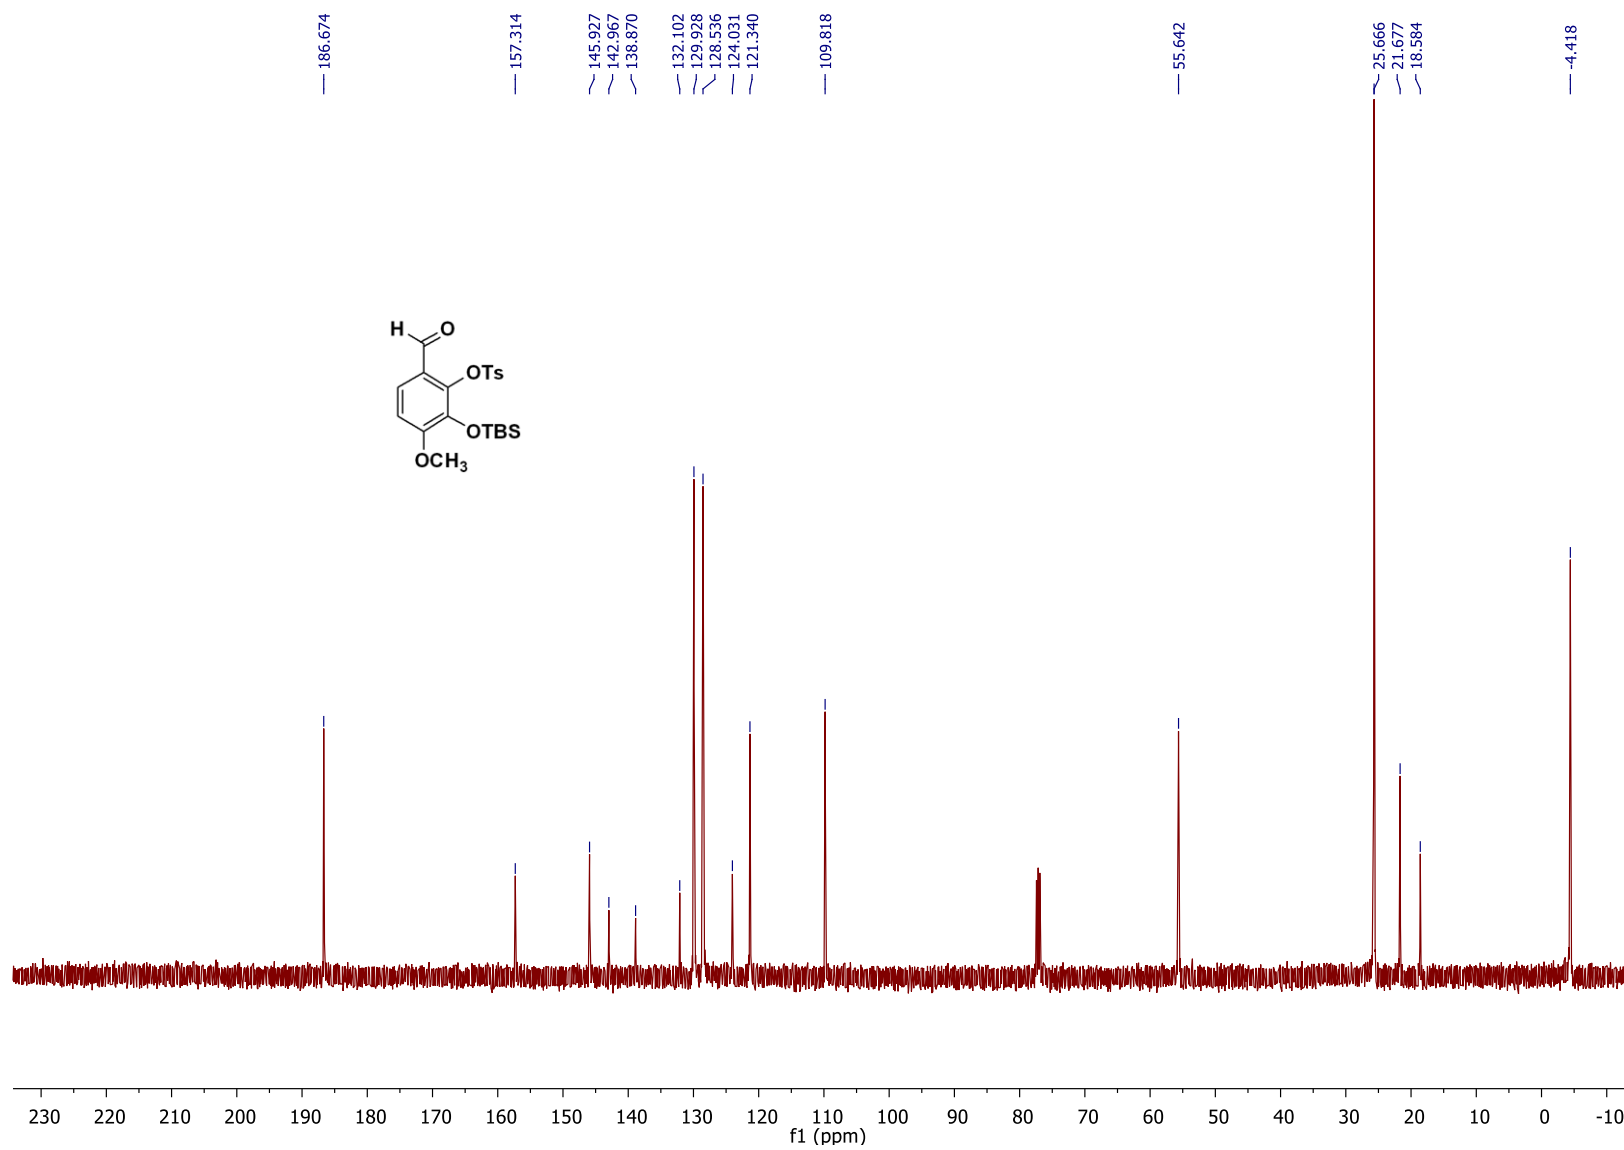

<sup>1</sup>H NMR (600 MHz, CDCl<sub>3</sub>) for Compound 7

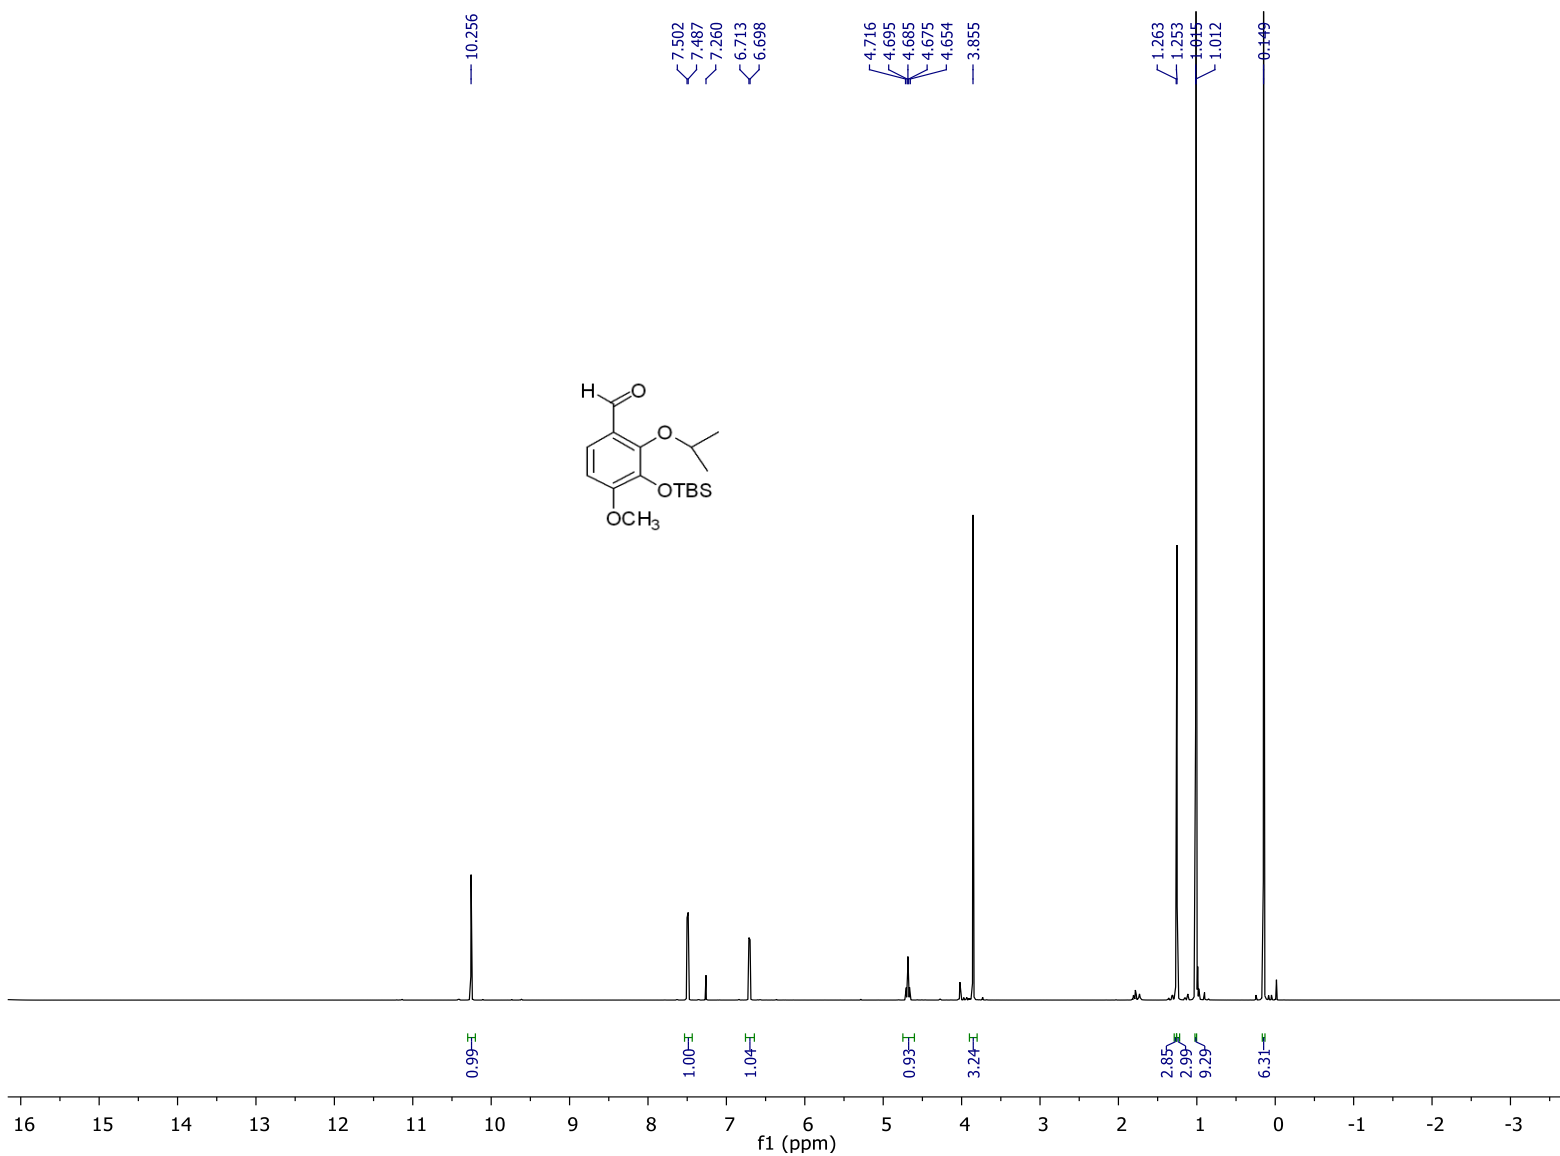

<sup>13</sup>C NMR (151 MHz, CDCl<sub>3</sub>) for Compound **7**

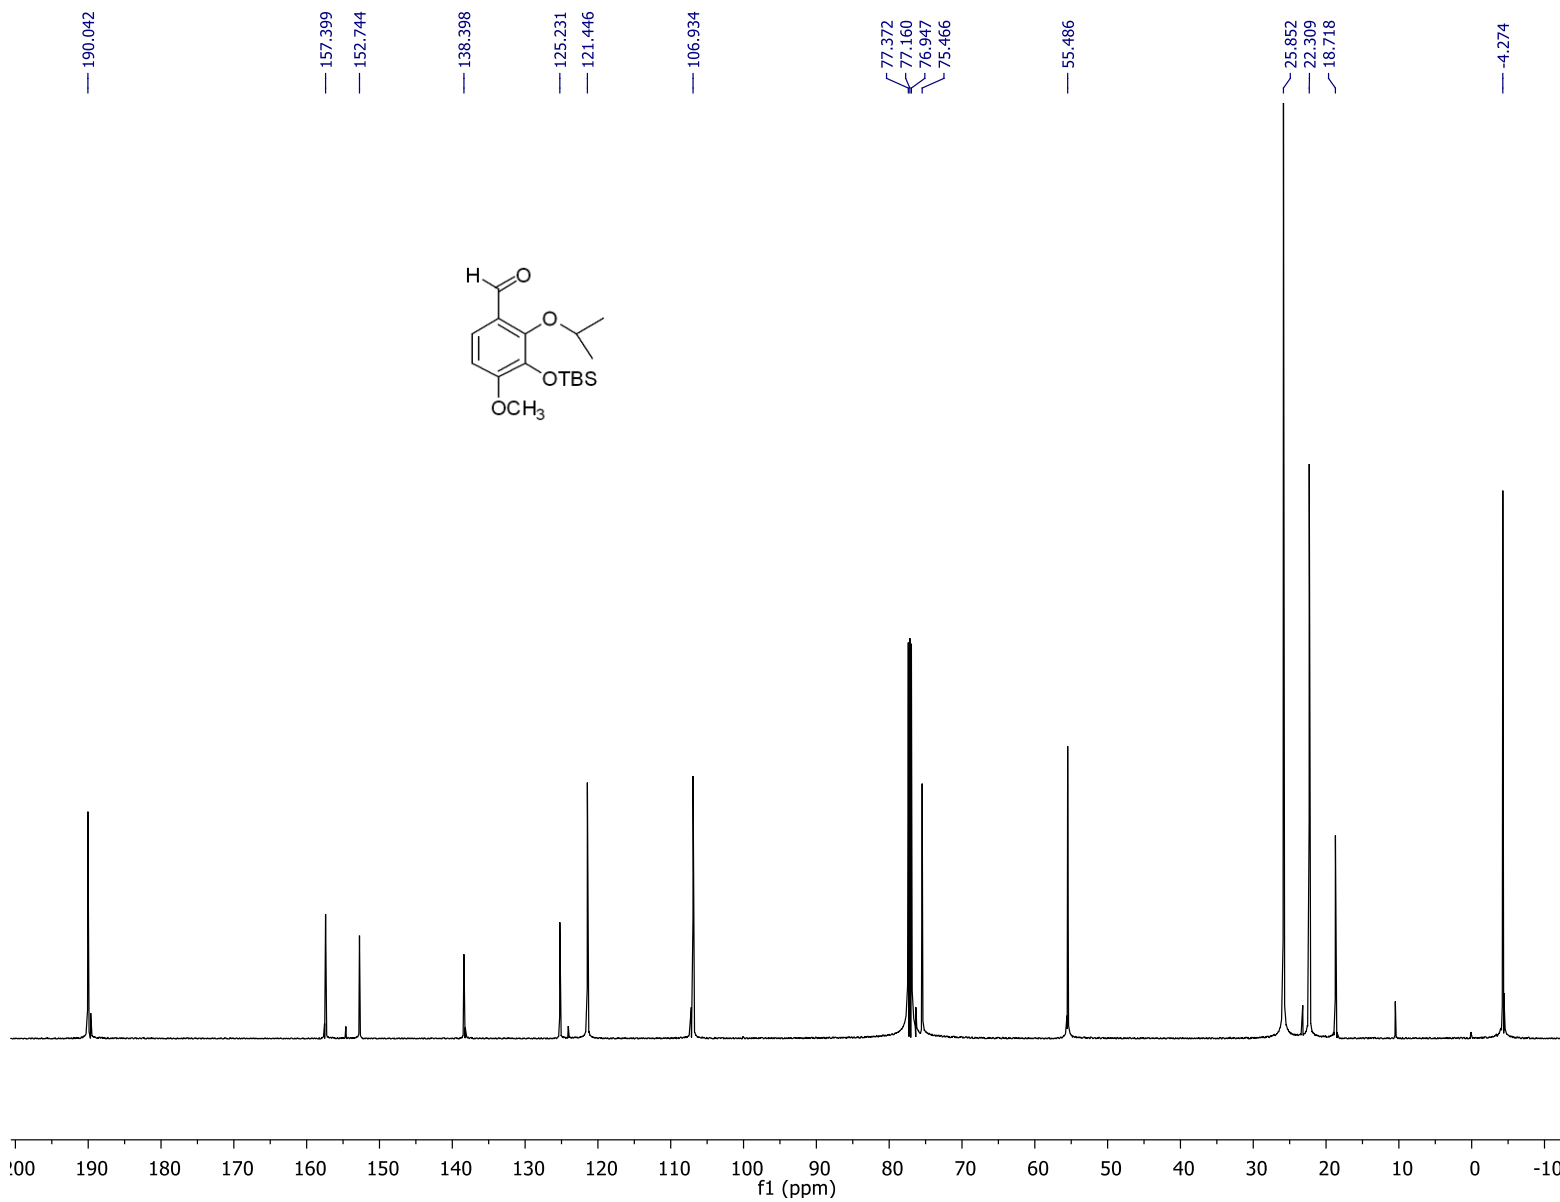

**Chemical Structure:** 3,4,5-trimethoxybenzyltriphenylphosphonium bromide

**<sup>1</sup>H NMR Data (ppm):**

| Chemical Shift (ppm)                                                                                                                              | Integration |
|---------------------------------------------------------------------------------------------------------------------------------------------------|-------------|
| 7.709, 7.707, 7.705, 7.703, 7.698, 7.695, 7.689, 7.687, 7.684, 7.683, 7.670, 7.571, 7.566, 7.562, 7.558, 7.553, 7.545, 7.540, 7.260, 6.427, 6.423 | 9.05        |
| 5.302, 5.279                                                                                                                                      | 2.00        |
| 3.698, 3.692, 3.437, 3.431                                                                                                                        | 3.00, 6.05  |
| 2.1                                                                                                                                               | -           |

$^{31}\text{P}$  NMR (240 MHz,  $\text{CDCl}_3$ ) for Compound **10**

— 23.217

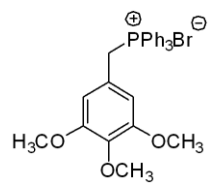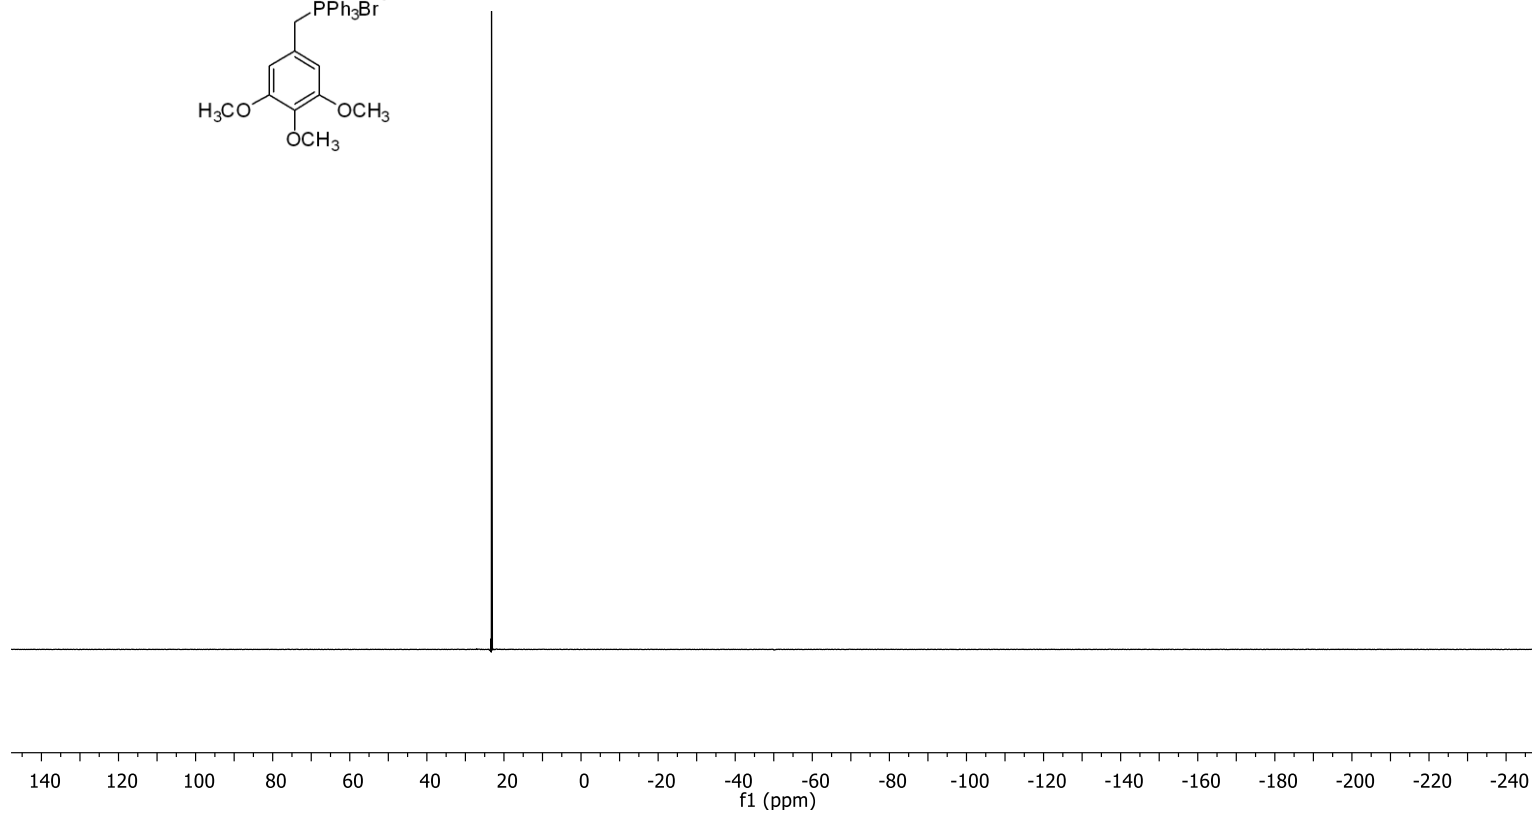

<sup>1</sup>H NMR (500 MHz, CDCl<sub>3</sub>) Compound **11**

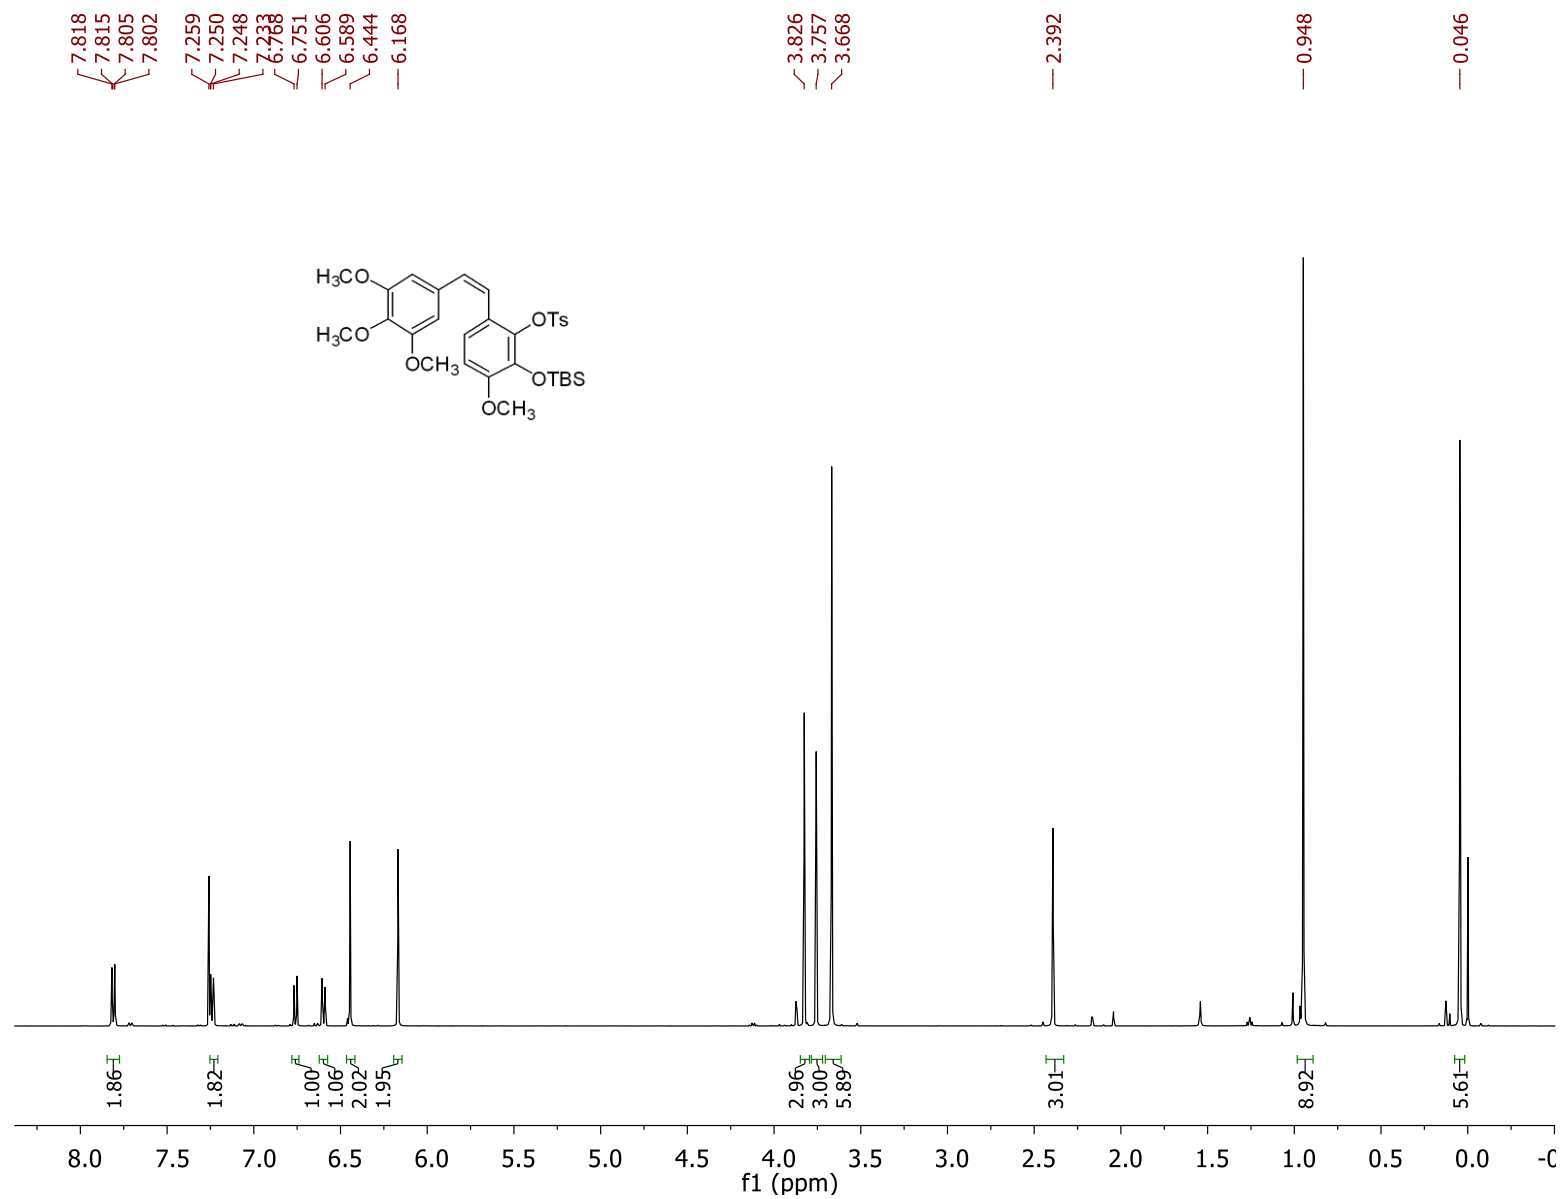

<sup>13</sup>C NMR (126 MHz, CDCl<sub>3</sub>) for Compound **11**

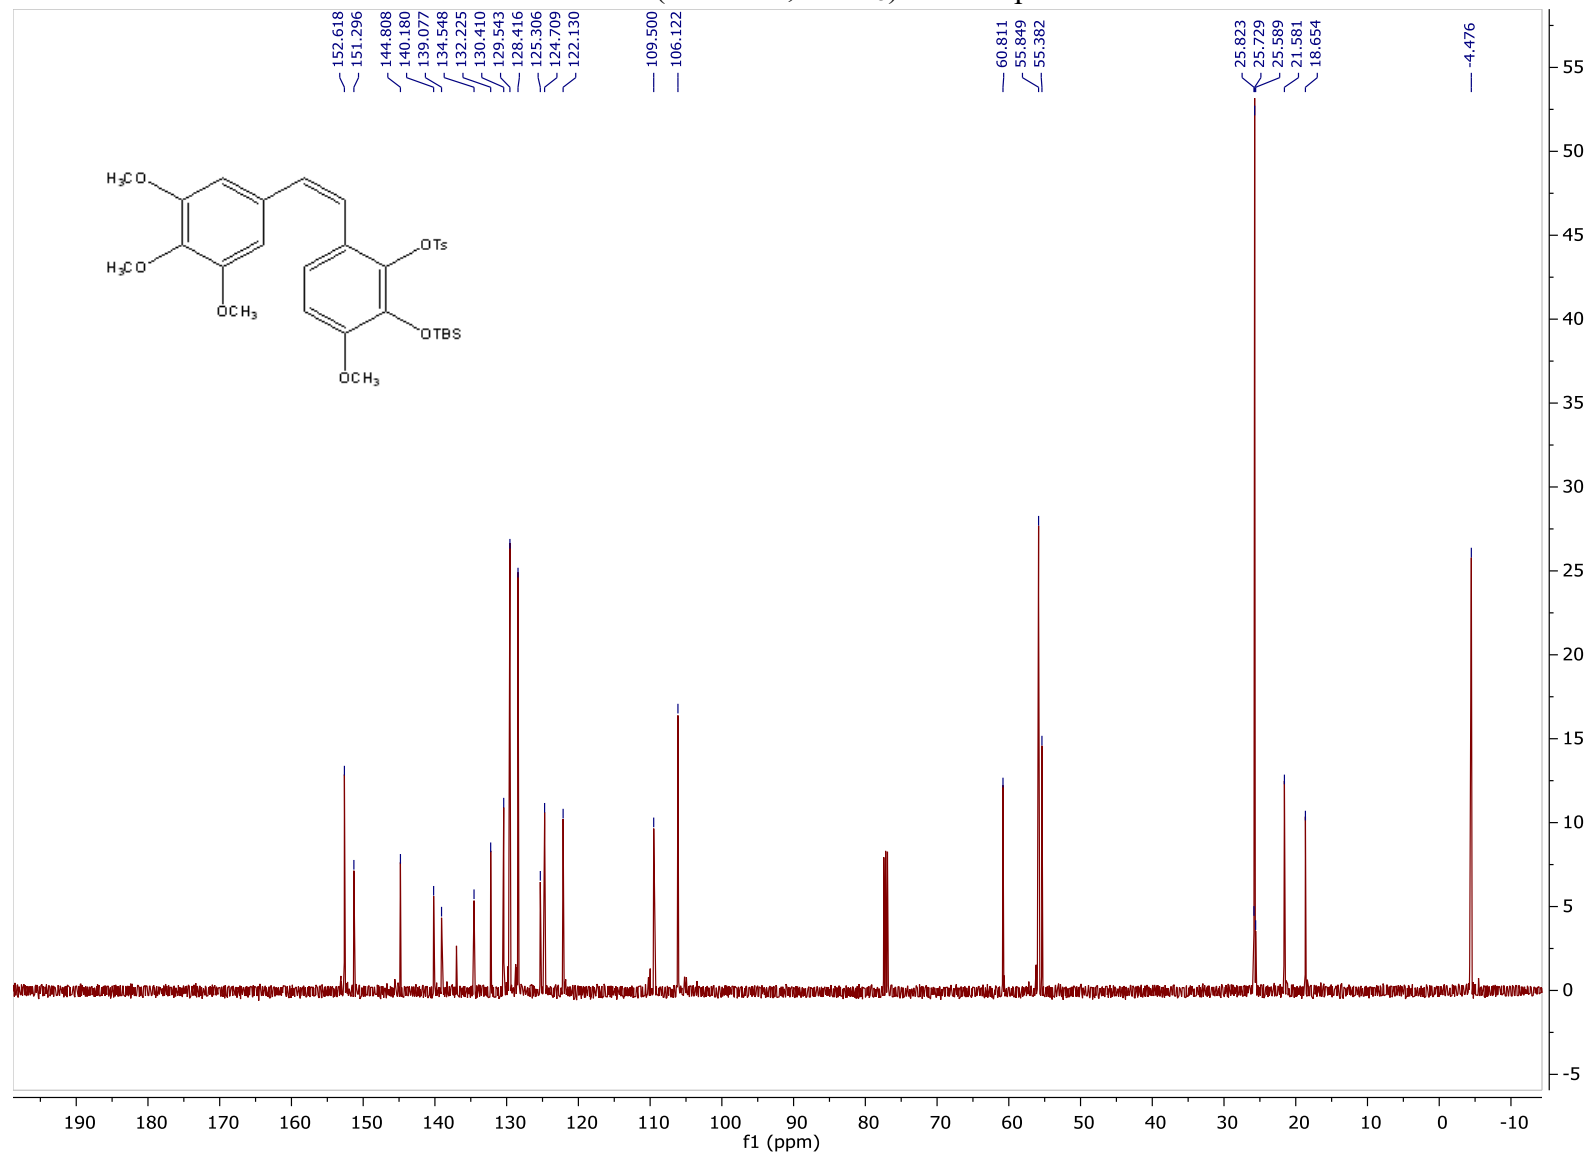

<sup>1</sup>H NMR (600 MHz, CDCl<sub>3</sub>) Compound **12**

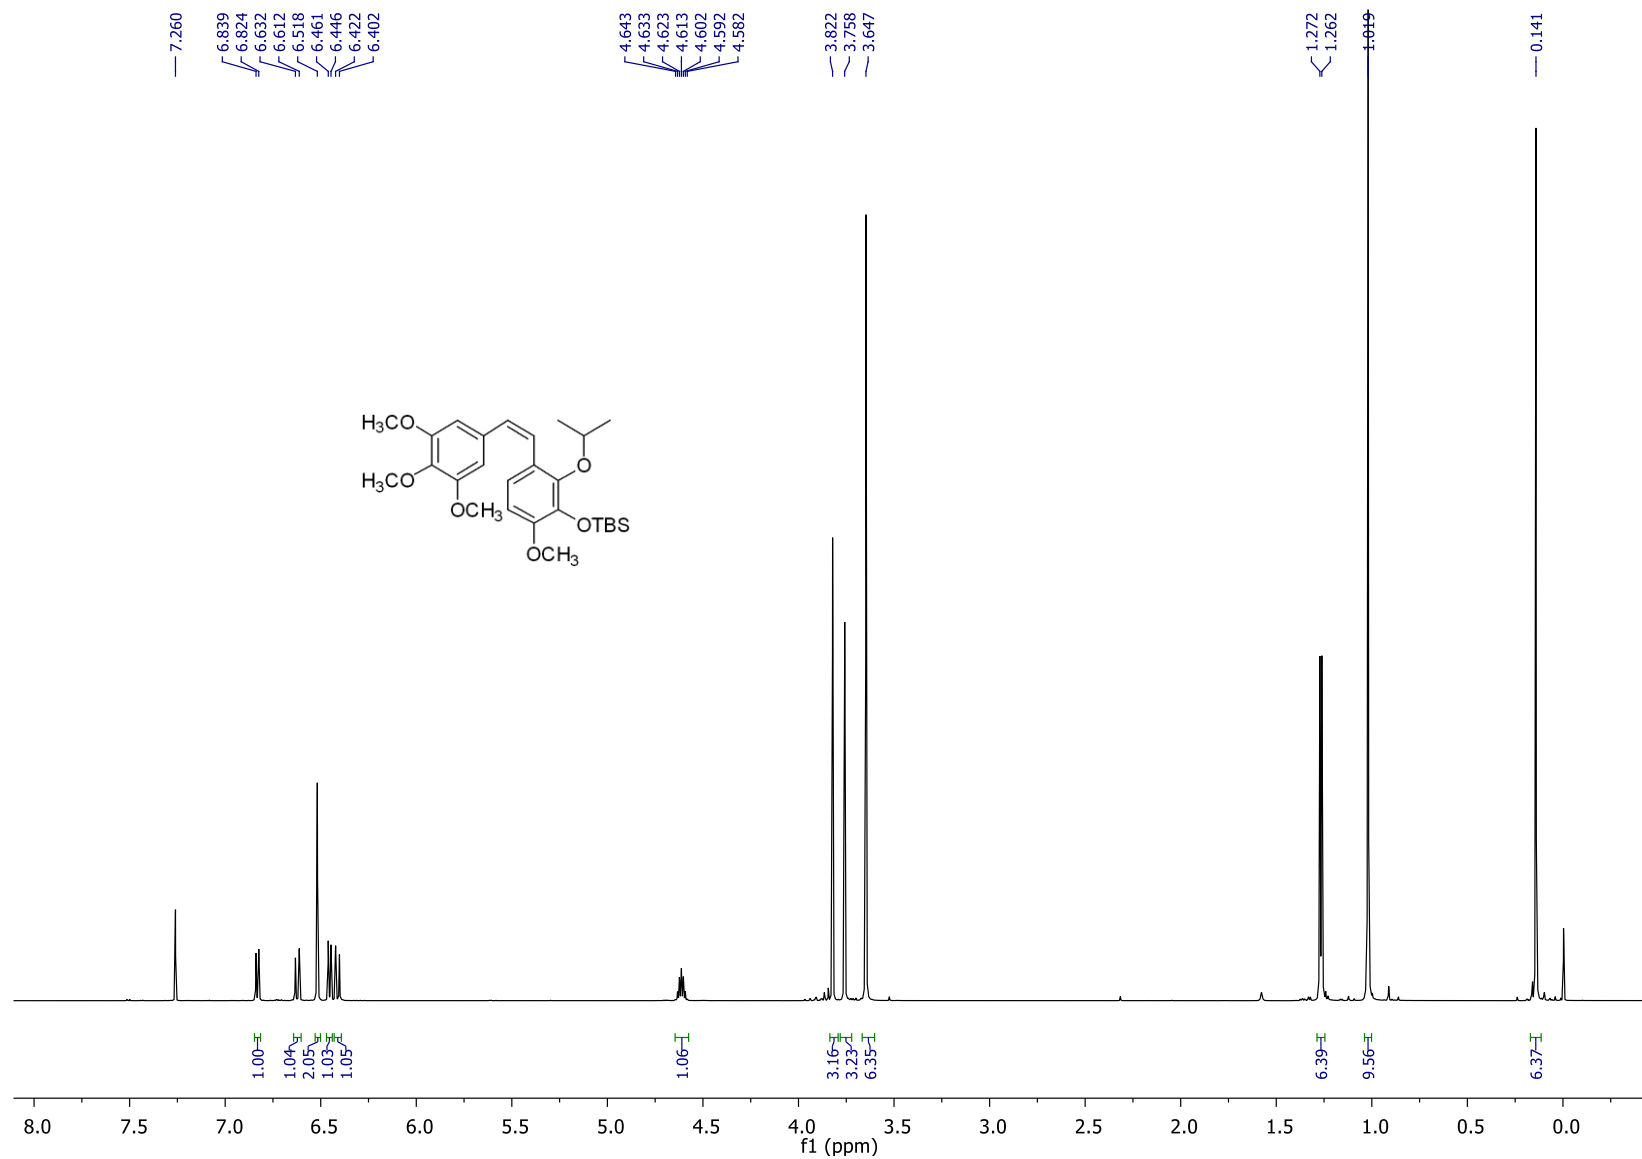

<sup>13</sup>C NMR (151 MHz, CDCl<sub>3</sub>) for Compound **12**

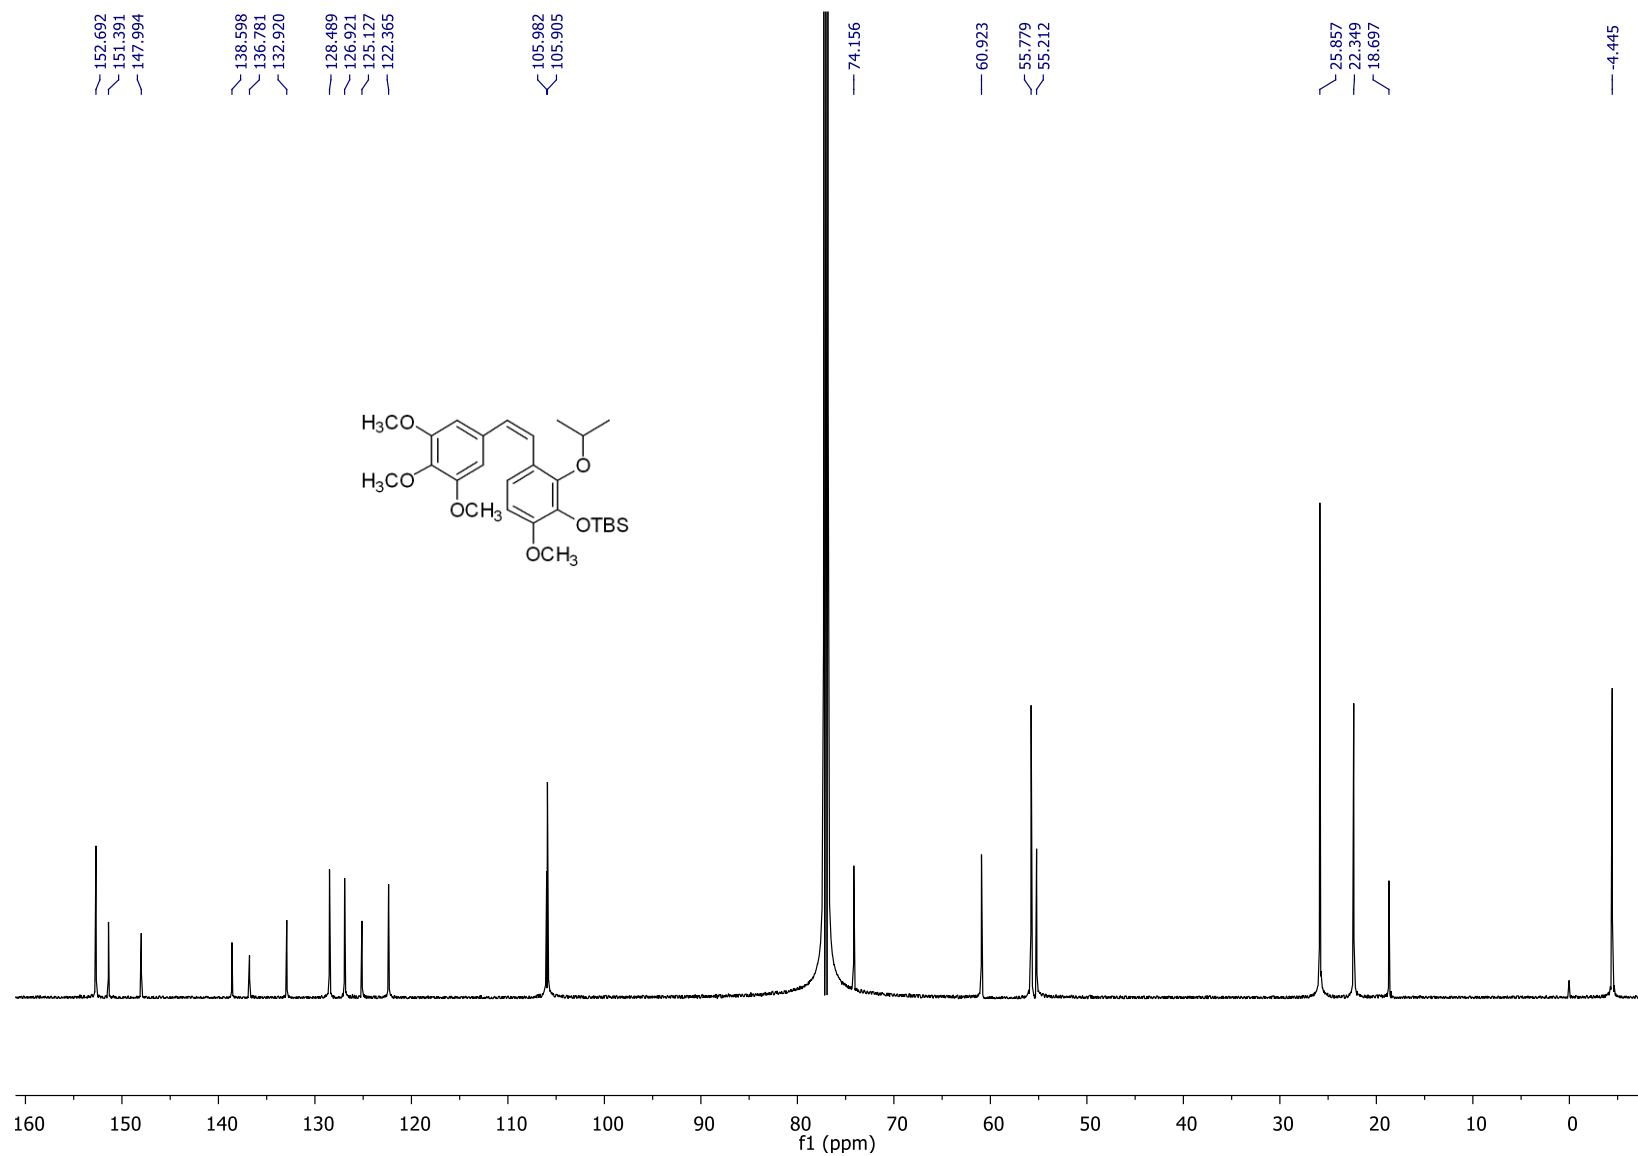

<sup>1</sup>H NMR (500 MHz, CDCl<sub>3</sub>) for Compound **13**

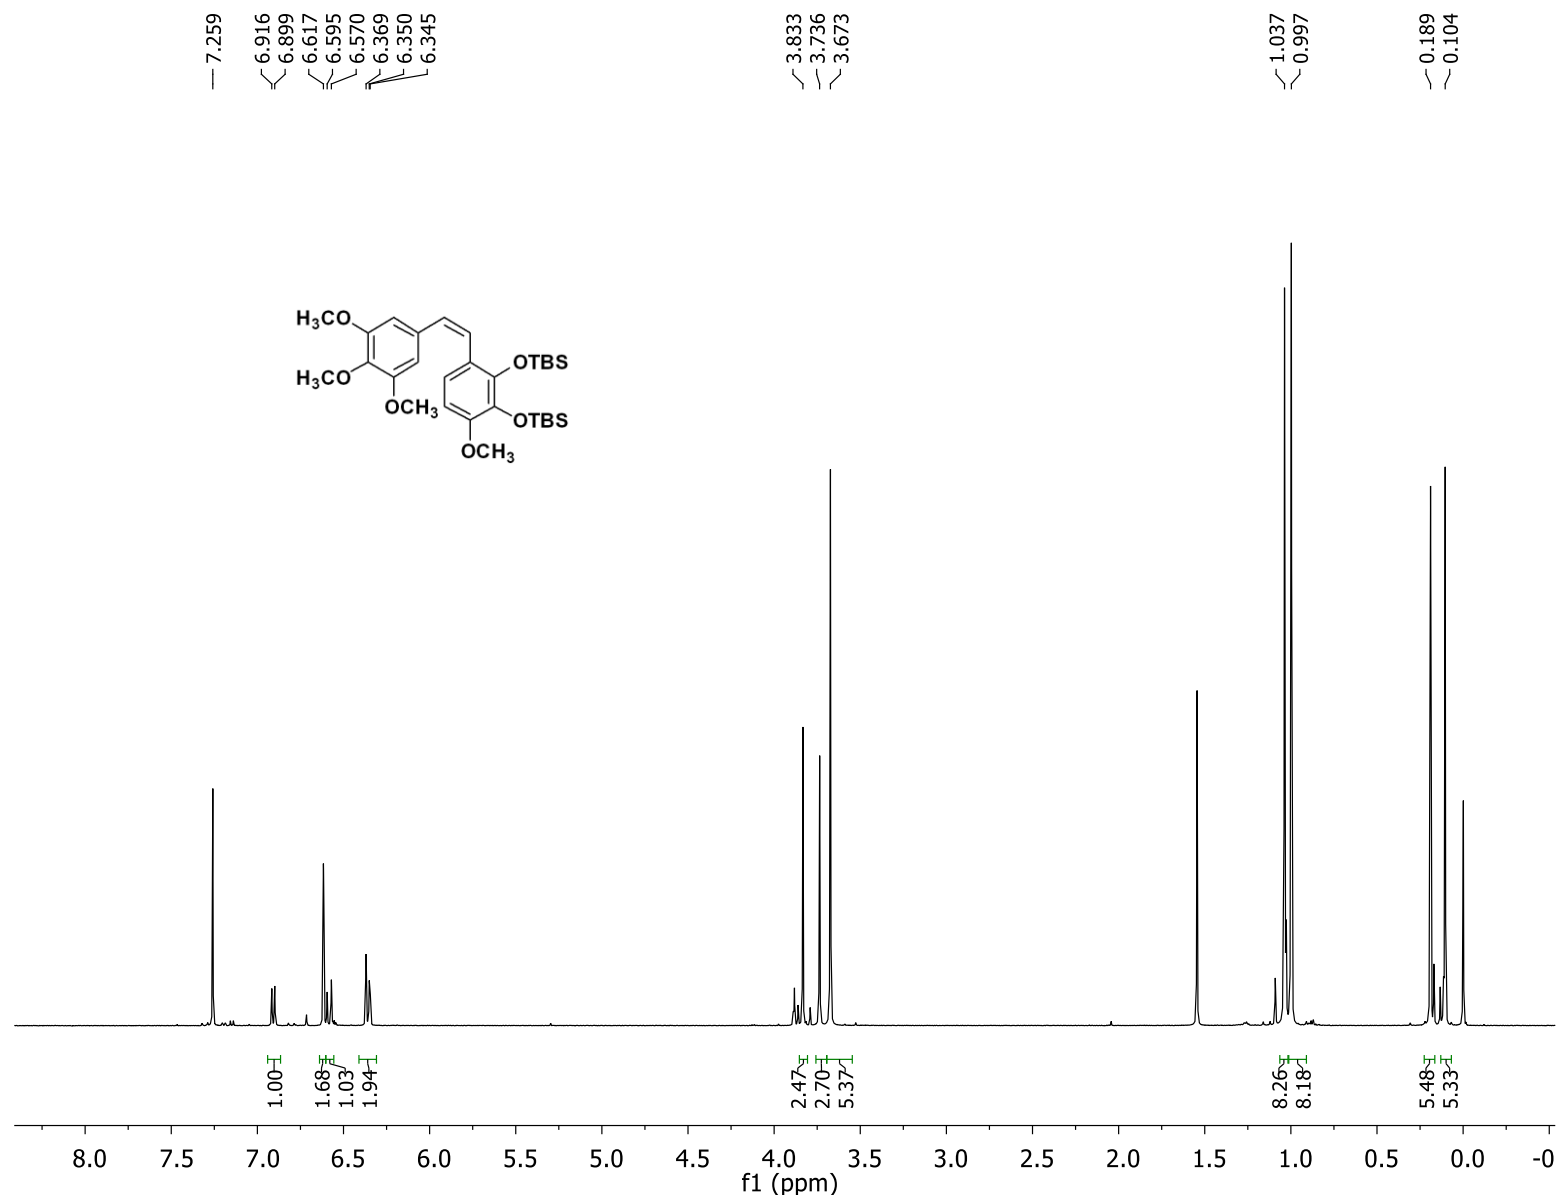

<sup>13</sup>C NMR (125 MHz, CDCl<sub>3</sub>) for Compound **13**

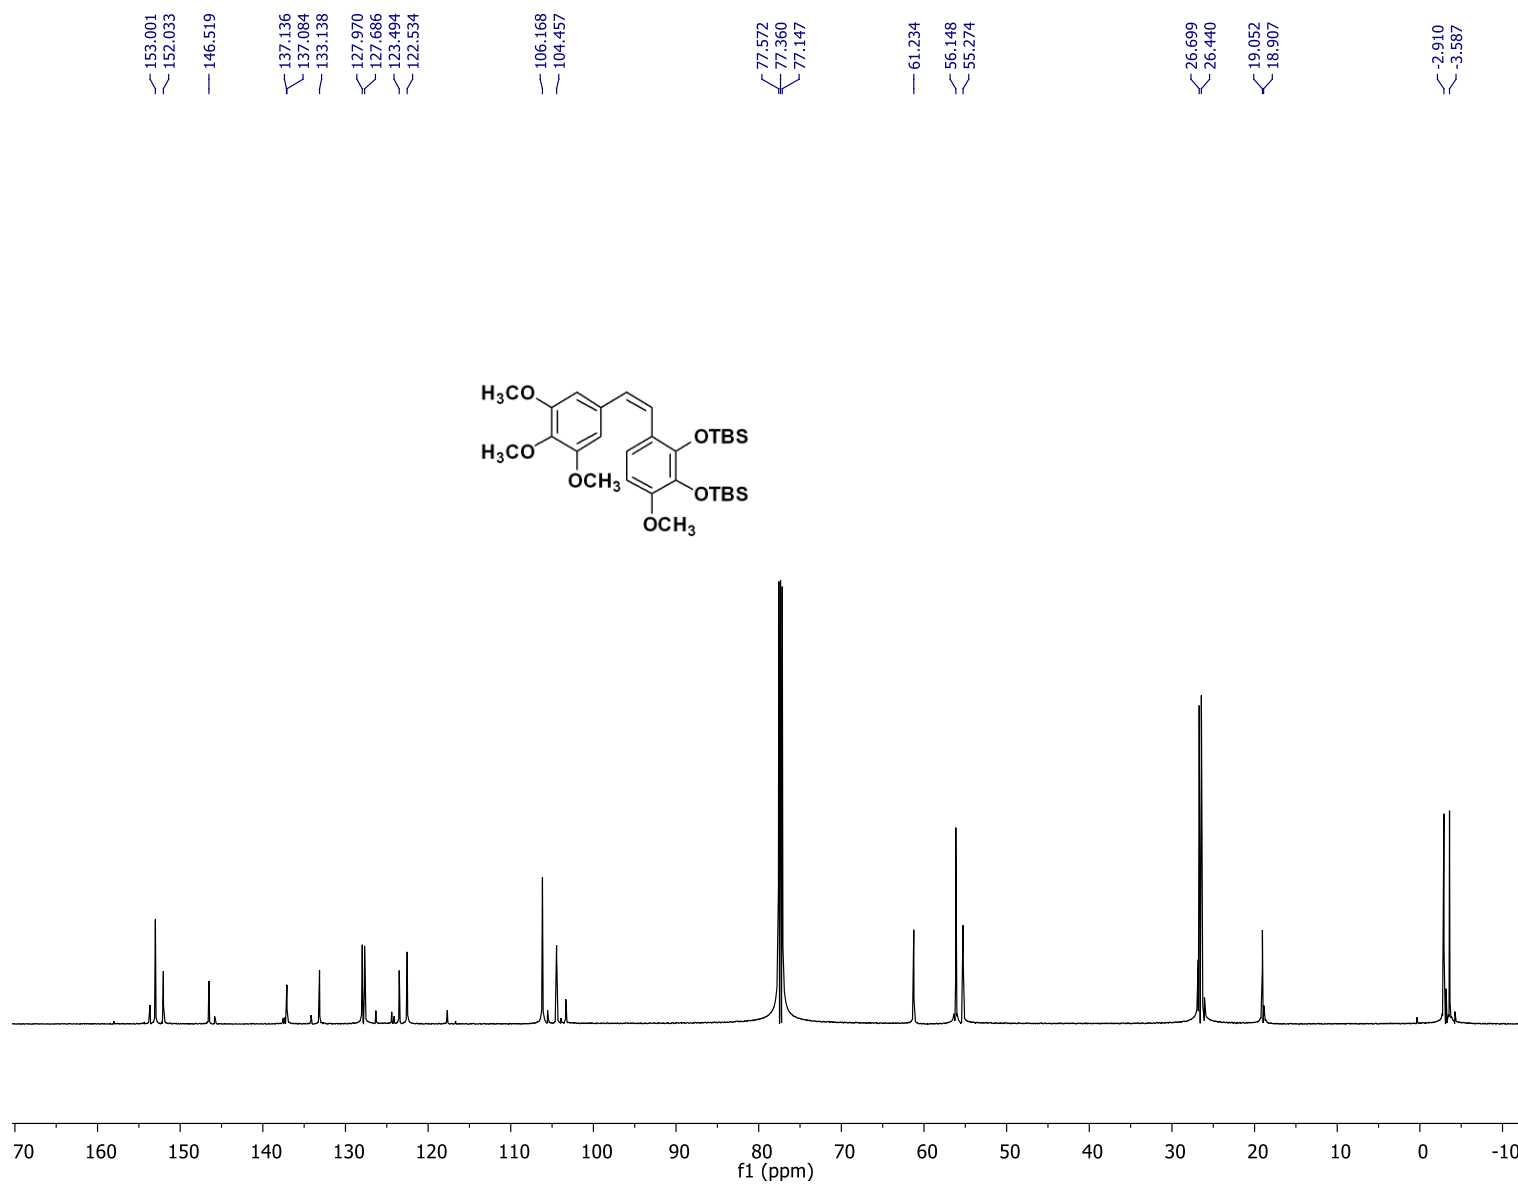

<sup>1</sup>H NMR (500 MHz, CDCl<sub>3</sub>) for Compound **15**

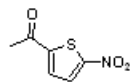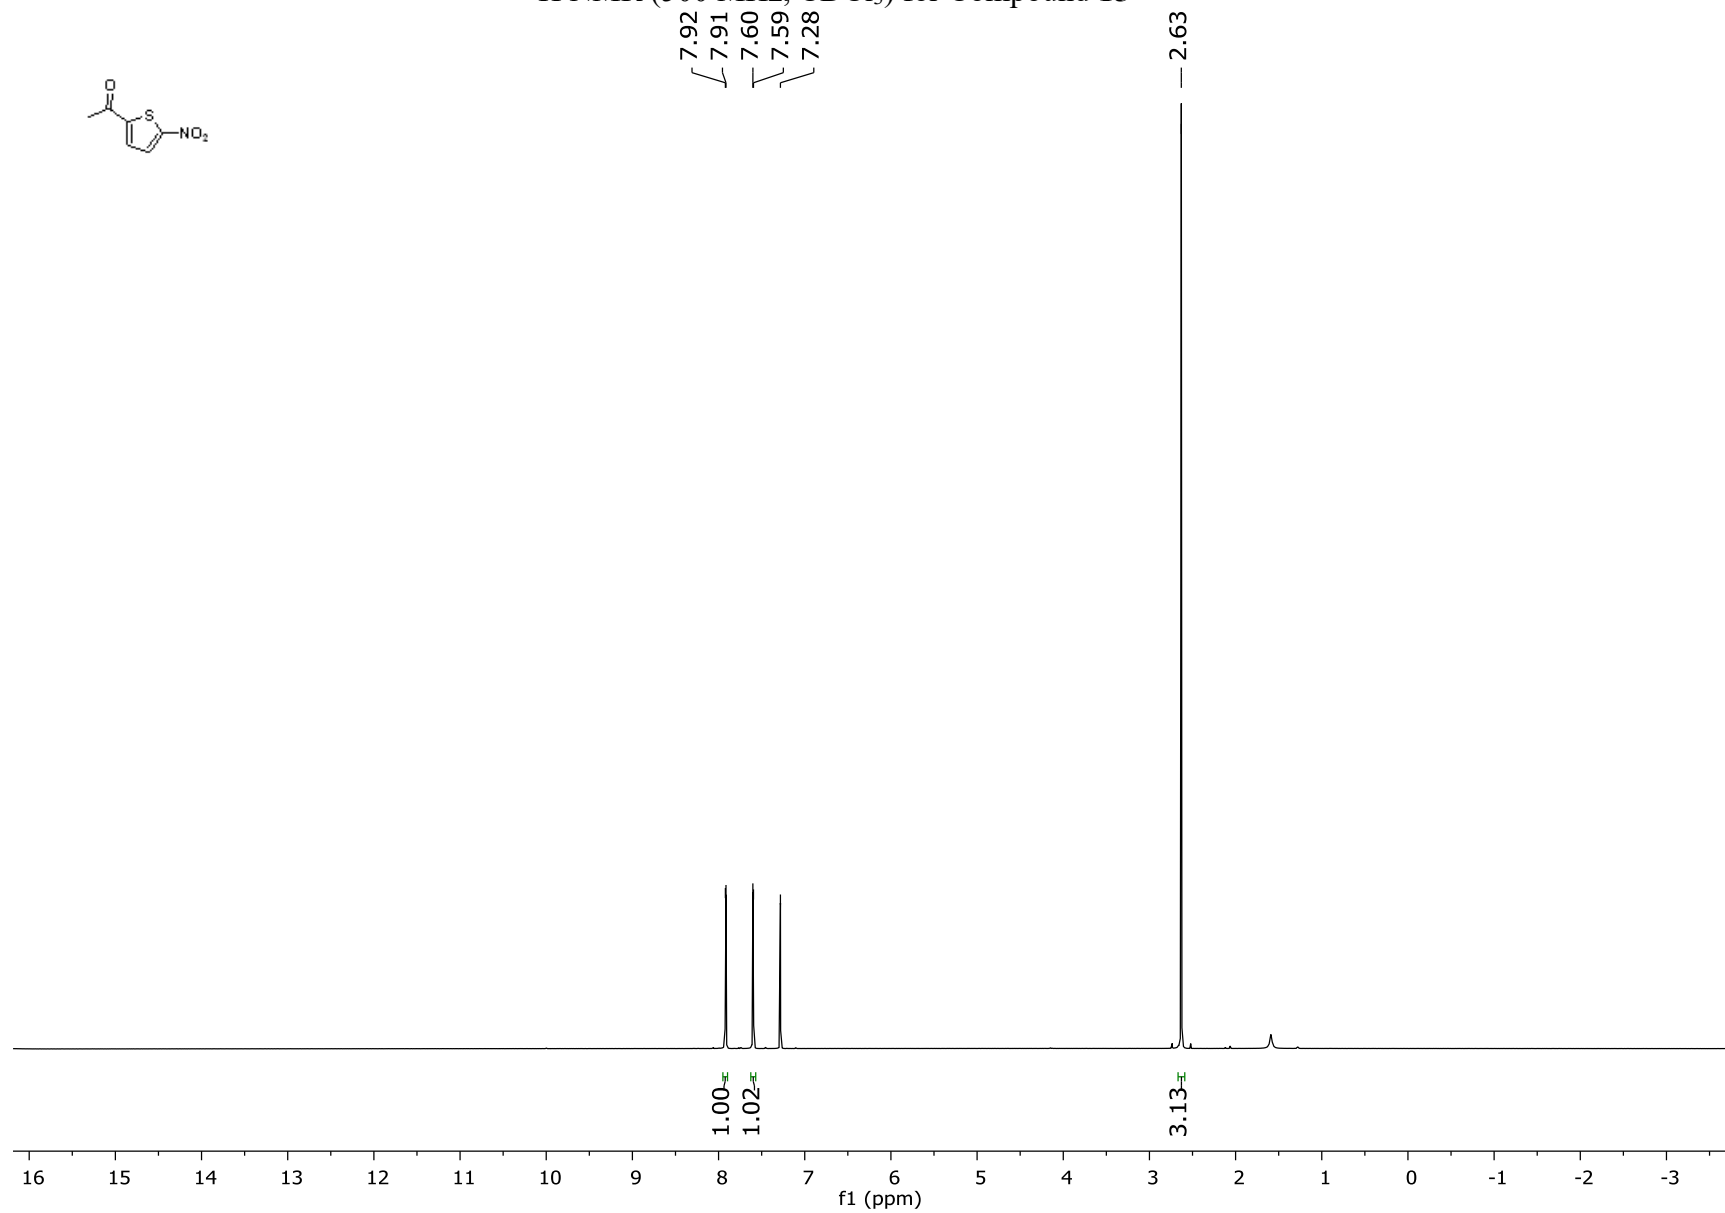

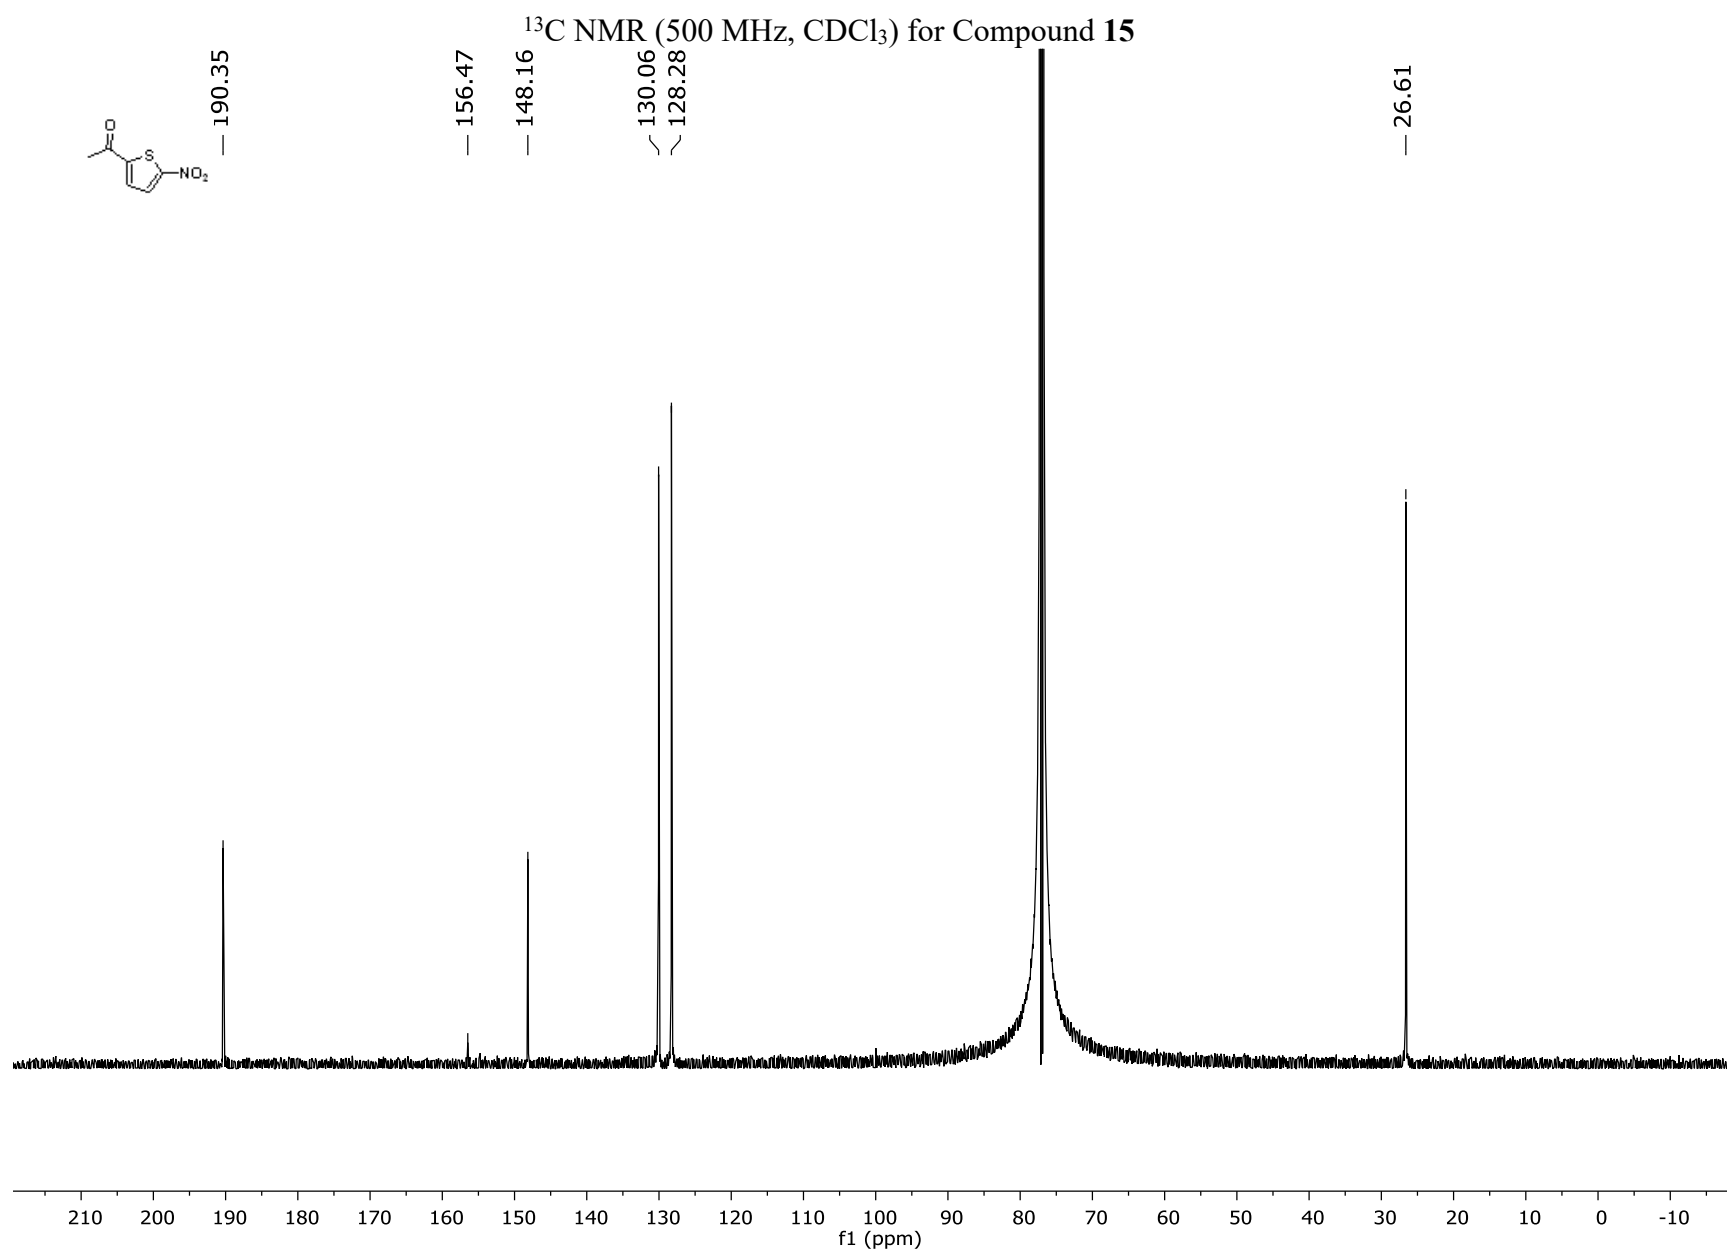

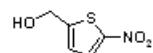

<sup>1</sup>H NMR (500 MHz, CDCl<sub>3</sub>) for Compound **16**

7.84  
7.83  
7.28  
6.96  
6.96  
6.96  
6.95  
6.95  
6.95

4.91  
4.90

2.16  
2.15  
2.14

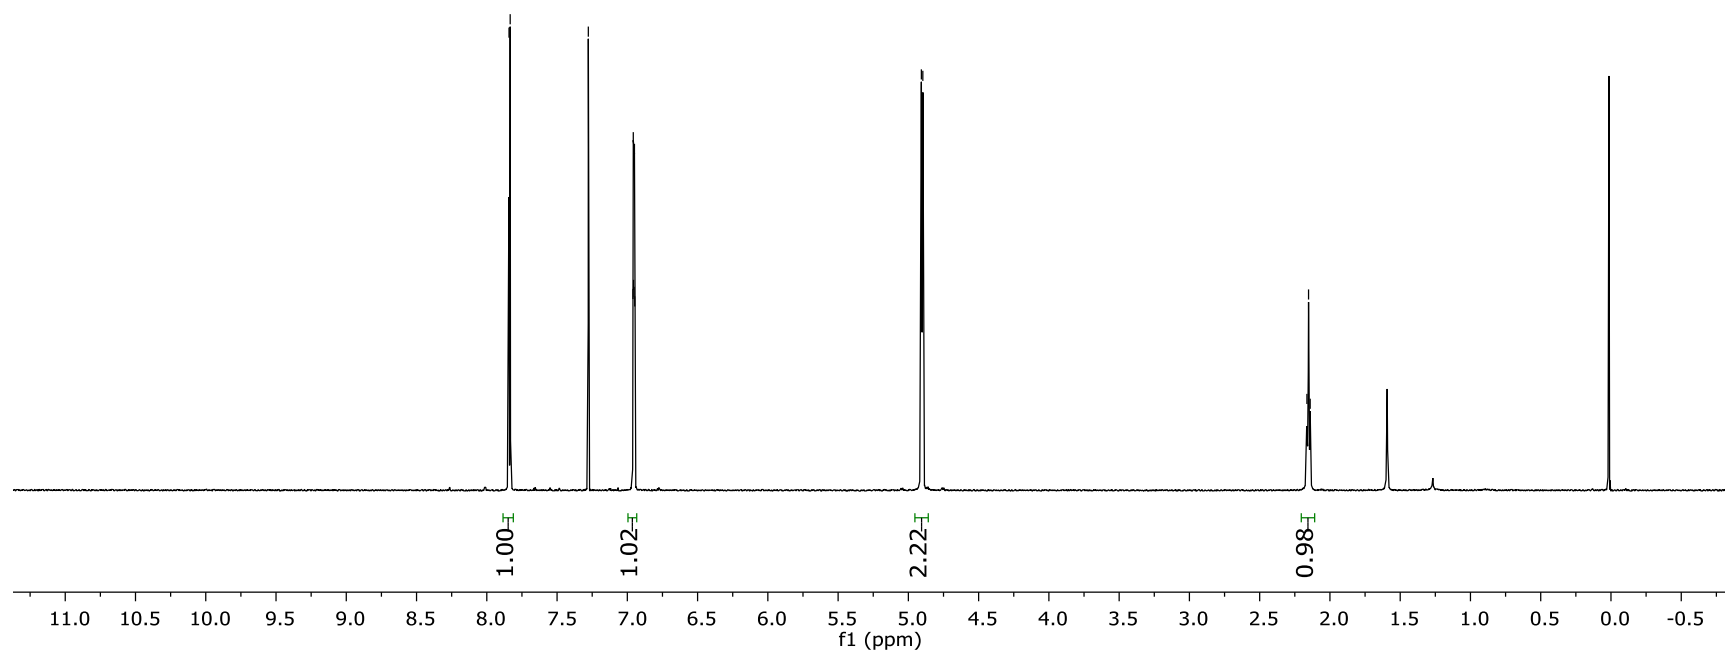

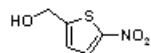

$^{13}\text{C}$  NMR (500 MHz,  $\text{CDCl}_3$ ) of Compound **16**

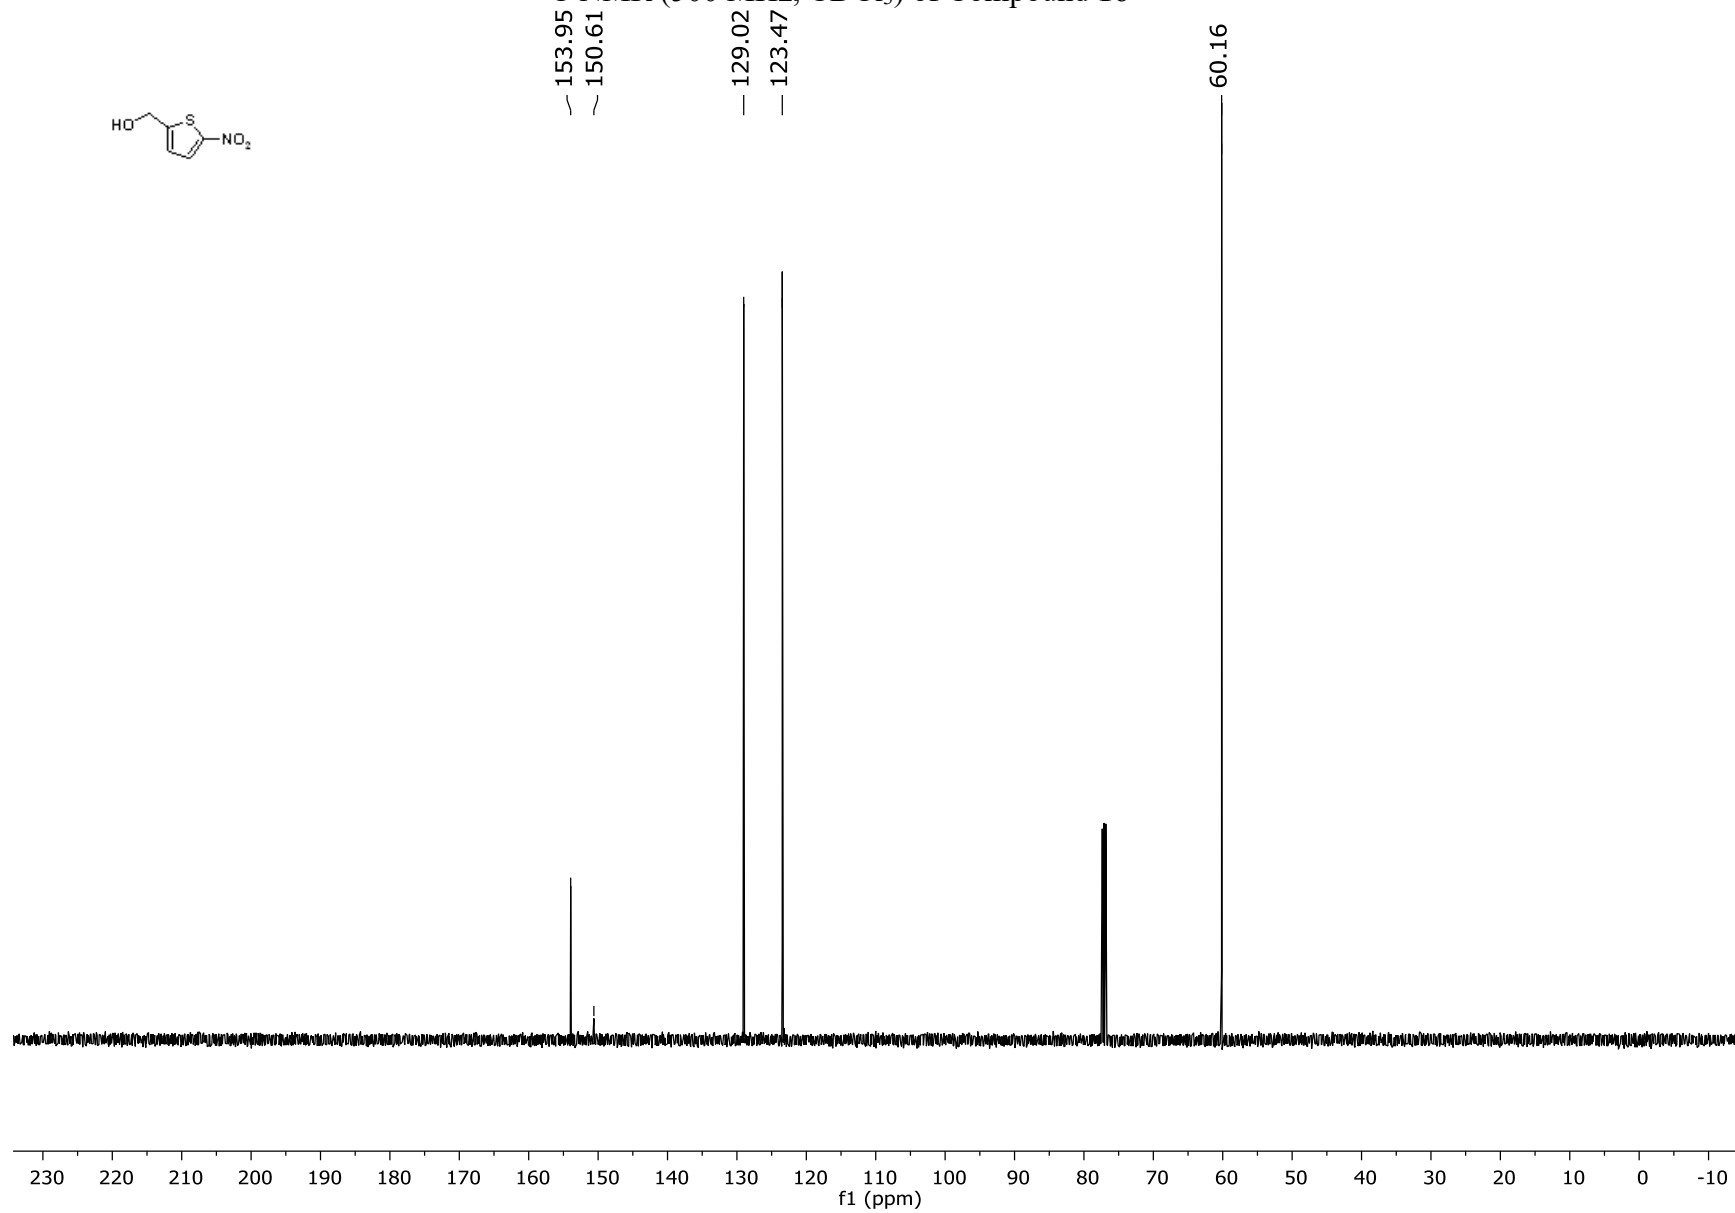

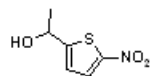

<sup>1</sup>H NMR (500 MHz, CDCl<sub>3</sub>) of Compound 17

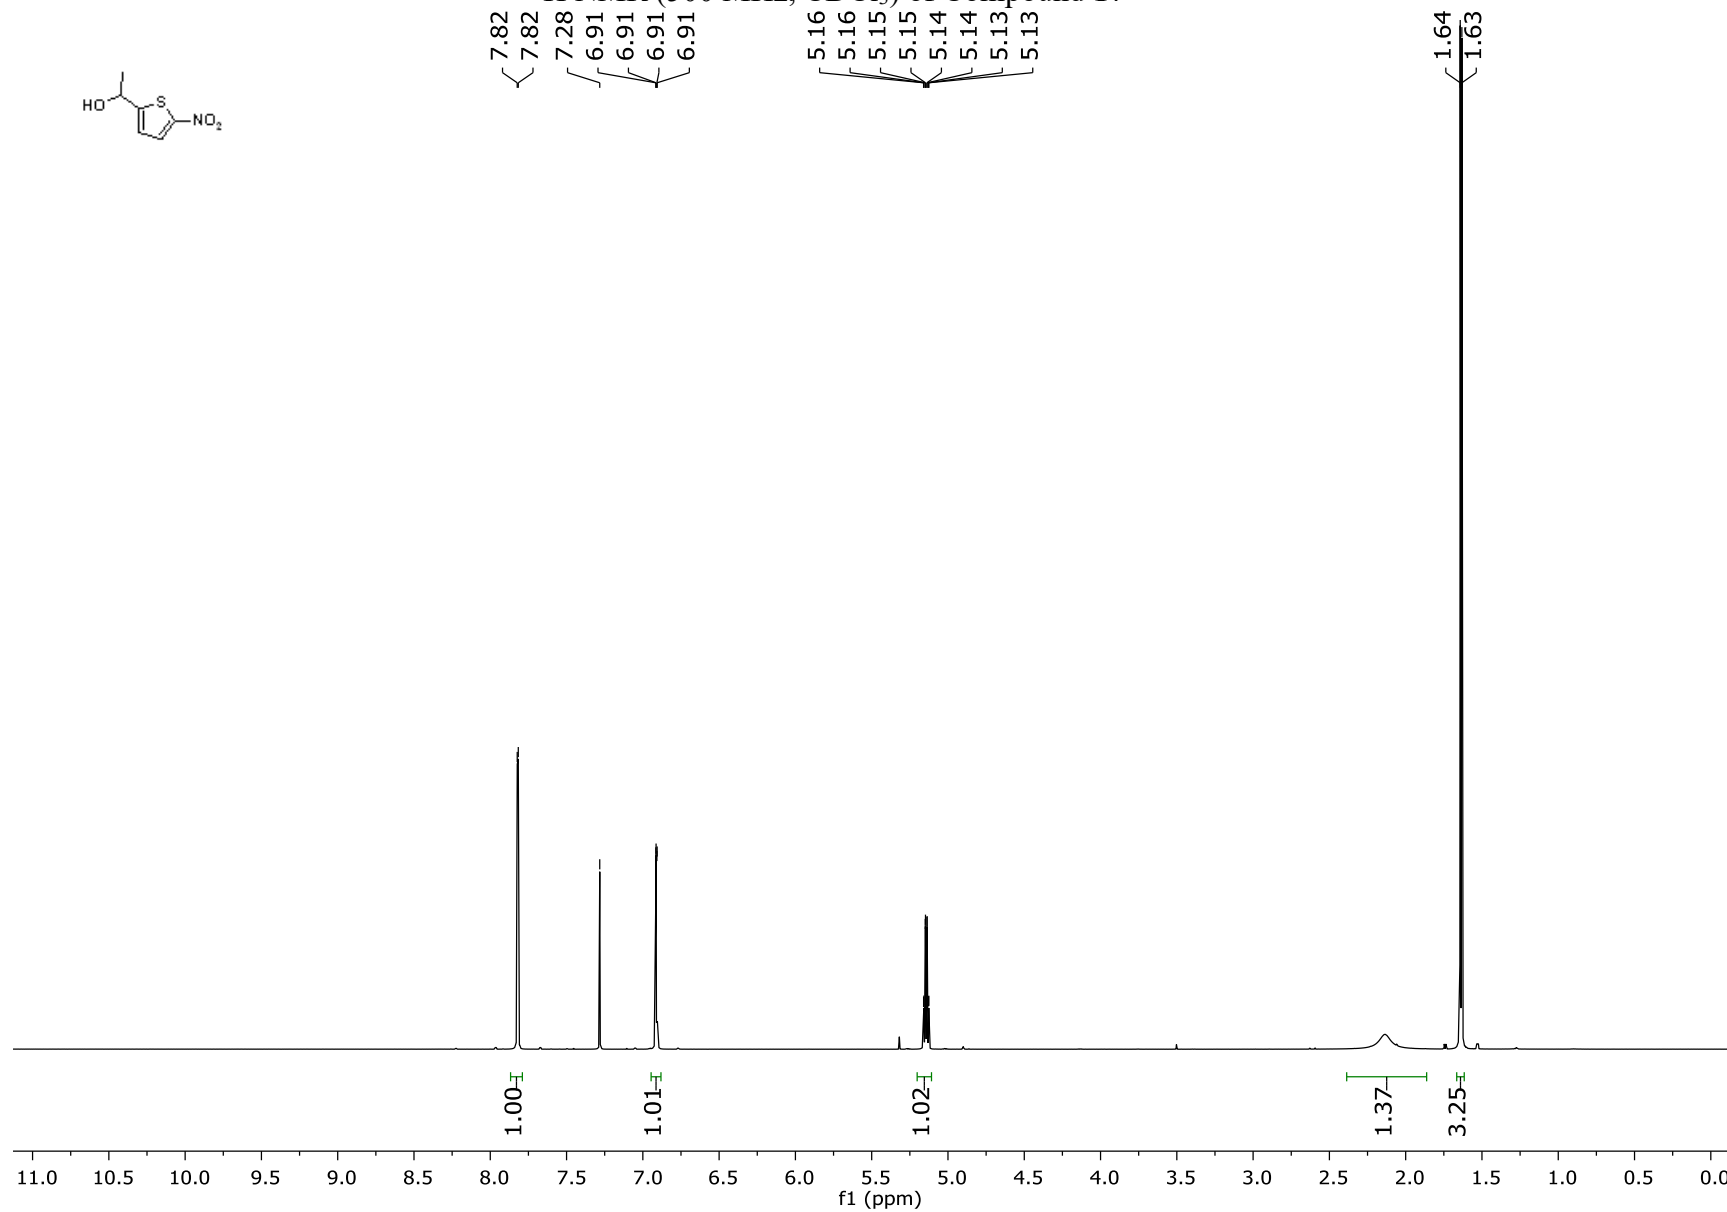

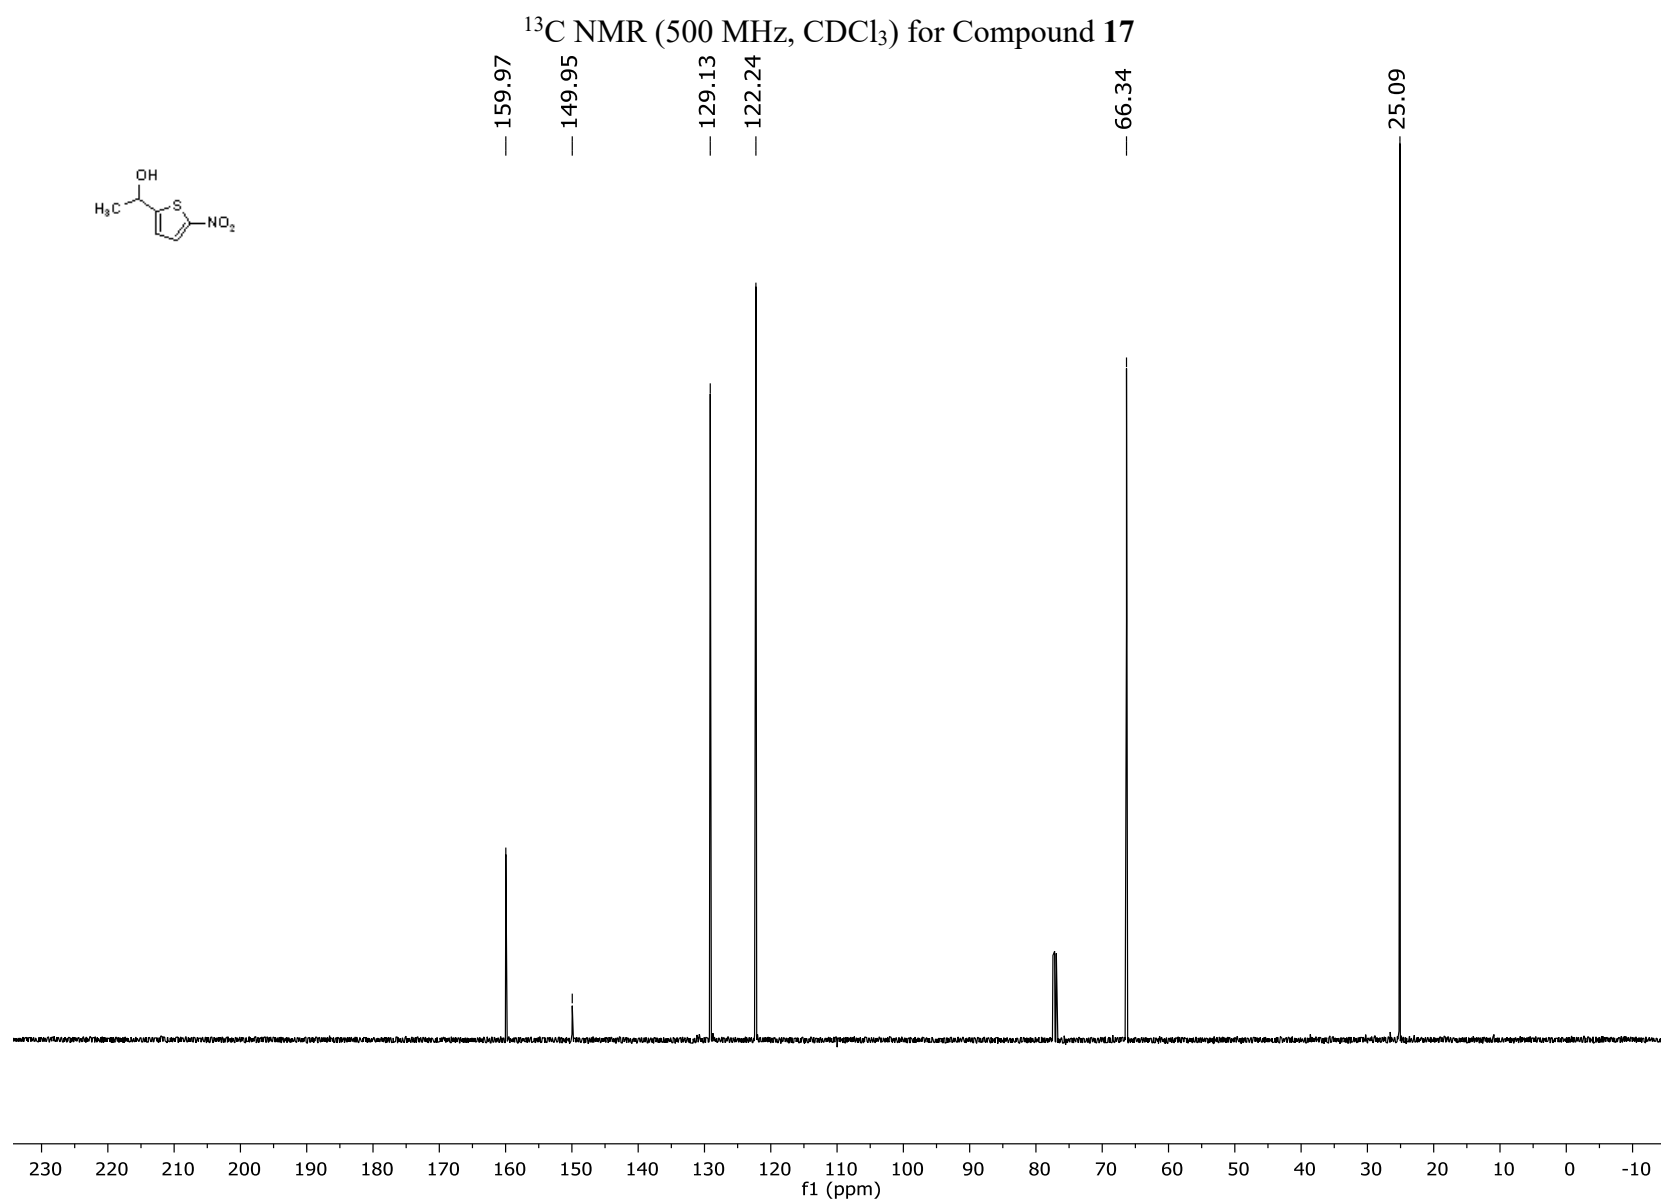

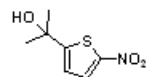

$^1\text{H}$  NMR (500 MHz,  $\text{CDCl}_3$ ) for Compound **19**

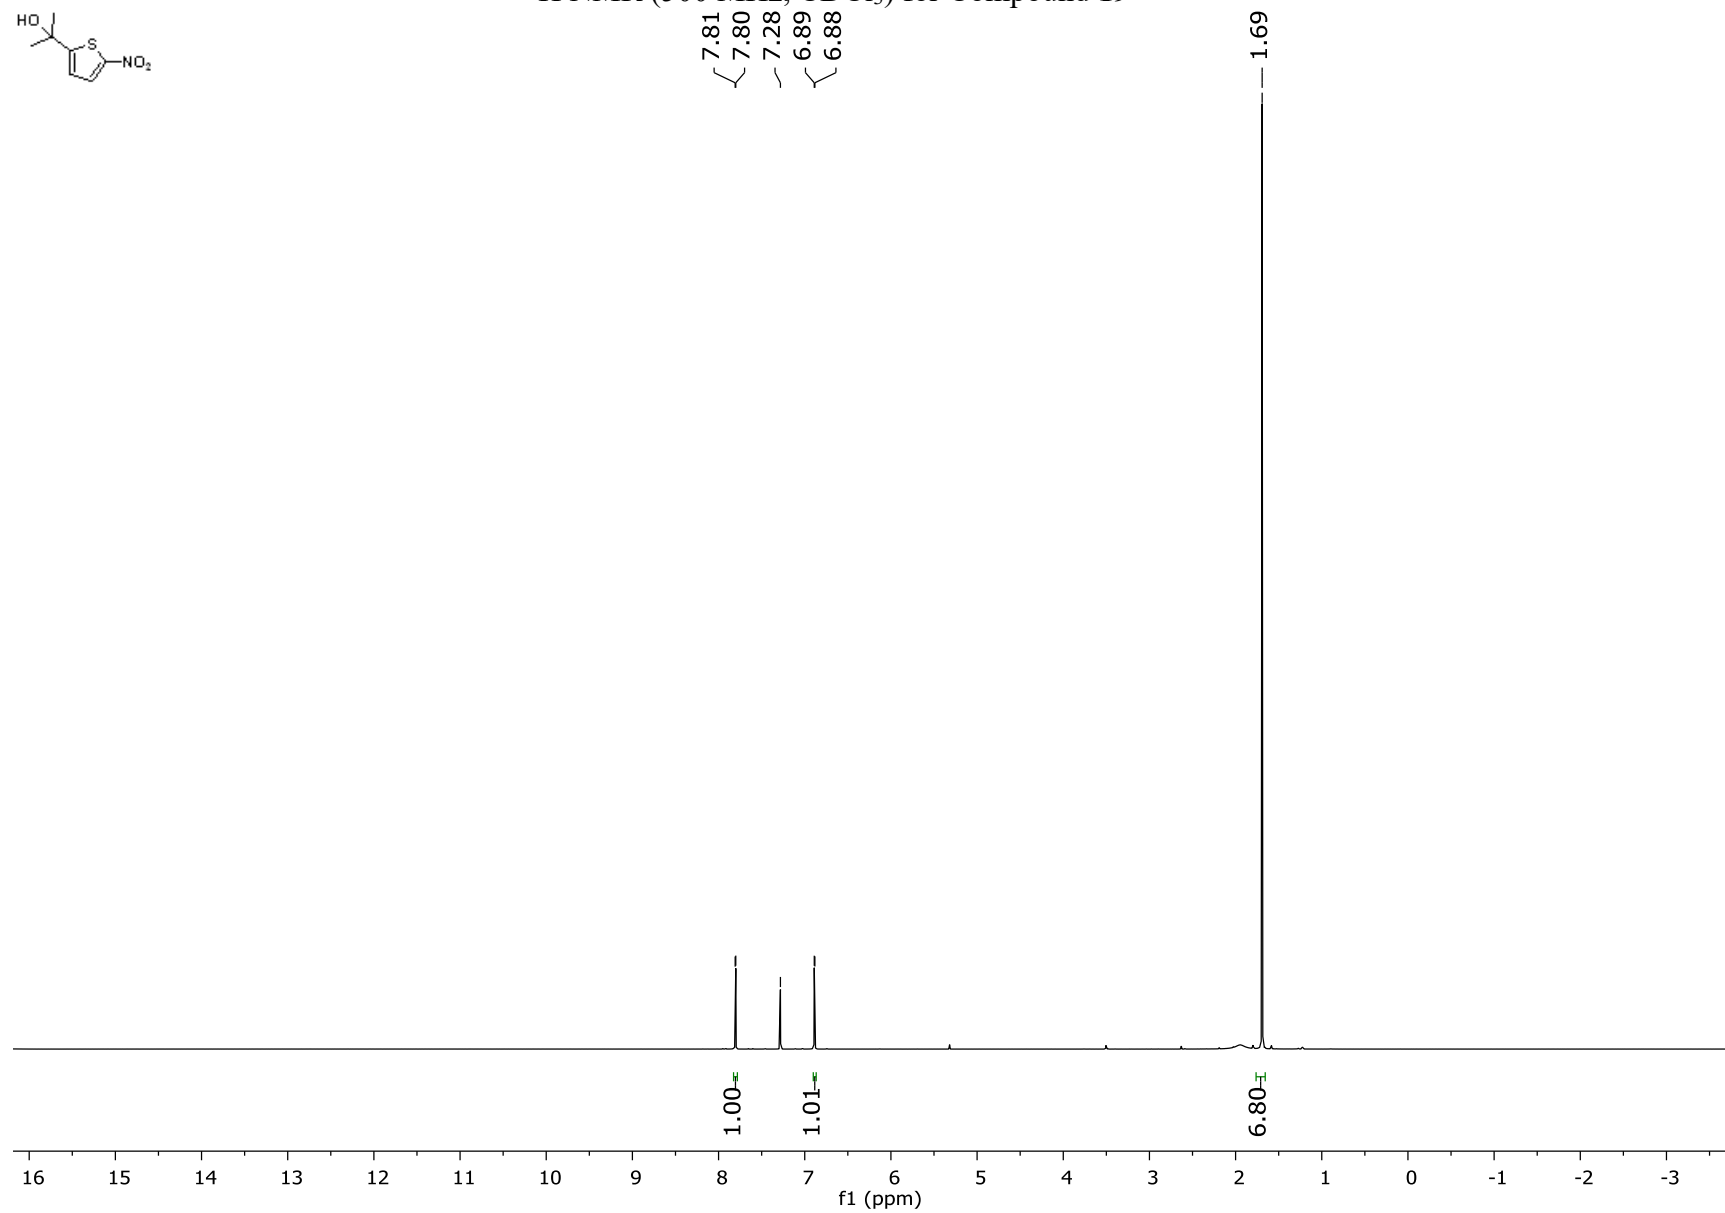

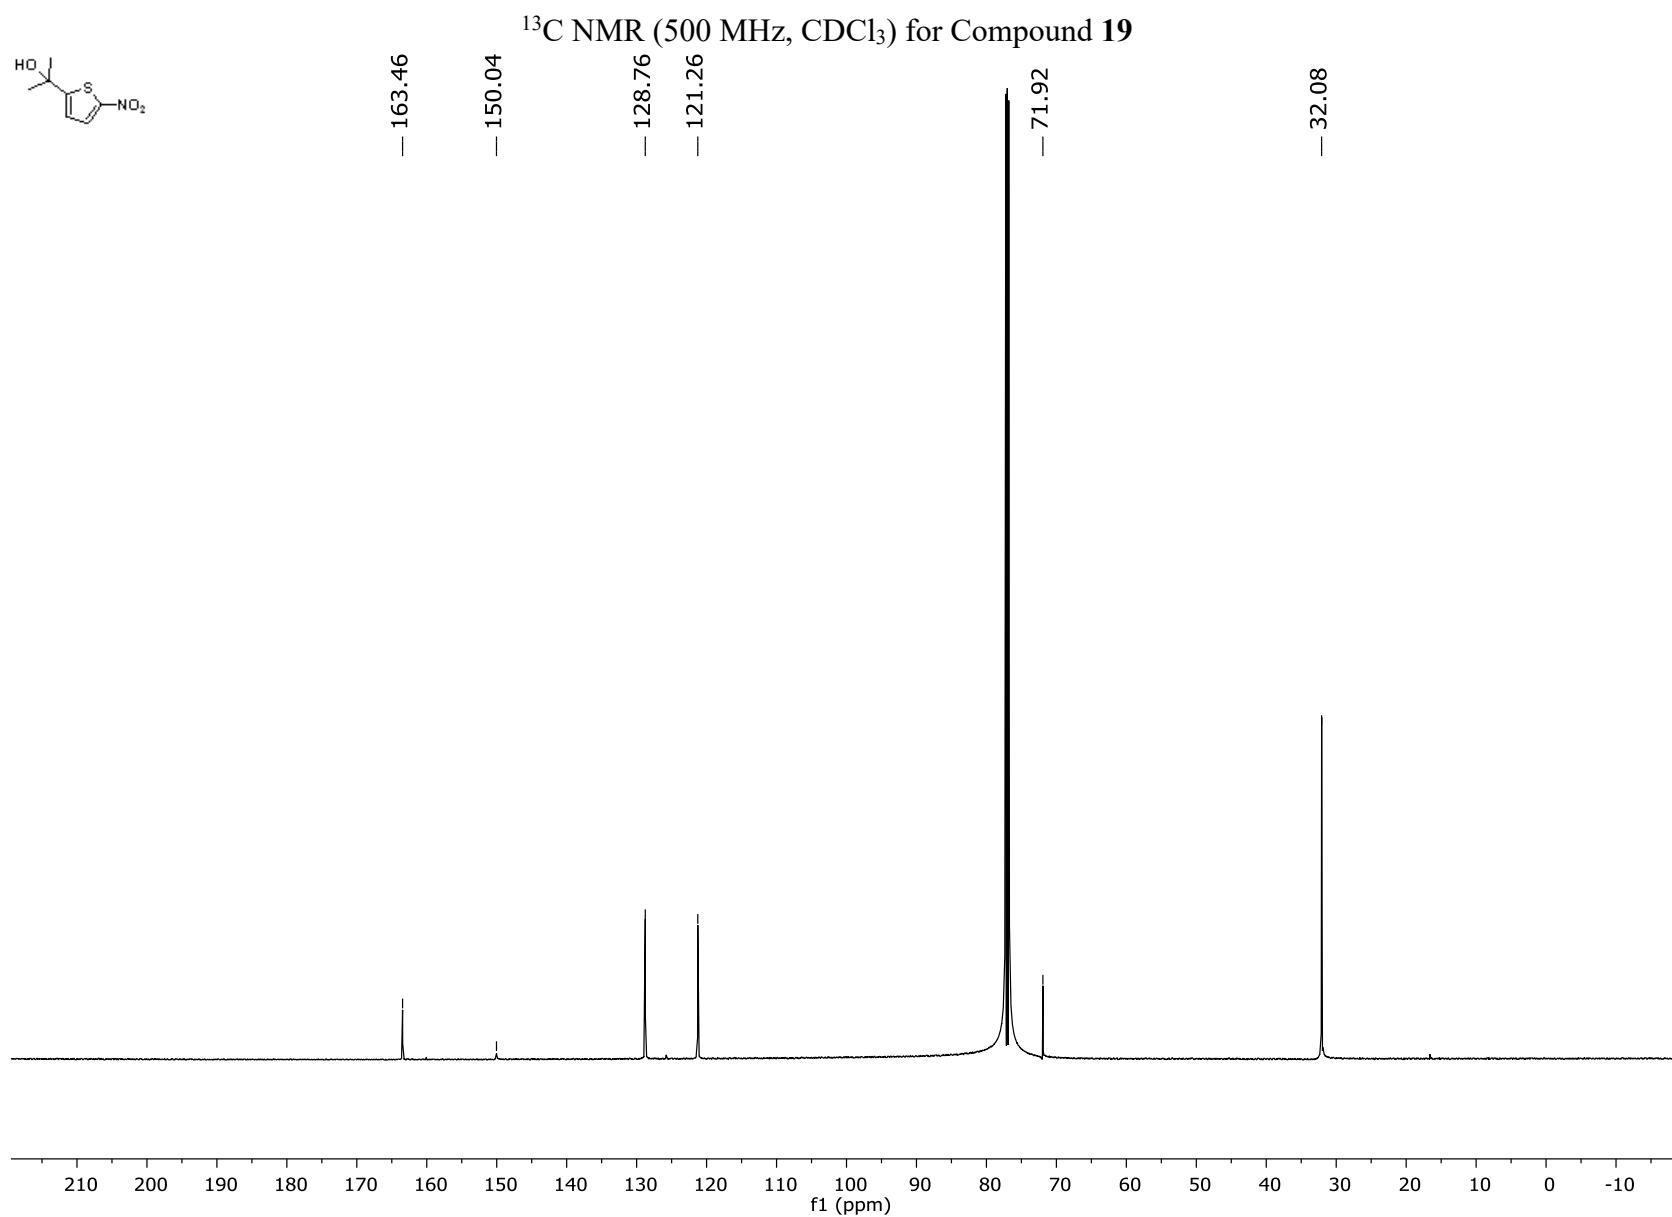

<sup>1</sup>H NMR (500 MHz, CDCl<sub>3</sub>) for Compound **20**

7.851  
7.834  
7.327  
7.311  
7.260  
7.049  
7.031  
6.574  
6.467  
6.285  
6.268  
3.827  
3.677  
3.524  
2.452

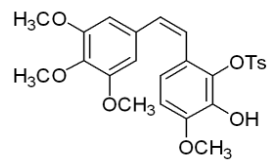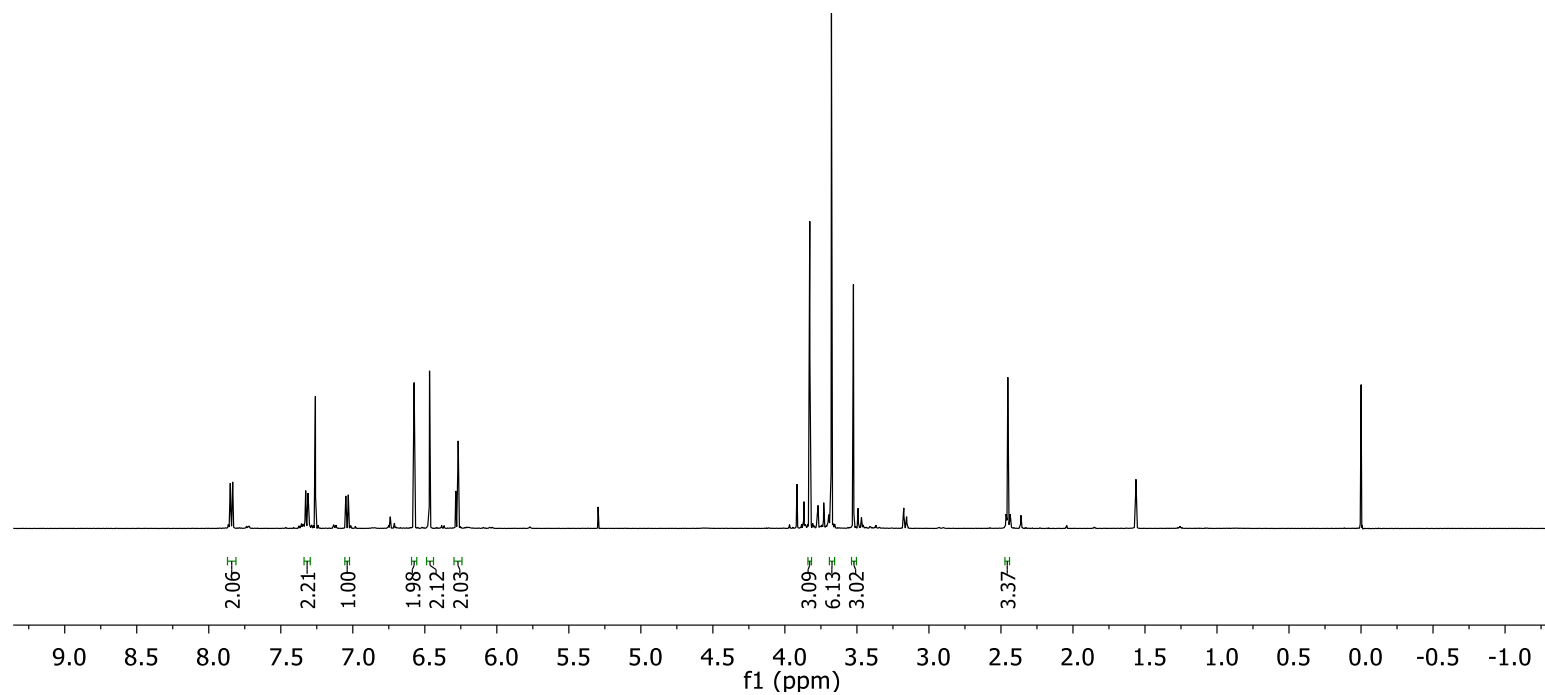

$^{13}\text{C}$  NMR (125 MHz,  $\text{CDCl}_3$ ) for Compound **20**

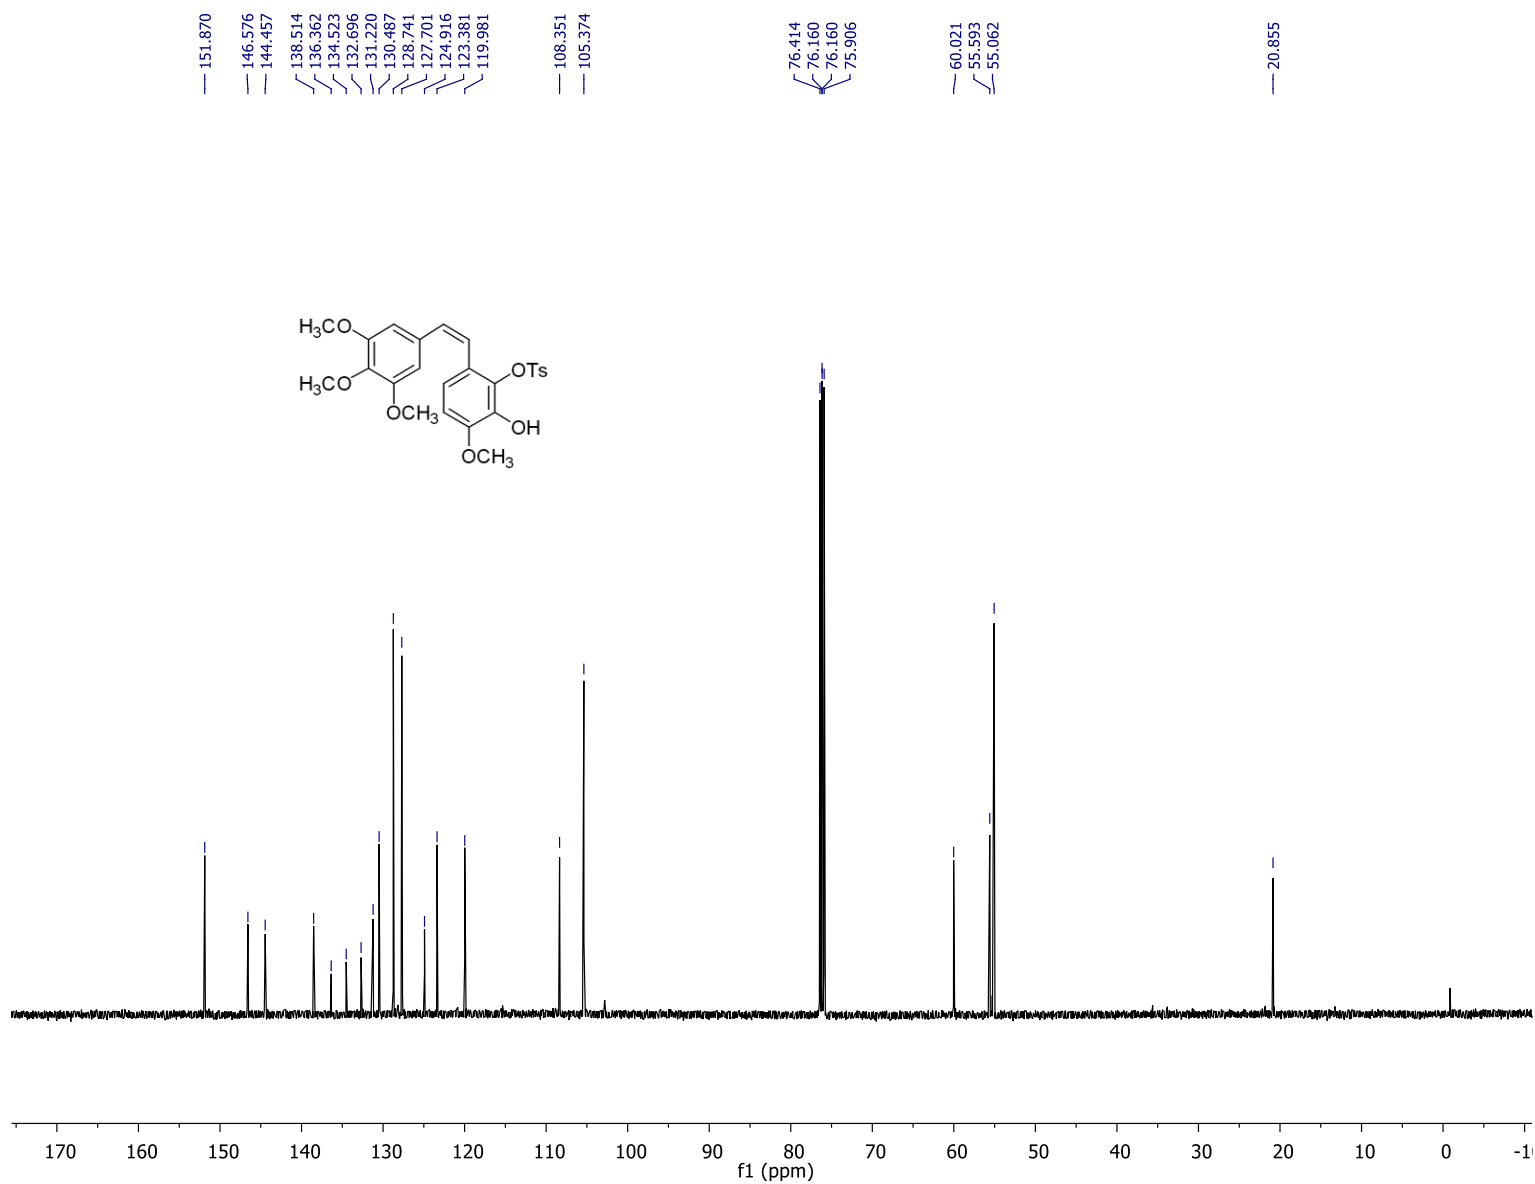

<sup>1</sup>H NMR (500 MHz, CDCl<sub>3</sub>) for Compound **21**

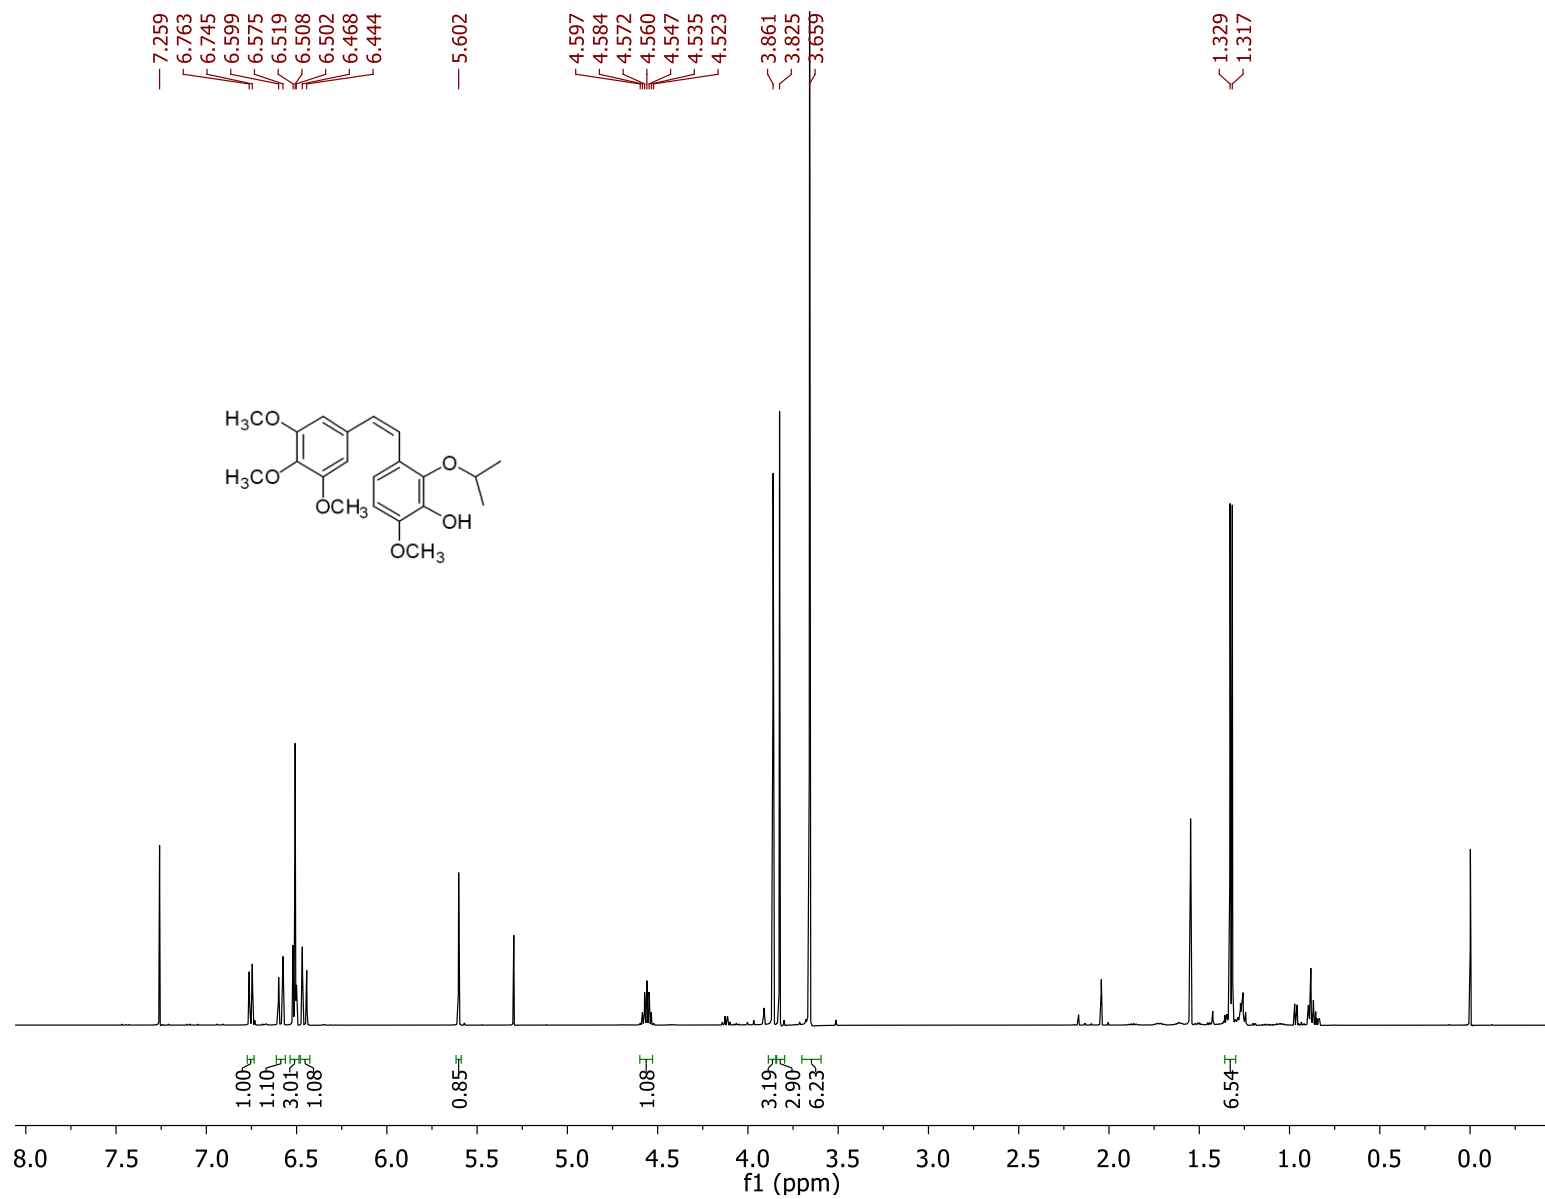

<sup>13</sup>C NMR (125 MHz, CDCl<sub>3</sub>) for Compound **21**

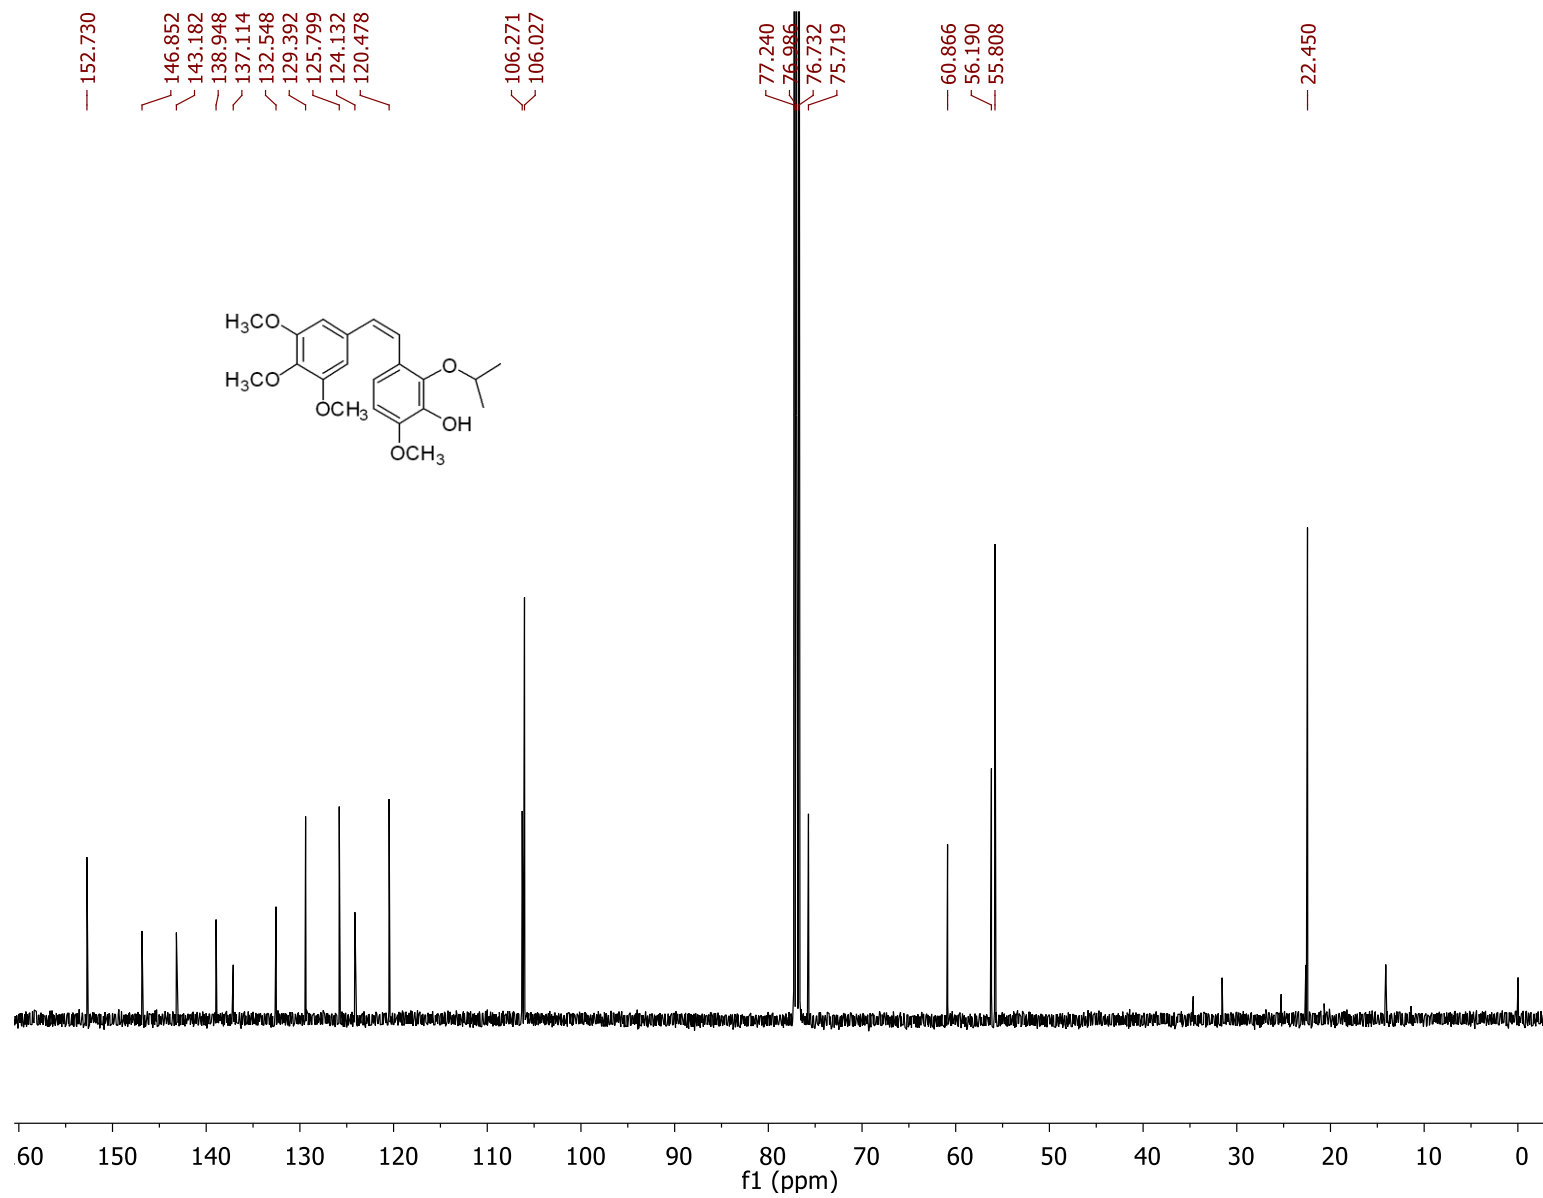

## HPLC trace of Compound 21

Data File C:\CHEM32\1\DATA\LAXMAN\LD-V-11-1A\LDV-11-1ARUN001.D

Sample Name: LD-V-11-1A-run1

```
=====
Acq. Operator   : Laxman
Acq. Instrument : Instrument 1           Location :   -
Injection Date  : 2/4/2014 12:51:42 PM
Acq. Method     : C:\CHEM32\1\METHODS\MASTERMETHOD.M
Last changed    : 2/4/2014 12:46:52 PM by Laxman
Analysis Method : C:\CHEM32\1\DATA\LAXMAN\LD-V-11-1A\LDV-11-1ARUN001.D\DA.M (MASTERMETHOD.M)
Last changed    : 2/4/2014 2:30:02 PM by Laxman
Sample Info     : run1
```

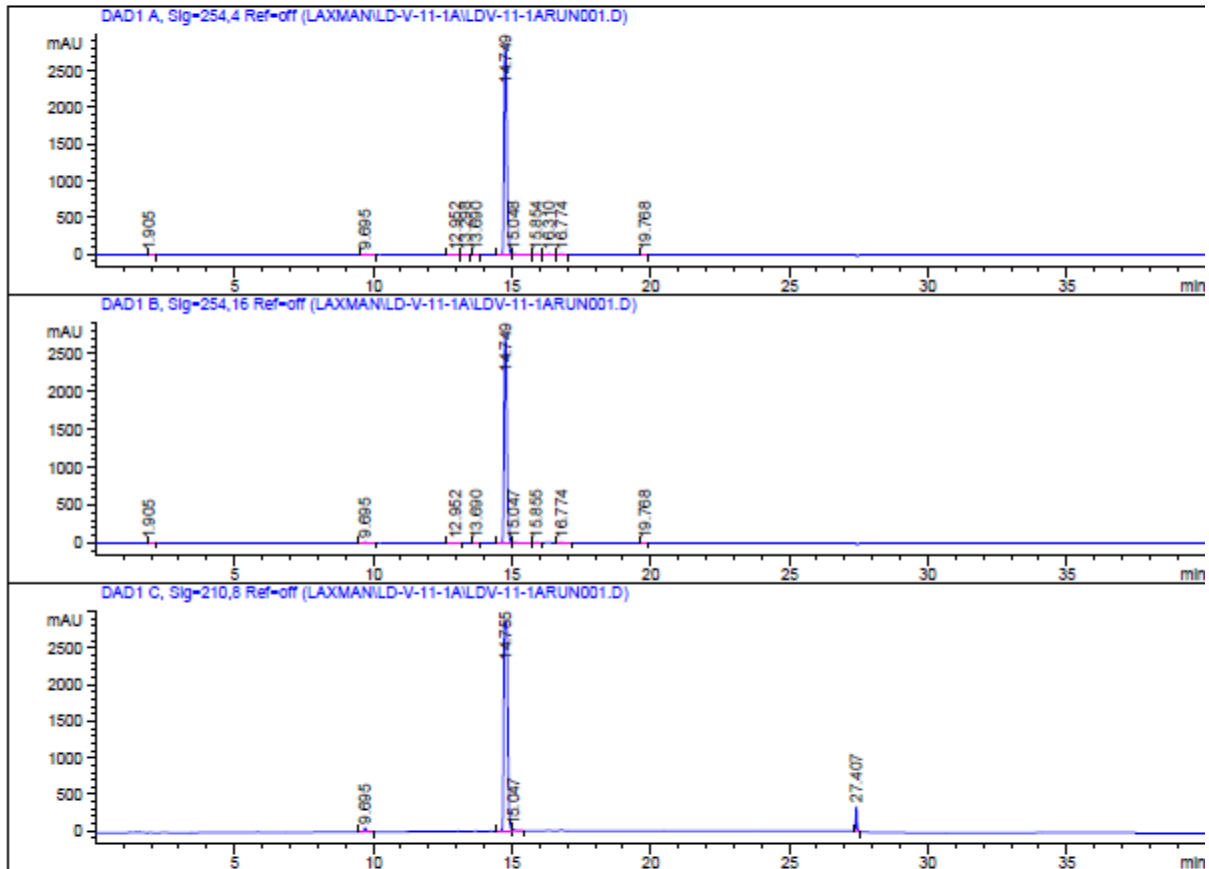

Data File C:\CHEM32\1\DATA\LAXMAN\LD-V-11-1A\LDV-11-1ARUN001.D  
Sample Name: LD-V-11-1A-run1

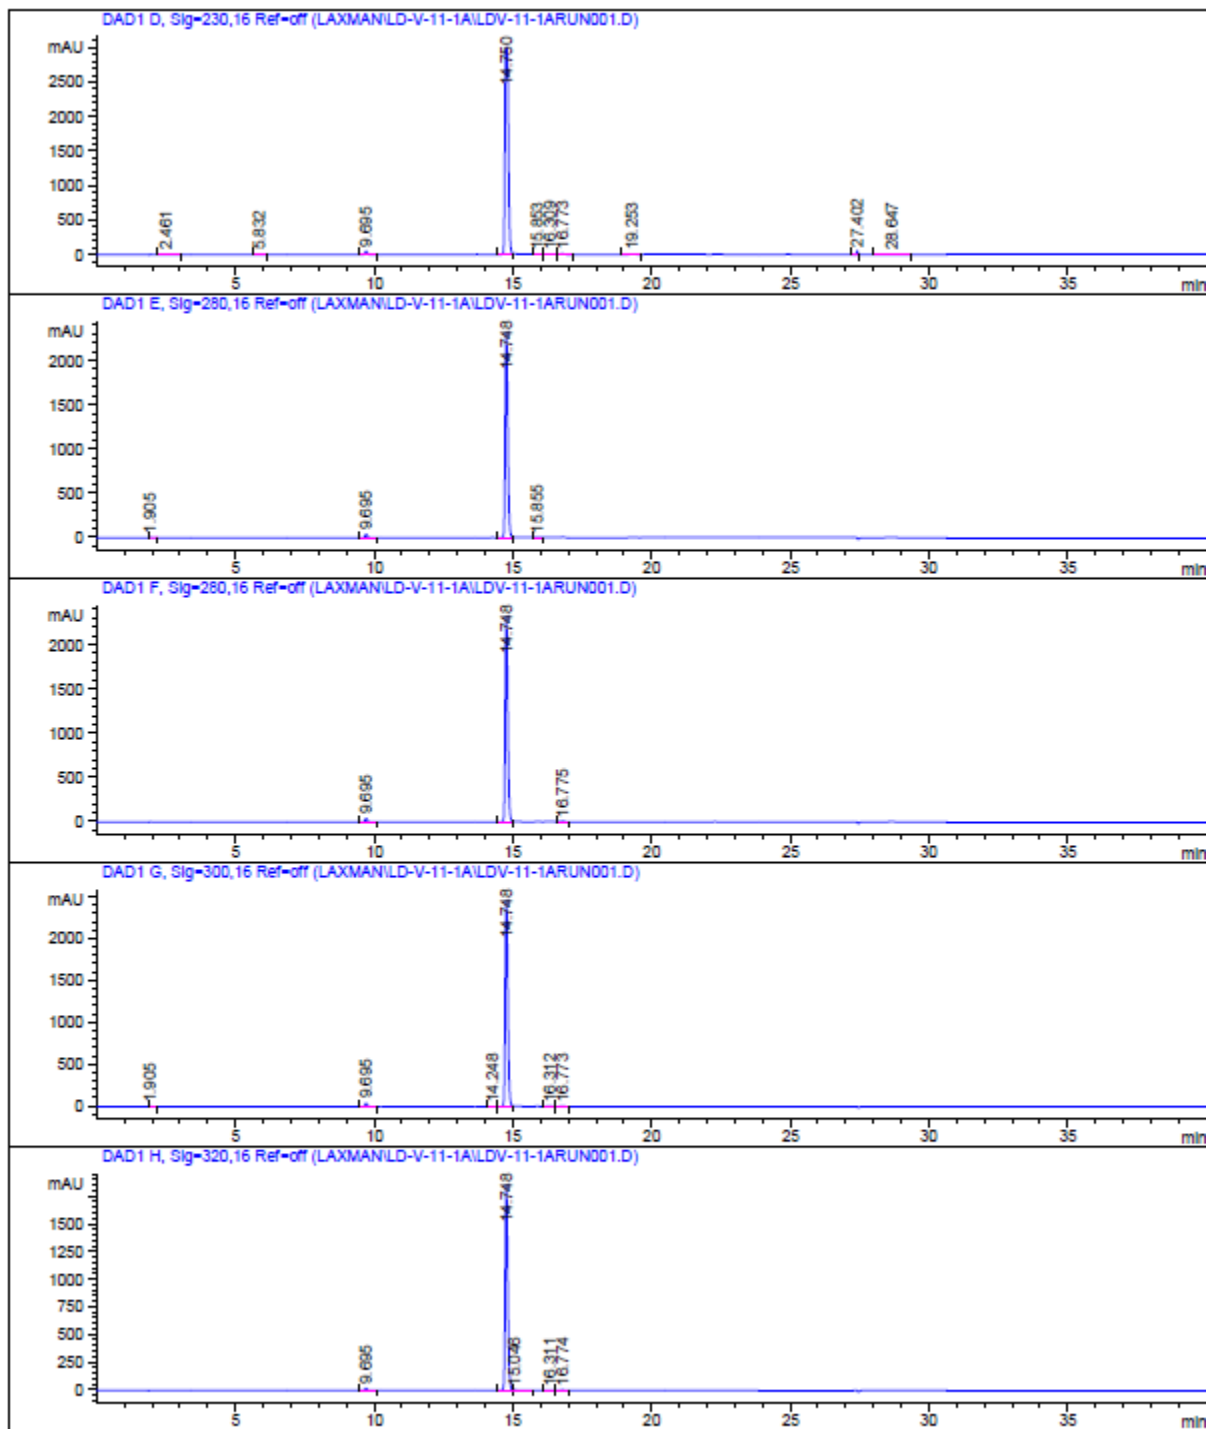

Data File C:\CHEM32\1\DATA\LAXMAN\LD-V-11-1A\LDV-11-1A\RUN001.D  
Sample Name: LD-V-11-1A-run1

Area Percent Report

Sorted By : Signal  
Multiplier : 1.0000  
Dilution : 1.0000  
Use Multiplier & Dilution Factor with ISTDs

Signal 1: DAD1 A, Sig=254,4 Ref=off

| Peak # | RetTime [min] | Type | Width [min] | Area [mAU*s] | Height [mAU] | Area %  |
|--------|---------------|------|-------------|--------------|--------------|---------|
| 1      | 1.905         | BB   | 0.1050      | 63.49230     | 8.32688      | 0.3077  |
| 2      | 9.695         | BB   | 0.0838      | 39.29815     | 7.18572      | 0.1905  |
| 3      | 12.952        | BV   | 0.1532      | 21.31435     | 1.92459      | 0.1033  |
| 4      | 13.298        | VB   | 0.1364      | 20.15860     | 2.21022      | 0.0977  |
| 5      | 13.690        | BB   | 0.0898      | 6.70567      | 1.15370      | 0.0325  |
| 6      | 14.749        | BV   | 0.1128      | 2.02511e4    | 2852.08301   | 98.1487 |
| 7      | 15.048        | VB   | 0.1430      | 86.96108     | 8.25082      | 0.4215  |
| 8      | 15.854        | BV   | 0.1257      | 47.48036     | 5.67062      | 0.2301  |
| 9      | 16.310        | VB   | 0.1784      | 36.28421     | 2.81407      | 0.1759  |
| 10     | 16.774        | BB   | 0.1202      | 53.41854     | 6.91010      | 0.2589  |
| 11     | 19.768        | BB   | 0.0976      | 6.86424      | 1.08825      | 0.0333  |

Totals : 2.06331e4 2897.61796

Signal 2: DAD1 B, Sig=254,16 Ref=off

| Peak # | RetTime [min] | Type | Width [min] | Area [mAU*s] | Height [mAU] | Area %  |
|--------|---------------|------|-------------|--------------|--------------|---------|
| 1      | 1.905         | BB   | 0.1050      | 62.44164     | 8.18640      | 0.3122  |
| 2      | 9.695         | BB   | 0.0836      | 61.18841     | 11.22495     | 0.3060  |
| 3      | 12.952        | BV   | 0.1563      | 20.12209     | 1.77477      | 0.1006  |
| 4      | 13.690        | BB   | 0.0892      | 6.66208      | 1.15644      | 0.0333  |
| 5      | 14.749        | BV   | 0.1127      | 1.96340e4    | 2770.85913   | 98.1825 |
| 6      | 15.047        | VB   | 0.1425      | 84.68669     | 8.06554      | 0.4235  |
| 7      | 15.855        | BV   | 0.1314      | 54.17786     | 6.11229      | 0.2709  |
| 8      | 16.774        | VB   | 0.1354      | 67.86295     | 7.50964      | 0.3394  |
| 9      | 19.768        | BB   | 0.0975      | 6.31473      | 1.00224      | 0.0316  |

Totals : 1.99975e4 2815.89140

Data File C:\CHEM32\1\DATA\LAXMAN\LD-V-11-1A\LDV-11-1ARUN001.D  
Sample Name: LD-V-11-1A-run1

Signal 3: DAD1 C, Sig=210,8 Ref=off

| Peak # | RetTime [min] | Type | Width [min] | Area [mAU*s] | Height [mAU] | Area %  |
|--------|---------------|------|-------------|--------------|--------------|---------|
| 1      | 9.695         | BB   | 0.0833      | 279.00644    | 51.44276     | 0.9452  |
| 2      | 14.755        | BV   | 0.1586      | 2.80721e4    | 2658.40137   | 95.1058 |
| 3      | 15.047        | VB   | 0.1125      | 153.97672    | 19.41314     | 0.5217  |
| 4      | 27.407        | BB   | 0.0490      | 1011.62750   | 337.22437    | 3.4273  |

Totals : 2.95167e4 3266.48163

Signal 4: DAD1 D, Sig=230,16 Ref=off

| Peak # | RetTime [min] | Type | Width [min] | Area [mAU*s] | Height [mAU] | Area %  |
|--------|---------------|------|-------------|--------------|--------------|---------|
| 1      | 2.461         | BB   | 0.1822      | 14.68391     | 1.06963      | 0.0556  |
| 2      | 5.832         | BB   | 0.0800      | 11.26862     | 2.11878      | 0.0427  |
| 3      | 9.695         | BB   | 0.0838      | 260.12378    | 47.56544     | 0.9848  |
| 4      | 14.750        | BV   | 0.1376      | 2.56213e4    | 3001.83618   | 96.9993 |
| 5      | 15.853        | BB   | 0.1186      | 20.32653     | 2.61849      | 0.0770  |
| 6      | 16.309        | BV   | 0.2044      | 92.46318     | 6.11626      | 0.3501  |
| 7      | 16.773        | VB   | 0.1353      | 111.28555    | 12.33039     | 0.4213  |
| 8      | 19.253        | BB   | 0.1732      | 14.00256     | 1.08039      | 0.0530  |
| 9      | 27.402        | BB   | 0.0492      | 191.40921    | 60.00833     | 0.7247  |
| 10     | 28.647        | BB   | 0.4277      | 77.03762     | 2.63050      | 0.2917  |

Totals : 2.64139e4 3137.37440

Signal 5: DAD1 E, Sig=280,16 Ref=off

| Peak # | RetTime [min] | Type | Width [min] | Area [mAU*s] | Height [mAU] | Area %  |
|--------|---------------|------|-------------|--------------|--------------|---------|
| 1      | 1.905         | BB   | 0.1052      | 49.02067     | 6.41397      | 0.3222  |
| 2      | 9.695         | BB   | 0.0835      | 215.97261    | 39.69125     | 1.4193  |
| 3      | 14.748        | VV   | 0.0984      | 1.49142e4    | 2339.12183   | 98.0145 |
| 4      | 15.855        | BV   | 0.1255      | 37.12501     | 4.44043      | 0.2440  |

Totals : 1.52163e4 2389.66748

Data File C:\CHEM32\1\DATA\LAXMAN\LD-V-11-1A\LDV-11-1ARUN001.D  
Sample Name: LD-V-11-1A-run1

Signal 6: DAD1 F, Sig=280,16 Ref=off

| Peak #   | RetTime [min] | Type | Width [min] | Area [mAU*s] | Height [mAU] | Area %  |
|----------|---------------|------|-------------|--------------|--------------|---------|
| 1        | 9.695         | BB   | 0.0835      | 215.97261    | 39.69125     | 1.4225  |
| 2        | 14.748        | VV   | 0.0984      | 1.49142e4    | 2339.12183   | 98.2322 |
| 3        | 16.775        | BB   | 0.1217      | 52.42577     | 6.66968      | 0.3453  |
| Totals : |               |      |             | 1.51826e4    | 2385.48276   |         |

Signal 7: DAD1 G, Sig=300,16 Ref=off

| Peak #   | RetTime [min] | Type | Width [min] | Area [mAU*s] | Height [mAU] | Area %  |
|----------|---------------|------|-------------|--------------|--------------|---------|
| 1        | 1.905         | BB   | 0.1016      | 36.36117     | 4.95634      | 0.2178  |
| 2        | 9.695         | BB   | 0.0835      | 209.04446    | 38.38157     | 1.2521  |
| 3        | 14.248        | BB   | 0.1195      | 9.78438      | 1.27535      | 0.0586  |
| 4        | 14.748        | BV   | 0.1033      | 1.63664e4    | 2471.26636   | 98.0315 |
| 5        | 16.312        | BB   | 0.1665      | 21.17754     | 1.75824      | 0.1268  |
| 6        | 16.773        | BB   | 0.1221      | 52.27137     | 6.61828      | 0.3131  |
| Totals : |               |      |             | 1.66951e4    | 2524.25614   |         |

Signal 8: DAD1 H, Sig=320,16 Ref=off

| Peak #   | RetTime [min] | Type | Width [min] | Area [mAU*s] | Height [mAU] | Area %  |
|----------|---------------|------|-------------|--------------|--------------|---------|
| 1        | 9.695         | BB   | 0.0836      | 103.53847    | 18.99932     | 0.8508  |
| 2        | 14.748        | BV   | 0.0987      | 1.19672e4    | 1867.92029   | 98.3422 |
| 3        | 15.046        | VV   | 0.1531      | 53.64690     | 4.63198      | 0.4409  |
| 4        | 16.311        | BB   | 0.1646      | 11.93031     | 1.00390      | 0.0980  |
| 5        | 16.774        | BB   | 0.1222      | 32.61986     | 4.12577      | 0.2681  |
| Totals : |               |      |             | 1.21689e4    | 1896.68126   |         |

\*\*\* End of Report \*\*\*

# HRMS Traces of Compound 21

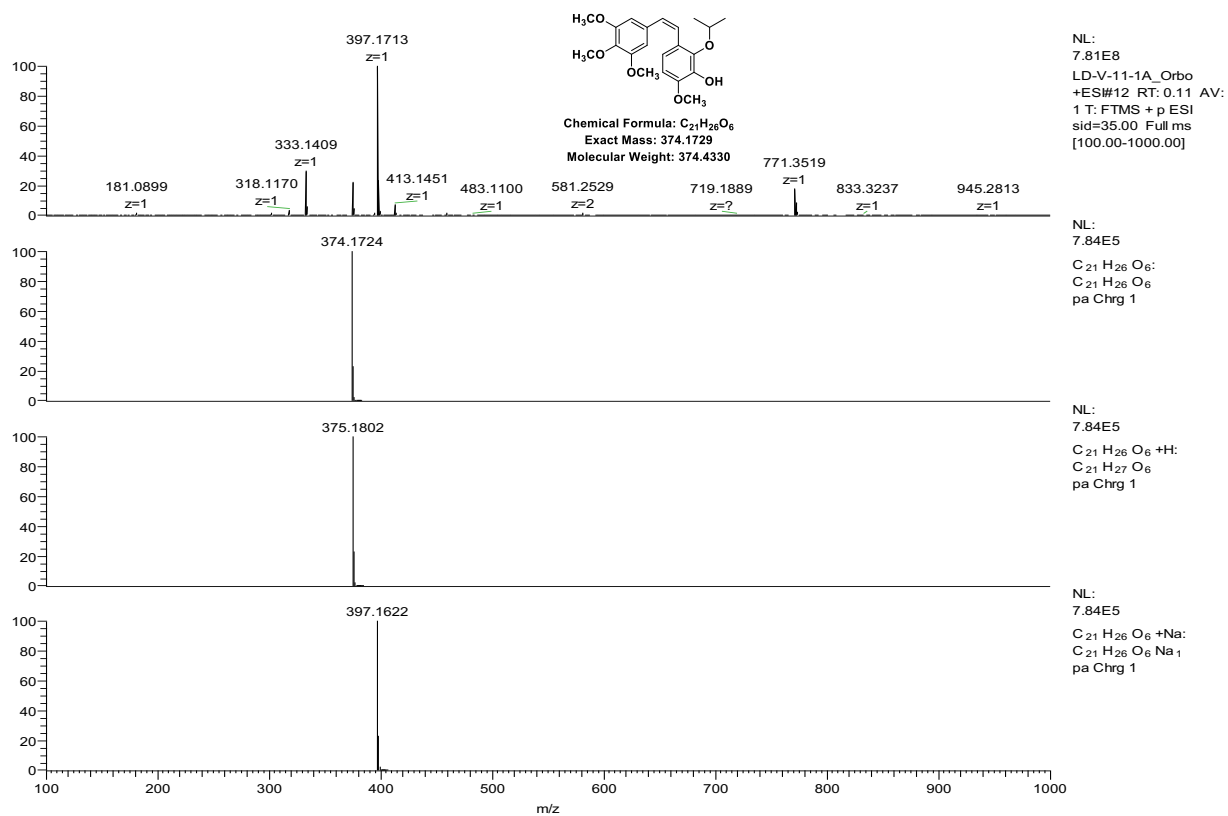

<sup>1</sup>H NMR (600 MHz, CDCl<sub>3</sub>) for Compound **22**

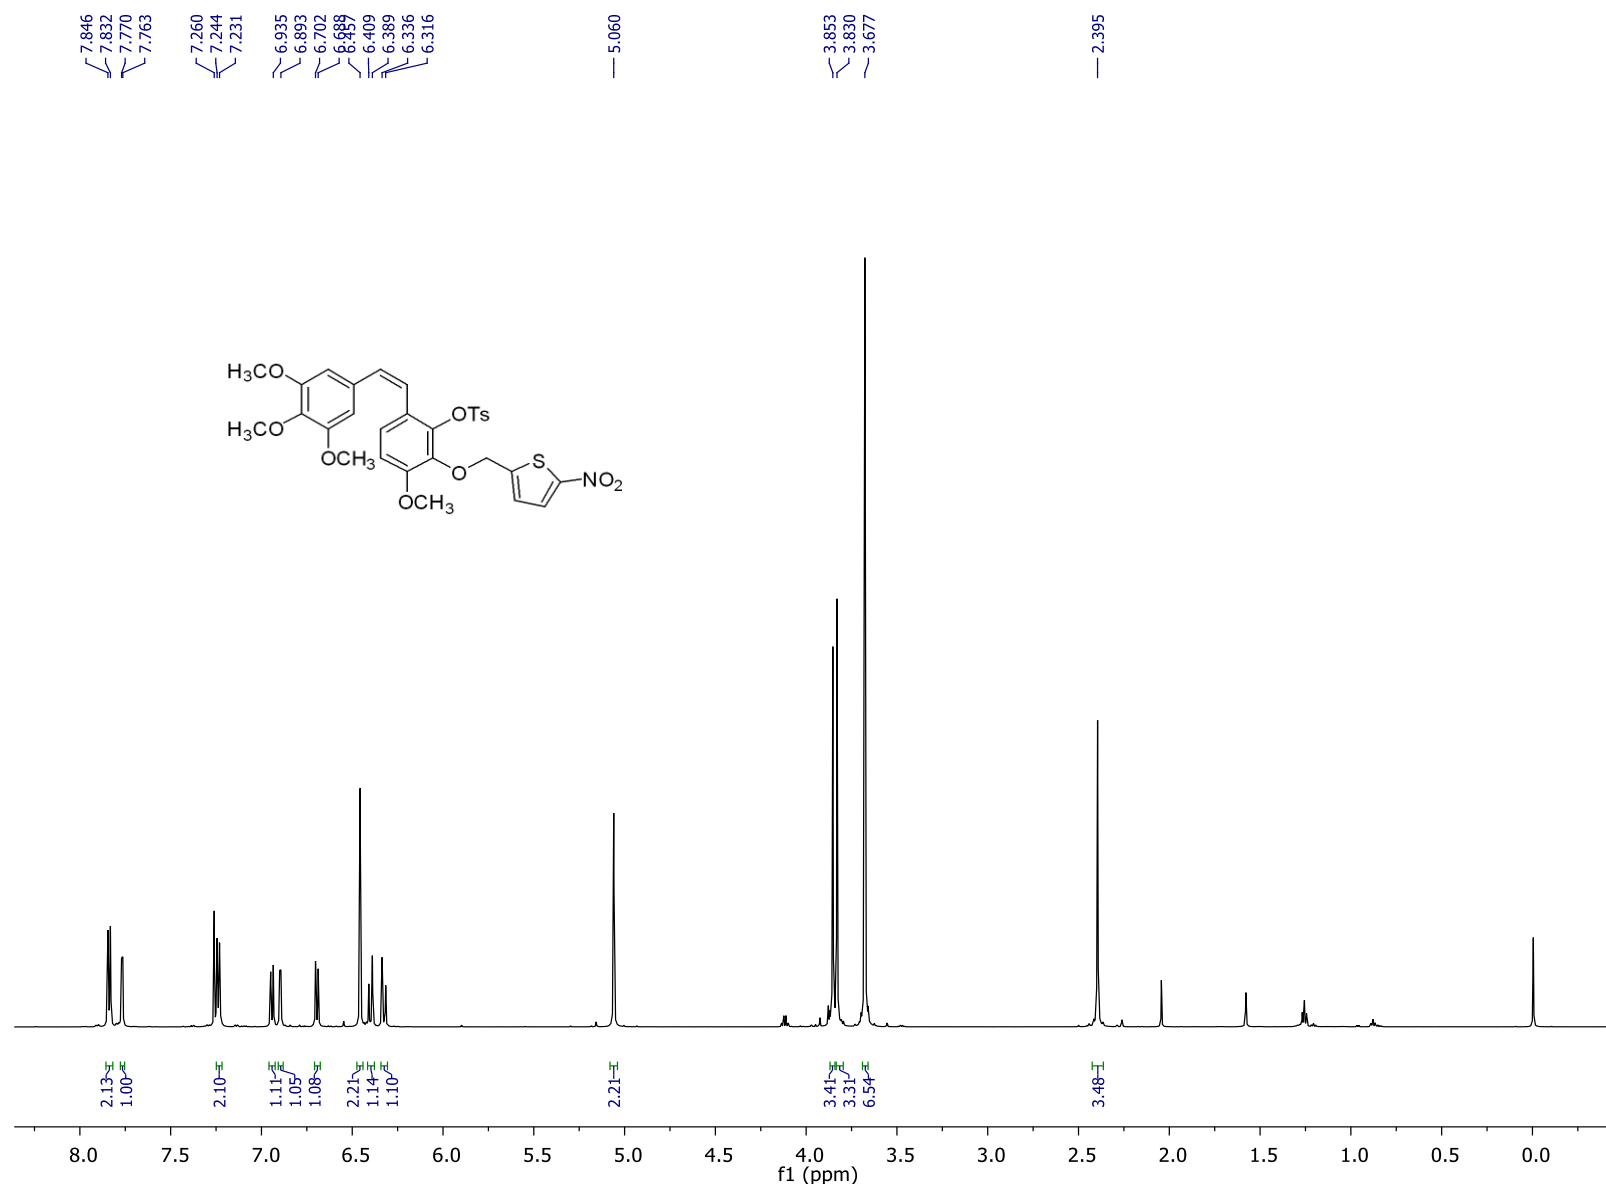

<sup>13</sup>C NMR (151 MHz, CDCl<sub>3</sub>) for Compound **22**

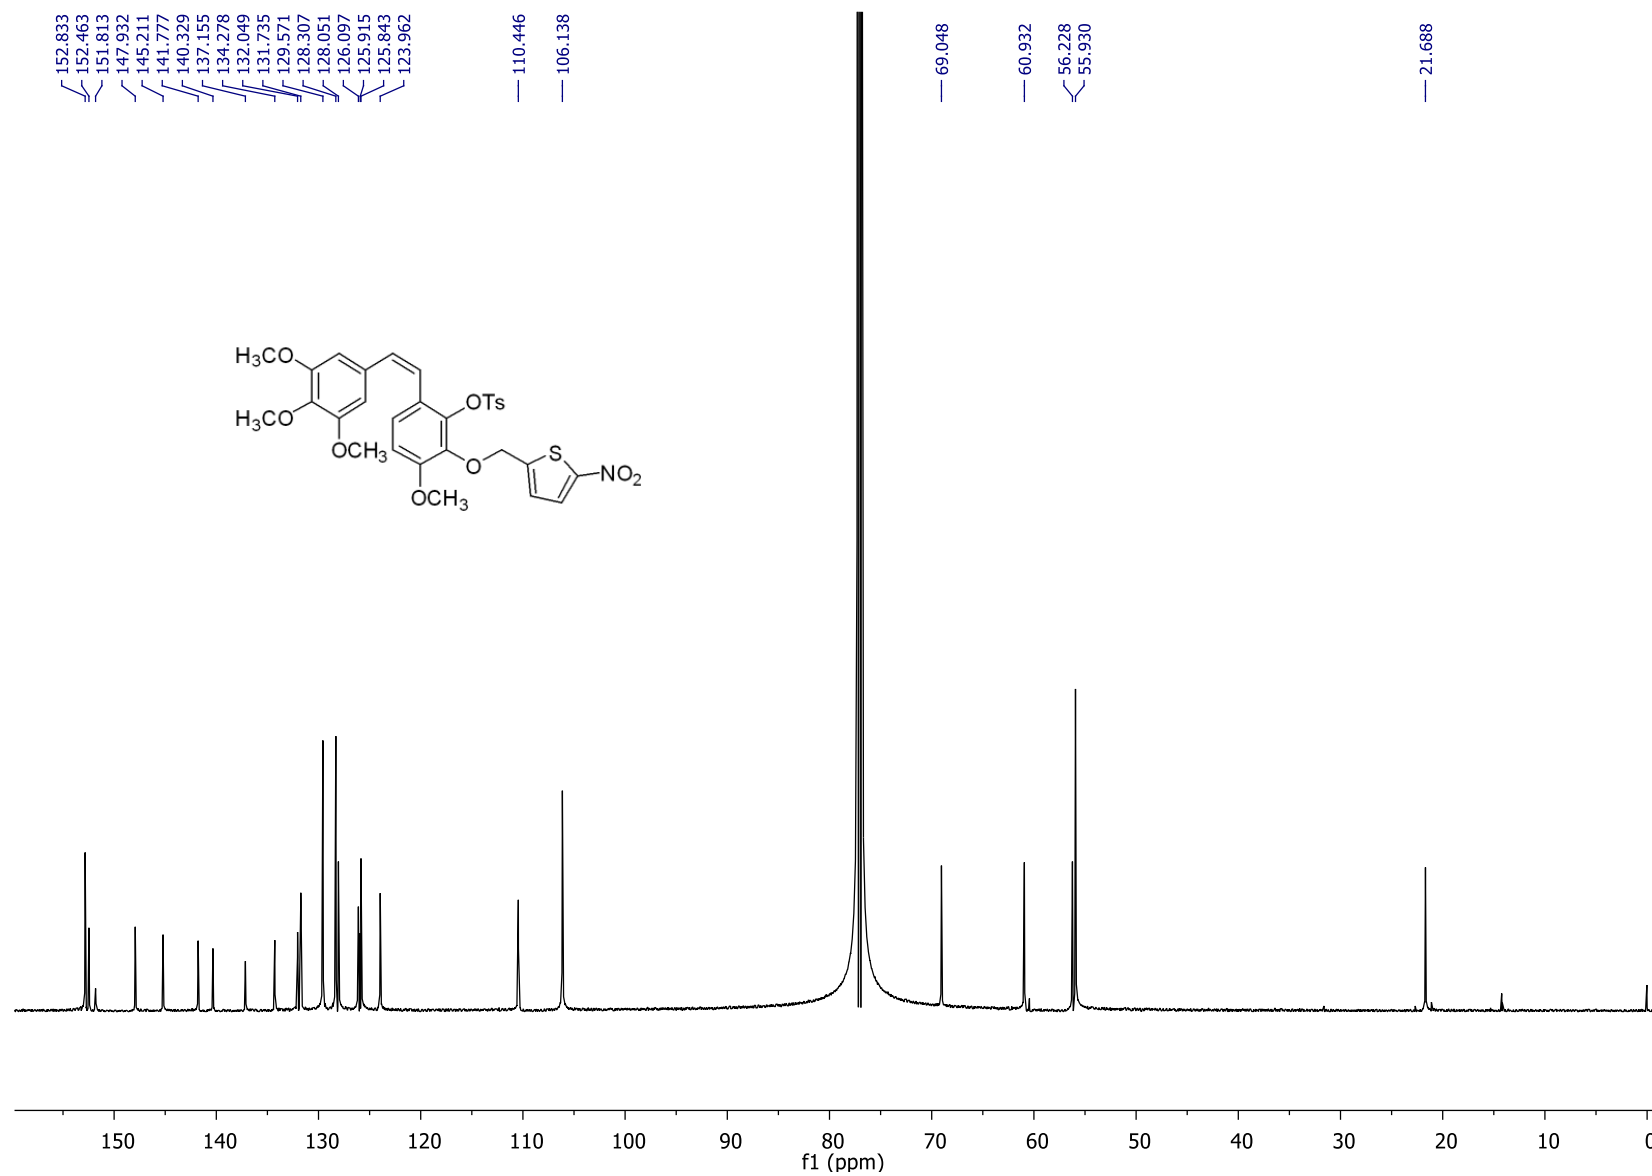

## HPLC Traces of Compound 22

Data File C:\CHEM32\1\DATA\LAXMAN\LD-III-43-1A-RERUN\III-43-RUN10002.D

Sample Name: LD-III-43-1A-rerun-run1

```
=====
Acq. Operator   : Laxman
Acq. Instrument : Instrument 1          Location : -
Injection Date  : 2/20/2013 10:40:08 AM
Acq. Method     : C:\CHEM32\1\METHODS\MASTERMETHOD.M
Last changed    : 2/20/2013 10:20:33 AM by Laxman
Analysis Method : C:\CHEM32\1\DATA\LAXMAN\LD-III-43-1A-RERUN\III-43-RUN10002.D\DA.M (
                  MASTERMETHOD.M)
Last changed    : 2/20/2013 1:53:17 PM by Laxman
                  (modified after loading)
Sample Info     : run1
                  10%ACN/H2O
```

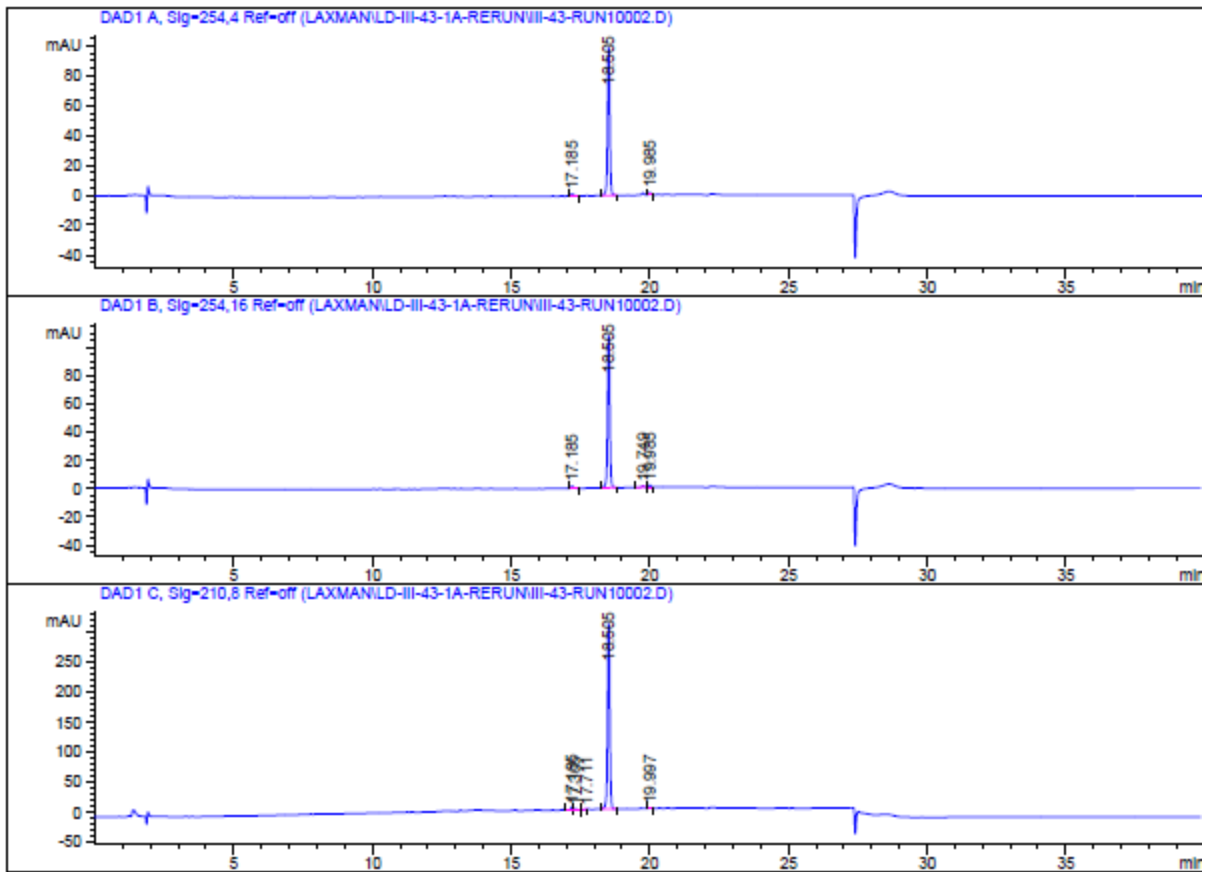

Data File C:\CHEM32\1\DATA\LAXMAN\LD-III-43-1A-RERUN\III-43-RUN10002.D  
Sample Name: LD-III-43-1A-rerun-run1

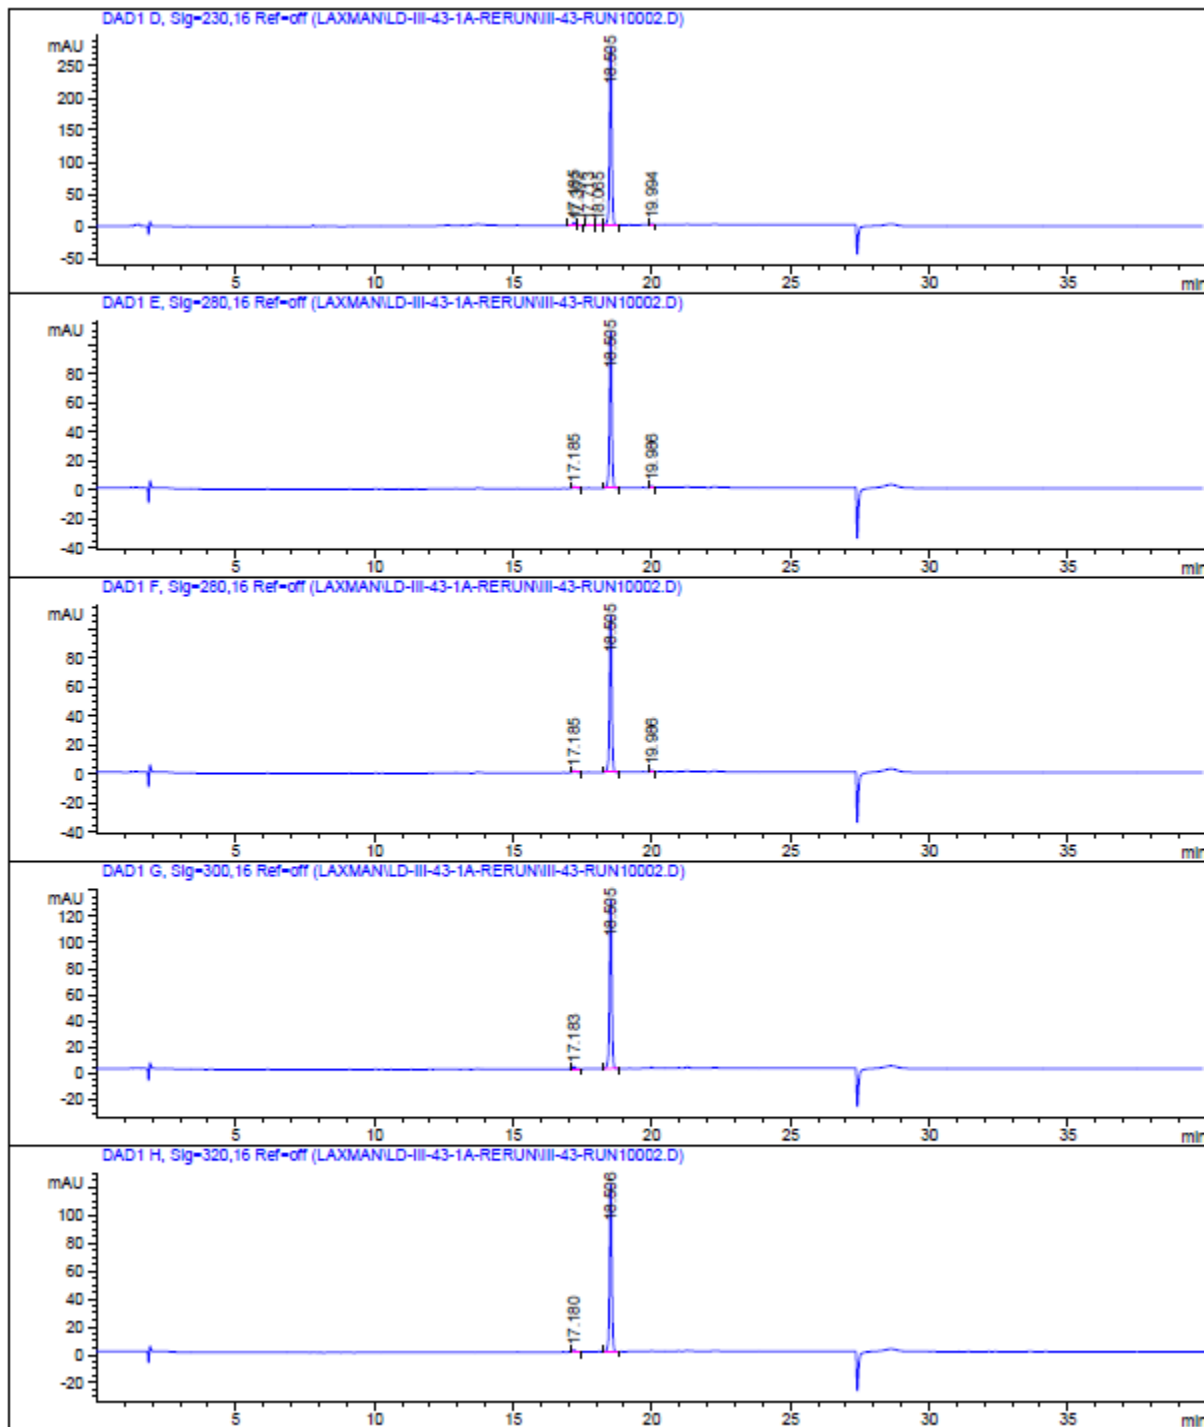

Data File C:\CHEM32\1\DATA\LAXMAN\LD-III-43-1A-RERUN\III-43-RUN10002.D  
Sample Name: LD-III-43-1A-rerun-run1

Area Percent Report

Sorted By : Signal  
Multiplier : 1.0000  
Dilution : 1.0000  
Use Multiplier & Dilution Factor with ISTDs

Signal 1: DAD1 A, Sig=254,4 Ref=off

| Peak # | RetTime [min] | Type | Width [min] | Area [mAU*s] | Height [mAU] | Area %  |
|--------|---------------|------|-------------|--------------|--------------|---------|
| 1      | 17.185        | BB   | 0.0973      | 9.40742      | 1.41932      | 1.6521  |
| 2      | 18.505        | BB   | 0.0847      | 552.32959    | 99.64810     | 96.9969 |
| 3      | 19.985        | BB   | 0.0787      | 7.69327      | 1.52861      | 1.3510  |

Totals : 569.43028 102.59603

Signal 2: DAD1 B, Sig=254,16 Ref=off

| Peak # | RetTime [min] | Type | Width [min] | Area [mAU*s] | Height [mAU] | Area %  |
|--------|---------------|------|-------------|--------------|--------------|---------|
| 1      | 17.185        | BB   | 0.0975      | 10.34489     | 1.55665      | 1.6471  |
| 2      | 18.505        | BB   | 0.0846      | 601.68658    | 108.63660    | 95.8011 |
| 3      | 19.749        | BB   | 0.0994      | 8.24213      | 1.21077      | 1.3123  |
| 4      | 19.985        | BB   | 0.0792      | 7.78437      | 1.53429      | 1.2394  |

Totals : 628.05797 112.93830

Signal 3: DAD1 C, Sig=210,8 Ref=off

| Peak # | RetTime [min] | Type | Width [min] | Area [mAU*s] | Height [mAU] | Area %  |
|--------|---------------|------|-------------|--------------|--------------|---------|
| 1      | 17.185        | VV   | 0.0913      | 30.09891     | 4.92847      | 1.6977  |
| 2      | 17.305        | VB   | 0.0784      | 7.90903      | 1.47888      | 0.4461  |
| 3      | 17.711        | BV   | 0.0716      | 5.09792      | 1.07028      | 0.2875  |
| 4      | 18.505        | VB   | 0.0846      | 1723.29053   | 311.30359    | 97.2001 |
| 5      | 19.997        | BB   | 0.0837      | 6.53474      | 1.23493      | 0.3686  |

Totals : 1772.93112 320.01615

Data File C:\CHEM32\1\DATA\LAXMAN\LD-III-43-1A-RERUN\III-43-RUN10002.D  
Sample Name: LD-III-43-1A-rerun-run1

Signal 4: DAD1 D, Sig=230,16 Ref=off

| Peak # | RetTime [min] | Type | Width [min] | Area [mAU*s] | Height [mAU] | Area %  |
|--------|---------------|------|-------------|--------------|--------------|---------|
| 1      | 17.185        | BV   | 0.0911      | 28.28330     | 4.63913      | 1.7630  |
| 2      | 17.302        | VB   | 0.0714      | 6.18744      | 1.25790      | 0.3857  |
| 3      | 17.713        | BV   | 0.1039      | 7.61578      | 1.03443      | 0.4747  |
| 4      | 18.065        | VV   | 0.1511      | 10.39987     | 1.01869      | 0.6482  |
| 5      | 18.505        | VB   | 0.0846      | 1544.25427   | 278.70560    | 96.2568 |
| 6      | 19.994        | BB   | 0.0834      | 7.56541      | 1.43652      | 0.4716  |

Totals : 1604.30607 288.09227

Signal 5: DAD1 E, Sig=280,16 Ref=off

| Peak # | RetTime [min] | Type | Width [min] | Area [mAU*s] | Height [mAU] | Area %  |
|--------|---------------|------|-------------|--------------|--------------|---------|
| 1      | 17.185        | BB   | 0.0998      | 9.16147      | 1.33870      | 1.4730  |
| 2      | 18.505        | BB   | 0.0851      | 607.04138    | 108.86829    | 97.6000 |
| 3      | 19.986        | BB   | 0.0793      | 5.76582      | 1.13497      | 0.9270  |

Totals : 621.96867 111.34196

Signal 6: DAD1 F, Sig=280,16 Ref=off

| Peak # | RetTime [min] | Type | Width [min] | Area [mAU*s] | Height [mAU] | Area %  |
|--------|---------------|------|-------------|--------------|--------------|---------|
| 1      | 17.185        | BB   | 0.0998      | 9.16147      | 1.33870      | 1.4730  |
| 2      | 18.505        | BB   | 0.0851      | 607.04138    | 108.86829    | 97.6000 |
| 3      | 19.986        | BB   | 0.0793      | 5.76582      | 1.13497      | 0.9270  |

Totals : 621.96867 111.34196

Signal 7: DAD1 G, Sig=300,16 Ref=off

| Peak # | RetTime [min] | Type | Width [min] | Area [mAU*s] | Height [mAU] | Area %  |
|--------|---------------|------|-------------|--------------|--------------|---------|
| 1      | 17.183        | BB   | 0.0982      | 10.97565     | 1.63835      | 1.4851  |
| 2      | 18.505        | BB   | 0.0854      | 728.06720    | 129.90228    | 98.5149 |

Totals : 739.04285 131.54064

Data File C:\CHEM32\1\DATA\LAXMAN\LD-III-43-1A-RERUN\III-43-RUN10002.D  
Sample Name: LD-III-43-1A-rerun-run1

Signal 8: DAD1 H, Sig=320,16 Ref=off

| Peak #   | RetTime [min] | Type | Width [min] | Area [mAU*s] | Height [mAU] | Area %  |
|----------|---------------|------|-------------|--------------|--------------|---------|
| 1        | 17.180        | BB   | 0.0952      | 8.94699      | 1.42591      | 1.3034  |
| 2        | 18.506        | BB   | 0.0853      | 677.49988    | 121.10182    | 98.6966 |
| Totals : |               |      |             | 686.44687    | 122.52773    |         |

\*\*\* End of Report \*\*\*

# Mass Spectrum of Compound 22

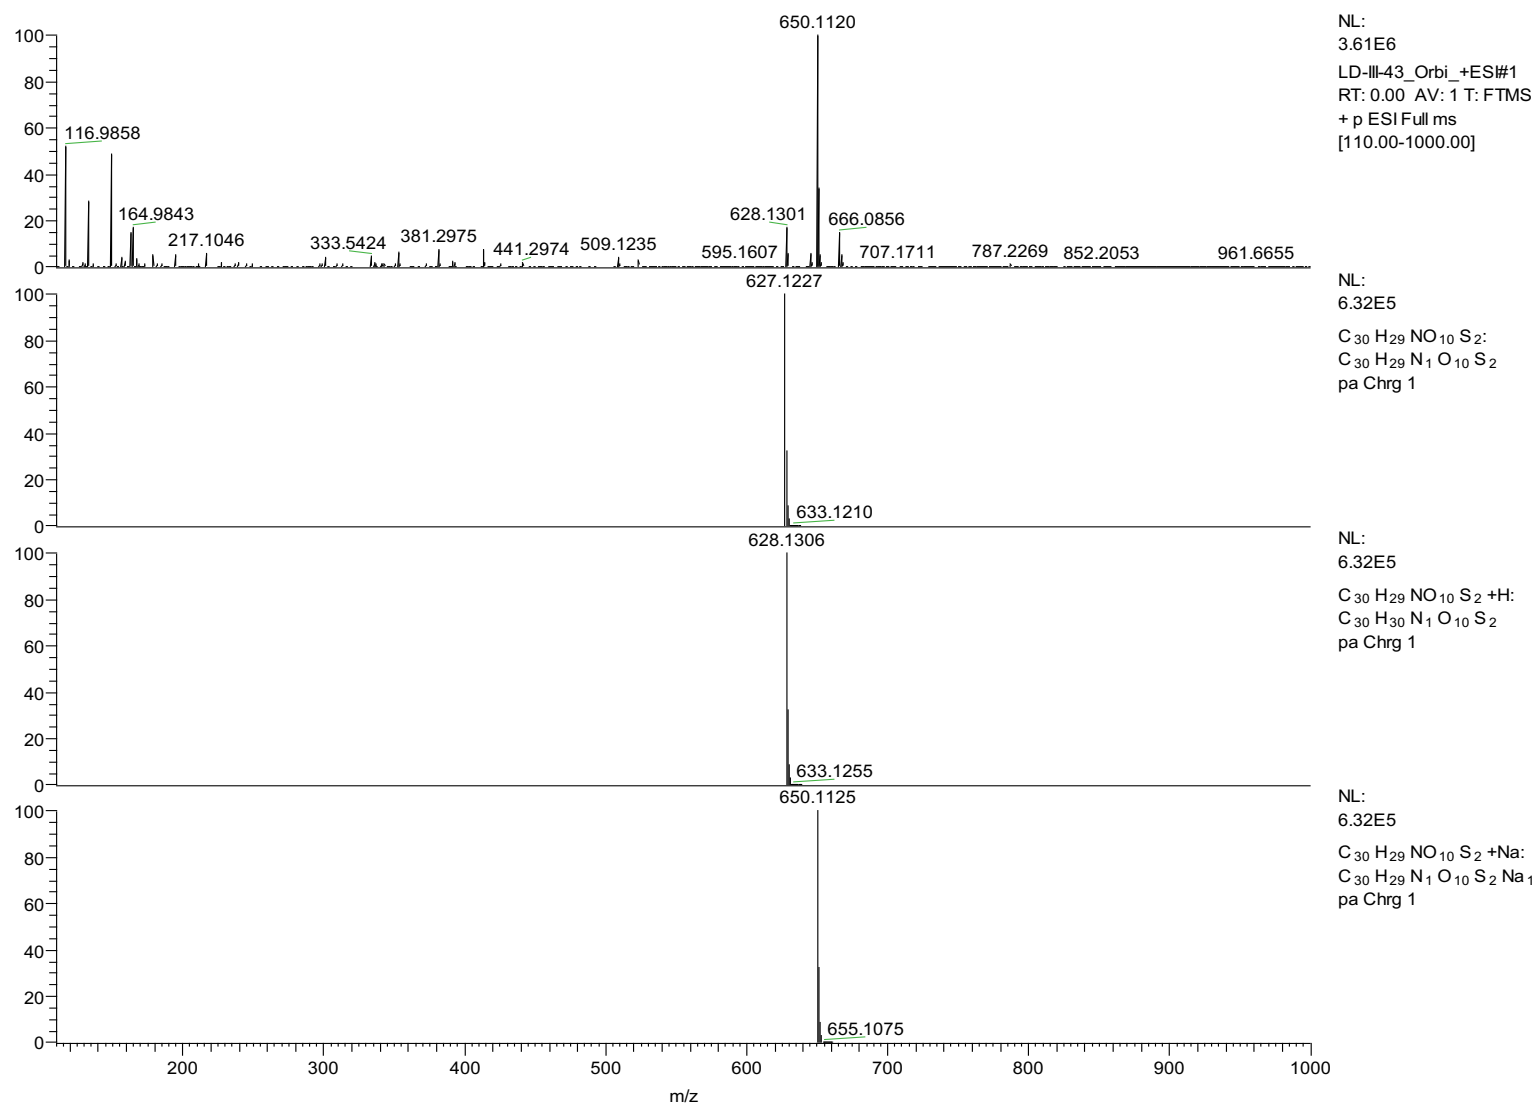

$^1\text{H}$  NMR (500 MHz,  $\text{CDCl}_3$ ) of (Z)-3-Methoxy-2-(2-(5-nitrothiophen-2-yl)propoxy)-6-(3,4,5-trimethoxystyryl)-phenyl-4-methylbenzenesulfonate (**23**)

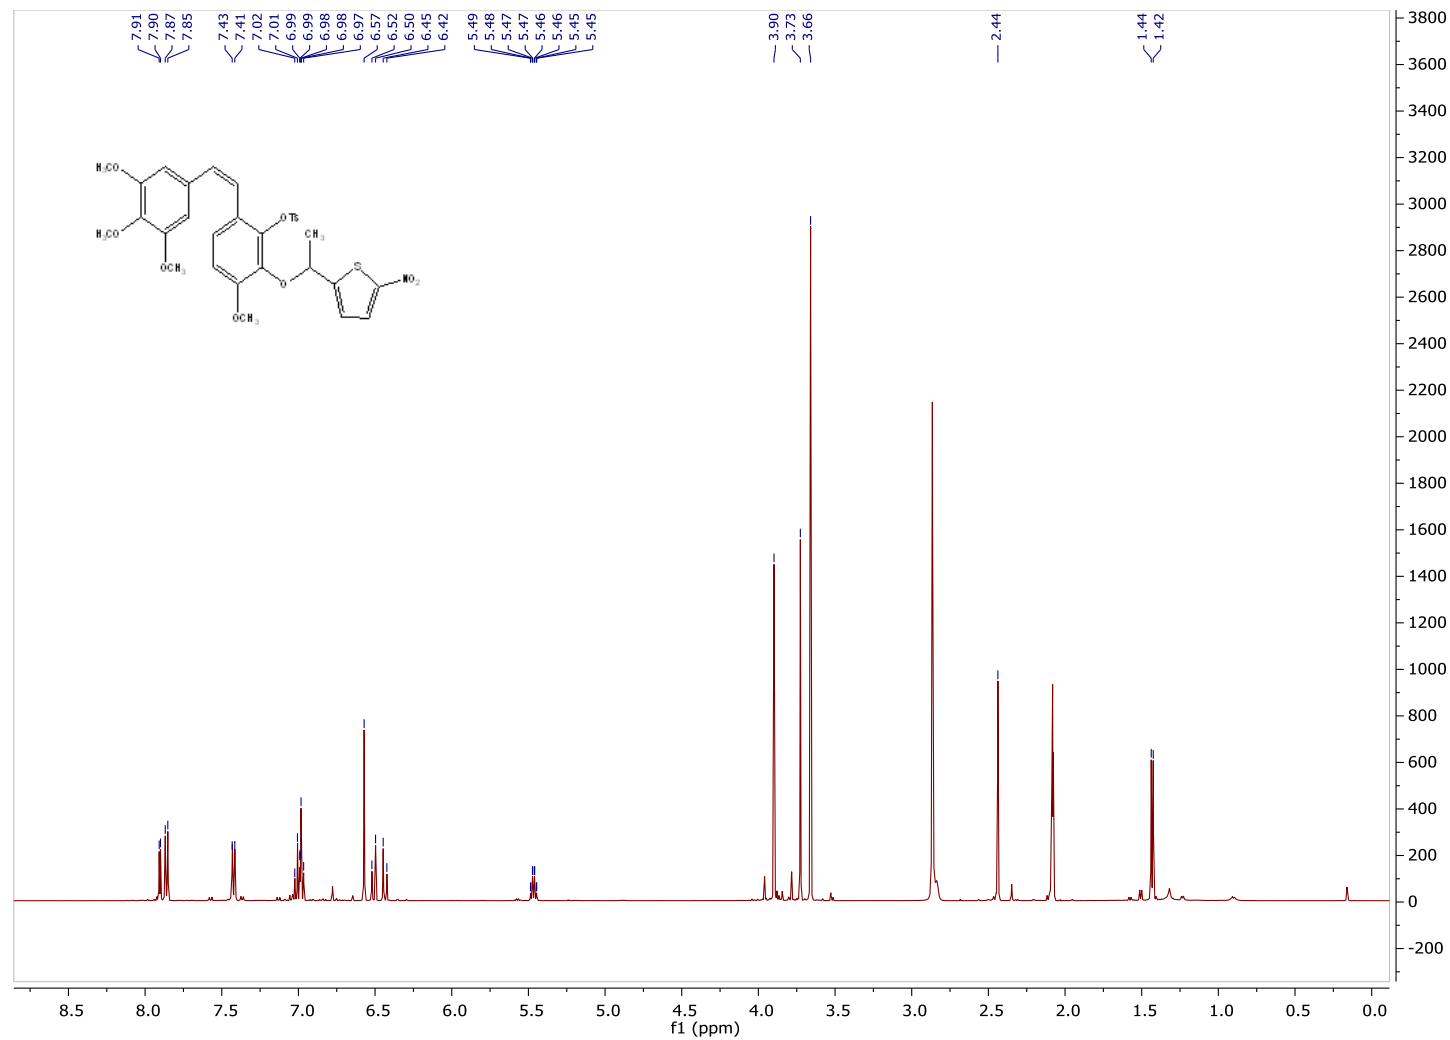

$^{13}\text{C}$  NMR (500 MHz,  $\text{CDCl}_3$ ) of (Z)-3-Methoxy-2-(2-(5-nitrothiophen-2-yl)propoxy)-6-(3,4,5-trimethoxystyryl)-phenyl-4-methylbenzenesulfonate (**23**)

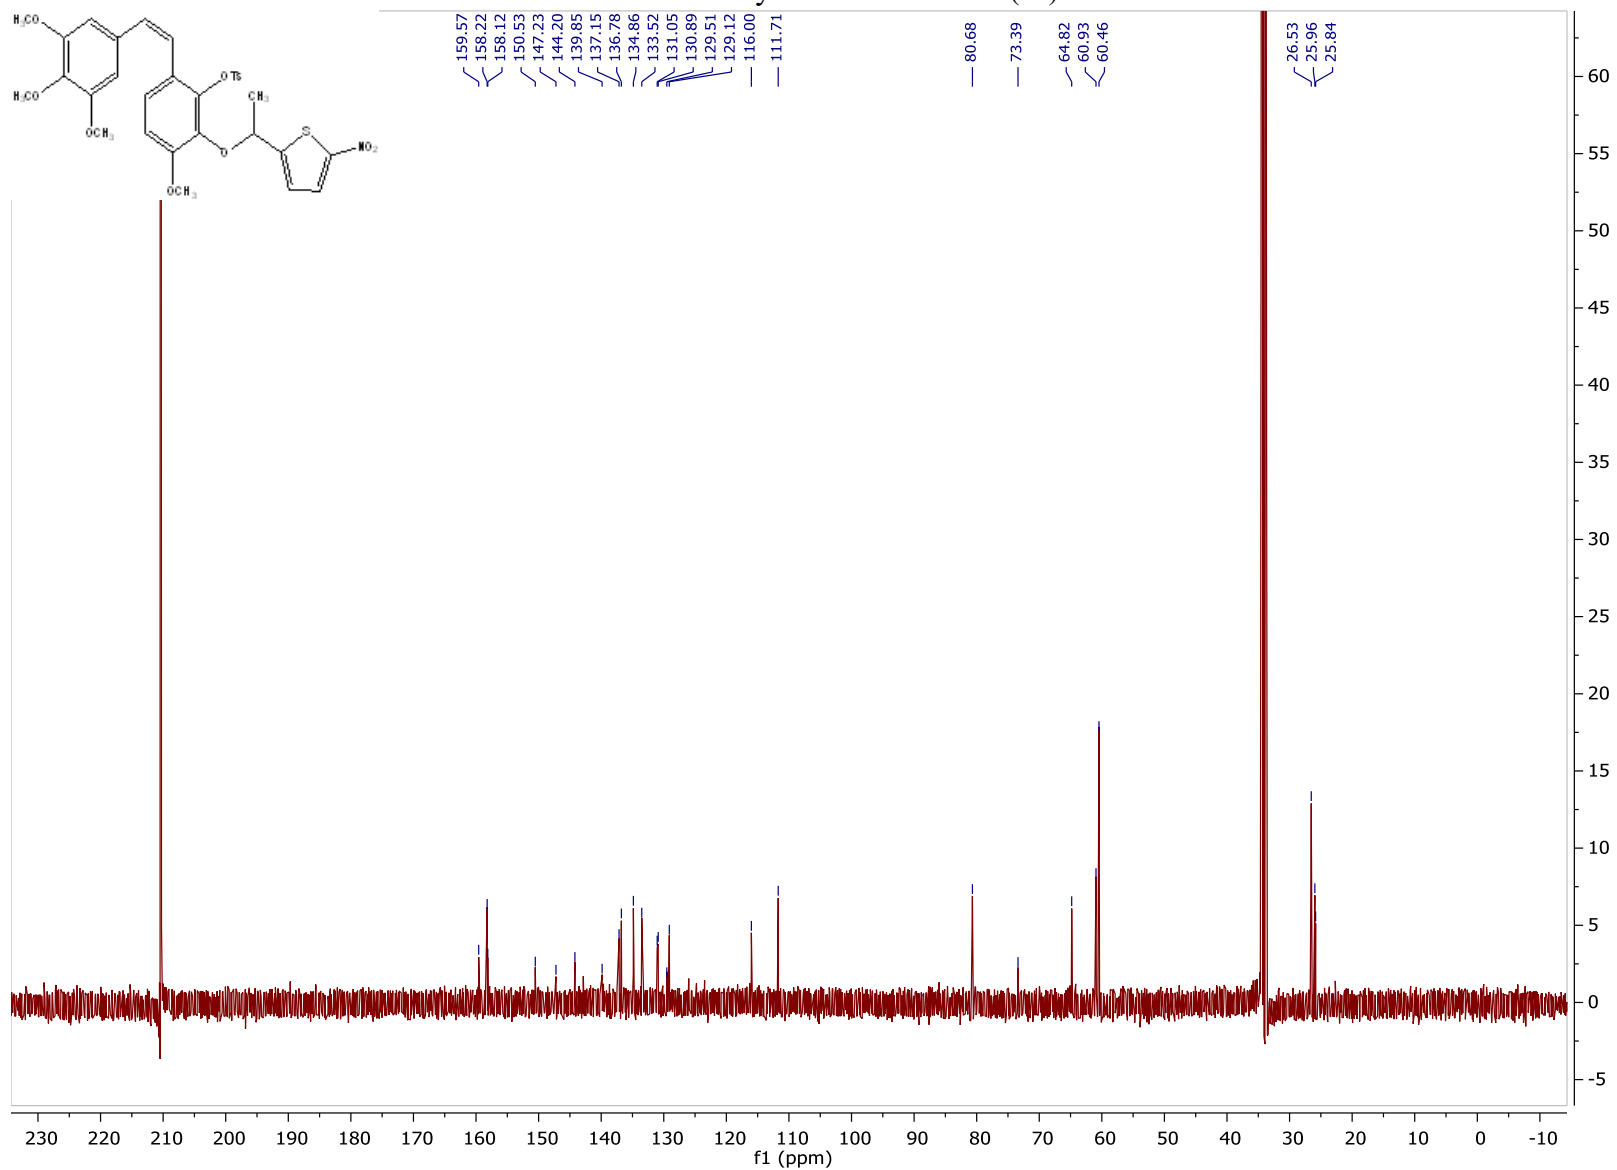

## HPLC trace of compound 23

Data File C:\Chem32\1\Data\Blake\RUN1000004.D

Sample Name: TosylMono CA1 Run 1

```
=====
Acq. Operator   : Blake
Acq. Instrument : Instrument 1           Location :   -
Injection Date  : 3/5/2015 8:21:32 PM
Acq. Method     : C:\CHEM32\1\METHODS\GRAD 2 50-90 ACN.M
Last changed    : 3/5/2015 7:55:58 PM by Blake
Analysis Method : C:\CHEM32\1\METHODS\RT-ACNWASH 2.M
Last changed    : 7/9/2015 2:27:22 PM by Blake
Method Info     : General Column Wash Method
```

Sample Info : Tosyl Mono Trigger CA1 Run 1

Additional Info : Peak(s) manually integrated

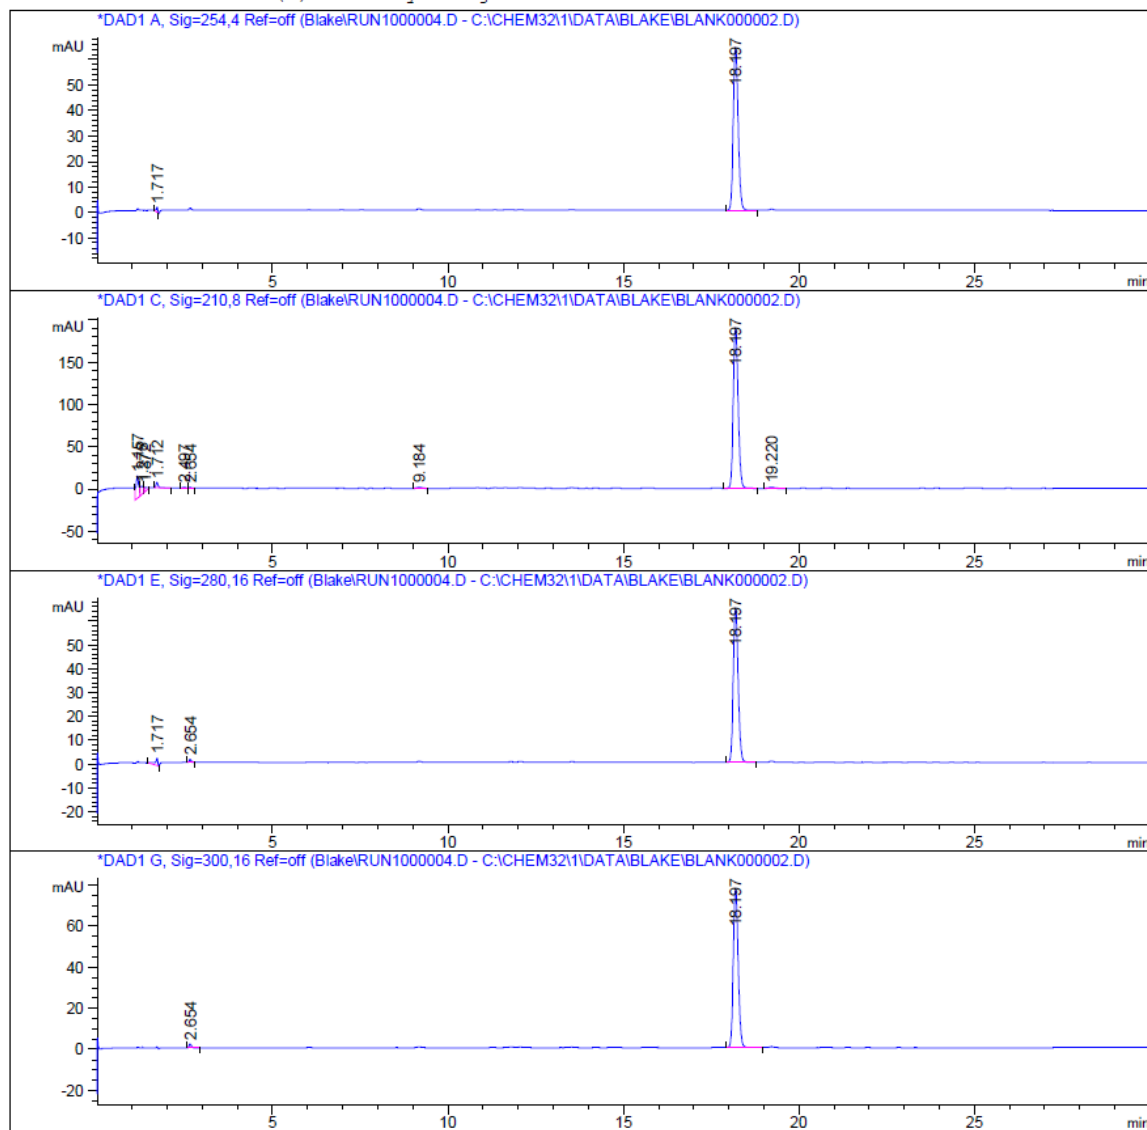

Data File C:\Chem32\1\Data\Blake\RUN1000004.D  
Sample Name: TosylMono CA1 Run 1

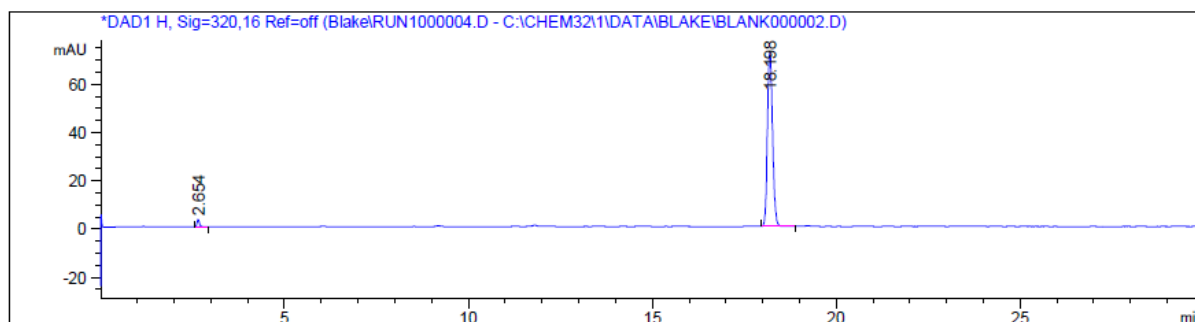

=====  
Area Percent Report  
=====

Sorted By : Signal  
Multiplier : 1.0000  
Dilution : 1.0000  
Use Multiplier & Dilution Factor with ISTDs

Signal 1: DAD1 A, Sig=254,4 Ref=off  
Signal has been modified after loading from rawdata file!

| Peak #   | RetTime [min] | Type | Width [min] | Area [mAU*s] | Height [mAU] | Area %  |
|----------|---------------|------|-------------|--------------|--------------|---------|
| 1        | 1.717         | BB   | 0.0497      | 6.60572      | 2.04210      | 1.0763  |
| 2        | 18.197        | BB   | 0.1470      | 607.16217    | 63.78918     | 98.9237 |
| Totals : |               |      |             | 613.76789    | 65.83128     |         |

Signal 2: DAD1 C, Sig=210,8 Ref=off  
Signal has been modified after loading from rawdata file!

| Peak #   | RetTime [min] | Type | Width [min] | Area [mAU*s] | Height [mAU] | Area %  |
|----------|---------------|------|-------------|--------------|--------------|---------|
| 1        | 1.157         | VV   | 0.0747      | 140.96169    | 26.23448     | 6.7080  |
| 2        | 1.278         | VV   | 0.0986      | 64.48904     | 9.56787      | 3.0689  |
| 3        | 1.372         | VB   | 0.0760      | 27.96374     | 5.09453      | 1.3307  |
| 4        | 1.712         | BB   | 0.0664      | 27.76718     | 6.42144      | 1.3214  |
| 5        | 2.497         | BV   | 0.0845      | 7.12432      | 1.28859      | 0.3390  |
| 6        | 2.654         | VB   | 0.0630      | 5.25895      | 1.30582      | 0.2503  |
| 7        | 9.184         | BB   | 0.1264      | 13.37233     | 1.61839      | 0.6364  |
| 8        | 18.197        | BB   | 0.1469      | 1798.89990   | 189.18680    | 85.6047 |
| 9        | 19.220        | BB   | 0.1466      | 15.56711     | 1.64256      | 0.7408  |
| Totals : |               |      |             | 2101.40426   | 242.36048    |         |

Data File C:\Chem32\1\Data\Blake\RUN1000004.D  
Sample Name: TosylMono CA1 Run 1

Signal 3: DAD1 E, Sig=280,16 Ref=off

Signal has been modified after loading from rawdata file!

| Peak #   | RetTime [min] | Type | Width [min] | Area [mAU*s] | Height [mAU] | Area %  |
|----------|---------------|------|-------------|--------------|--------------|---------|
| 1        | 1.717         | BB   | 0.0774      | 16.70851     | 2.98108      | 2.6269  |
| 2        | 2.654         | BB   | 0.0649      | 5.25675      | 1.25308      | 0.8265  |
| 3        | 18.197        | BB   | 0.1470      | 614.09607    | 64.56446     | 96.5467 |
| Totals : |               |      |             | 636.06133    | 68.79862     |         |

Signal 4: DAD1 G, Sig=300,16 Ref=off

Signal has been modified after loading from rawdata file!

| Peak #   | RetTime [min] | Type | Width [min] | Area [mAU*s] | Height [mAU] | Area %  |
|----------|---------------|------|-------------|--------------|--------------|---------|
| 1        | 2.654         | BB   | 0.0678      | 8.59714      | 1.93753      | 1.1541  |
| 2        | 18.197        | BB   | 0.1472      | 736.32220    | 77.24043     | 98.8459 |
| Totals : |               |      |             | 744.91934    | 79.17796     |         |

Signal 5: DAD1 H, Sig=320,16 Ref=off

Signal has been modified after loading from rawdata file!

| Peak #   | RetTime [min] | Type | Width [min] | Area [mAU*s] | Height [mAU] | Area %  |
|----------|---------------|------|-------------|--------------|--------------|---------|
| 1        | 2.654         | BB   | 0.0673      | 12.99429     | 2.95627      | 1.8475  |
| 2        | 18.198        | BB   | 0.1476      | 690.34473    | 72.19302     | 98.1525 |
| Totals : |               |      |             | 703.33902    | 75.14929     |         |

\*\*\* End of Report \*\*\*

# Mass Spectrum of Compound 23

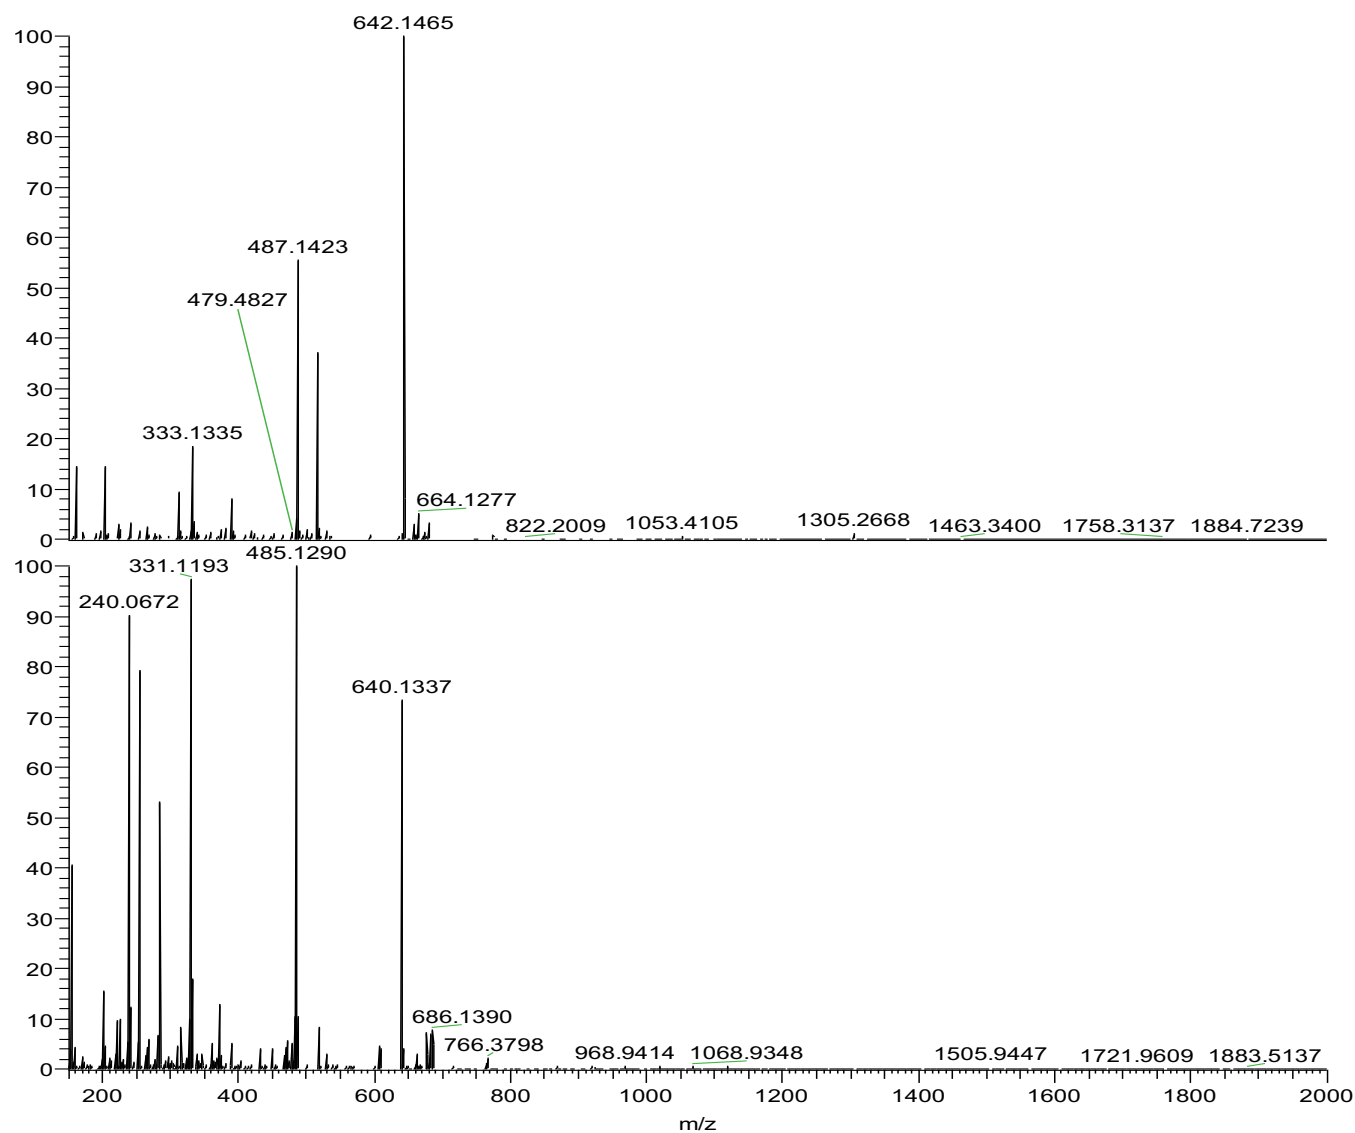

NL: 3.84E6  
Ts Mono CA1#2 RT:  
0.02 AV: 1 T: FTMS +  
p APCI corona pi Full  
ms [150.00-2000.00]

NL: 4.67E5  
ts mono ca1 neg#2  
RT: 0.02 AV: 1 T:  
FTMS - p APCI  
corona pi Full ms  
[150.00-2000.00]

<sup>1</sup>H NMR (500 MHz, CDCl<sub>3</sub>) for Compound **24**

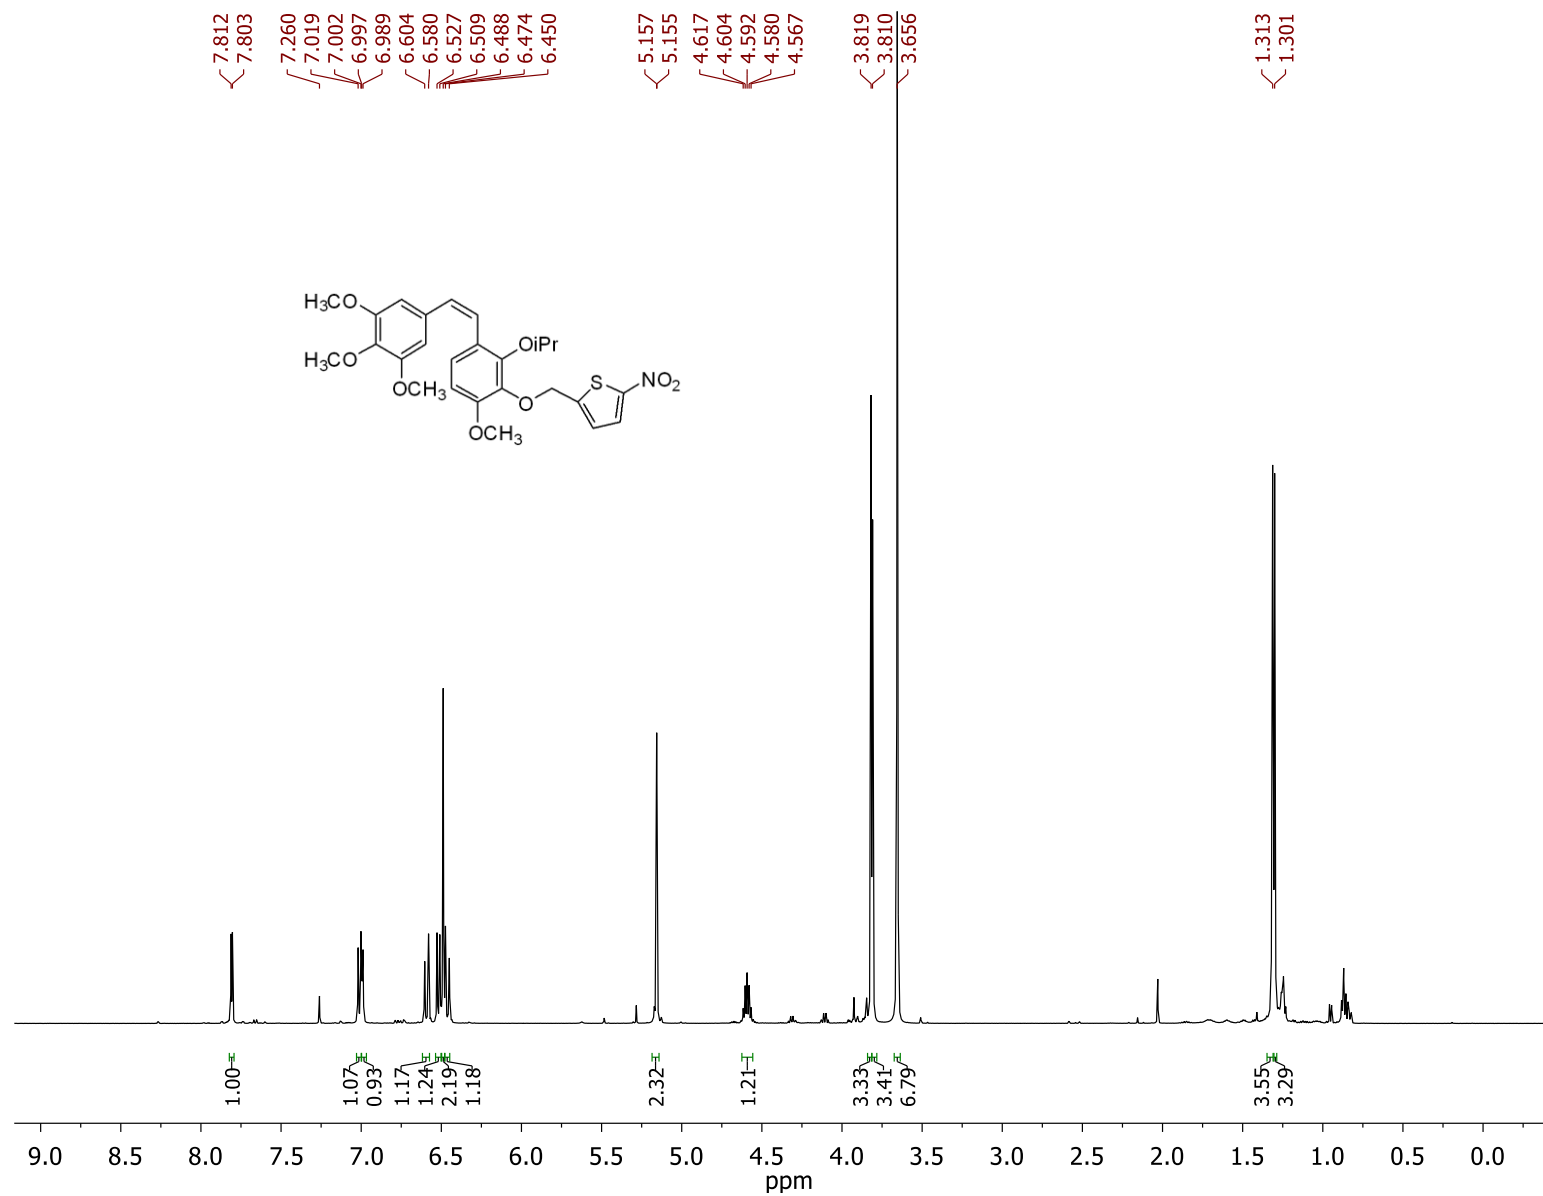

<sup>13</sup>C NMR (125 MHz, CDCl<sub>3</sub>) for Compound **24**

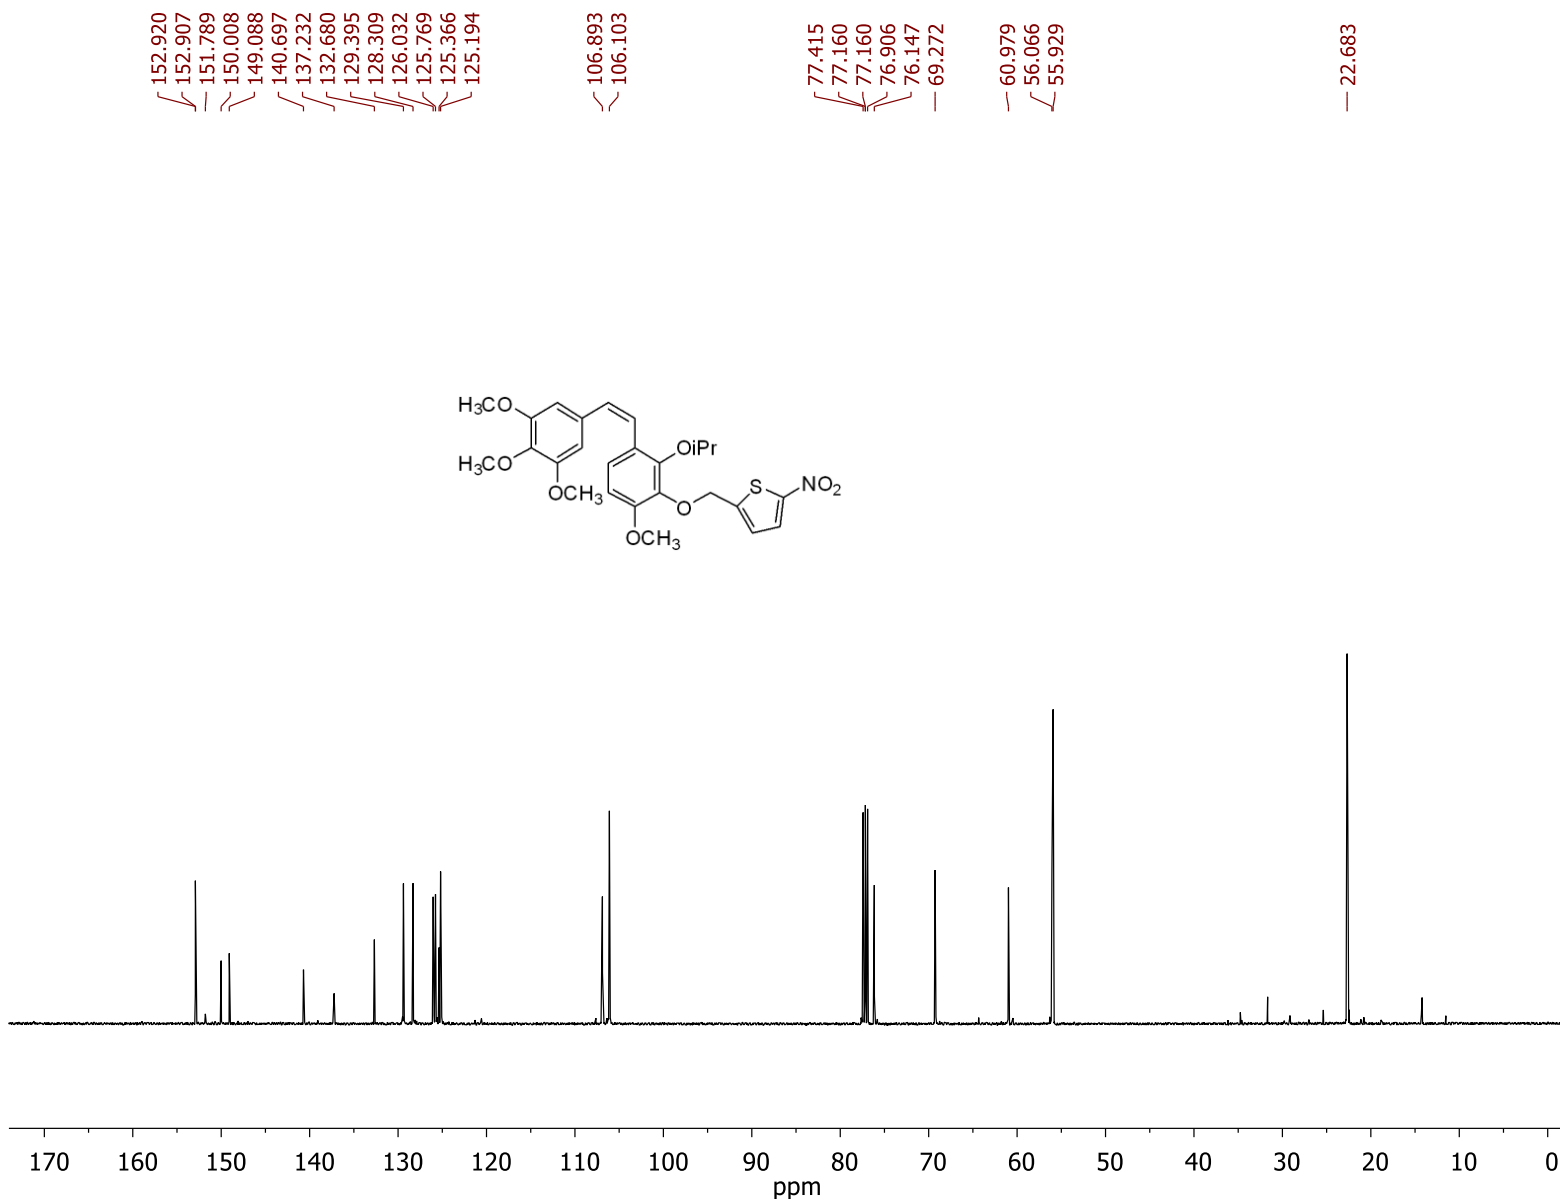

## HPLC Traces of Compound 24

Data File C:\CHEM32\1\DATA\LAXMAN\LD-V-97-1ARUN02.D

Sample Name: LD-V-97-1A-run2

```
=====
Acq. Operator   : Casey
Acq. Instrument : Instrument 1          Location : -
Injection Date  : 6/11/2014 12:23:01 PM
Acq. Method     : C:\CHEM32\1\METHODS\MASTERMETHOD.M
Last changed    : 6/11/2014 12:20:19 PM by Casey
Analysis Method : C:\CHEM32\1\DATA\LAXMAN\LD-V-97-1ARUN02.D\DA.M (MASTERMETHOD.M)
Last changed    : 3/6/2015 11:26:20 AM by Blake
                  (modified after loading)
Sample Info     : LD-V-97-1A-run2
                  Mastermethod
```

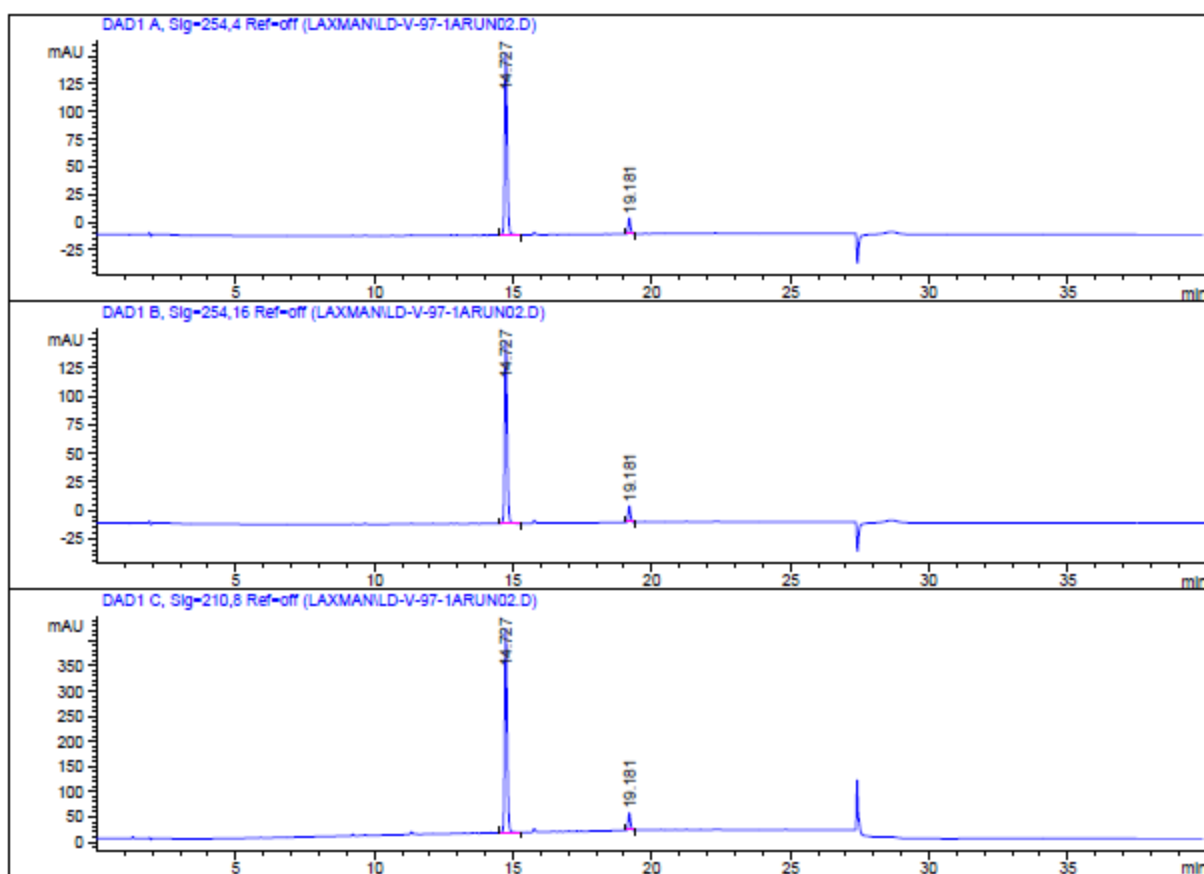

Data File C:\CHEM32\1\DATA\LAXMAN\LD-V-97-1ARUN02.D  
Sample Name: LD-V-97-1A-run2

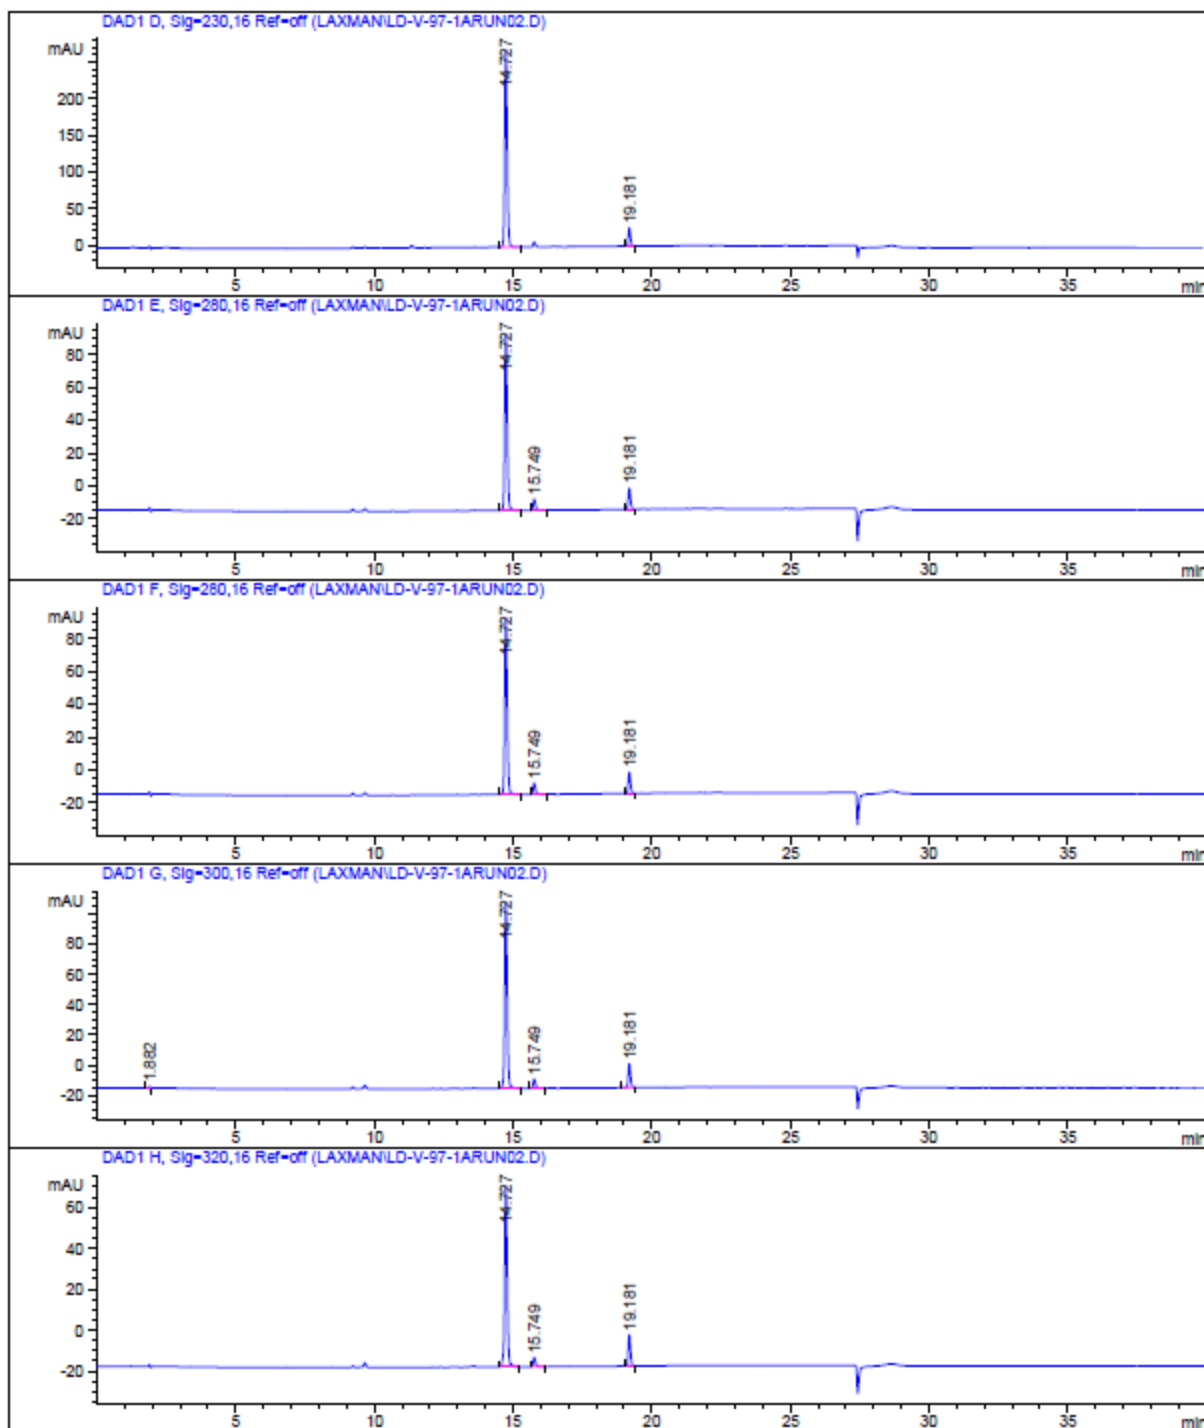

Data File C:\CHEM32\1\DATA\LAXMAN\LD-V-97-1A\RUN02.D  
Sample Name: LD-V-97-1A-run2

=====  
Area Percent Report  
=====

Sorted By : Signal  
Multiplier : 1.0000  
Dilution : 1.0000  
Use Multiplier & Dilution Factor with ISTDs

Signal 1: DAD1 A, Sig=254,4 Ref=off

| Peak # | RetTime [min] | Type | Width [min] | Area [mAU*s] | Height [mAU] | Area %  |
|--------|---------------|------|-------------|--------------|--------------|---------|
| 1      | 14.727        | BB   | 0.0937      | 1013.76843   | 165.00717    | 92.8924 |
| 2      | 19.181        | BB   | 0.0863      | 77.56749     | 14.08282     | 7.1076  |

Totals : 1091.33592 179.08999

Signal 2: DAD1 B, Sig=254,16 Ref=off

| Peak # | RetTime [min] | Type | Width [min] | Area [mAU*s] | Height [mAU] | Area %  |
|--------|---------------|------|-------------|--------------|--------------|---------|
| 1      | 14.727        | BB   | 0.0937      | 987.21277    | 160.64627    | 92.7104 |
| 2      | 19.181        | BB   | 0.0863      | 77.62172     | 14.09153     | 7.2896  |

Totals : 1064.83449 174.73780

Signal 3: DAD1 C, Sig=210,8 Ref=off

| Peak # | RetTime [min] | Type | Width [min] | Area [mAU*s] | Height [mAU] | Area %  |
|--------|---------------|------|-------------|--------------|--------------|---------|
| 1      | 14.727        | BB   | 0.0932      | 2476.75439   | 405.73618    | 92.9730 |
| 2      | 19.181        | VB   | 0.0864      | 187.19514    | 33.90105     | 7.0270  |

Totals : 2663.94954 439.63723

Signal 4: DAD1 D, Sig=230,16 Ref=off

| Peak # | RetTime [min] | Type | Width [min] | Area [mAU*s] | Height [mAU] | Area %  |
|--------|---------------|------|-------------|--------------|--------------|---------|
| 1      | 14.727        | BB   | 0.0935      | 1653.68958   | 269.86240    | 92.4120 |
| 2      | 19.181        | VB   | 0.0865      | 135.78531    | 24.57749     | 7.5880  |

Instrument 1 2/6/2015 11:26:26 AM R1-1a

Page 3 of 5

Created with novaPDF Printer ([www.novapdf.com](http://www.novapdf.com)) Please register to remove this message

Data File C:\CHEM32\1\DATA\LAKMAN\LD-V-97-1A\RUN02.D  
Sample Name: LD-V-97-1A-run2

| Peak #                              | RetTime [min] | Type | Width [min] | Area [mAU*s] | Height [mAU] | Area % |
|-------------------------------------|---------------|------|-------------|--------------|--------------|--------|
| ----- ----- ----- ----- ----- ----- |               |      |             |              |              |        |
| Totals :                            |               |      |             | 1789.47488   | 294.43989    |        |

Signal 5: DAD1 E, Sig=280,16 Ref=off

| Peak #                              | RetTime [min] | Type | Width [min] | Area [mAU*s] | Height [mAU] | Area %  |
|-------------------------------------|---------------|------|-------------|--------------|--------------|---------|
| ----- ----- ----- ----- ----- ----- |               |      |             |              |              |         |
| 1                                   | 14.727        | BB   | 0.0939      | 663.65198    | 107.74279    | 85.4036 |
| 2                                   | 15.749        | BB   | 0.0929      | 42.01422     | 6.91261      | 5.4067  |
| 3                                   | 19.181        | BB   | 0.0862      | 71.41132     | 12.97093     | 9.1897  |
| ----- ----- ----- ----- ----- ----- |               |      |             |              |              |         |
| Totals :                            |               |      |             | 777.07752    | 127.62633    |         |

Signal 6: DAD1 F, Sig=280,16 Ref=off

| Peak #                              | RetTime [min] | Type | Width [min] | Area [mAU*s] | Height [mAU] | Area %  |
|-------------------------------------|---------------|------|-------------|--------------|--------------|---------|
| ----- ----- ----- ----- ----- ----- |               |      |             |              |              |         |
| 1                                   | 14.727        | BB   | 0.0939      | 663.65198    | 107.74279    | 85.4036 |
| 2                                   | 15.749        | BB   | 0.0929      | 42.01422     | 6.91261      | 5.4067  |
| 3                                   | 19.181        | BB   | 0.0862      | 71.41132     | 12.97093     | 9.1897  |
| ----- ----- ----- ----- ----- ----- |               |      |             |              |              |         |
| Totals :                            |               |      |             | 777.07752    | 127.62633    |         |

Signal 7: DAD1 G, Sig=300,16 Ref=off

| Peak #                              | RetTime [min] | Type | Width [min] | Area [mAU*s] | Height [mAU] | Area %  |
|-------------------------------------|---------------|------|-------------|--------------|--------------|---------|
| ----- ----- ----- ----- ----- ----- |               |      |             |              |              |         |
| 1                                   | 1.882         | BB   | 0.0563      | 5.62916      | 1.48090      | 0.6242  |
| 2                                   | 14.727        | BB   | 0.0948      | 770.54956    | 123.48886    | 85.4397 |
| 3                                   | 15.749        | BB   | 0.0922      | 36.64074     | 6.09094      | 4.0628  |
| 4                                   | 19.181        | BB   | 0.0877      | 89.04414     | 15.81382     | 9.8733  |
| ----- ----- ----- ----- ----- ----- |               |      |             |              |              |         |
| Totals :                            |               |      |             | 901.86360    | 146.87453    |         |

Signal 8: DAD1 H, Sig=320,16 Ref=off

Data File C:\CHEM32\1\DATA\LAXMAN\LD-V-97-1A\RUN02.D  
Sample Name: LD-V-97-1A-run2

| Peak # | RetTime [min] | Type | Width [min] | Area [mAU*s] | Height [mAU] | Area %  |
|--------|---------------|------|-------------|--------------|--------------|---------|
| 1      | 14.727        | BB   | 0.0968      | 568.63849    | 88.65764     | 83.4444 |
| 2      | 15.749        | BB   | 0.0922      | 27.48027     | 4.56638      | 4.0326  |
| 3      | 19.181        | VB   | 0.0867      | 85.33914     | 15.39945     | 12.5230 |

Totals : 681.45790 108.62348

=====  
\*\*\* End of Report \*\*\*

# Mass Spectrum of Compound 24

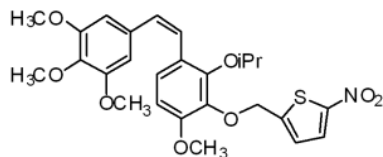

Chemical Formula:  $C_{26}H_{29}NO_8S$

Exact Mass: 515.1614

Molecular Weight: 515.5770

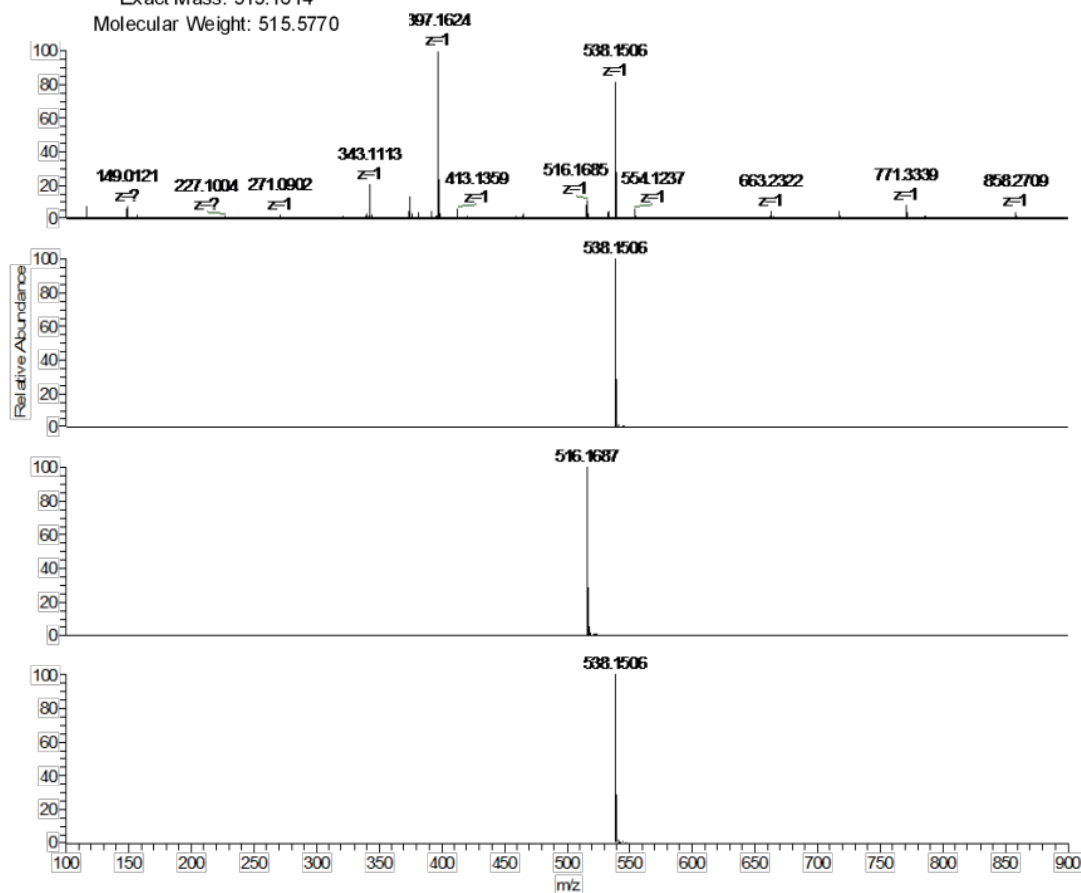

<sup>1</sup>H NMR (600 MHz, CDCl<sub>3</sub>) for Compound **25**

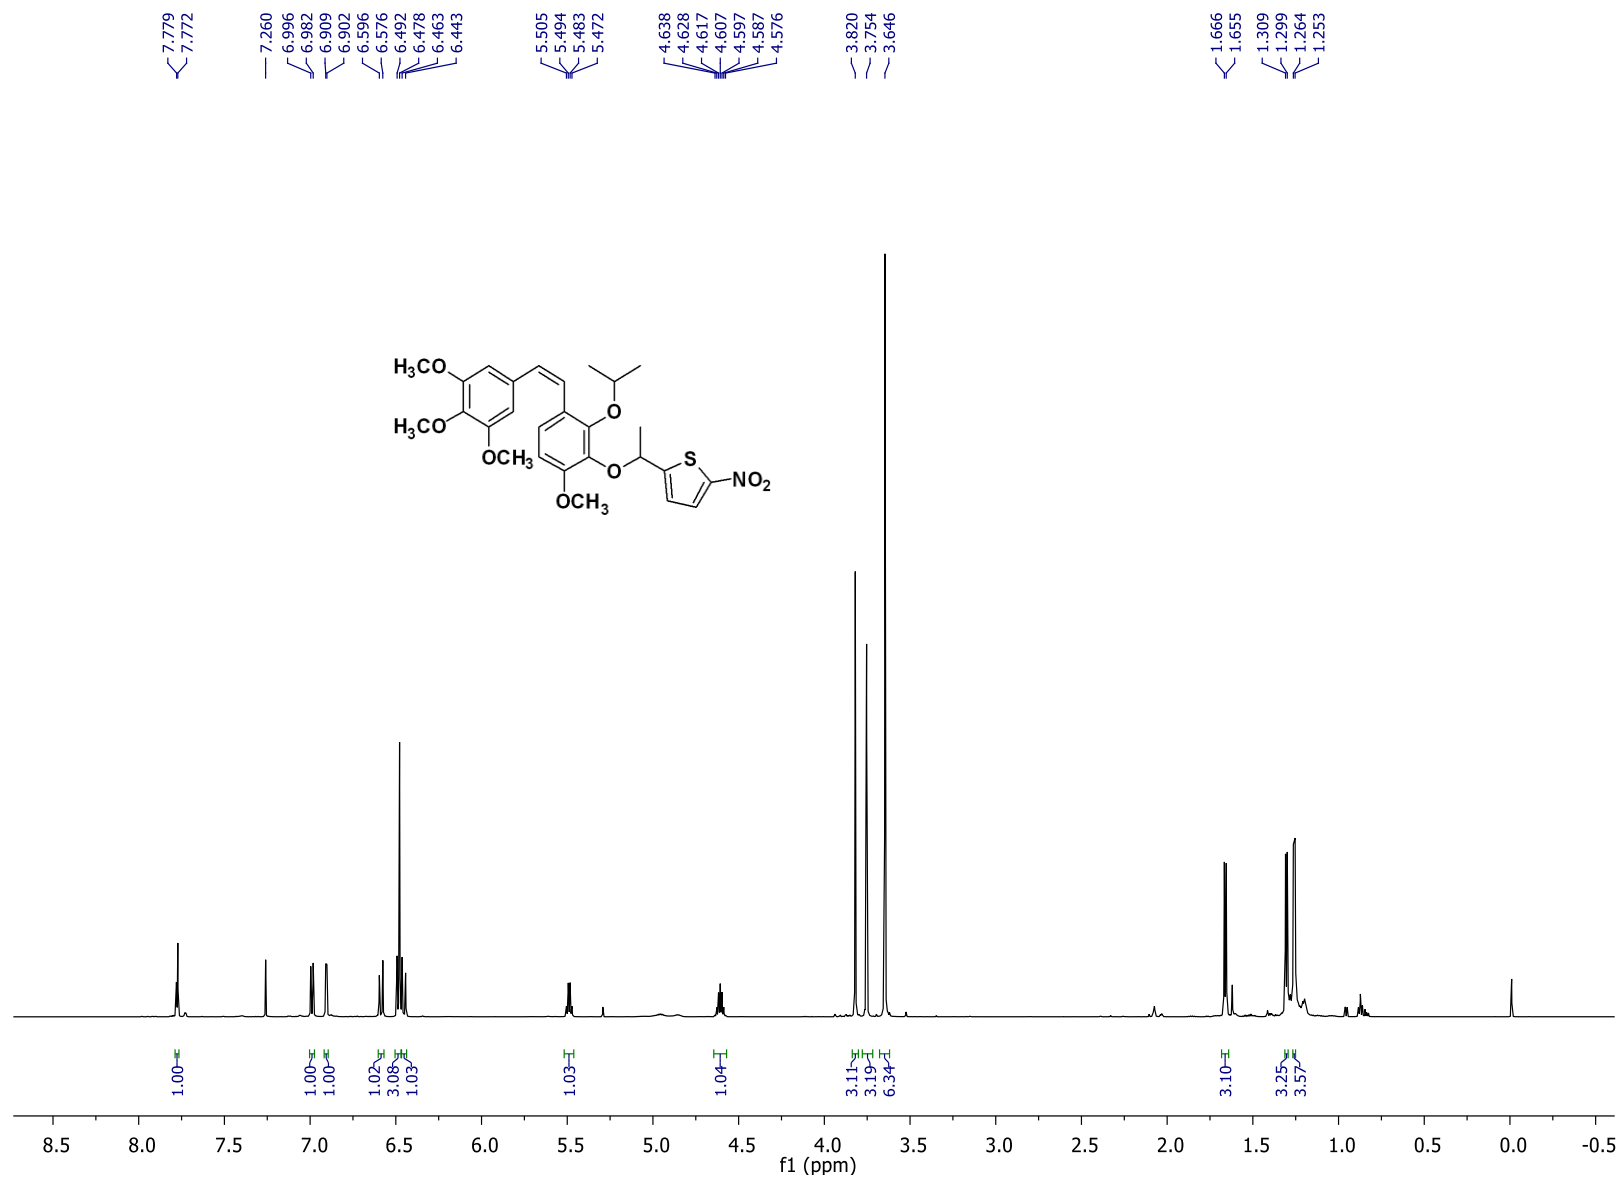

Chemical structure of compound 10 is shown above the spectrum. The structure is a complex molecule featuring a central benzene ring substituted with a methoxy group (H<sub>3</sub>CO), a methoxy group (OCH<sub>3</sub>), and a vinyl group (CH=CH<sub>2</sub>). The vinyl group is connected to another benzene ring, which is further substituted with a methoxy group (OCH<sub>3</sub>) and a methoxy group (OCH<sub>3</sub>). This second benzene ring is connected to a third benzene ring, which is substituted with a methoxy group (OCH<sub>3</sub>) and a methoxy group (OCH<sub>3</sub>). The third benzene ring is connected to a thiophene ring, which is substituted with a nitro group (NO<sub>2</sub>).

The <sup>13</sup>C NMR spectrum (f1 (ppm)) shows the following peaks (ppm):

| Peak (ppm) |
|------------|
| 155.230    |
| 153.115    |
| 152.798    |
| 150.977    |
| 150.154    |
| 139.202    |
| 136.990    |
| 132.649    |
| 129.200    |
| 128.127    |
| 125.929    |
| 125.874    |
| 125.262    |
| 123.540    |
| 106.639    |
| 105.904    |
| 75.693     |
| 75.372     |
| 60.932     |
| 55.867     |
| 55.801     |
| 22.600     |
| 22.493     |
| 22.242     |

## HPLC Traces for Compound 25

Data File C:\CHEM32\1\DATA\LAXMAN\LD-VII-29-1A001.D

Sample Name: LD-VII-29-1A

```
=====
Acq. Operator   : Laxman
Acq. Instrument : Instrument 1           Location : -
Injection Date  : 3/1/2015 3:44:20 PM
Acq. Method     : C:\CHEM32\1\METHODS\GRAD 2 50-90 ACN.M
Last changed    : 3/1/2015 3:36:56 PM by Laxman
Analysis Method : C:\CHEM32\1\DATA\LAXMAN\LD-VII-29-1A001.D\DA.M (GRAD 2 50-90 ACN.M)
Last changed    : 3/1/2015 4:24:33 PM by Laxman
=====
```

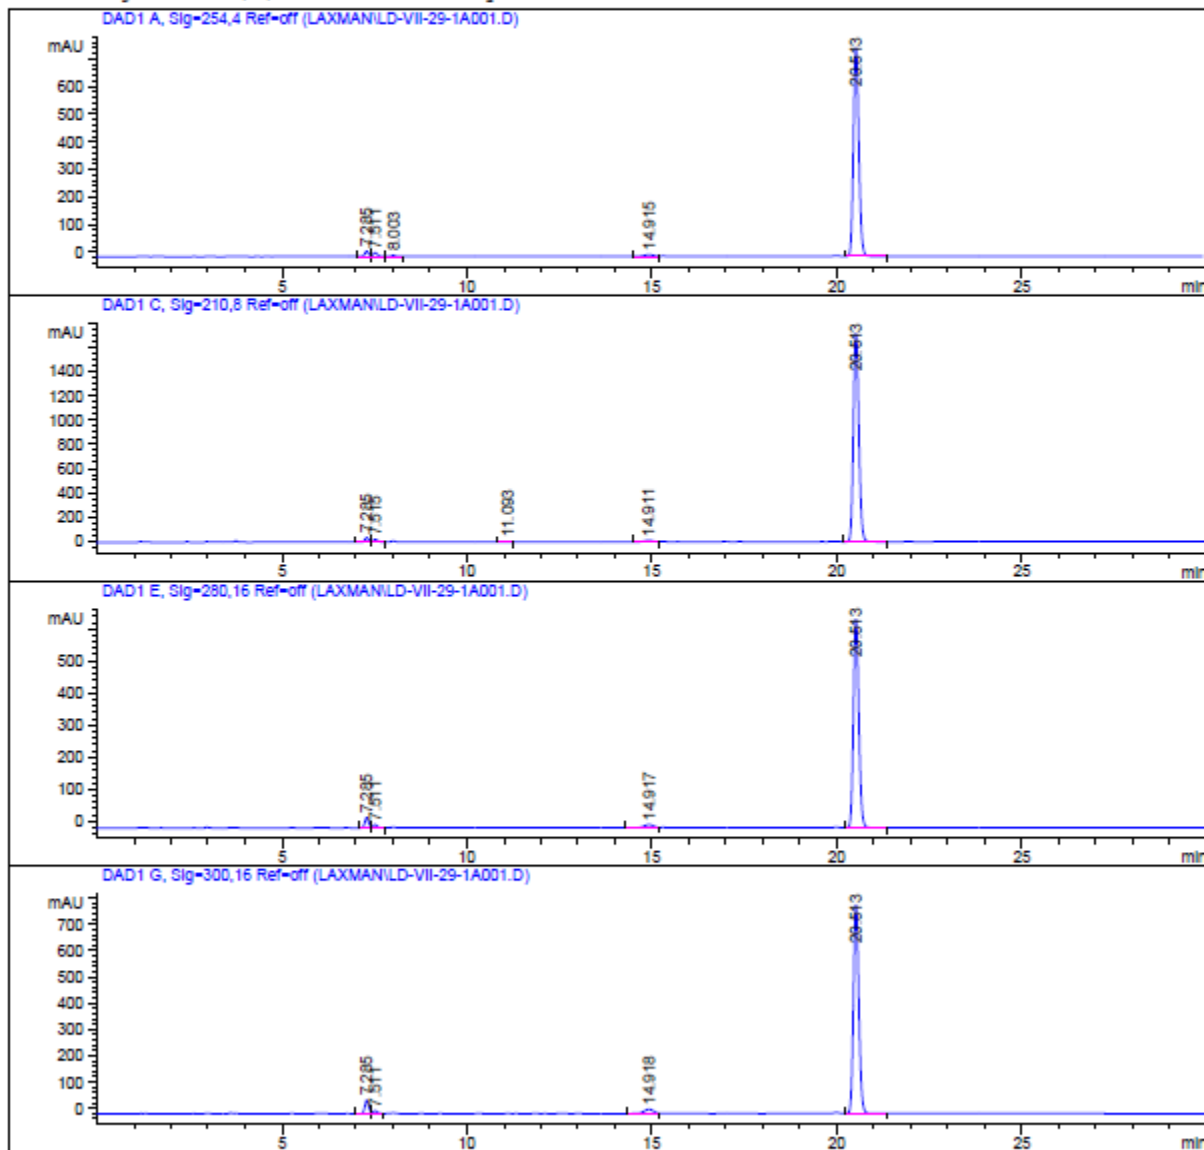

Data File C:\CHEM32\1\DATA\LAXMAN\LD-VII-29-1A001.D  
Sample Name: LD-VII-29-1A

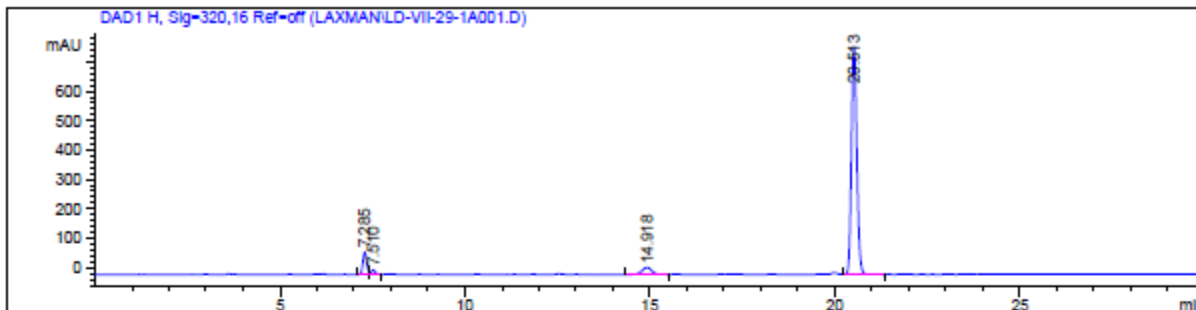

=====  
Area Percent Report  
=====

Sorted By : Signal  
Multiplier : 1.0000  
Dilution : 1.0000  
Use Multiplier & Dilution Factor with ISTDs

Signal 1: DAD1 A, Sig=254,4 Ref=off

| Peak # | RetTime [min] | Type | Width [min] | Area [mAU*s] | Height [mAU] | Area %  |
|--------|---------------|------|-------------|--------------|--------------|---------|
| 1      | 7.285         | BV   | 0.1134      | 137.70985    | 16.81188     | 1.7190  |
| 2      | 7.511         | VB   | 0.1180      | 108.58200    | 14.07325     | 1.3554  |
| 3      | 8.003         | BB   | 0.1245      | 30.20725     | 3.72818      | 0.3771  |
| 4      | 14.915        | BV   | 0.2773      | 103.74889    | 8.89437      | 1.2951  |
| 5      | 20.513        | VB   | 0.1877      | 7630.70166   | 756.65521    | 95.2534 |

Totals : 8010.94966 799.16290

Signal 2: DAD1 C, Sig=210,8 Ref=off

| Peak # | RetTime [min] | Type | Width [min] | Area [mAU*s] | Height [mAU] | Area %  |
|--------|---------------|------|-------------|--------------|--------------|---------|
| 1      | 7.285         | BV   | 0.1181      | 282.01685    | 36.51880     | 1.5456  |
| 2      | 7.515         | VB   | 0.1310      | 187.78674    | 21.27100     | 1.0291  |
| 3      | 11.093        | BV   | 0.1711      | 14.92364     | 1.34912      | 0.0818  |
| 4      | 14.911        | BV   | 0.2798      | 225.43584    | 12.77740     | 1.2355  |
| 5      | 20.513        | VB   | 0.1588      | 1.75367e4    | 1721.62097   | 96.1080 |

Totals : 1.82469e4 1793.53730

Data File C:\CHEM32\1\DATA\LAXMAN\LD-VII-29-1A001.D  
Sample Name: LD-VII-29-1A

Signal 3: DAD1 E, Sig=280,16 Ref=off

| Peak # | RetTime [min] | Type | Width [min] | Area [mAU*s] | Height [mAU] | Area %  |
|--------|---------------|------|-------------|--------------|--------------|---------|
| 1      | 7.285         | BV   | 0.1138      | 238.84053    | 32.47009     | 3.3890  |
| 2      | 7.511         | VB   | 0.1171      | 77.61353     | 9.94490      | 1.1013  |
| 3      | 14.917        | BV   | 0.2830      | 175.57196    | 9.80124      | 2.4912  |
| 4      | 20.513        | VB   | 0.1575      | 6555.55762   | 650.98096    | 93.0185 |

Totals : 7047.58364 703.19719

Signal 4: DAD1 G, Sig=300,16 Ref=off

| Peak # | RetTime [min] | Type | Width [min] | Area [mAU*s] | Height [mAU] | Area %  |
|--------|---------------|------|-------------|--------------|--------------|---------|
| 1      | 7.285         | BV   | 0.1139      | 376.73462    | 51.17566     | 4.2972  |
| 2      | 7.511         | VB   | 0.1162      | 81.67451     | 10.56421     | 0.9316  |
| 3      | 14.918        | BV   | 0.2823      | 290.15118    | 16.09673     | 3.3096  |
| 4      | 20.513        | VB   | 0.1556      | 8018.51367   | 795.31226    | 91.4617 |

Totals : 8767.07399 873.14884

Signal 5: DAD1 H, Sig=320,16 Ref=off

| Peak # | RetTime [min] | Type | Width [min] | Area [mAU*s] | Height [mAU] | Area %  |
|--------|---------------|------|-------------|--------------|--------------|---------|
| 1      | 7.285         | BV   | 0.1139      | 556.89746    | 75.66253     | 6.2256  |
| 2      | 7.510         | VB   | 0.1160      | 116.93579    | 15.15809     | 1.3072  |
| 3      | 14.918        | BB   | 0.2899      | 437.53549    | 23.64482     | 4.8912  |
| 4      | 20.513        | VB   | 0.1578      | 7833.95703   | 775.83319    | 87.5760 |

Totals : 8945.32578 890.29863

\*\*\* End of Report \*\*\*

# Mass Spectrum of Compound 25

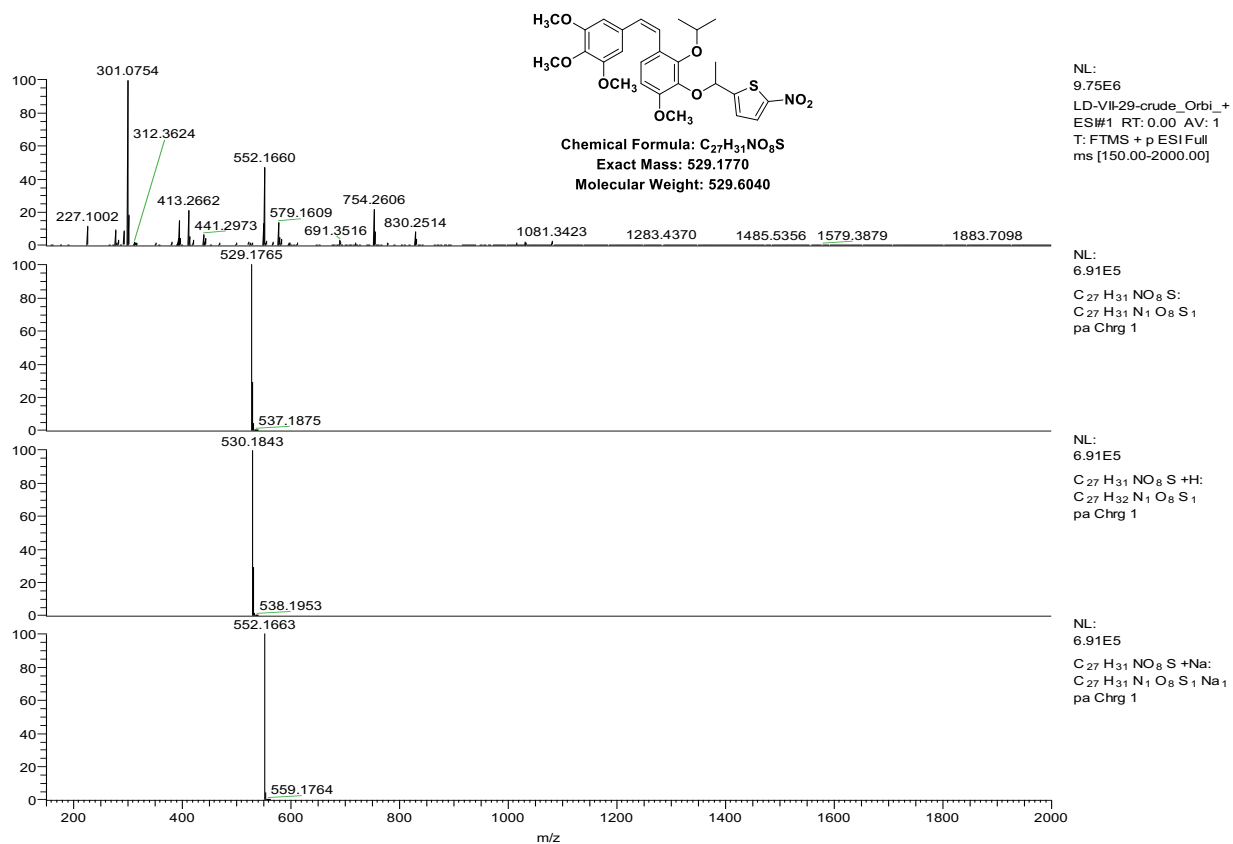

<sup>1</sup>H NMR (600 MHz, CDCl<sub>3</sub>) for Compound **26**

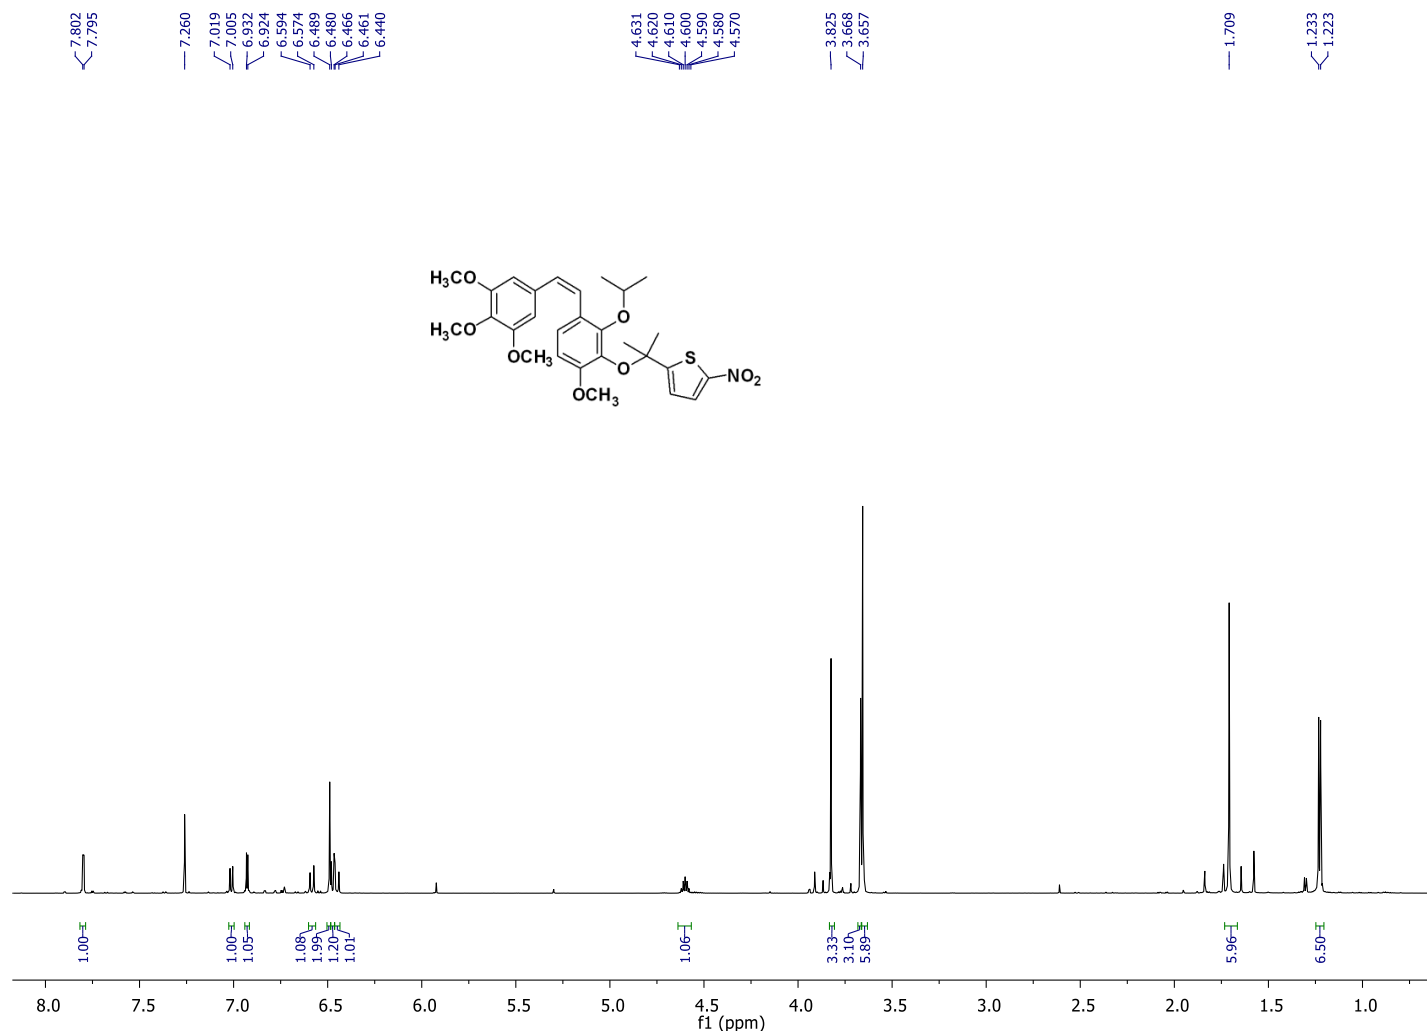

## HPLC Traces of Compound 26

Data File C:\CHEM32\1\DATA\LAXMAN\LD-VII-39-RUN03.D

Sample Name: LD-VII-39-run3

```
=====
Acq. Operator   : Laxman
Acq. Instrument : Instrument 1          Location :   -
Injection Date  : 3/15/2015 10:57:34 AM
Acq. Method     : C:\CHEM32\1\METHODS\GRAD 2 50-90 ACN.M
Last changed    : 3/15/2015 10:37:39 AM by Laxman
Analysis Method : C:\CHEM32\1\DATA\LAXMAN\LD-VII-39-RUN03.D\DA.M (GRAD 2 50-90 ACN.M)
Last changed    : 3/16/2015 6:22:00 PM by Laxman
Sample Info     : Method-Grad2 50-90% ACN
```

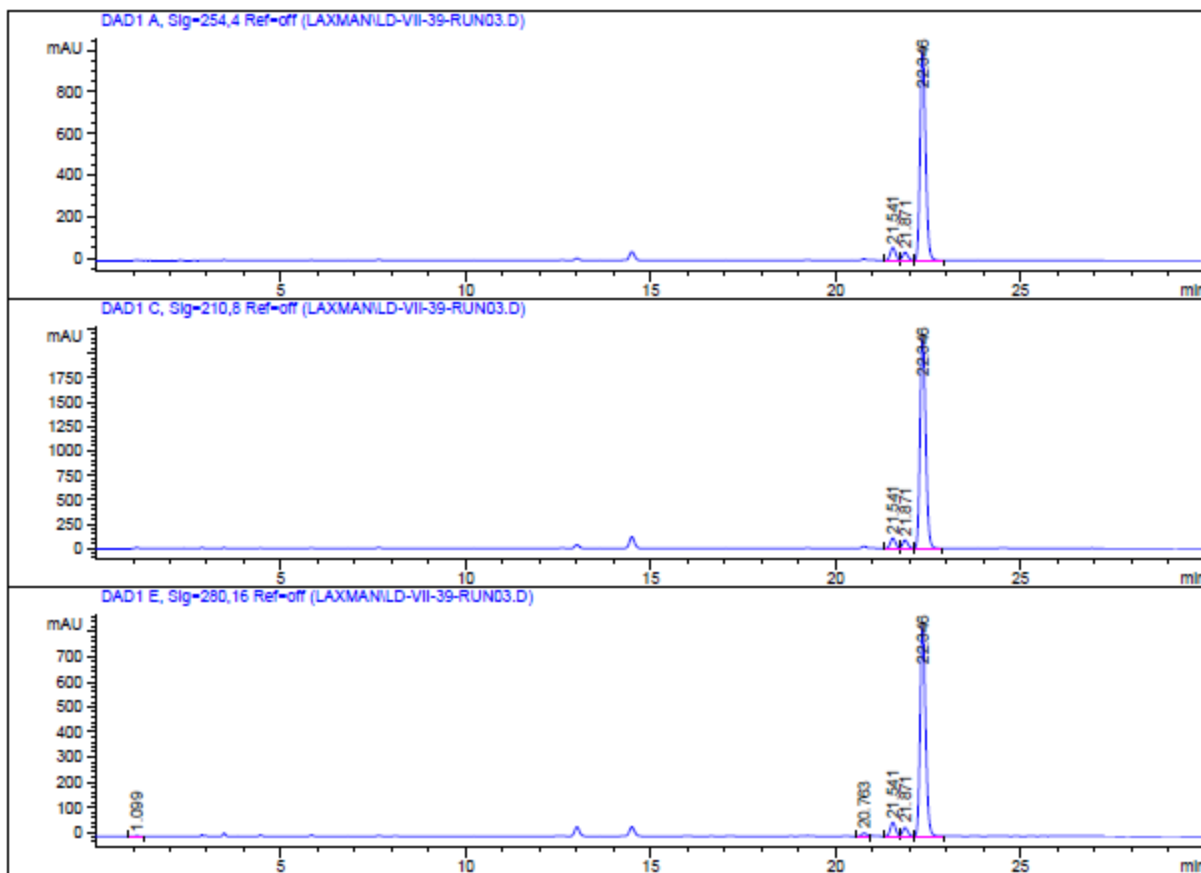

Data File C:\CHEM32\1\DATA\LAXMAN\LD-VII-39-RUN03.D  
Sample Name: LD-VII-39-run3

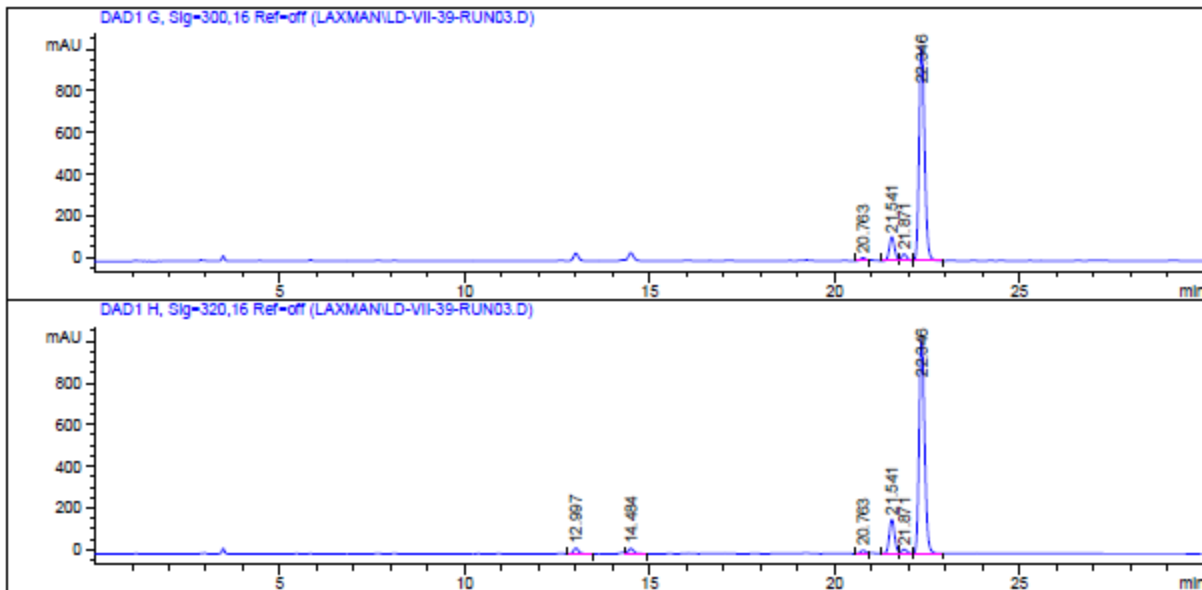

# Area Percent Report

Sorted By : Signal  
Multiplier : 1.0000  
Dilution : 1.0000  
Use Multiplier & Dilution Factor with ISTDs

Signal 1: DAD1 A, Sig=254,4 Ref=off

| Peak # | RetTime [min] | Type | Width [min] | Area [mAU*s] | Height [mAU] | Area %  |
|--------|---------------|------|-------------|--------------|--------------|---------|
| 1      | 21.541        | BV   | 0.1566      | 625.99896    | 62.65627     | 5.4443  |
| 2      | 21.871        | VV   | 0.1579      | 398.06259    | 38.72581     | 3.4619  |
| 3      | 22.346        | VB   | 0.1602      | 1.04742e4    | 1016.64459   | 91.0938 |

Totals : 1.14983e4 1116.02668

Signal 2: DAD1 C, Sig=210,8 Ref=off

| Peak # | RetTime [min] | Type | Width [min] | Area [mAU*s] | Height [mAU] | Area % |
|--------|---------------|------|-------------|--------------|--------------|--------|
| 1      | 21.541        | BV   | 0.1564      | 1048.61108   | 108.09589    | 4.1849 |
| 2      | 21.871        | VV   | 0.1576      | 866.73926    | 84.56084     | 3.4591 |

Data File C:\CHEM32\1\DATA\LAXMAN\LD-VII-39-RUN03.D  
Sample Name: LD-VII-39-run3

| Peak # | RetTime [min] | Type | Width [min] | Area [mAU*s] | Height [mAU] | Area %  |
|--------|---------------|------|-------------|--------------|--------------|---------|
| 3      | 22.346        | VB   | 0.1687      | 2.31415e4    | 2164.44214   | 92.3560 |

Totals : 2.50569e4 2354.09888

Signal 3: DAD1 E, Sig=280,16 Ref=off

| Peak # | RetTime [min] | Type | Width [min] | Area [mAU*s] | Height [mAU] | Area %  |
|--------|---------------|------|-------------|--------------|--------------|---------|
| 1      | 1.099         | BV   | 0.0821      | 22.67783     | 3.88244      | 0.2335  |
| 2      | 20.763        | BV   | 0.1483      | 119.33536    | 12.40154     | 1.2289  |
| 3      | 21.541        | BV   | 0.1567      | 553.77106    | 55.33903     | 5.7025  |
| 4      | 21.871        | VV   | 0.1578      | 351.39407    | 34.20695     | 3.6185  |
| 5      | 22.346        | VB   | 0.1601      | 8663.92285   | 841.87061    | 89.2167 |

Totals : 9711.10117 947.70056

Signal 4: DAD1 G, Sig=300,16 Ref=off

| Peak # | RetTime [min] | Type | Width [min] | Area [mAU*s] | Height [mAU] | Area %  |
|--------|---------------|------|-------------|--------------|--------------|---------|
| 1      | 20.763        | BV   | 0.1474      | 140.45000    | 14.70714     | 1.1420  |
| 2      | 21.541        | BV   | 0.1571      | 1151.50391   | 114.67712    | 9.3632  |
| 3      | 21.871        | VV   | 0.1580      | 327.26285    | 31.81455     | 2.6611  |
| 4      | 22.346        | VB   | 0.1604      | 1.06790e4    | 1034.58325   | 86.8338 |

Totals : 1.22982e4 1195.78207

Signal 5: DAD1 H, Sig=320,16 Ref=off

| Peak # | RetTime [min] | Type | Width [min] | Area [mAU*s] | Height [mAU] | Area %  |
|--------|---------------|------|-------------|--------------|--------------|---------|
| 1      | 12.997        | VB   | 0.1451      | 252.68199    | 27.01931     | 1.9125  |
| 2      | 14.484        | VB   | 0.1580      | 257.79825    | 25.06436     | 1.9512  |
| 3      | 20.763        | BV   | 0.1472      | 158.41324    | 16.62563     | 1.1990  |
| 4      | 21.541        | BV   | 0.1574      | 1657.25757   | 164.71658    | 12.5434 |
| 5      | 21.871        | VV   | 0.1556      | 215.00967    | 20.96922     | 1.6274  |
| 6      | 22.346        | VB   | 0.1605      | 1.06710e4    | 1033.17529   | 80.7665 |

Totals : 1.32122e4 1287.57039

Data File C:\CHEM32\1\DATA\LAXMAN\LD-VII-39-RUN03.D  
Sample Name: LD-VII-39-run3

=====  
\*\*\* End of Report \*\*\*

# Mass Spectrum of Compound 26

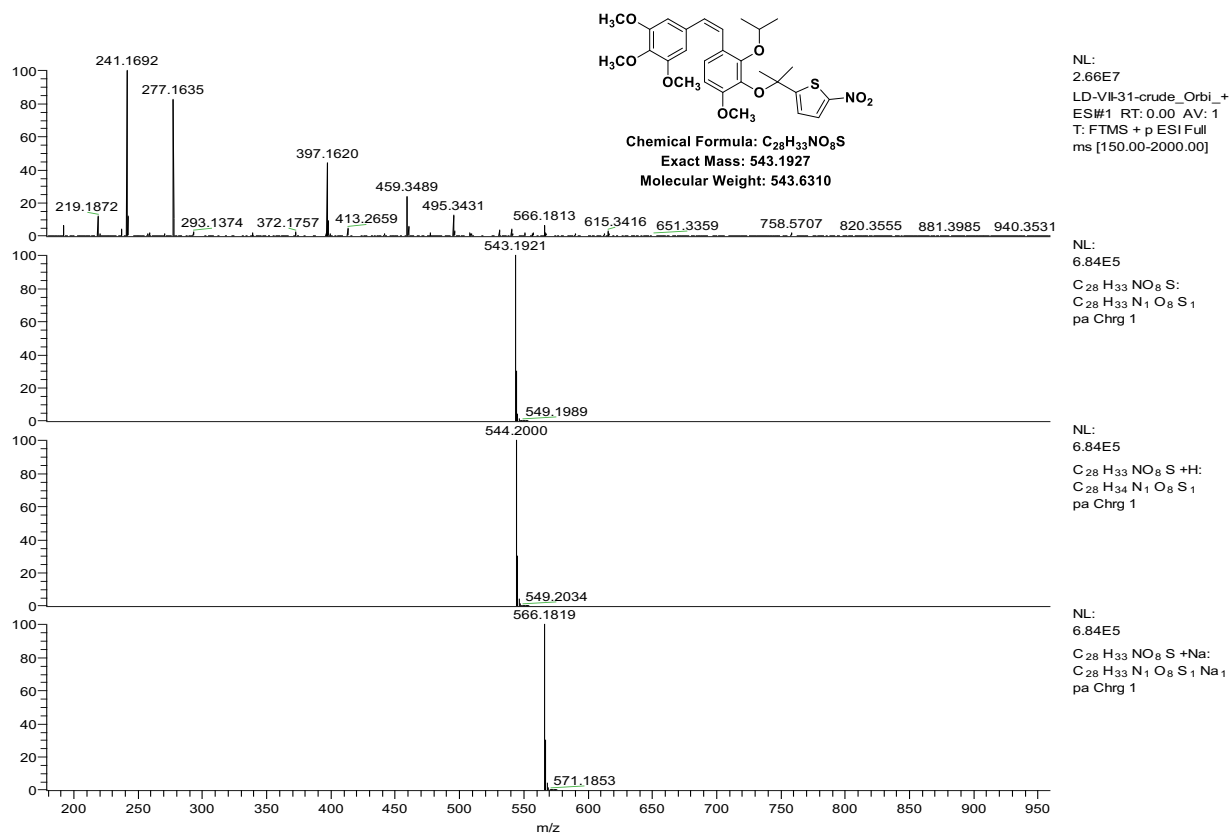

<sup>1</sup>H NMR (500 MHz, CDCl<sub>3</sub>) for Compounds **27** and **28**

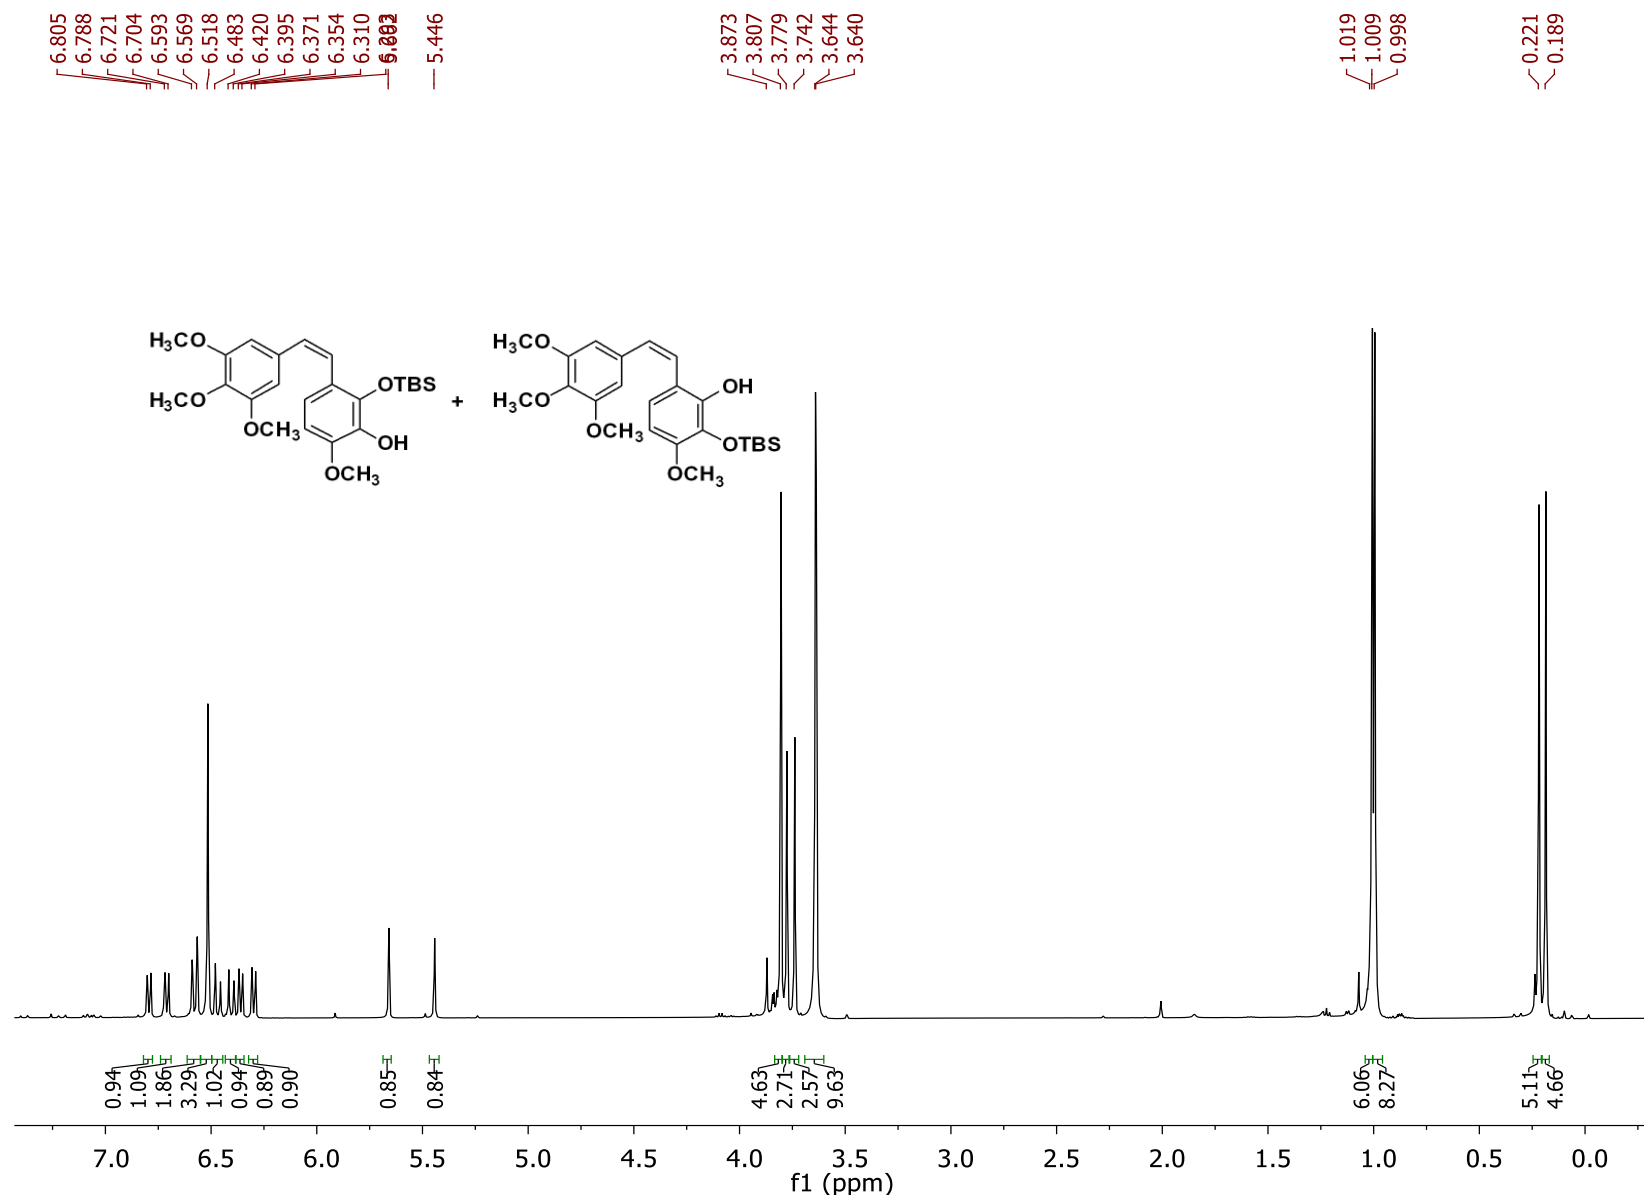

$^{13}\text{C}$  NMR (125 MHz,  $\text{CDCl}_3$ ) for Compounds **27** and **28**

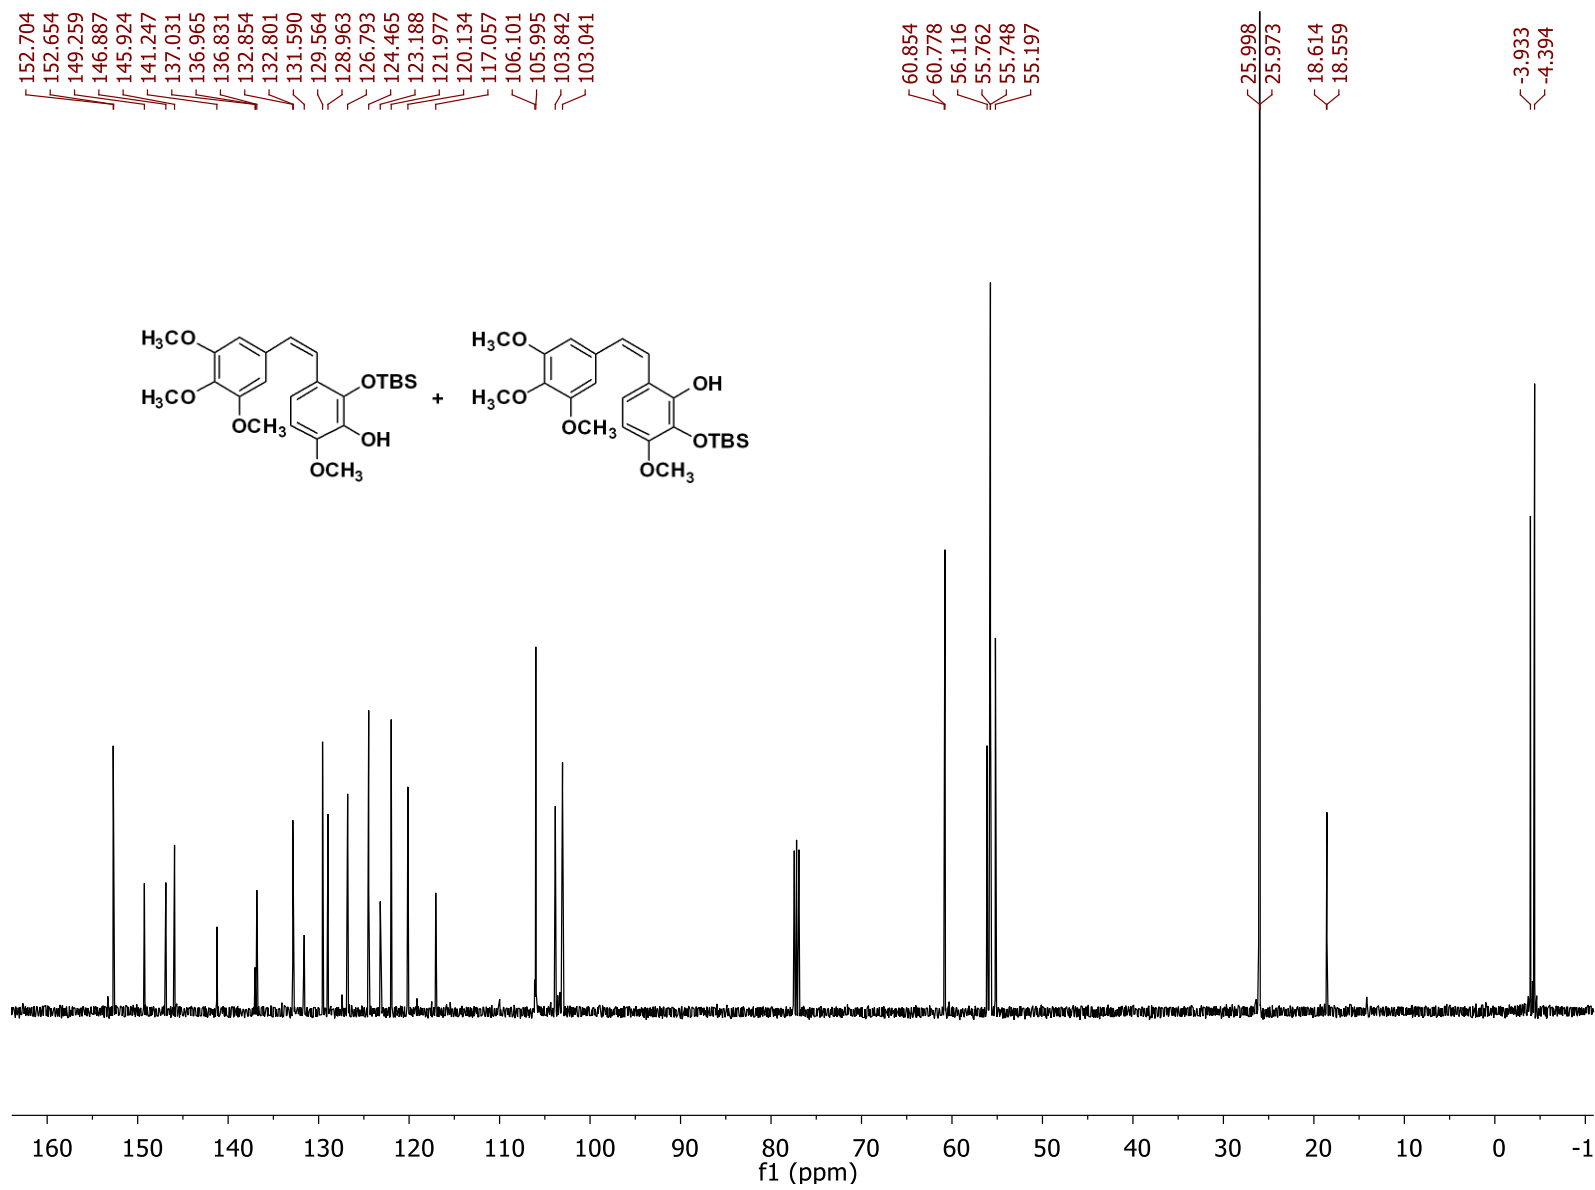

<sup>1</sup>H NMR (500 MHz, CDCl<sub>3</sub>) for Compound **29**

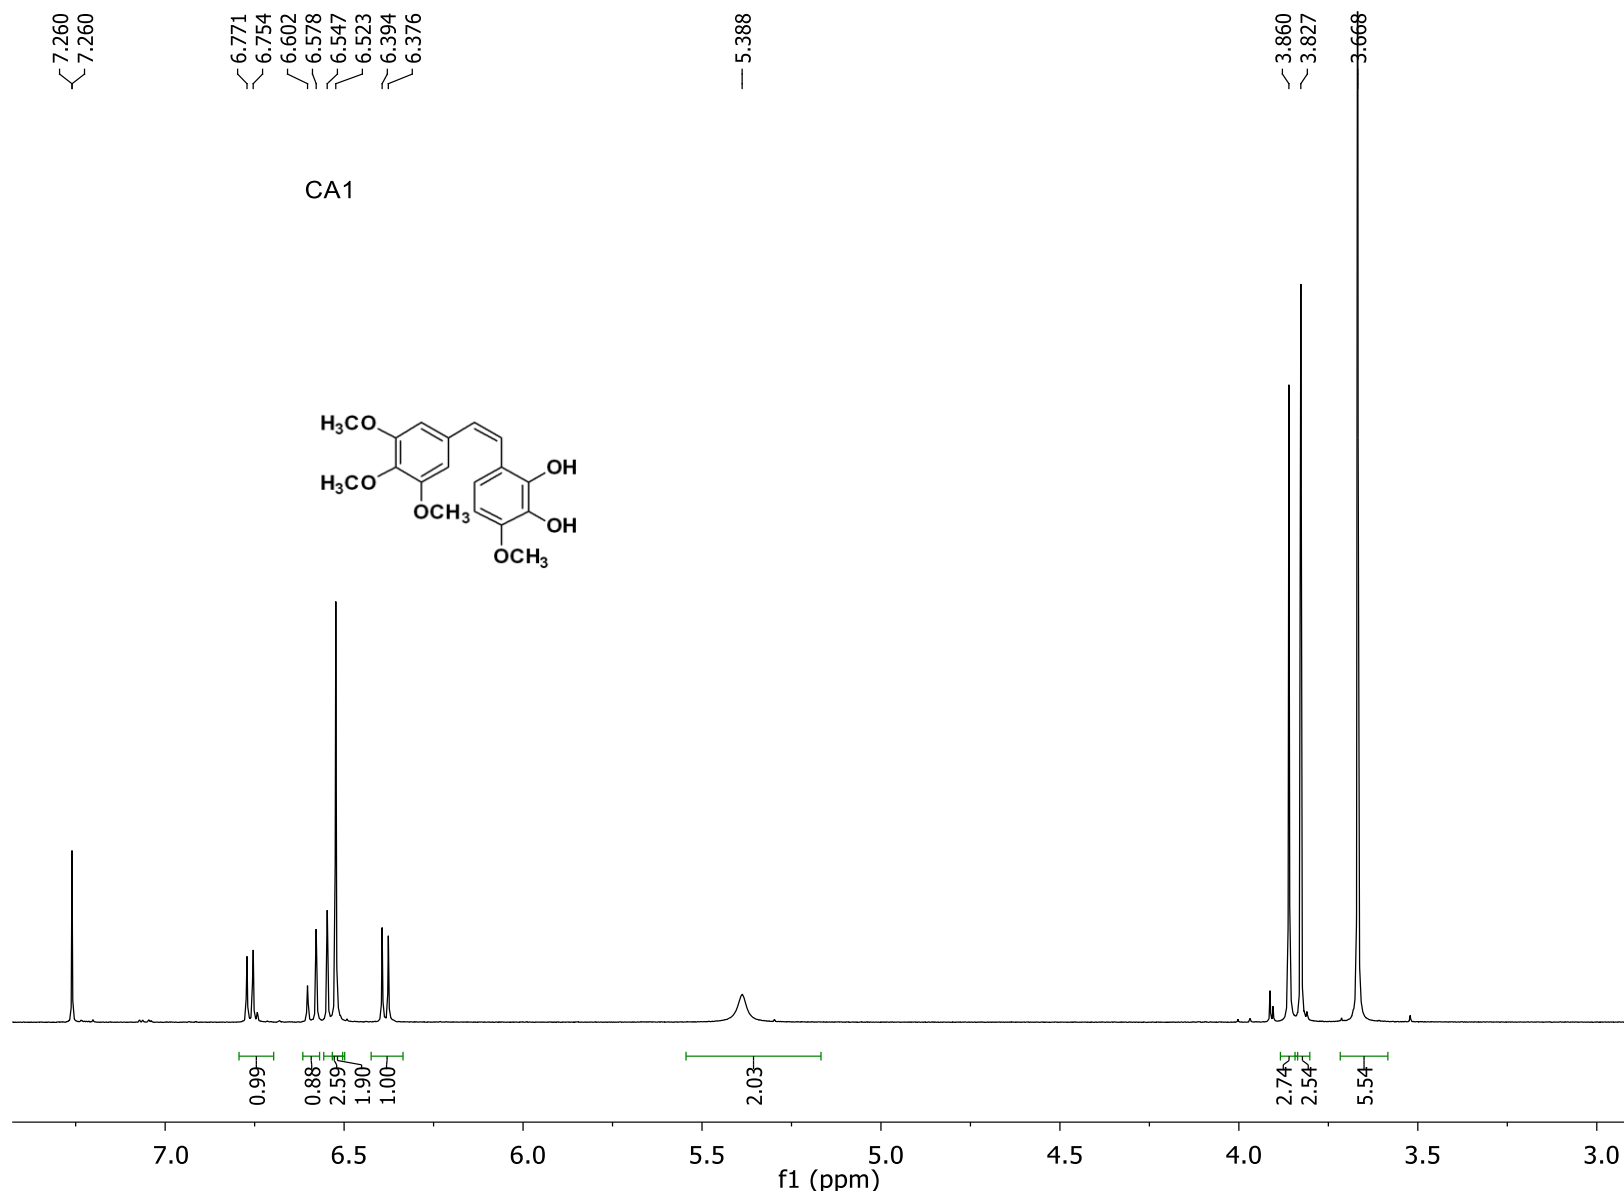

<sup>13</sup>C NMR (125 MHz, CDCl<sub>3</sub>) for Compound **29**

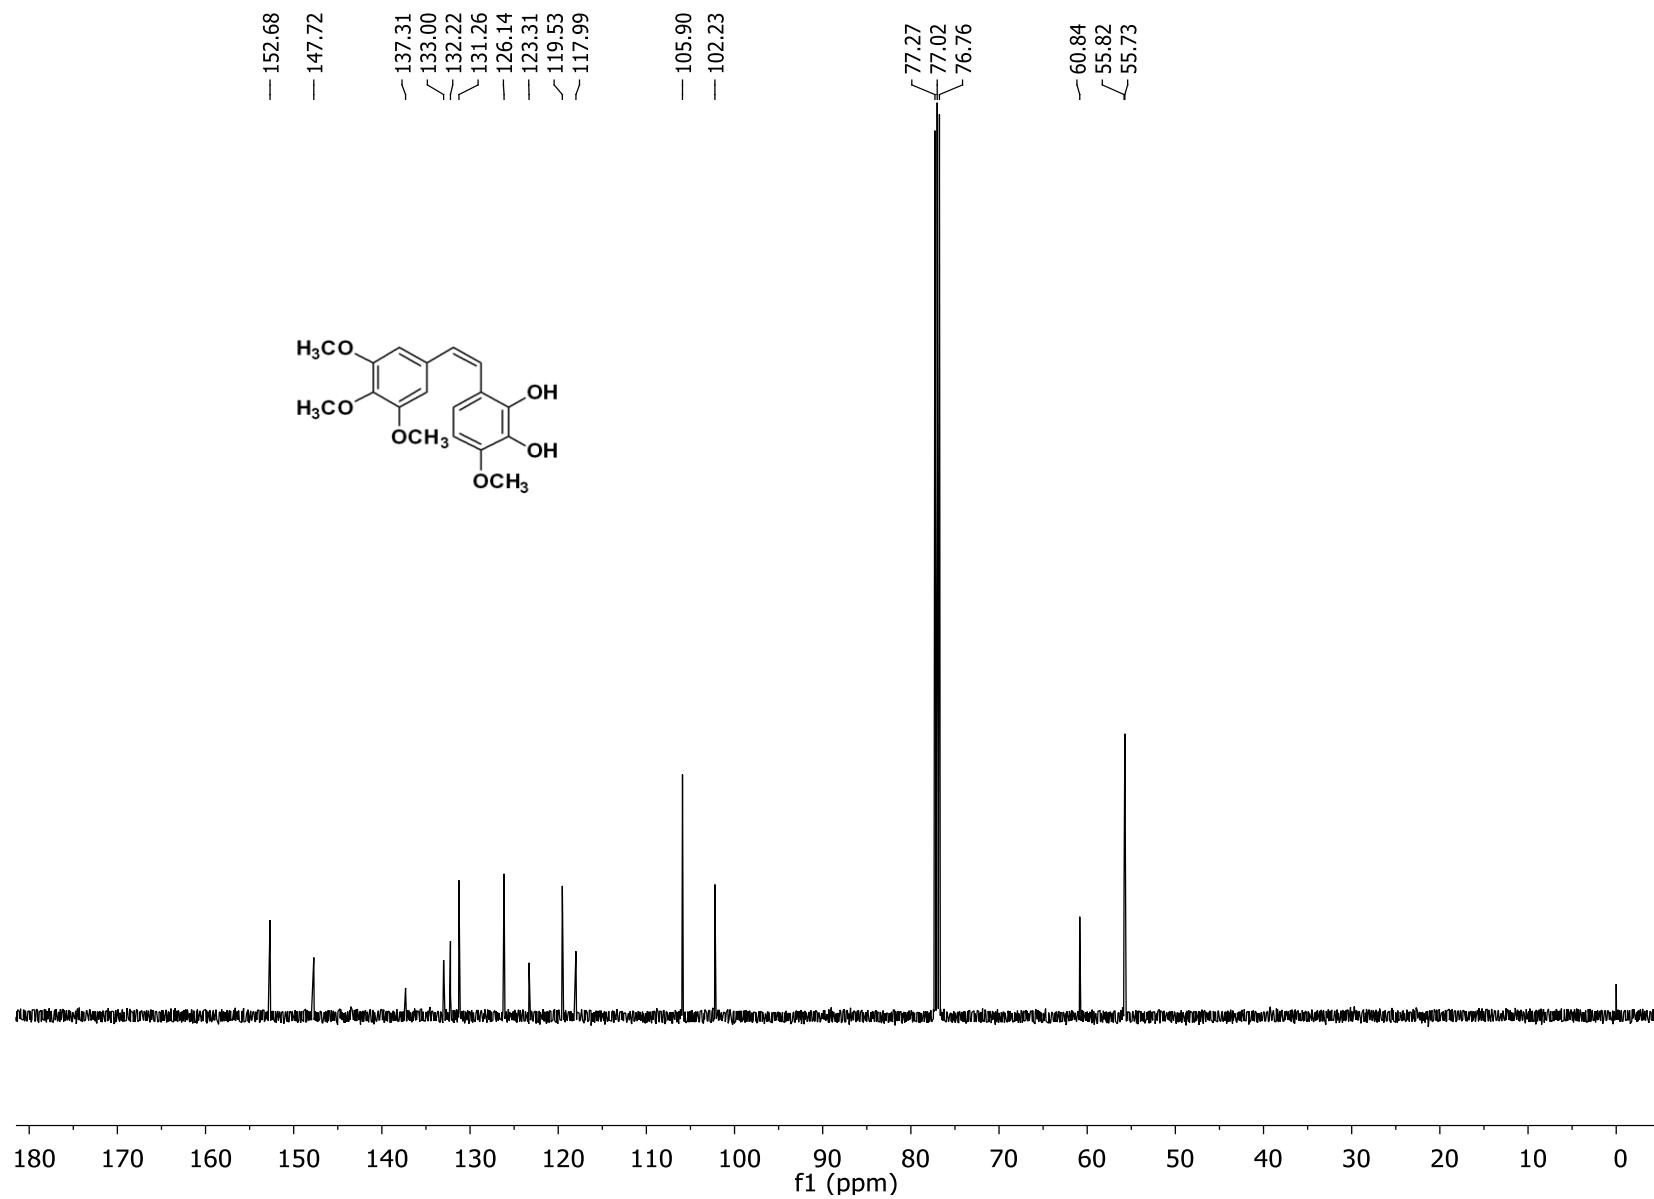

## HPLC Traces of Compound 29

Data File C:\CHEM32\1\DATA\LAXMAN\BLANK2-II-14103.D

Sample Name: LD-II-141-1blank2

```
=====
Acq. Operator   : Laxman
Acq. Instrument : Instrument 1           Location :   -
Injection Date  : 10/31/2012 1:13:11 PM
Acq. Method     : C:\CHEM32\1\METHODS\MASTERMETHOD.M
Last changed    : 10/31/2012 10:10:23 AM by Laxman
Analysis Method : C:\CHEM32\1\DATA\LAXMAN\BLANK2-II-14103.D\DA.M (MASTERMETHOD.M)
Last changed    : 10/31/2012 2:13:03 PM by Laxman
Sample Info     : 10% ACN in water
```

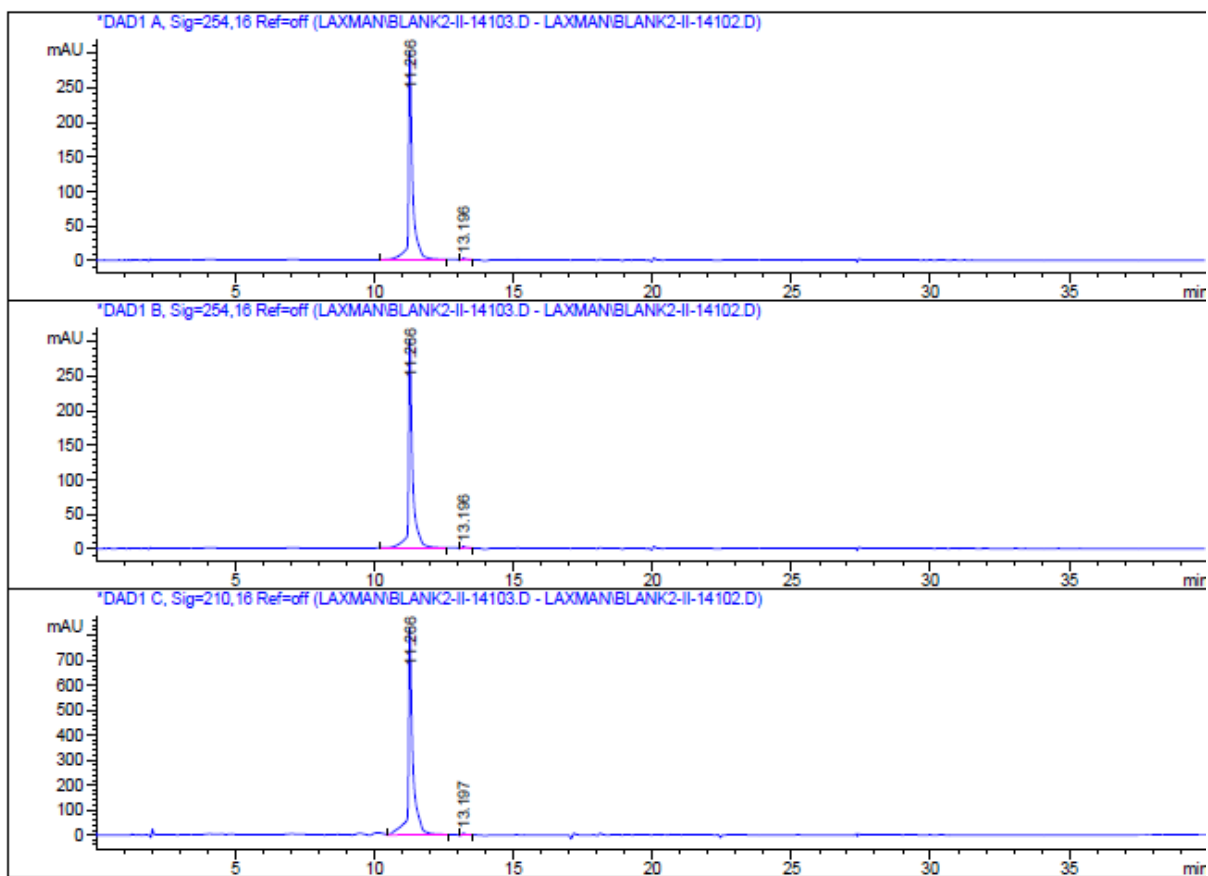

Data File C:\CHEM32\1\DATA\LAXMAN\BLANK2-II-14103.D  
Sample Name: LD-II-141-1blank2

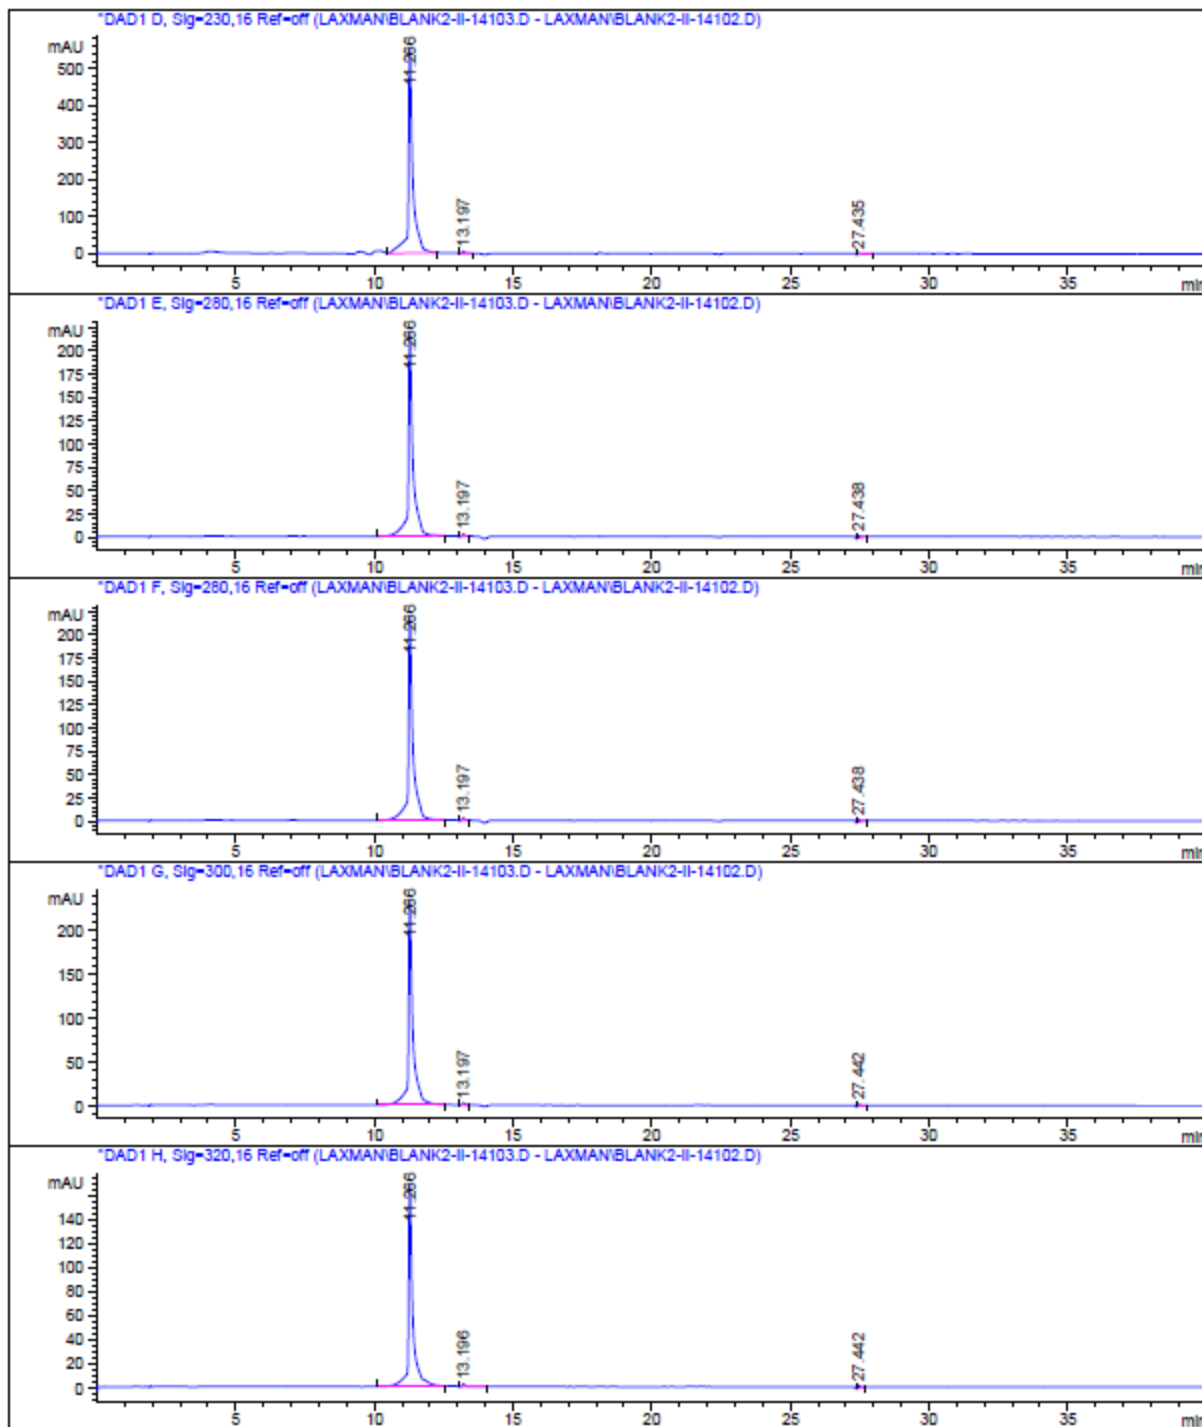

Data File C:\CHEM32\1\DATA\LAXMAN\BLANK2-II-14103.D  
Sample Name: LD-II-141-1blank2

=====  
Area Percent Report  
=====

Sorted By : Signal  
Multiplier : 1.0000  
Dilution : 1.0000  
Use Multiplier & Dilution Factor with ISTDs

Signal 1: DAD1 A, Sig=254,16 Ref=off  
Signal has been modified after loading from rawdata file!

| Peak # | RetTime [min] | Type | Width [min] | Area [mAU*s] | Height [mAU] | Area %  |
|--------|---------------|------|-------------|--------------|--------------|---------|
| 1      | 11.266        | BB   | 0.1372      | 3040.83838   | 302.59622    | 99.2215 |
| 2      | 13.196        | BB   | 0.1167      | 23.85802     | 2.93930      | 0.7785  |

Totals : 3064.69640 305.53552

Signal 2: DAD1 B, Sig=254,16 Ref=off  
Signal has been modified after loading from rawdata file!

| Peak # | RetTime [min] | Type | Width [min] | Area [mAU*s] | Height [mAU] | Area %  |
|--------|---------------|------|-------------|--------------|--------------|---------|
| 1      | 11.266        | BB   | 0.1372      | 3040.83838   | 302.59622    | 99.2215 |
| 2      | 13.196        | BB   | 0.1167      | 23.85802     | 2.93930      | 0.7785  |

Totals : 3064.69640 305.53552

Signal 3: DAD1 C, Sig=210,16 Ref=off  
Signal has been modified after loading from rawdata file!

| Peak # | RetTime [min] | Type | Width [min] | Area [mAU*s] | Height [mAU] | Area %  |
|--------|---------------|------|-------------|--------------|--------------|---------|
| 1      | 11.266        | VB   | 0.1514      | 9399.36523   | 834.36102    | 99.2611 |
| 2      | 13.197        | BB   | 0.1183      | 69.97166     | 8.47993      | 0.7389  |

Totals : 9469.33689 842.84096

Data File C:\CHEM32\1\DATA\LAXMAN\BLANK2-II-14103.D  
Sample Name: LD-II-141-1blank2

Signal 4: DAD1 D, Sig=230,16 Ref=off

Signal has been modified after loading from rawdata file!

| Peak # | RetTime [min] | Type | Width [min] | Area [mAU*s] | Height [mAU] | Area %  |
|--------|---------------|------|-------------|--------------|--------------|---------|
| 1      | 11.266        | VB   | 0.1531      | 6351.90918   | 556.84320    | 98.0392 |
| 2      | 13.197        | BB   | 0.1182      | 53.54675     | 6.49505      | 0.8265  |
| 3      | 27.435        | BB   | 0.1898      | 73.49426     | 5.11005      | 1.1344  |

Totals : 6478.95018 568.44830

Signal 5: DAD1 E, Sig=280,16 Ref=off

Signal has been modified after loading from rawdata file!

| Peak # | RetTime [min] | Type | Width [min] | Area [mAU*s] | Height [mAU] | Area %  |
|--------|---------------|------|-------------|--------------|--------------|---------|
| 1      | 11.266        | BB   | 0.1545      | 2534.90454   | 219.80244    | 98.0531 |
| 2      | 13.197        | BB   | 0.1035      | 18.30730     | 2.62107      | 0.7081  |
| 3      | 27.438        | BB   | 0.1365      | 32.02457     | 3.32076      | 1.2387  |

Totals : 2585.23642 225.74427

Signal 6: DAD1 F, Sig=280,16 Ref=off

Signal has been modified after loading from rawdata file!

| Peak # | RetTime [min] | Type | Width [min] | Area [mAU*s] | Height [mAU] | Area %  |
|--------|---------------|------|-------------|--------------|--------------|---------|
| 1      | 11.266        | BB   | 0.1545      | 2534.90454   | 219.80244    | 98.0531 |
| 2      | 13.197        | BB   | 0.1035      | 18.30730     | 2.62107      | 0.7081  |
| 3      | 27.438        | BB   | 0.1365      | 32.02457     | 3.32076      | 1.2387  |

Totals : 2585.23642 225.74427

Signal 7: DAD1 G, Sig=300,16 Ref=off

Signal has been modified after loading from rawdata file!

| Peak # | RetTime [min] | Type | Width [min] | Area [mAU*s] | Height [mAU] | Area %  |
|--------|---------------|------|-------------|--------------|--------------|---------|
| 1      | 11.266        | BB   | 0.1517      | 2648.87939   | 234.58089    | 98.3005 |
| 2      | 13.197        | BB   | 0.1041      | 19.77978     | 2.81020      | 0.7340  |
| 3      | 27.442        | BB   | 0.1246      | 26.01523     | 2.74336      | 0.9654  |

Data File C:\CHEM32\1\DATA\LAXMAN\BLANK2-II-14103.D  
Sample Name: LD-II-141-1blank2

Totals : 2694.67441 240.13445

Signal 8: DAD1 H, Sig=320,16 Ref=off  
Signal has been modified after loading from rawdata file!

| Peak # | RetTime [min] | Type | Width [min] | Area [mAU*s] | Height [mAU] | Area %  |
|--------|---------------|------|-------------|--------------|--------------|---------|
| 1      | 11.266        | BB   | 0.1474      | 1847.67163   | 169.15536    | 97.3511 |
| 2      | 13.196        | BB   | 0.1628      | 29.10647     | 2.41100      | 1.5336  |
| 3      | 27.442        | BB   | 0.1115      | 21.16774     | 2.53313      | 1.1153  |

Totals : 1897.94584 174.09949

=====  
\*\*\* End of Report \*\*\*

## Mass Spectrum of Compound 29

LD-25-1A-5\_05 #21 RT: 0.16 AV: 1 NL: 168E7  
T: FTMS +p ES/Fulms (100.00-1000.00)

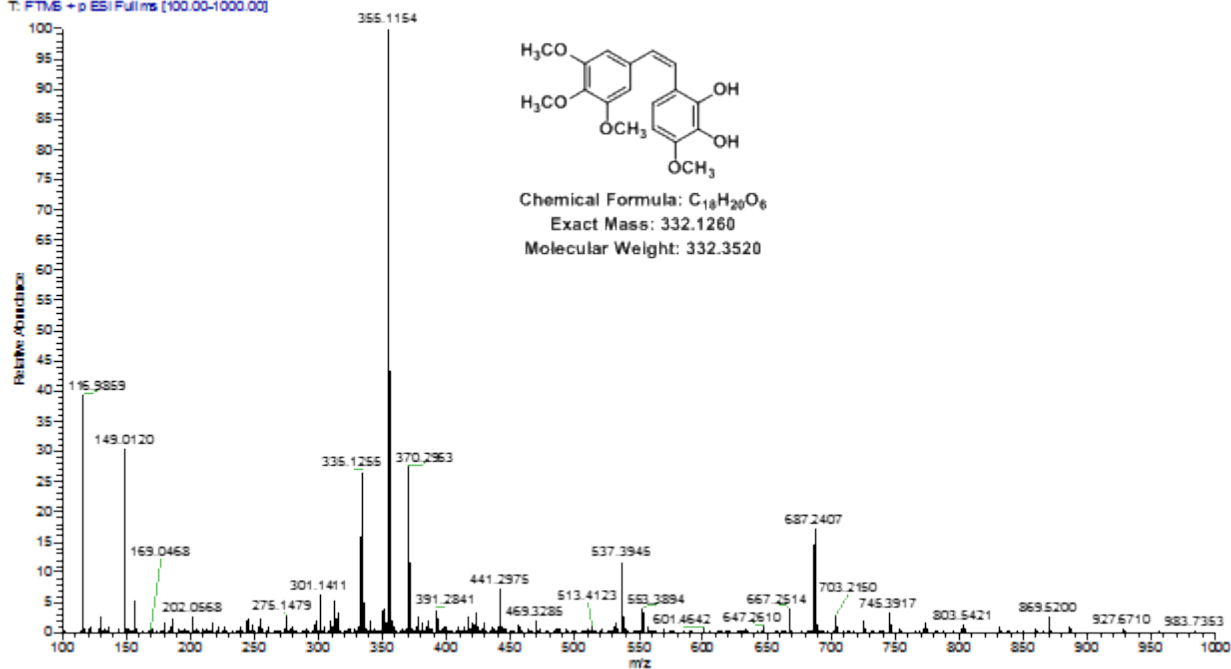

LD-25-1A-5\_05 #20 RT: 0.26 AV: 1 NL: 5.48E5  
T: FTMS +p ES/Fulms (100.00-1000.00)

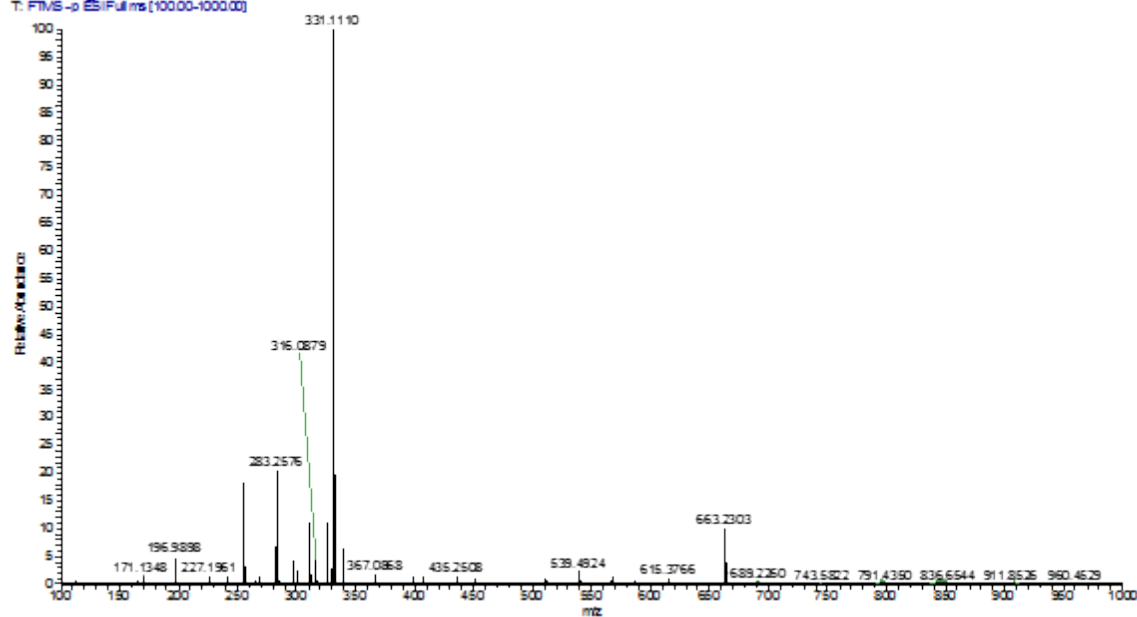

<sup>1</sup>H NMR (600 MHz, CDCl<sub>3</sub>) for Compound **30**

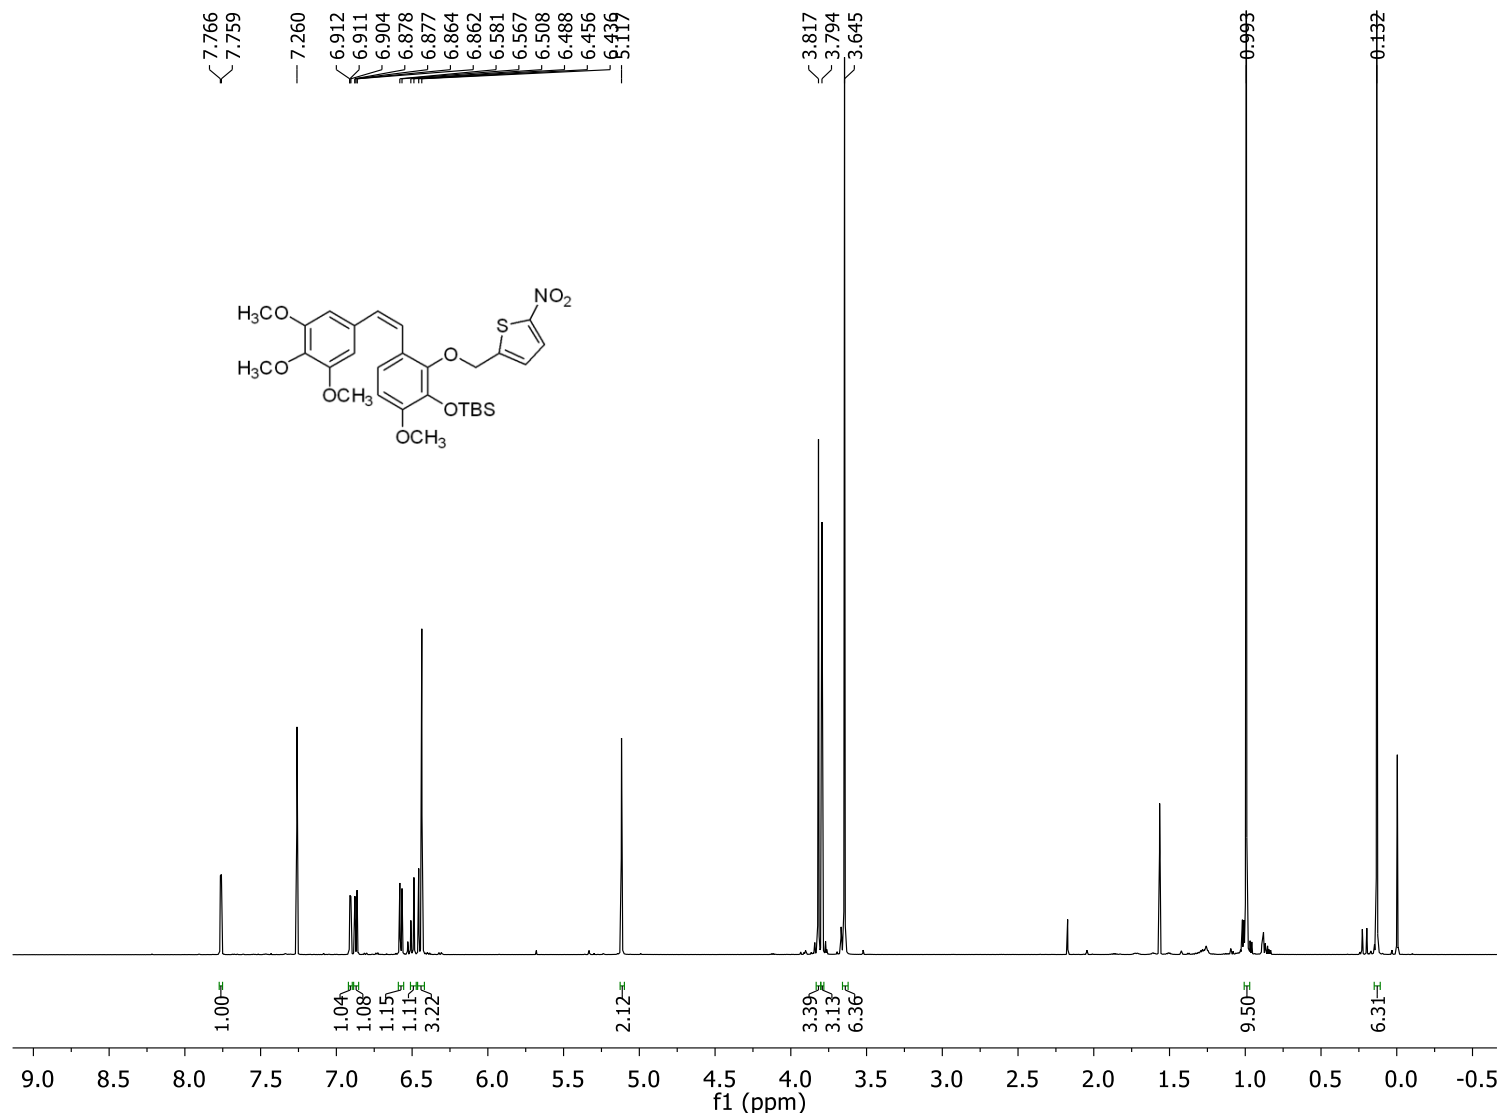

Chemical structure of compound 10 is shown above the spectrum. The structure is a bis-phenol derivative with a central biphenyl core. The left phenyl ring is substituted with a methoxy group (H<sub>3</sub>CO) and a methoxymethyl group (OCH<sub>3</sub>). The right phenyl ring is substituted with a methoxymethyl group (OCH<sub>3</sub>) and a tert-butyldimethylsilyl (OTBS) group. The central biphenyl core is substituted with a methoxymethyl group (OCH<sub>3</sub>) and a tert-butyldimethylsilyl (OTBS) group. The chemical structure is shown with the following substituents: H<sub>3</sub>CO, OCH<sub>3</sub>, OCH<sub>3</sub>, OTBS, and OTBS.

<sup>13</sup>C NMR spectrum (CDCl<sub>3</sub>) of compound 10. The x-axis represents the chemical shift in ppm, ranging from -10 to 150. The spectrum shows several sharp peaks corresponding to the carbon atoms in the molecule. The peak list is as follows:

| Chemical Shift (ppm) |
|----------------------|
| 152.697              |
| 151.647              |
| 151.443              |
| 148.599              |
| 147.571              |
| 138.378              |
| 137.130              |
| 132.407              |
| 130.365              |
| 128.195              |
| 125.146              |
| 124.860              |
| 124.435              |
| 122.295              |
| 107.486              |
| 105.954              |
| 68.545               |
| 60.883               |
| 55.768               |
| 55.416               |
| 25.778               |
| 18.611               |
| 4.573                |

<sup>1</sup>H NMR (500 MHz, CDCl<sub>3</sub>) of Compound **31**

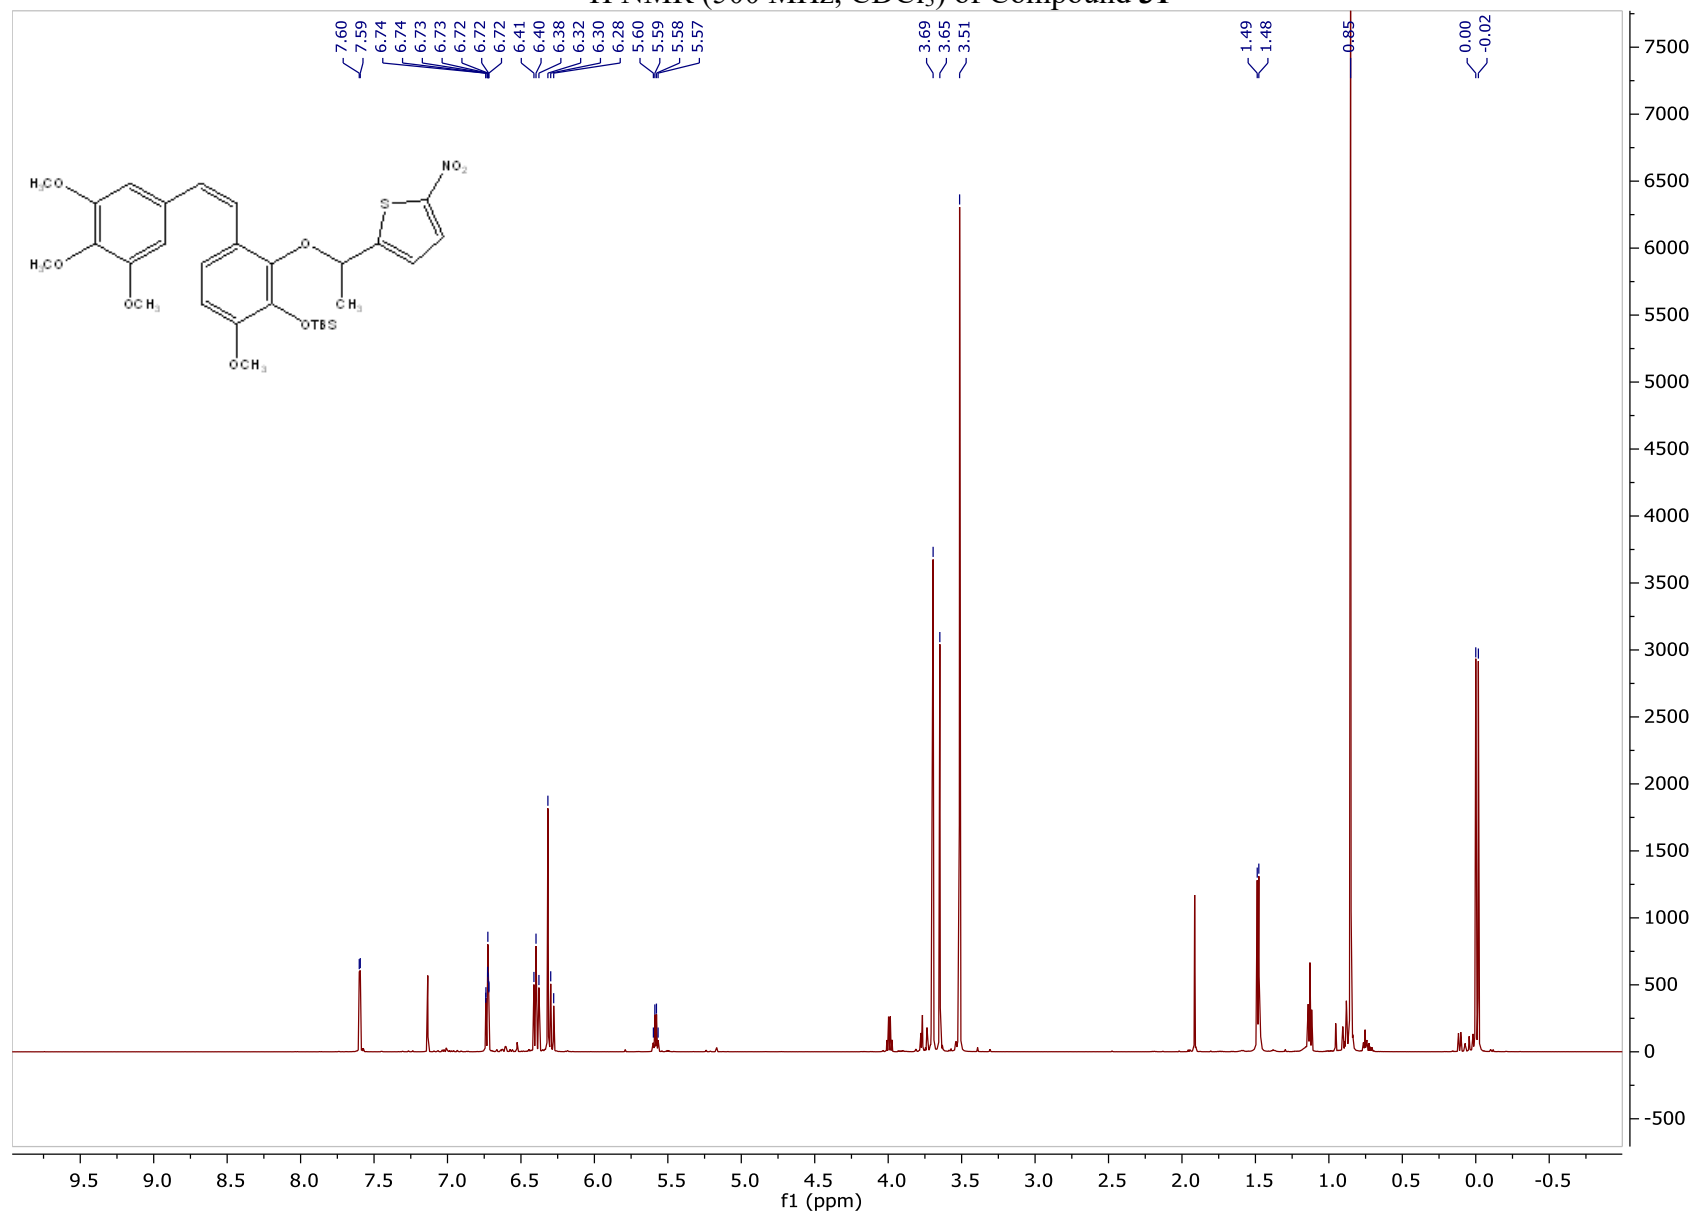

<sup>13</sup>C NMR (500 MHz, CDCl<sub>3</sub>) of Compound **31**

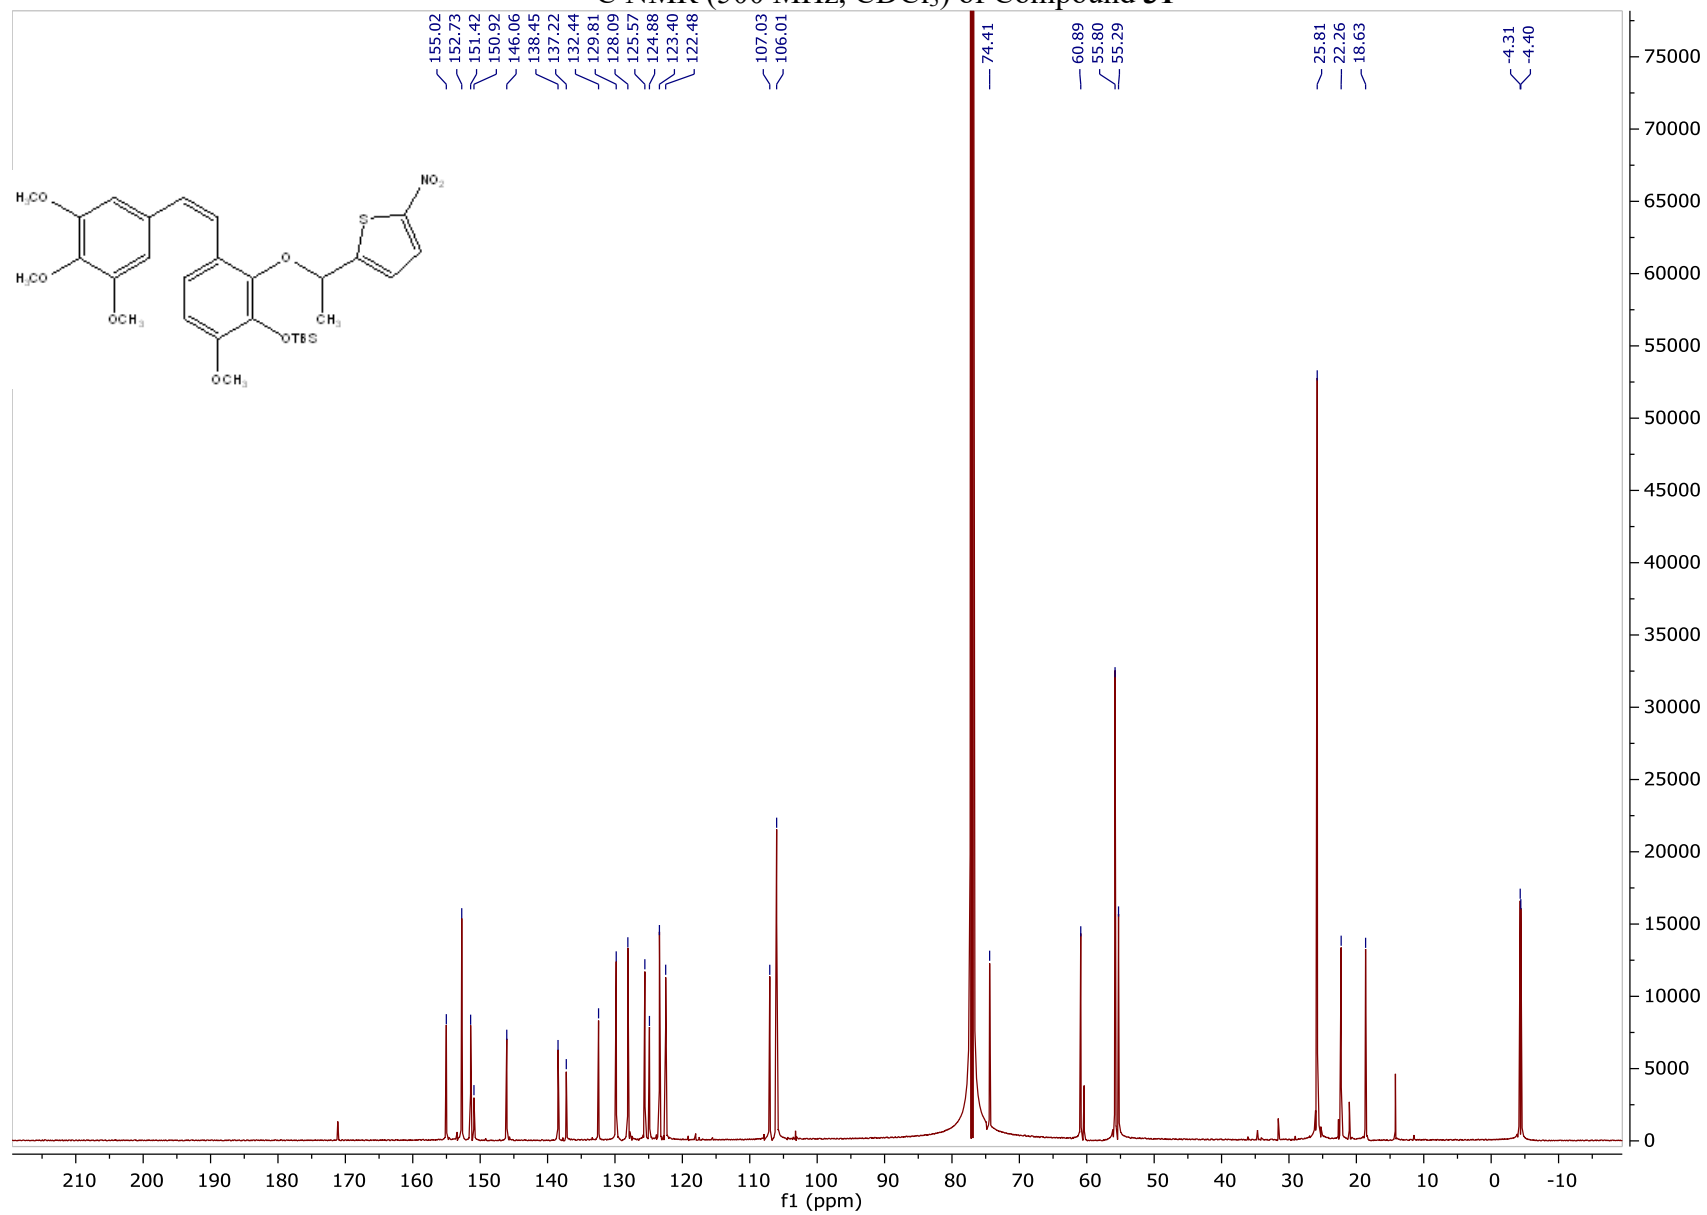

<sup>1</sup>H NMR (600 MHz, CDCl<sub>3</sub>) for Compound **33**

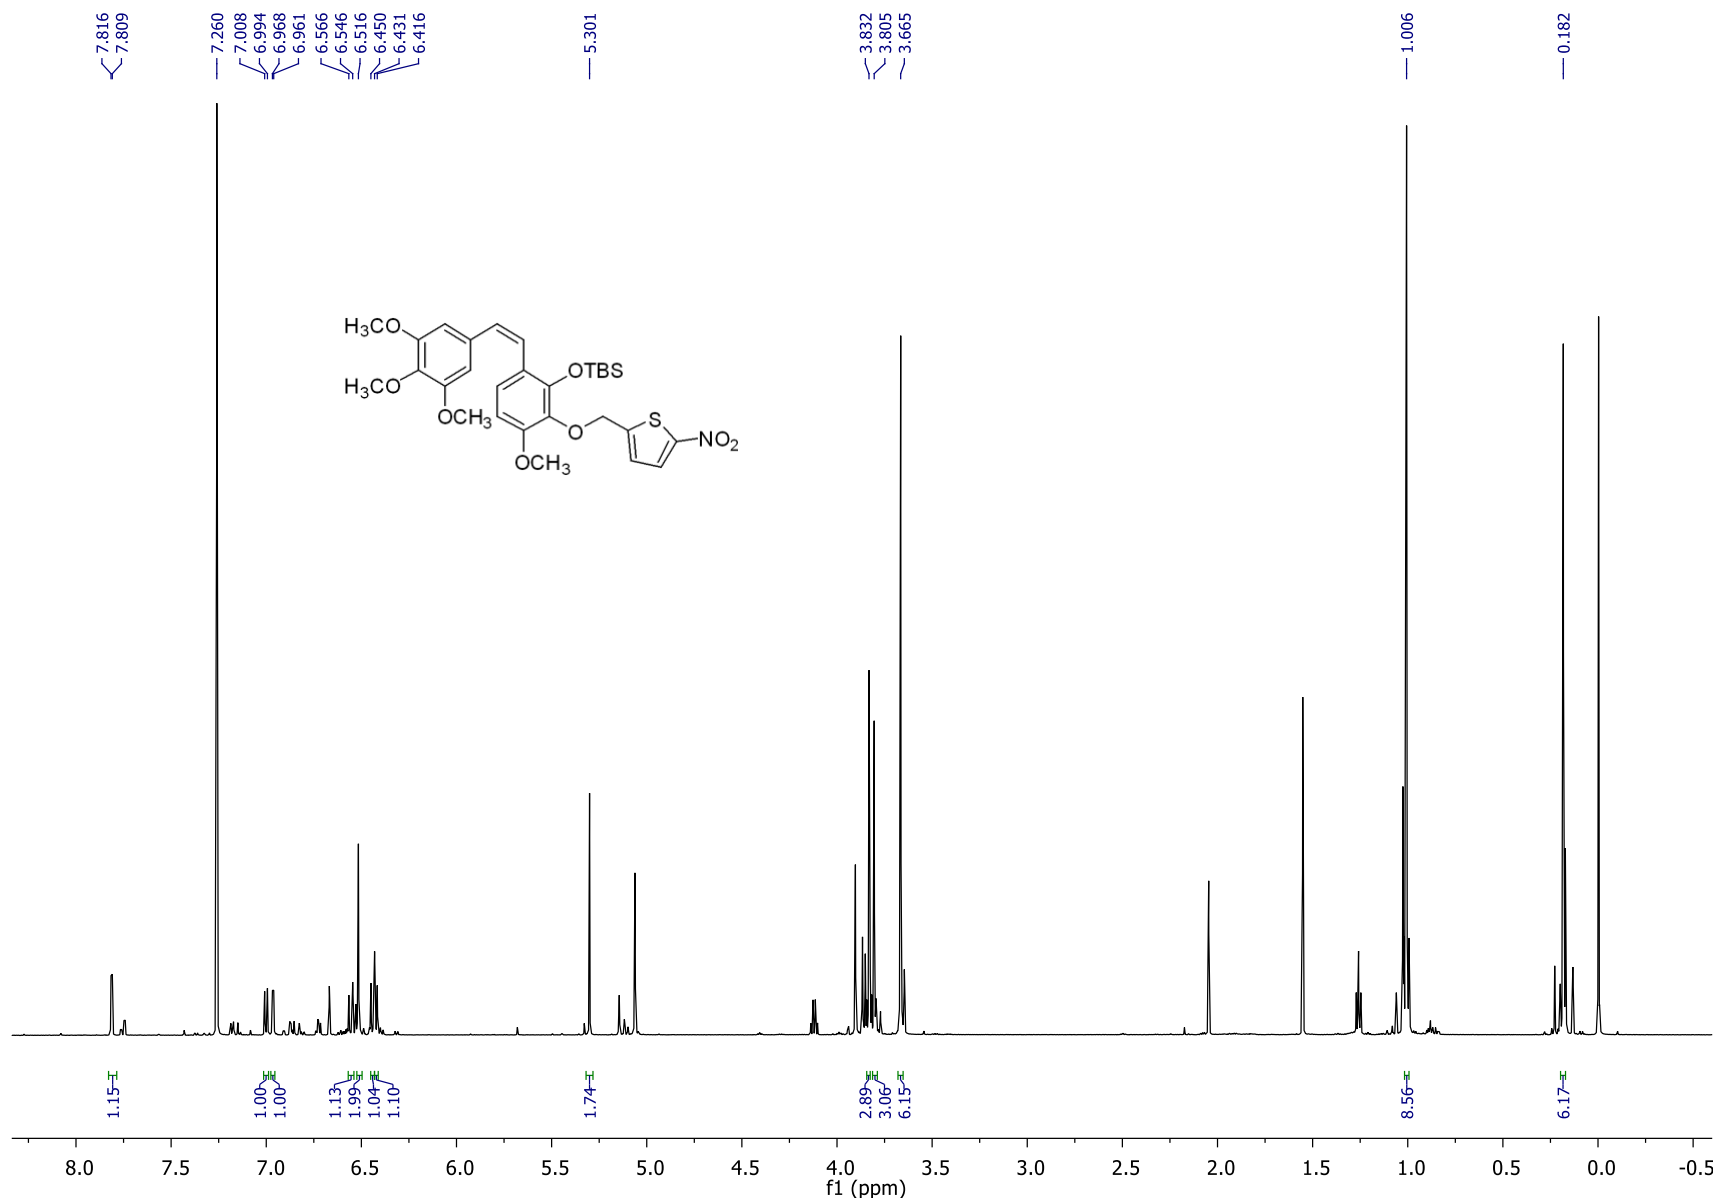

<sup>13</sup>C NMR (151 MHz, CDCl<sub>3</sub>) for Compound **33**

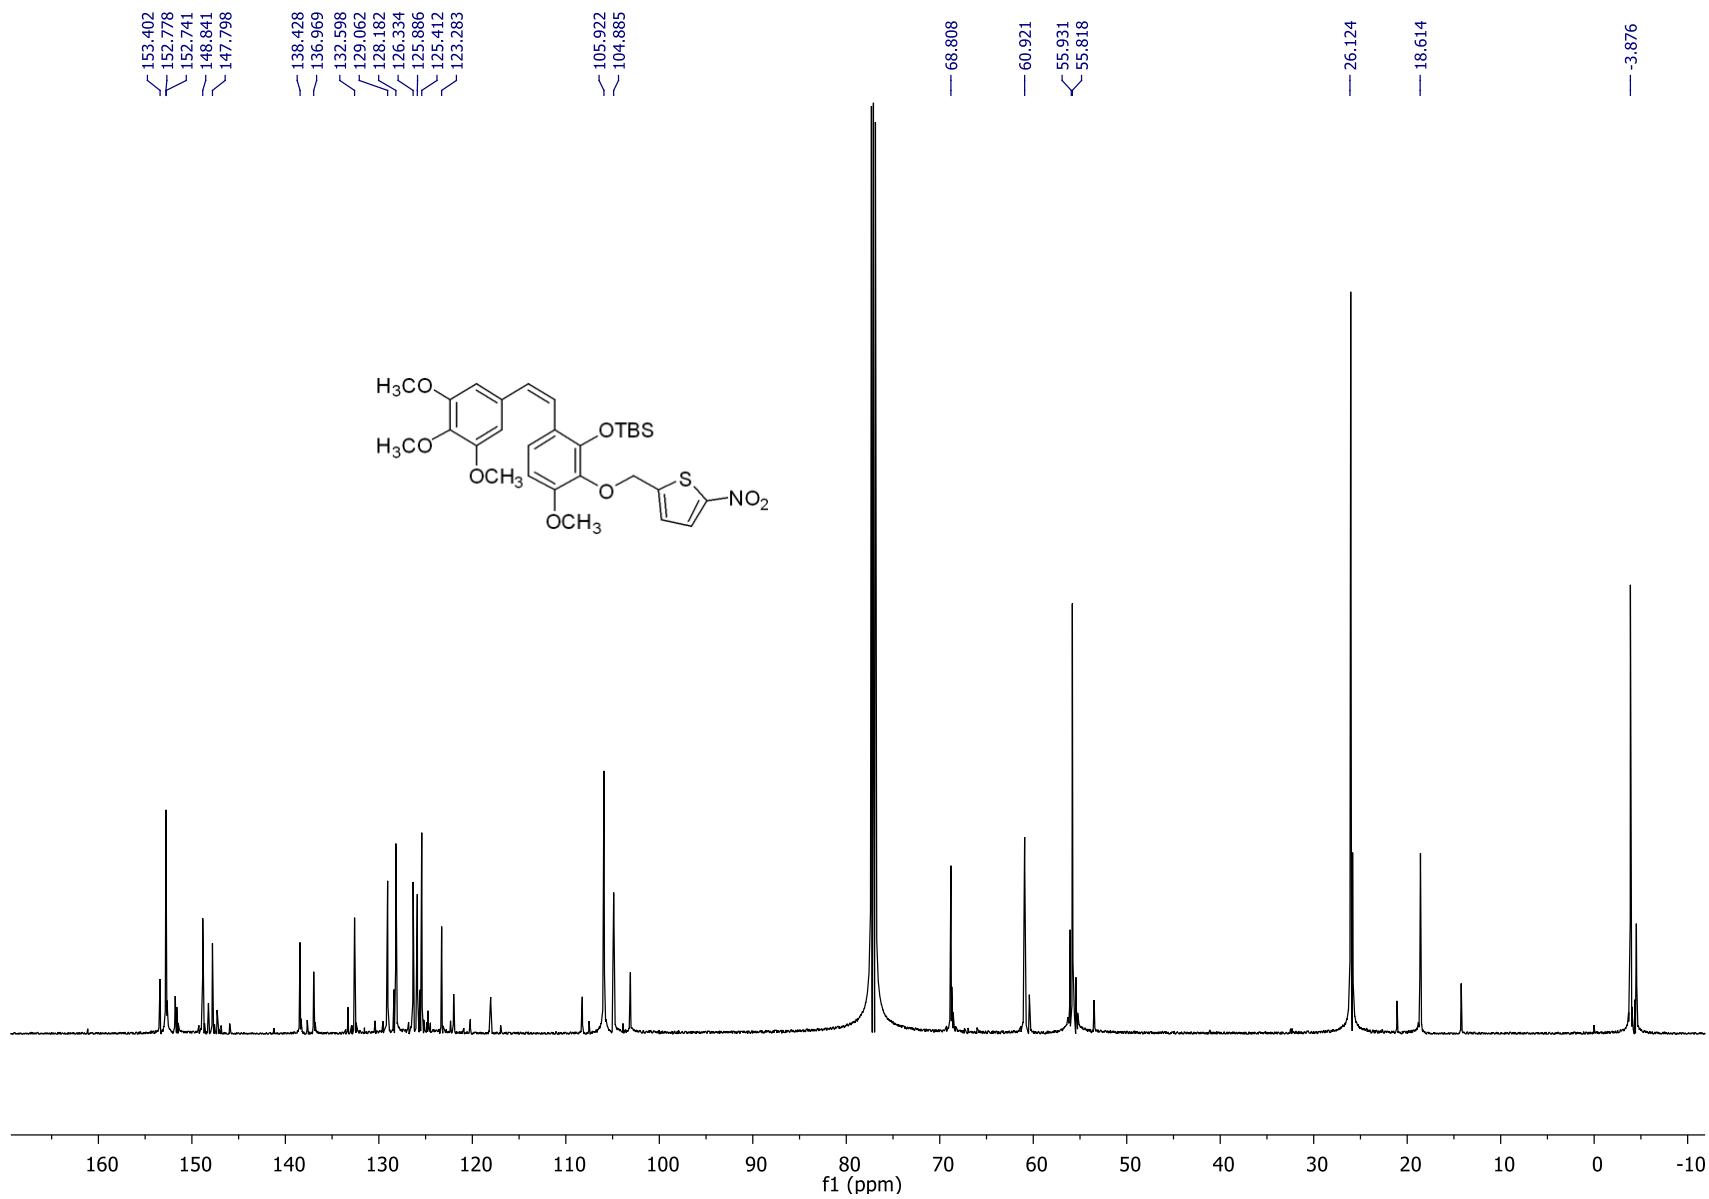

S101

<sup>1</sup>H NMR (500 MHz, CDCl<sub>3</sub>) of Compound **34**

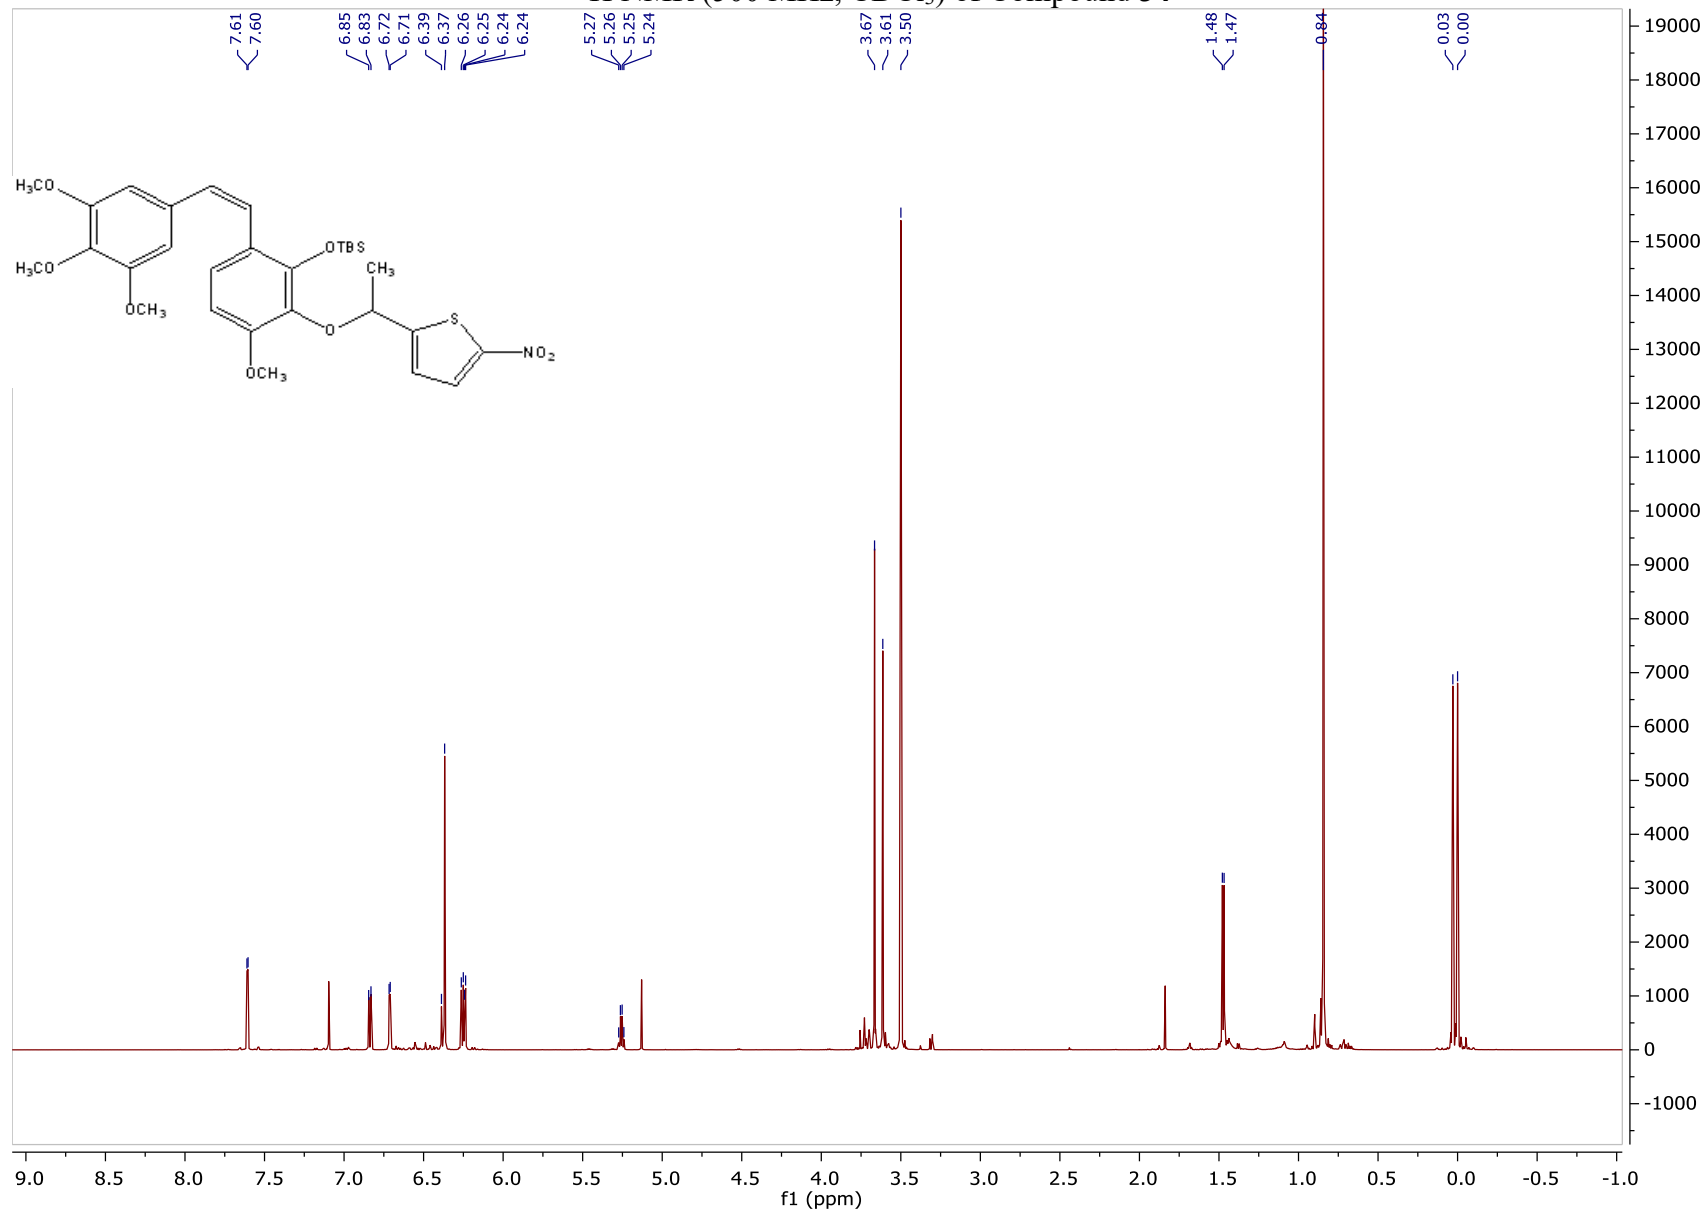

<sup>13</sup>C NMR (500 MHz, CDCl<sub>3</sub>) of Compound **34**

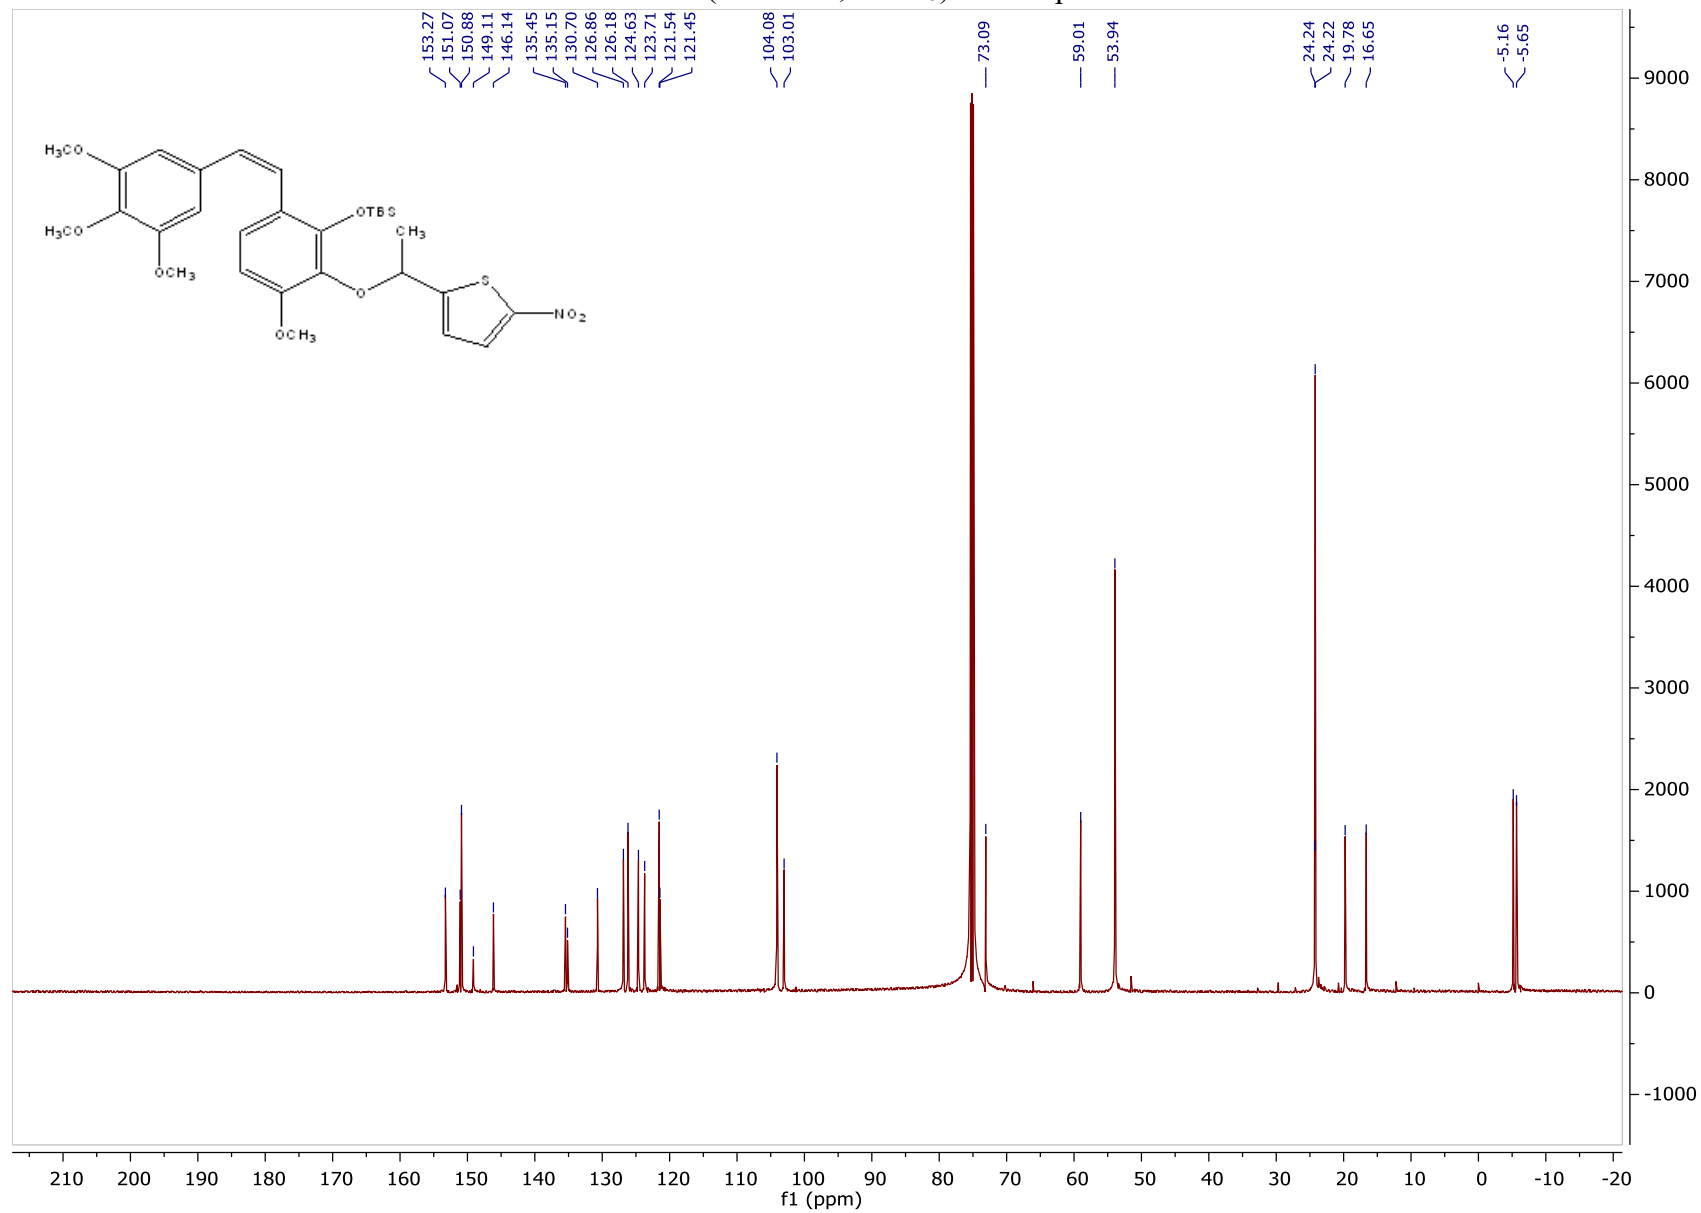

<sup>1</sup>H NMR (500 MHz, CDCl<sub>3</sub>) for Compound **35**

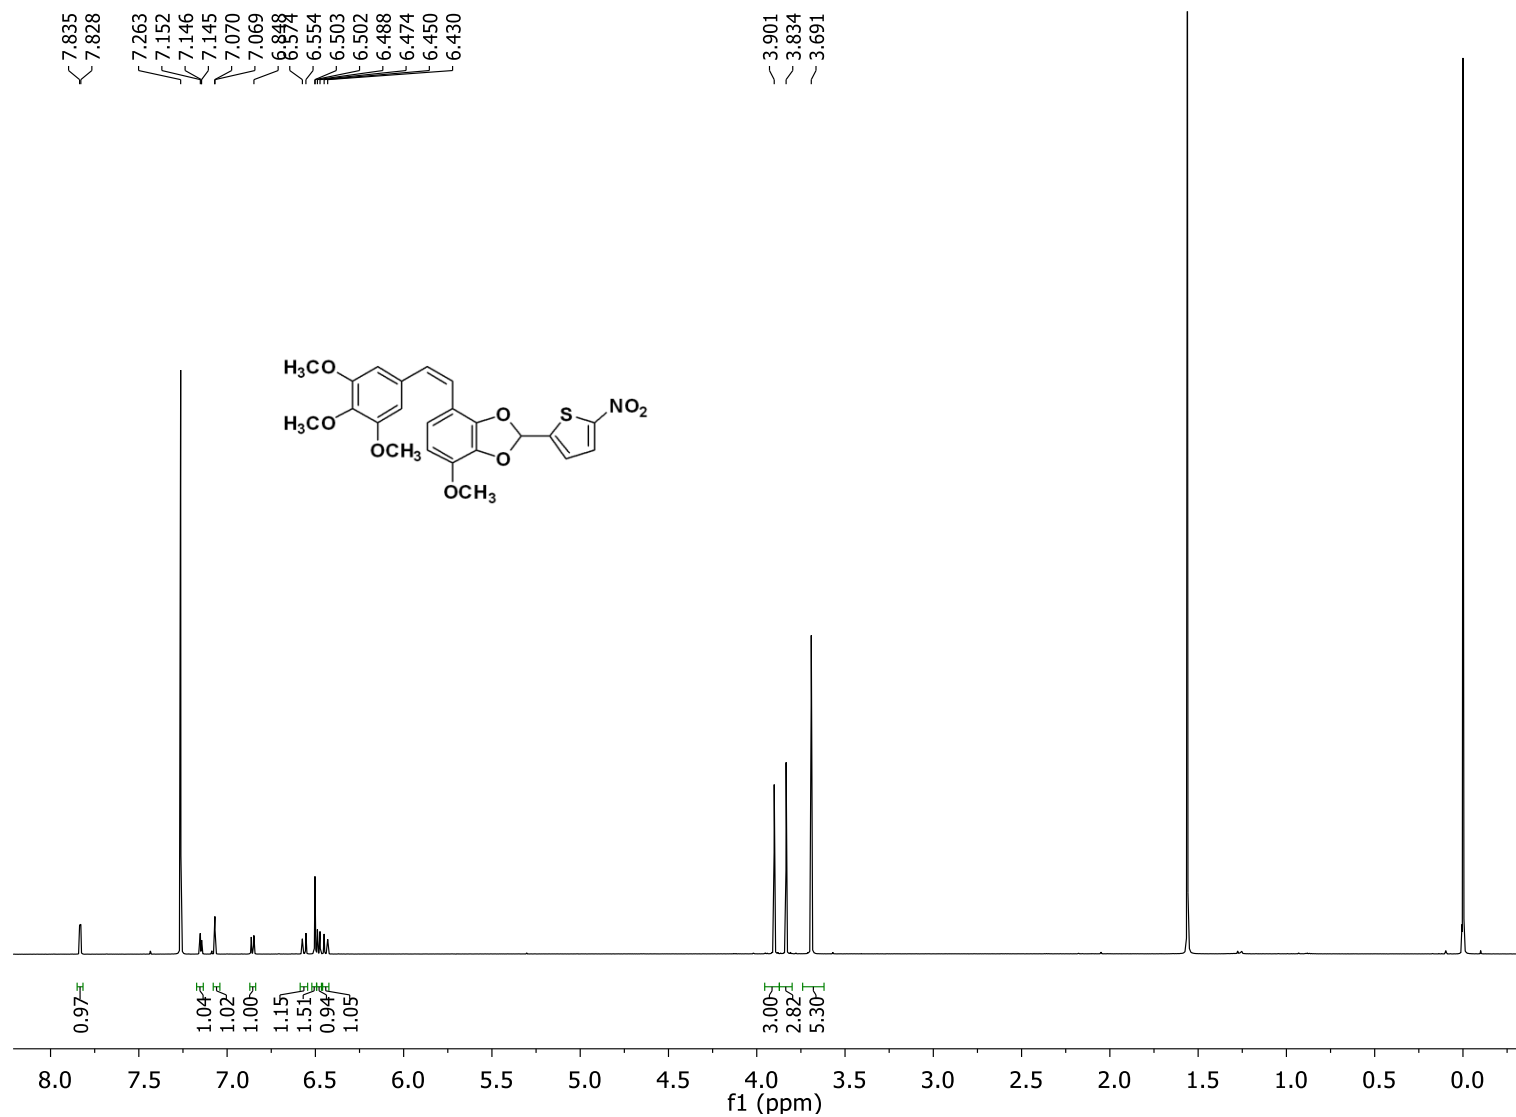

Note: The proton count drops at the non-aromatic nitrothiophene carbon for the nor-methyl cyclic structure **35**.

<sup>13</sup>C NMR (125 MHz, CDCl<sub>3</sub>) for Compound **35**

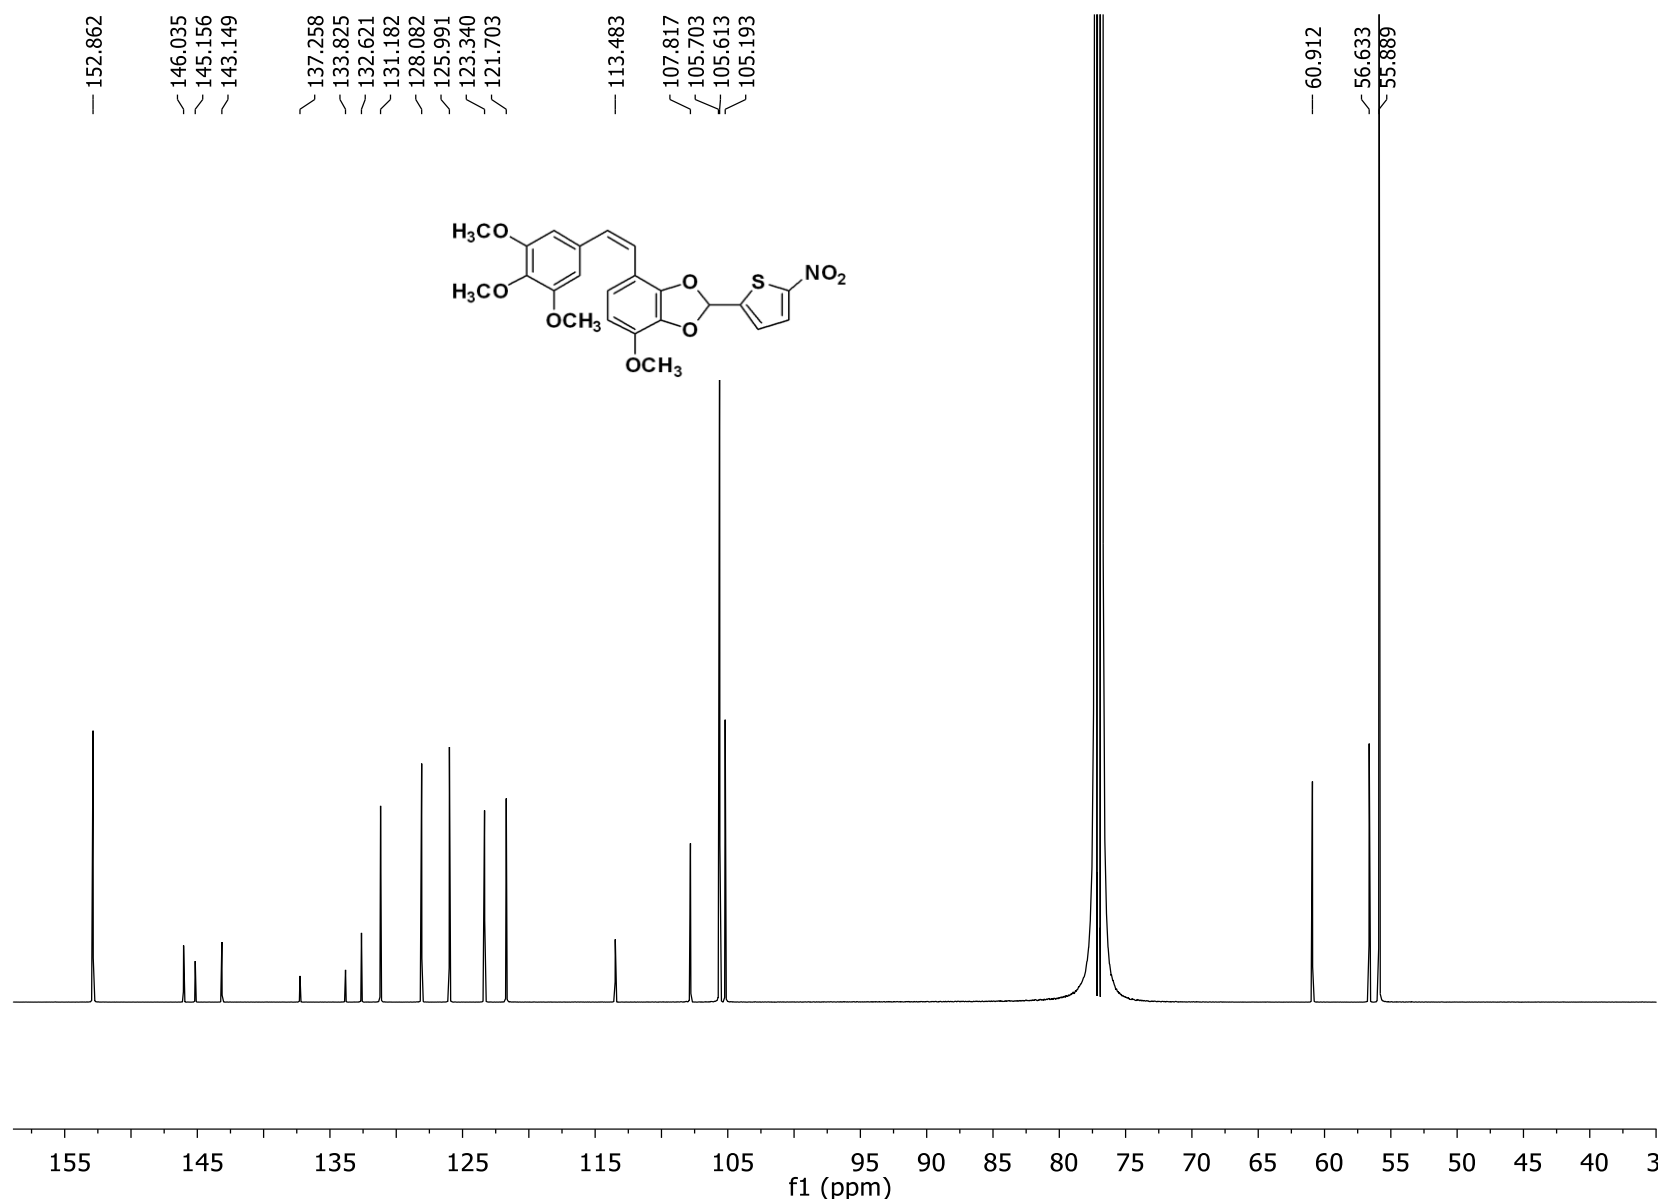

S105

<sup>13</sup>C DEPT NMR (125 MHz, CDCl<sub>3</sub>) for Compound **35**

131.203  
128.104  
126.013  
123.359  
121.724

107.835  
105.631  
105.214

60.933  
56.652  
55.909

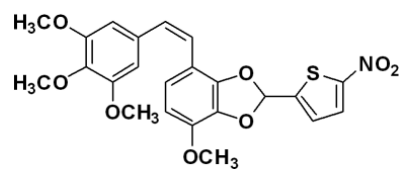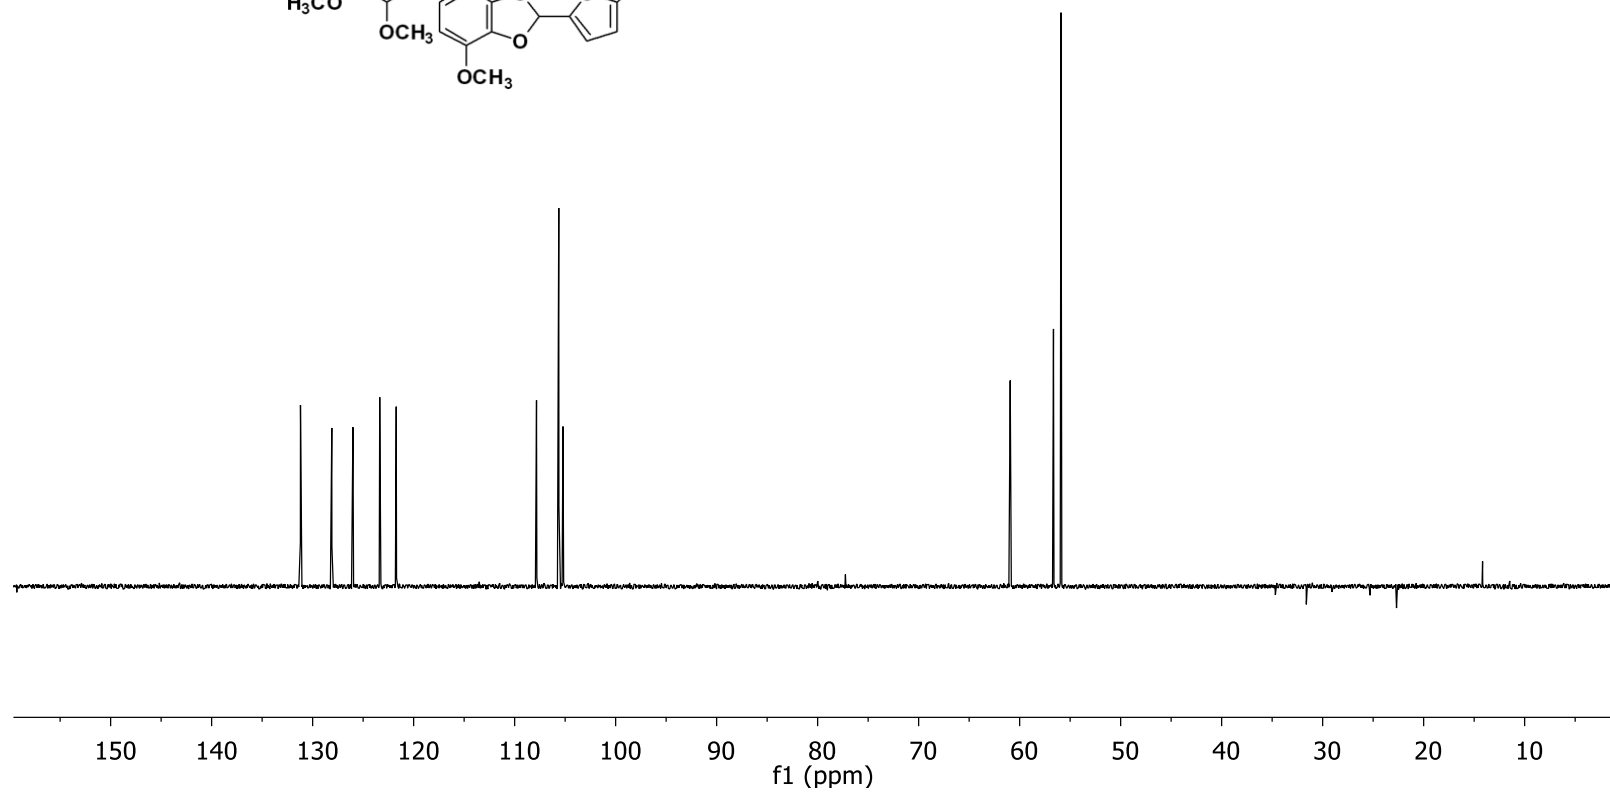

S106

## HPLC Traces for Compound 35

Data File C:\CHEM32\1\DATA\LAXMAN\LD-VI-125-RUN01.D

Sample Name: LD-VI-125-1A-run1

```
=====
Acq. Operator   : Laxman
Acq. Instrument : Instrument 1          Location : -
Injection Date  : 12/9/2014 11:32:27 AM
Acq. Method     : C:\CHEM32\1\METHODS\MASTERMETHOD.M
Last changed    : 12/9/2014 11:26:37 AM by Laxman
Analysis Method : C:\CHEM32\1\DATA\LAXMAN\LD-VI-125-RUN01.D\DA.M (MASTERMETHOD.M)
Last changed    : 12/9/2014 12:37:21 PM by ERICA P
Sample Info     : Method:Mastermethod
```

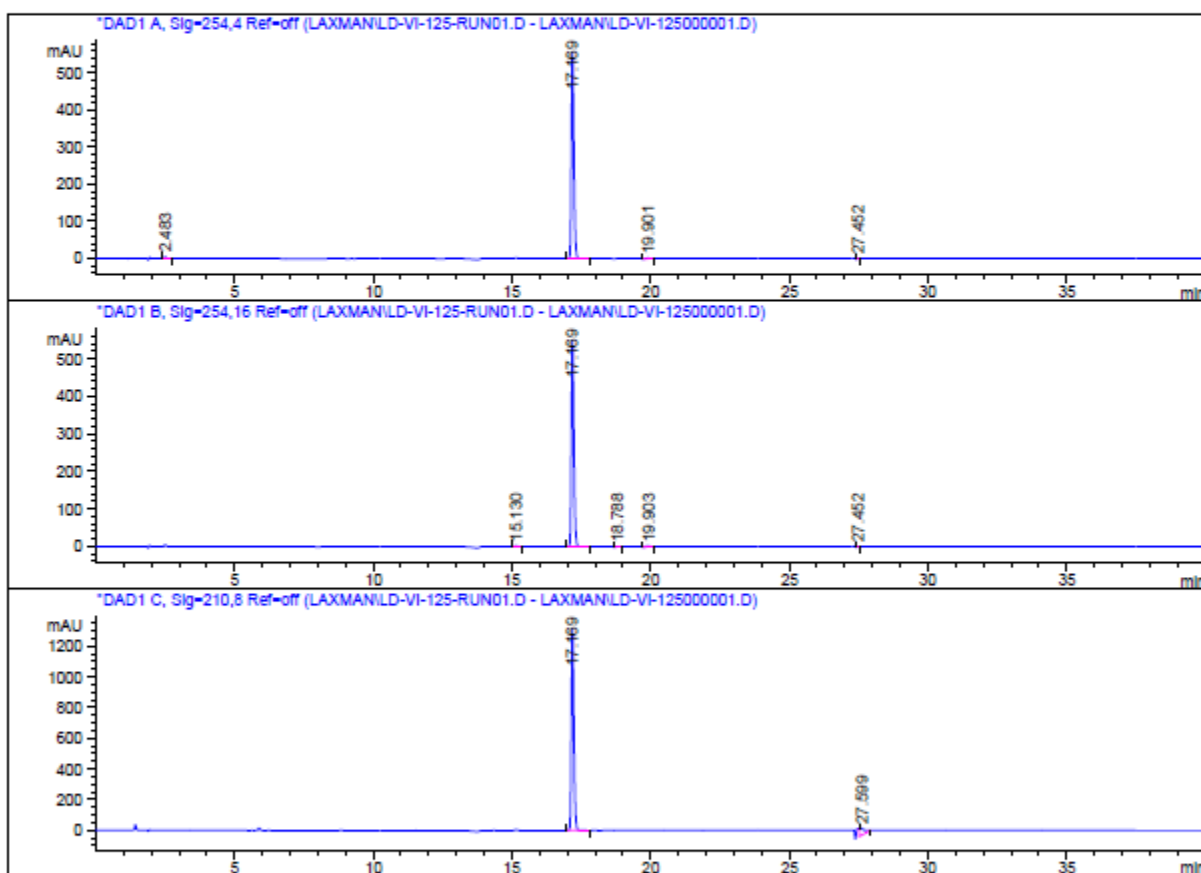

Data File C:\CHEM32\1\DATA\LAXMAN\LD-VI-125-RUN01.D  
Sample Name: LD-VI-125-1A-run1

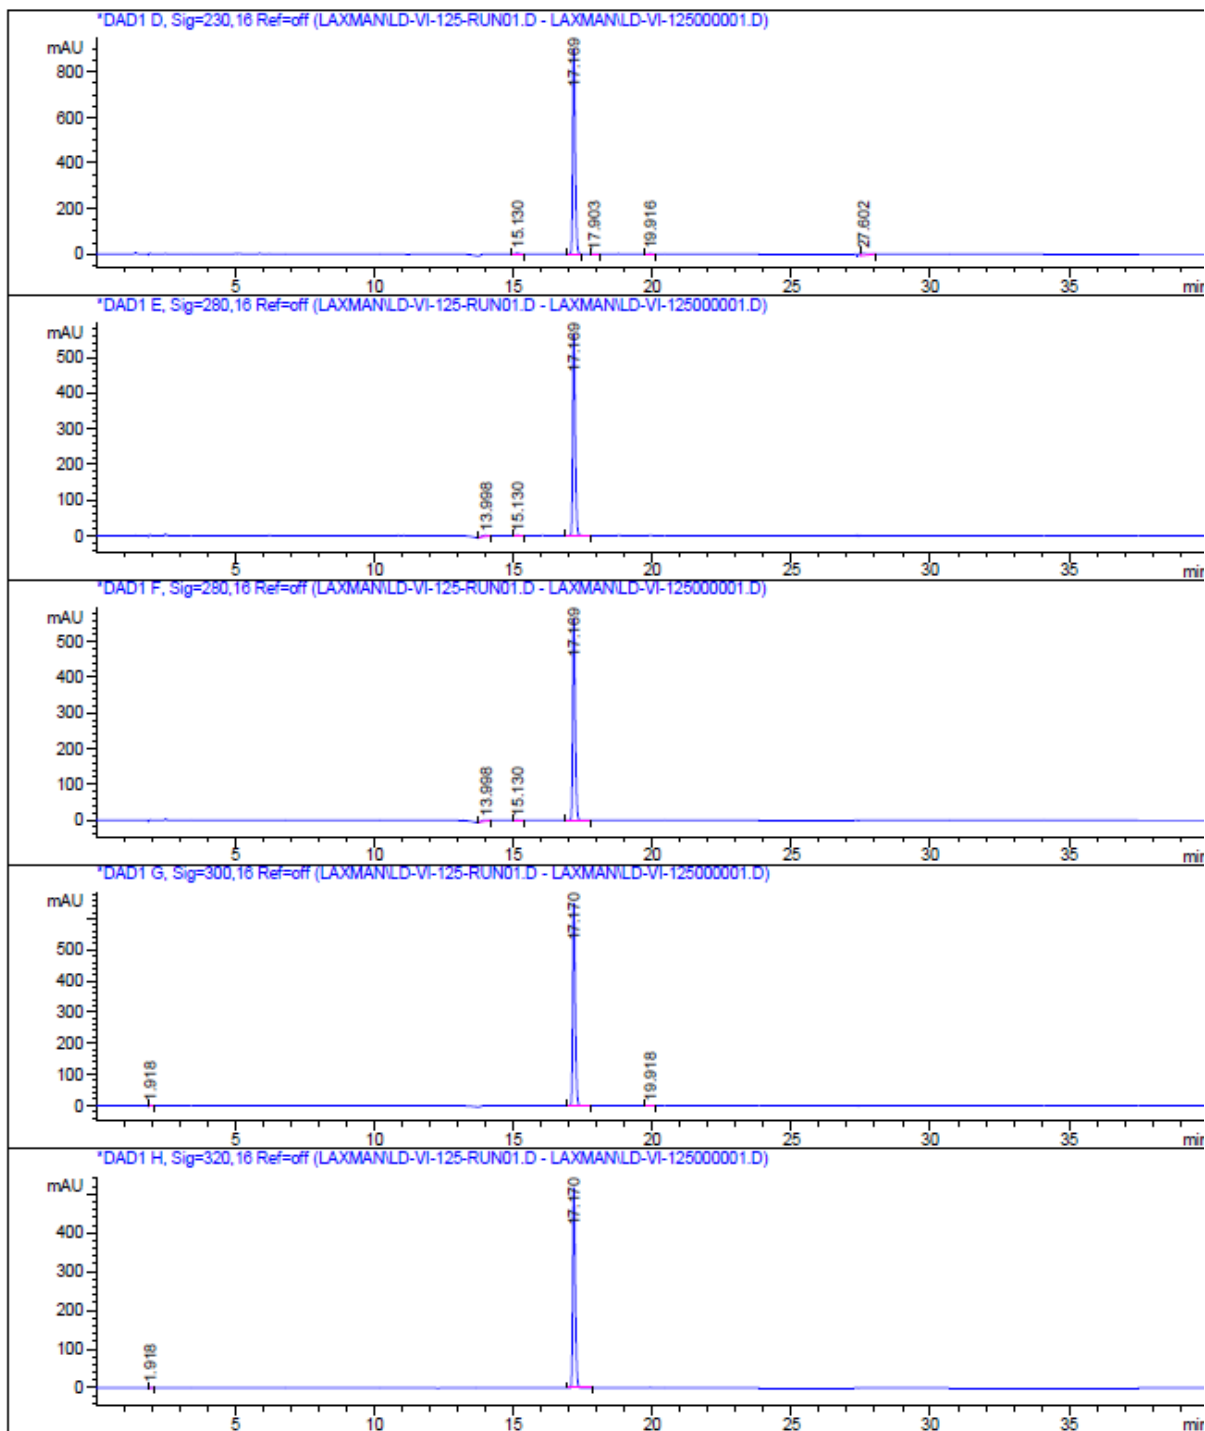

Data File C:\CHEM32\1\DATA\LAXMAN\LD-VI-125-RUN01.D  
Sample Name: LD-VI-125-1A-run1

=====  
Area Percent Report  
=====

Sorted By : Signal  
Multiplier : 1.0000  
Dilution : 1.0000  
Use Multiplier & Dilution Factor with ISTDs

Signal 1: DAD1 A, Sig=254,4 Ref=off  
Signal has been modified after loading from rawdata file!

| Peak #   | RetTime [min] | Type | Width [min] | Area [mAU*s] | Height [mAU] | Area %  |
|----------|---------------|------|-------------|--------------|--------------|---------|
| 1        | 2.483         | BB   | 0.0712      | 21.61808     | 4.74181      | 0.6184  |
| 2        | 17.169        | BB   | 0.0939      | 3441.88940   | 558.35913    | 98.4640 |
| 3        | 19.901        | BB   | 0.1673      | 24.80698     | 1.93890      | 0.7097  |
| 4        | 27.452        | BB   | 0.0756      | 7.26803      | 1.82501      | 0.2079  |
| Totals : |               |      |             | 3495.58249   | 566.56485    |         |

Signal 2: DAD1 B, Sig=254,16 Ref=off  
Signal has been modified after loading from rawdata file!

| Peak #   | RetTime [min] | Type | Width [min] | Area [mAU*s] | Height [mAU] | Area %  |
|----------|---------------|------|-------------|--------------|--------------|---------|
| 1        | 15.130        | BB   | 0.1068      | 15.60068     | 2.14649      | 0.4513  |
| 2        | 17.169        | BB   | 0.0939      | 3399.50537   | 551.31744    | 98.3460 |
| 3        | 18.788        | BB   | 0.1392      | 12.07905     | 1.36572      | 0.3494  |
| 4        | 19.903        | BB   | 0.1665      | 22.60753     | 1.80040      | 0.6540  |
| 5        | 27.452        | BB   | 0.0773      | 6.88721      | 1.45335      | 0.1992  |
| Totals : |               |      |             | 3456.67985   | 558.08340    |         |

Signal 3: DAD1 C, Sig=210,8 Ref=off  
Signal has been modified after loading from rawdata file!

| Peak #   | RetTime [min] | Type | Width [min] | Area [mAU*s] | Height [mAU] | Area %  |
|----------|---------------|------|-------------|--------------|--------------|---------|
| 1        | 17.169        | BB   | 0.0946      | 8231.09180   | 1323.41785   | 92.6451 |
| 2        | 27.599        | VB   | 0.1942      | 653.44891    | 46.99881     | 7.3549  |
| Totals : |               |      |             | 8884.54071   | 1370.41666   |         |

Data File C:\CHEM32\1\DATA\LAXMAN\LD-VI-125-RUN01.D  
Sample Name: LD-VI-125-1A-run1

Signal 4: DAD1 D, Sig=230,16 Ref=off  
Signal has been modified after loading from rawdata file!

| Peak # | RetTime [min] | Type | Width [min] | Area [mAU*s] | Height [mAU] | Area %  |
|--------|---------------|------|-------------|--------------|--------------|---------|
| 1      | 15.130        | BB   | 0.1026      | 29.53756     | 4.27385      | 0.5128  |
| 2      | 17.169        | BB   | 0.0936      | 5548.04736   | 903.54651    | 96.3151 |
| 3      | 17.903        | BB   | 0.1581      | 17.66217     | 1.58403      | 0.3066  |
| 4      | 19.916        | BB   | 0.1198      | 11.05690     | 1.31928      | 0.1919  |
| 5      | 27.602        | VB   | 0.2266      | 154.00311    | 9.04747      | 2.6735  |

Totals : 5760.30710 919.77115

Signal 5: DAD1 E, Sig=280,16 Ref=off  
Signal has been modified after loading from rawdata file!

| Peak # | RetTime [min] | Type | Width [min] | Area [mAU*s] | Height [mAU] | Area %  |
|--------|---------------|------|-------------|--------------|--------------|---------|
| 1      | 13.998        | BB   | 0.2883      | 63.81478     | 3.37971      | 1.7886  |
| 2      | 15.130        | BB   | 0.1106      | 10.40754     | 1.40286      | 0.2917  |
| 3      | 17.169        | BB   | 0.0939      | 3493.63037   | 567.18445    | 97.9197 |

Totals : 3567.85270 571.96701

Signal 6: DAD1 F, Sig=280,16 Ref=off  
Signal has been modified after loading from rawdata file!

| Peak # | RetTime [min] | Type | Width [min] | Area [mAU*s] | Height [mAU] | Area %  |
|--------|---------------|------|-------------|--------------|--------------|---------|
| 1      | 13.998        | BB   | 0.2883      | 63.81478     | 3.37971      | 1.7886  |
| 2      | 15.130        | BB   | 0.1106      | 10.40754     | 1.40286      | 0.2917  |
| 3      | 17.169        | BB   | 0.0939      | 3493.63037   | 567.18445    | 97.9197 |

Totals : 3567.85270 571.96701

Signal 7: DAD1 G, Sig=300,16 Ref=off  
Signal has been modified after loading from rawdata file!

| Peak # | RetTime [min] | Type | Width [min] | Area [mAU*s] | Height [mAU] | Area %  |
|--------|---------------|------|-------------|--------------|--------------|---------|
| 1      | 1.918         | BB   | 0.0755      | 18.05997     | 3.31663      | 0.4456  |
| 2      | 17.170        | BB   | 0.0942      | 4028.34277   | 651.30194    | 99.3971 |

Data File C:\CHEM32\1\DATA\LAXMAN\LD-VI-125-RUN01.D  
Sample Name: LD-VI-125-1A-run1

| Peak # | RetTime [min] | Type | Width [min] | Area [mAU*s] | Height [mAU] | Area % |
|--------|---------------|------|-------------|--------------|--------------|--------|
| 3      | 19.918        | BB   | 0.0962      | 6.37247      | 1.00239      | 0.1572 |

Totals : 4052.77521 655.62096

Signal 8: DAD1 H, Sig=320,16 Ref=off  
Signal has been modified after loading from rawdata file!

| Peak # | RetTime [min] | Type | Width [min] | Area [mAU*s] | Height [mAU] | Area %  |
|--------|---------------|------|-------------|--------------|--------------|---------|
| 1      | 1.918         | BB   | 0.0723      | 15.04224     | 2.90981      | 0.4641  |
| 2      | 17.170        | BB   | 0.0947      | 3226.43042   | 517.99158    | 99.5359 |

Totals : 3241.47266 520.90138

=====  
\*\*\* End of Report \*\*\*

# Mass Spectrum for Compound 35

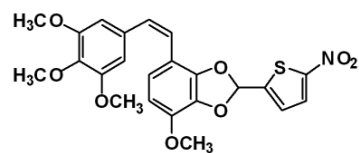

Chemical Formula:  $C_{23}H_{21}NO_8S$

Exact Mass: 471.0988

Molecular Weight: 471.4800

NC:  
2.44E7  
ID#M-125-1A\_Obi +  
ESI#13 RE:0.11 AV: 1  
T.FIMS+c ESI Fullms  
[100.00-900.00]

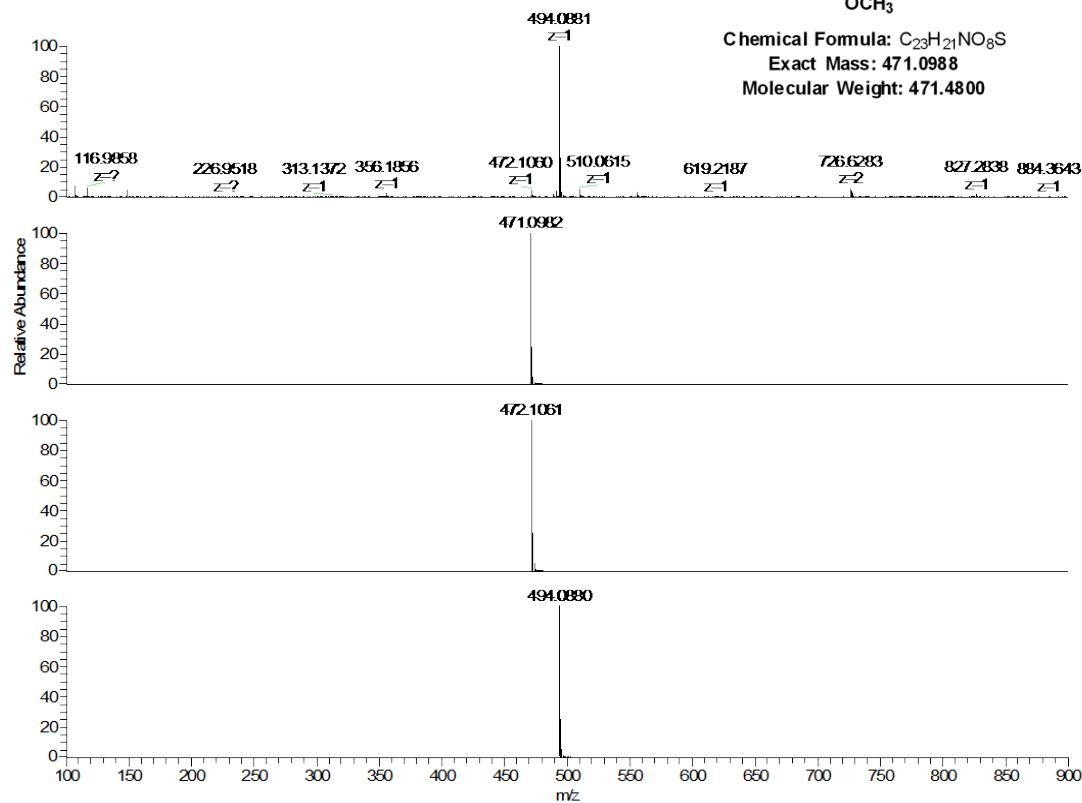

<sup>1</sup>H NMR (500 MHz, CDCl<sub>3</sub>) of Compound **36**

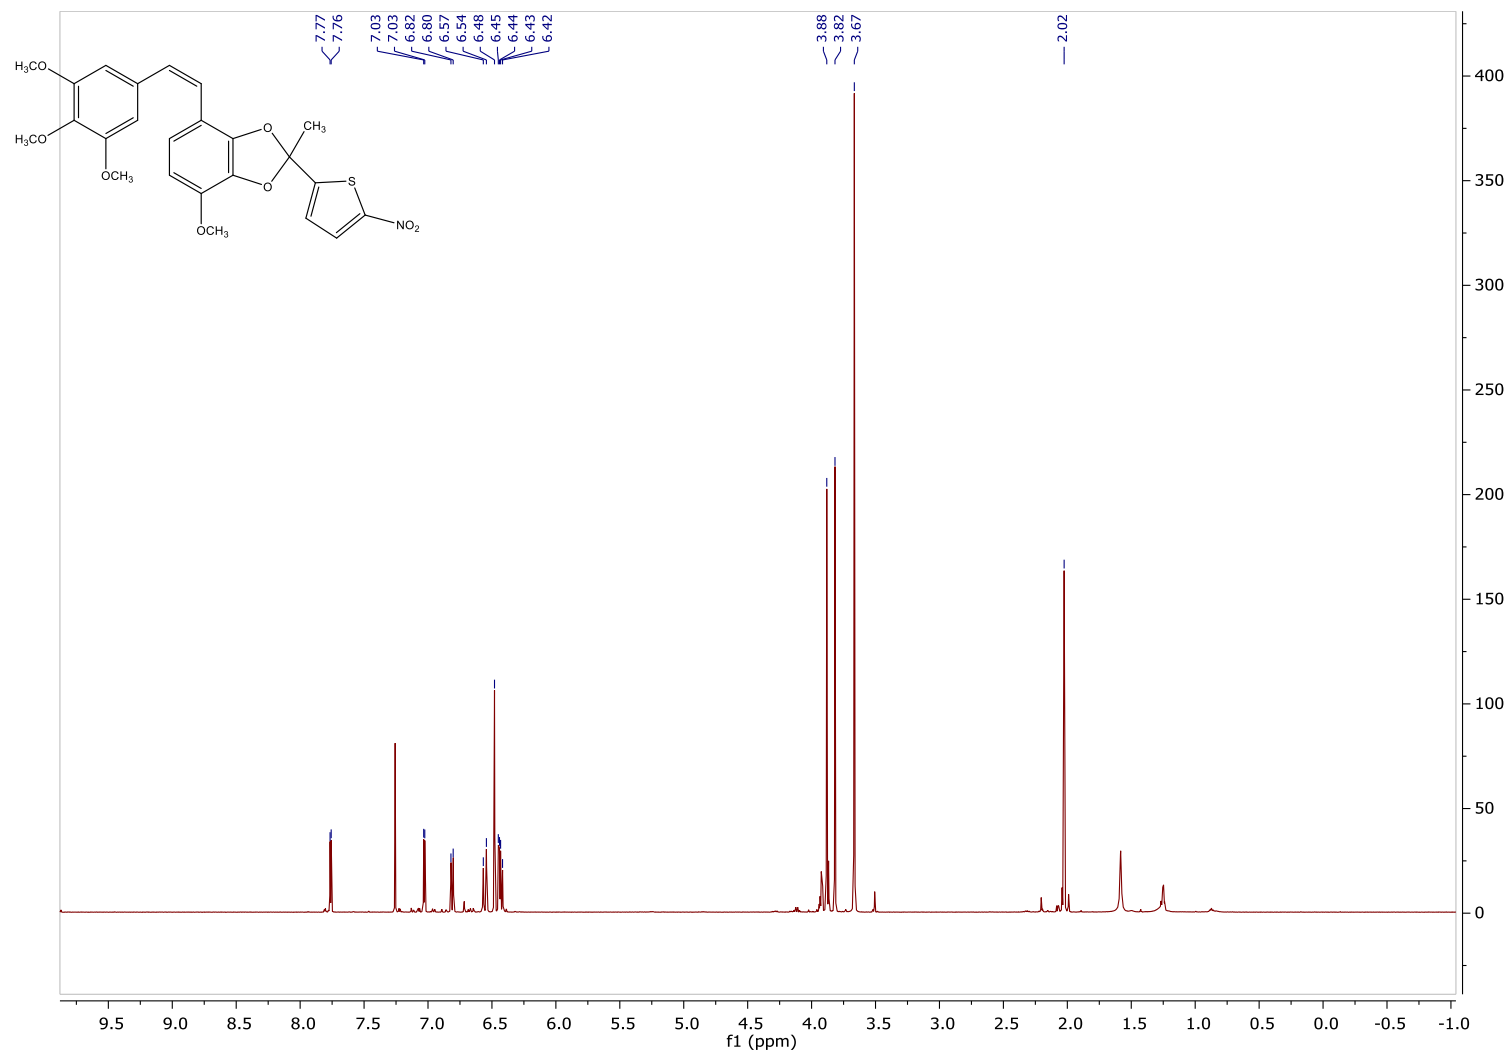

Note: The proton signal at the non-aromatic nitrothiophene carbon disappears for the *mono*-methyl cyclic structure **36**.

<sup>13</sup>C NMR (500 MHz, CDCl<sub>3</sub>) of Compound **36**

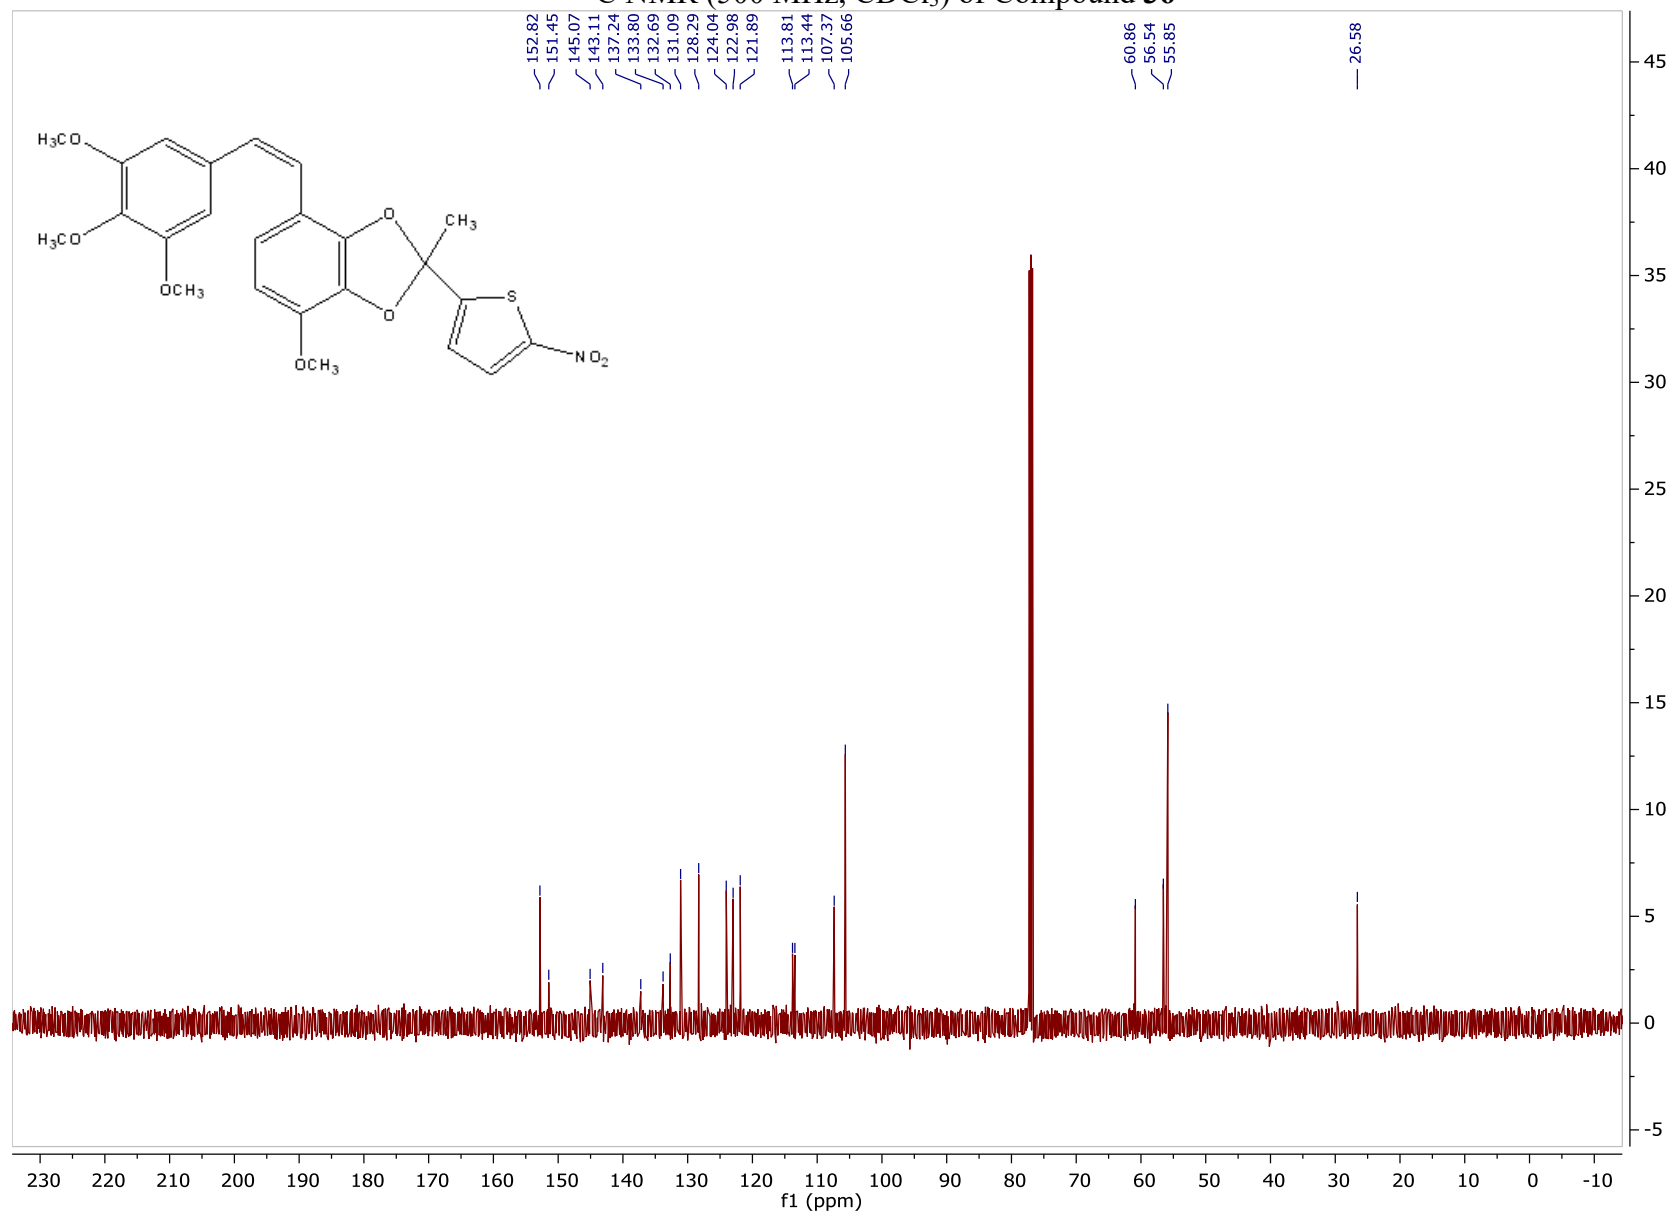

# HPLC Trace of Compound 36

Data File C:\Chem32\1\Data\Blake\RUN1000008.D

Sample Name: DiboundMonoCA1 Run1

=====

Acq. Operator : Blake  
Acq. Instrument : Instrument 1 Location : -  
Injection Date : 3/5/2015 10:53:54 PM  
Acq. Method : C:\CHEM32\1\METHODS\GRAD 2 50-90 ACN.M  
Last changed : 3/5/2015 10:44:03 PM by Blake  
Analysis Method : C:\CHEM32\1\METHODS\RT-ACNWASH 2.M  
Last changed : 7/9/2015 2:27:22 PM by Blake  
Method Info : General Column Wash Method

Sample Info : Dibound Mono Trigger CA1 Run 1

Additional Info : Peak(s) manually integrated

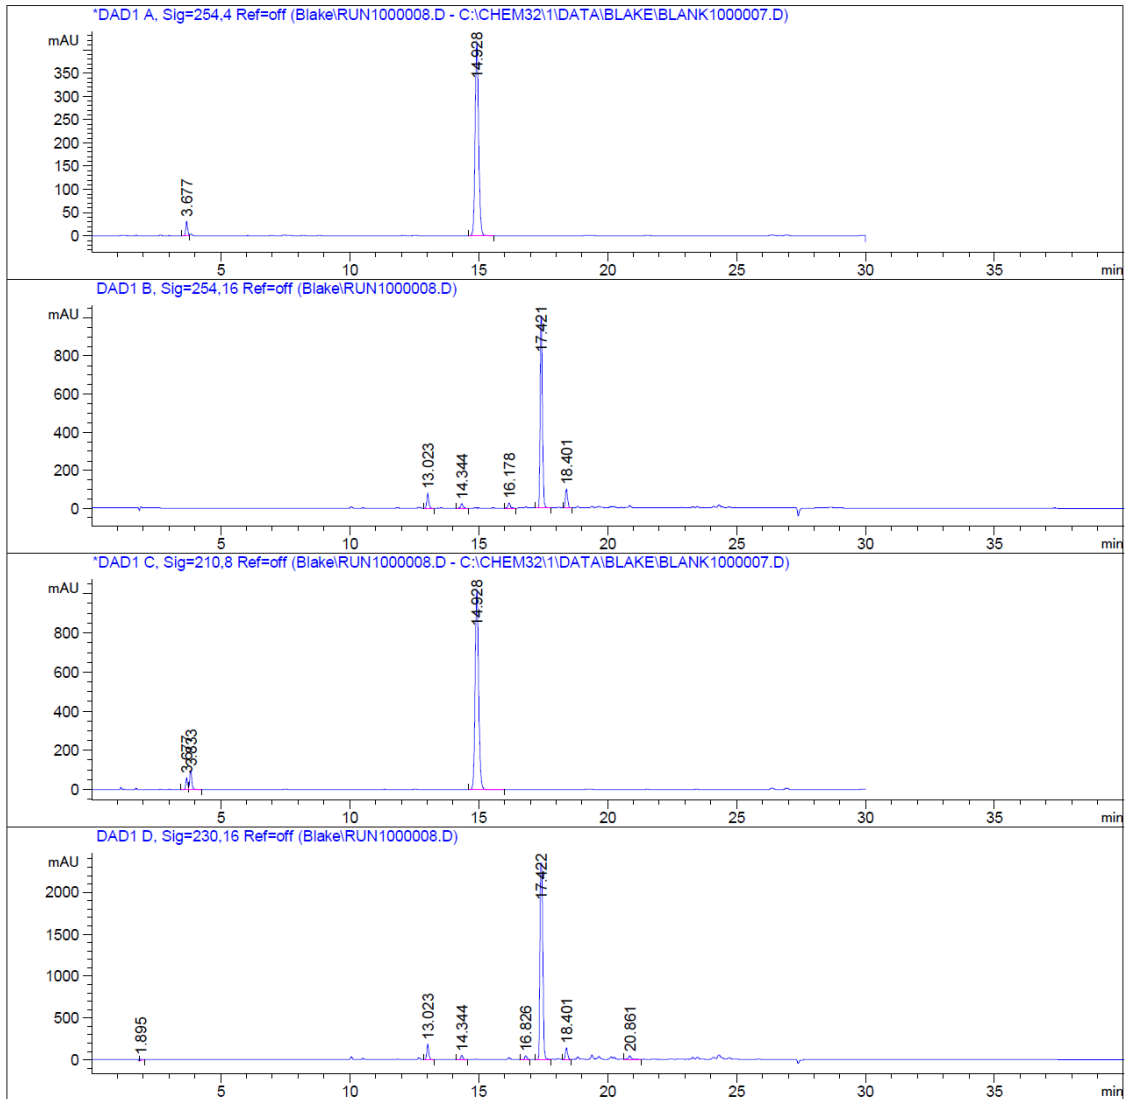

Data File C:\Chem32\1\Data\Blake\RUN1000008.D  
Sample Name: DiboundMonoCA1 Run1

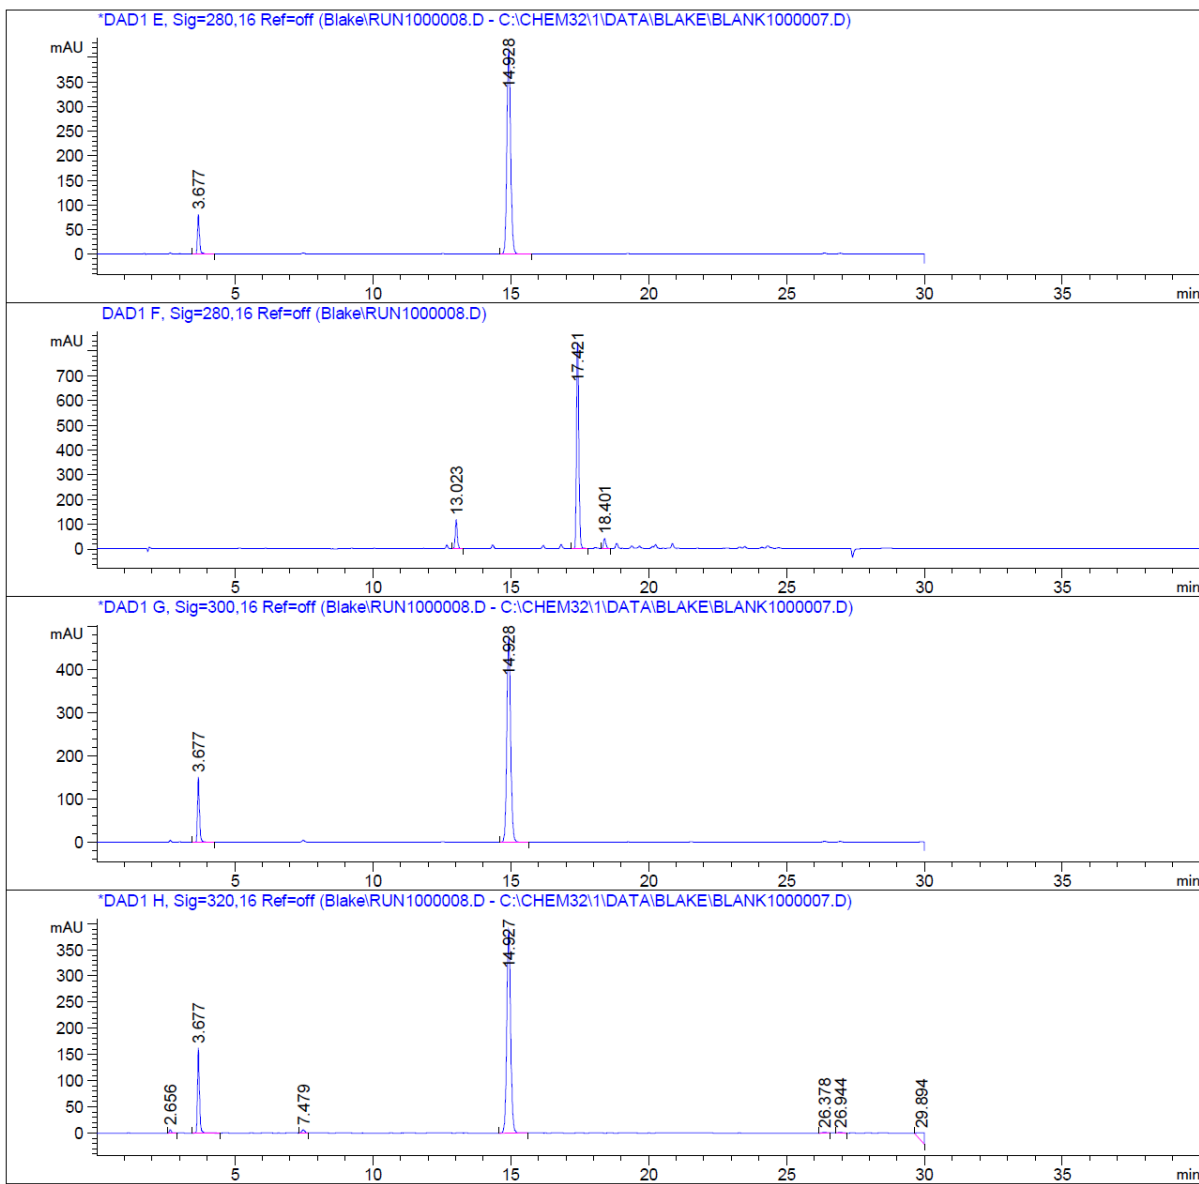

=====  
Area Percent Report  
=====

Sorted By : Signal  
Multiplier : 1.0000  
Dilution : 1.0000  
Use Multiplier & Dilution Factor with ISTDs

Data File C:\Chem32\1\Data\Blake\RUN1000008.D  
Sample Name: DiboundMonoCA1 Run1

Signal 1: DAD1 A, Sig=254,4 Ref=off

Signal has been modified after loading from rawdata file!

| Peak # | RetTime [min] | Type | Width [min] | Area [mAU*s] | Height [mAU] | Area %  |
|--------|---------------|------|-------------|--------------|--------------|---------|
| 1      | 3.677         | BV   | 0.0751      | 154.96552    | 31.65848     | 3.7729  |
| 2      | 14.928        | BB   | 0.1464      | 3952.39966   | 417.61395    | 96.2271 |

Totals : 4107.36517 449.27243

Signal 2: DAD1 B, Sig=254,16 Ref=off

| Peak # | RetTime [min] | Type | Width [min] | Area [mAU*s] | Height [mAU] | Area %  |
|--------|---------------|------|-------------|--------------|--------------|---------|
| 1      | 13.023        | BB   | 0.0792      | 412.37903    | 78.59989     | 5.5884  |
| 2      | 14.344        | BB   | 0.0864      | 140.51746    | 24.69783     | 1.9042  |
| 3      | 16.178        | BB   | 0.0870      | 150.26970    | 26.17360     | 2.0364  |
| 4      | 17.421        | BV   | 0.0921      | 6080.55078   | 1011.67804   | 82.4012 |
| 5      | 18.401        | VB   | 0.0914      | 595.48279    | 100.03498    | 8.0697  |

Totals : 7379.19975 1241.18435

Signal 3: DAD1 C, Sig=210,8 Ref=off

Signal has been modified after loading from rawdata file!

| Peak # | RetTime [min] | Type | Width [min] | Area [mAU*s] | Height [mAU] | Area %  |
|--------|---------------|------|-------------|--------------|--------------|---------|
| 1      | 3.677         | BV   | 0.0737      | 292.19226    | 61.24960     | 2.7847  |
| 2      | 3.833         | VB   | 0.0865      | 548.90851    | 96.23808     | 5.2313  |
| 3      | 14.928        | BB   | 0.1461      | 9651.77344   | 1023.13129   | 91.9841 |

Totals : 1.04929e4 1180.61897

Signal 4: DAD1 D, Sig=230,16 Ref=off

| Peak # | RetTime [min] | Type | Width [min] | Area [mAU*s] | Height [mAU] | Area %  |
|--------|---------------|------|-------------|--------------|--------------|---------|
| 1      | 1.895         | BB   | 0.0813      | 104.26080    | 18.61610     | 0.5003  |
| 2      | 13.023        | BB   | 0.0792      | 970.77802    | 184.92006    | 4.6584  |
| 3      | 14.344        | BB   | 0.0886      | 307.83749    | 52.38946     | 1.4772  |
| 4      | 16.826        | VV   | 0.0895      | 281.78674    | 47.30568     | 1.3522  |
| 5      | 17.422        | BV   | 0.1256      | 1.80297e4    | 2346.77515   | 86.5168 |
| 6      | 18.401        | VB   | 0.0910      | 824.25653    | 139.37587    | 3.9553  |
| 7      | 20.861        | VV   | 0.1067      | 320.90729    | 43.16537     | 1.5399  |

Totals : 2.08395e4 2832.54768

Data File C:\Chem32\1\Data\Blake\RUN1000008.D  
Sample Name: DiboundMonoCA1 Run1

Signal 5: DAD1 E, Sig=280,16 Ref=off

Signal has been modified after loading from rawdata file!

| Peak # | RetTime [min] | Type | Width [min] | Area [mAU*s] | Height [mAU] | Area %  |
|--------|---------------|------|-------------|--------------|--------------|---------|
| 1      | 3.677         | BB   | 0.0774      | 414.77179    | 81.48527     | 9.4891  |
| 2      | 14.928        | BB   | 0.1464      | 3956.28125   | 417.95911    | 90.5109 |

Totals : 4371.05304 499.44437

Signal 6: DAD1 F, Sig=280,16 Ref=off

| Peak # | RetTime [min] | Type | Width [min] | Area [mAU*s] | Height [mAU] | Area %  |
|--------|---------------|------|-------------|--------------|--------------|---------|
| 1      | 13.023        | BB   | 0.0793      | 614.59393    | 117.06161    | 10.6630 |
| 2      | 17.421        | BV   | 0.0908      | 4903.08594   | 831.98090    | 85.0673 |
| 3      | 18.401        | VV   | 0.0920      | 246.09302    | 41.01019     | 4.2697  |

Totals : 5763.77289 990.05270

Signal 7: DAD1 G, Sig=300,16 Ref=off

Signal has been modified after loading from rawdata file!

| Peak # | RetTime [min] | Type | Width [min] | Area [mAU*s] | Height [mAU] | Area %  |
|--------|---------------|------|-------------|--------------|--------------|---------|
| 1      | 3.677         | BB   | 0.0764      | 758.47052    | 151.60106    | 14.2607 |
| 2      | 14.928        | BB   | 0.1475      | 4560.13281   | 476.96796    | 85.7393 |

Totals : 5318.60333 628.56902

Signal 8: DAD1 H, Sig=320,16 Ref=off

Signal has been modified after loading from rawdata file!

| Peak # | RetTime [min] | Type | Width [min] | Area [mAU*s] | Height [mAU] | Area %  |
|--------|---------------|------|-------------|--------------|--------------|---------|
| 1      | 2.656         | BB   | 0.0669      | 29.37908     | 6.73783      | 0.5950  |
| 2      | 3.677         | BB   | 0.0764      | 815.72125    | 162.95384    | 16.5208 |
| 3      | 7.479         | BB   | 0.1111      | 41.89455     | 5.88280      | 0.8485  |
| 4      | 14.927        | BB   | 0.1491      | 3772.36133   | 389.08377    | 76.4016 |
| 5      | 26.378        | BB   | 0.1392      | 15.31042     | 1.69743      | 0.3101  |
| 6      | 26.944        | BB   | 0.1383      | 14.27374     | 1.59684      | 0.2891  |
| 7      | 29.894        | BBA  | 0.2220      | 248.60039    | 16.66612     | 5.0349  |

Totals : 4937.54077 584.61863

Data File C:\Chem32\1\Data\Blake\RUN1000008.D  
Sample Name: DiboundMonoCA1 Run1

=====  
\*\*\* End of Report \*\*\*

# Mass Spectrum of Compound 36

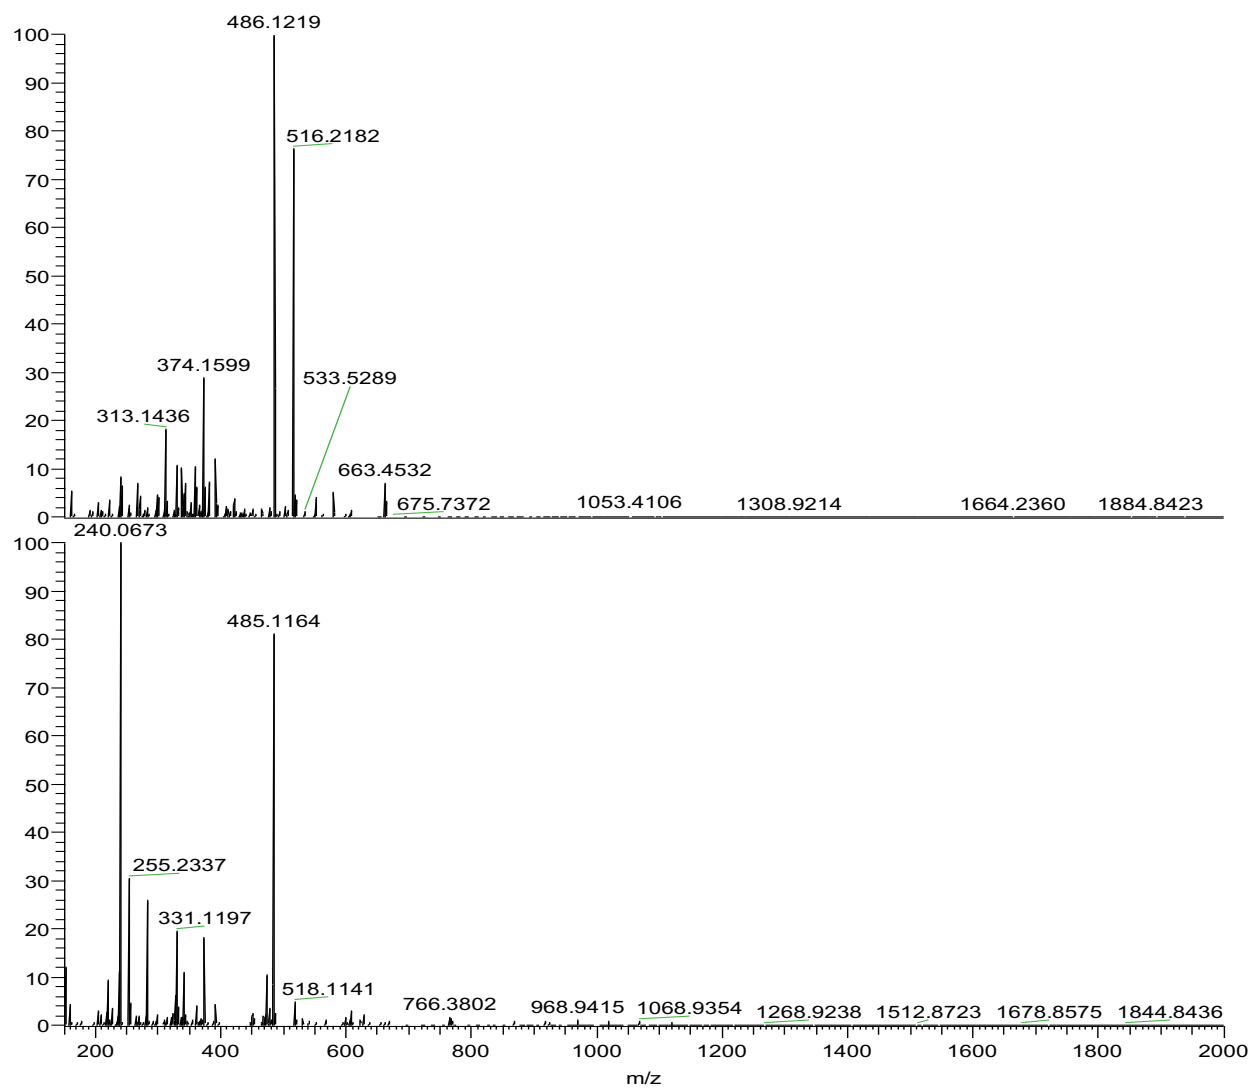

NL: 2.33E6  
Mono Cyclic APP#1  
RT: 0.00 AV: 1 T:  
FTMS + p APCI corona  
pi Full ms  
[150.00-2000.00]

NL: 9.14E5  
mono cyclic appi neg#1  
RT: 0.01 AV: 1 T:  
FTMS - p APCI corona  
pi Full ms  
[150.00-2000.00]

<sup>1</sup>H NMR (600 MHz, Acetone) for Compound **37**

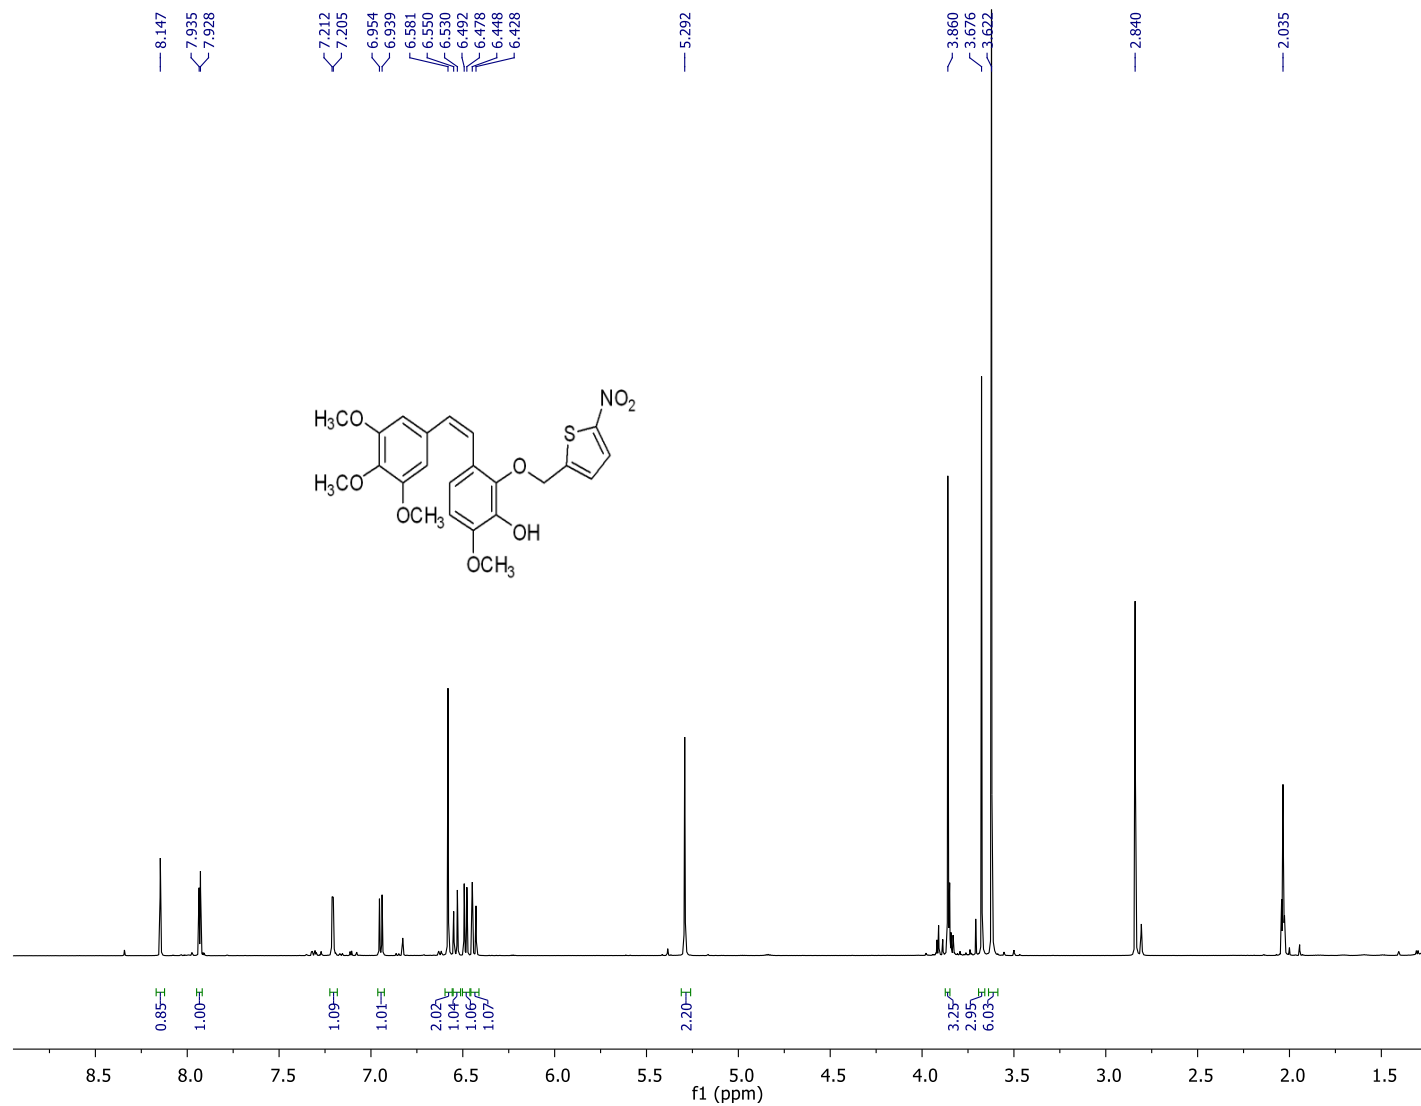

<sup>13</sup>C NMR (151 MHz, Acetone) for Compound **37**

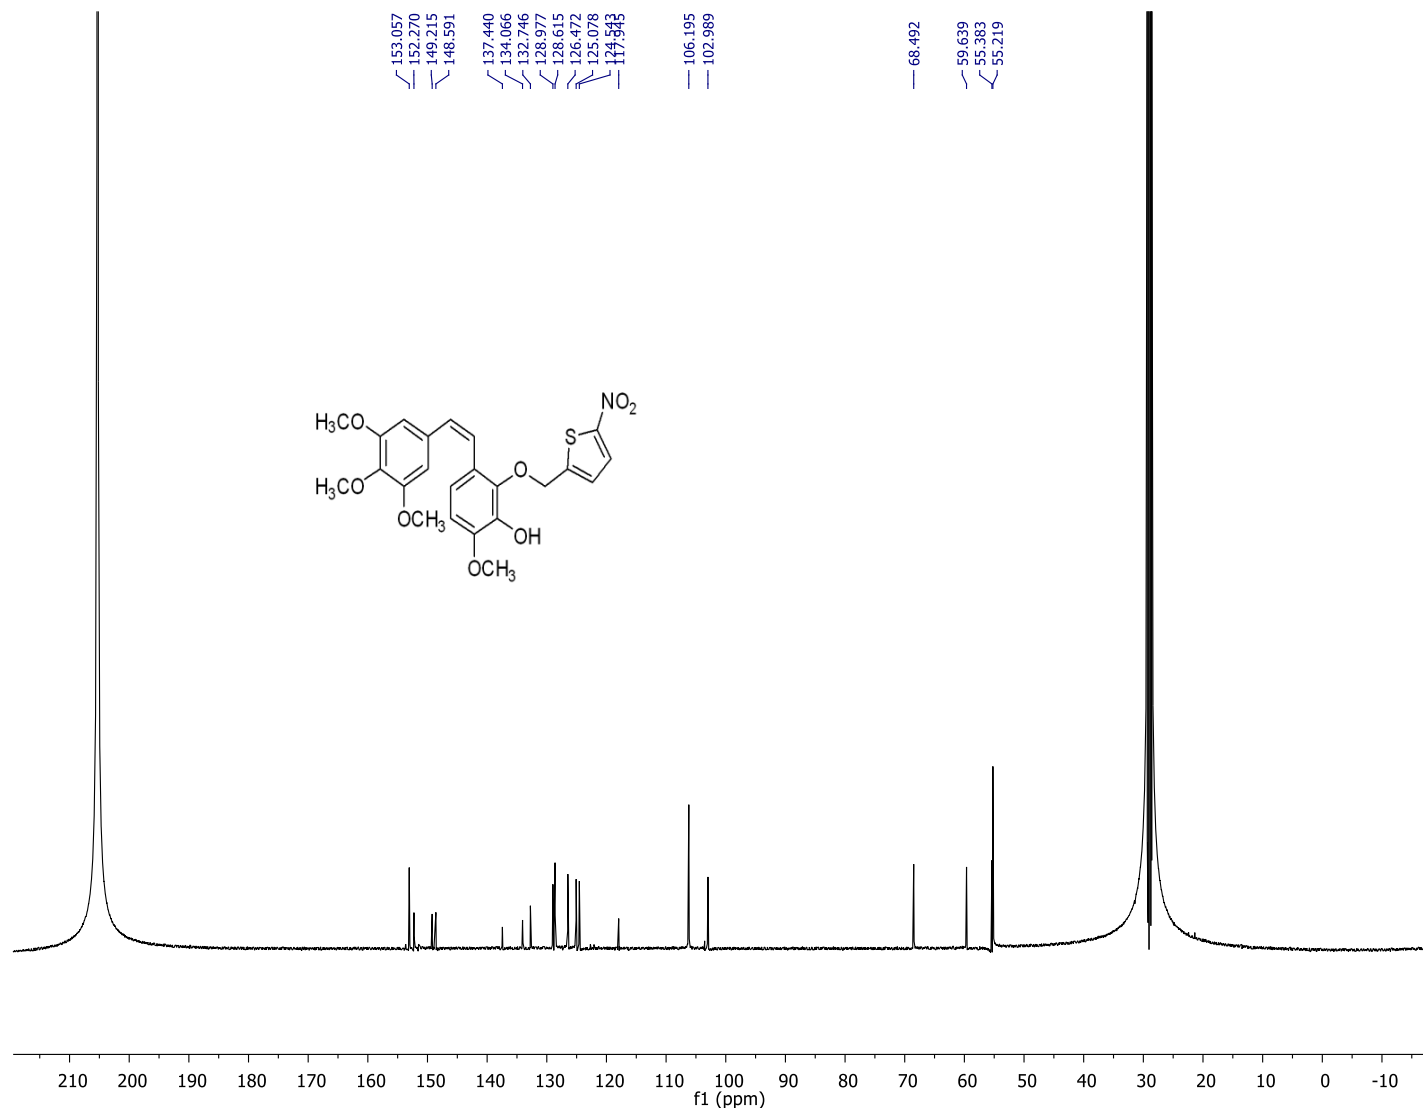

<sup>13</sup>C DEPT NMR (125 MHz, Acetone) for Compound **37**

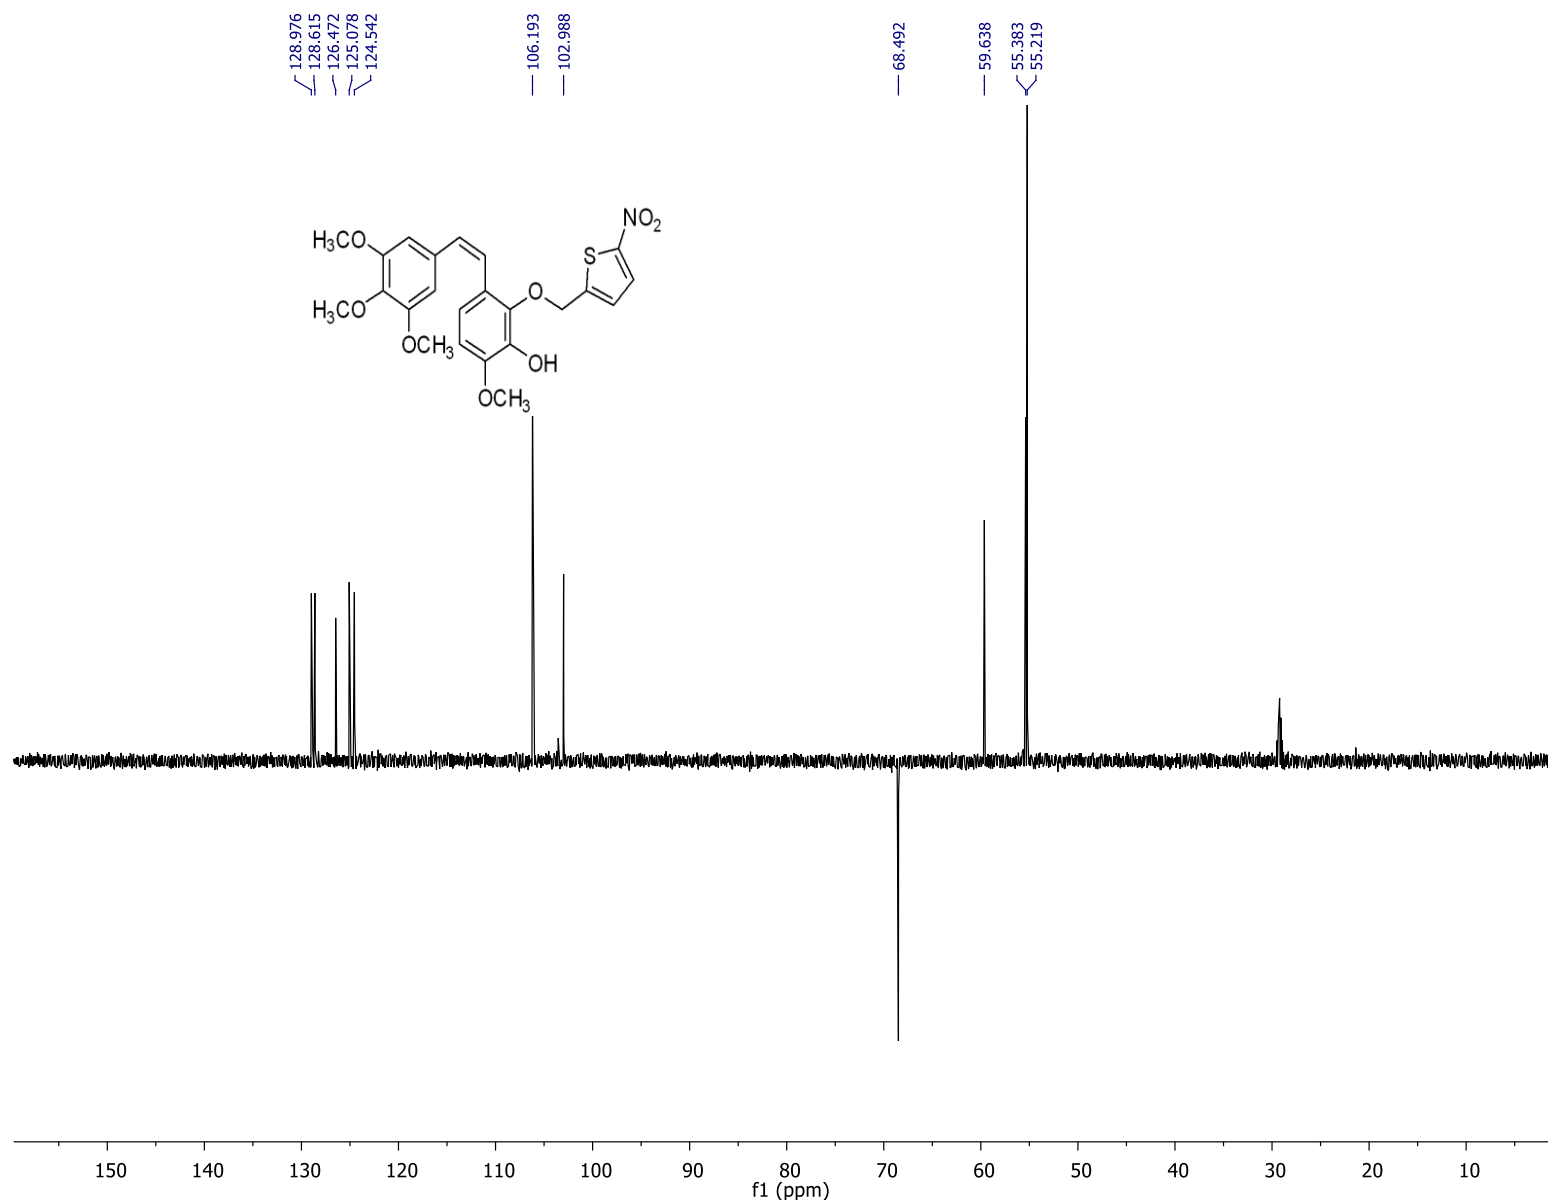

S123

## HPLC Traces for Compound 37

Data File C:\CHEM32\1\DATA\LAXMAN\LDVII55-1-RUN01.D

Sample Name: LD-VII-55-1A-run1

```
=====
Acq. Operator   : Laxman
Acq. Instrument : Instrument 1          Location :   -
Injection Date  : 4/9/2015 11:04:03 AM
Acq. Method     : C:\CHEM32\1\METHODS\GRAD 2 50-90 ACN.M
Last changed    : 4/9/2015 10:42:01 AM by Laxman
Analysis Method : C:\CHEM32\1\DATA\LAXMAN\LDVII55-1-RUN01.D\DA.M (GRAD 2 50-90 ACN.M)
Last changed    : 4/9/2015 11:51:08 AM by Graham
Sample Info     : Method- GRAD 2 50-90% ACN
```

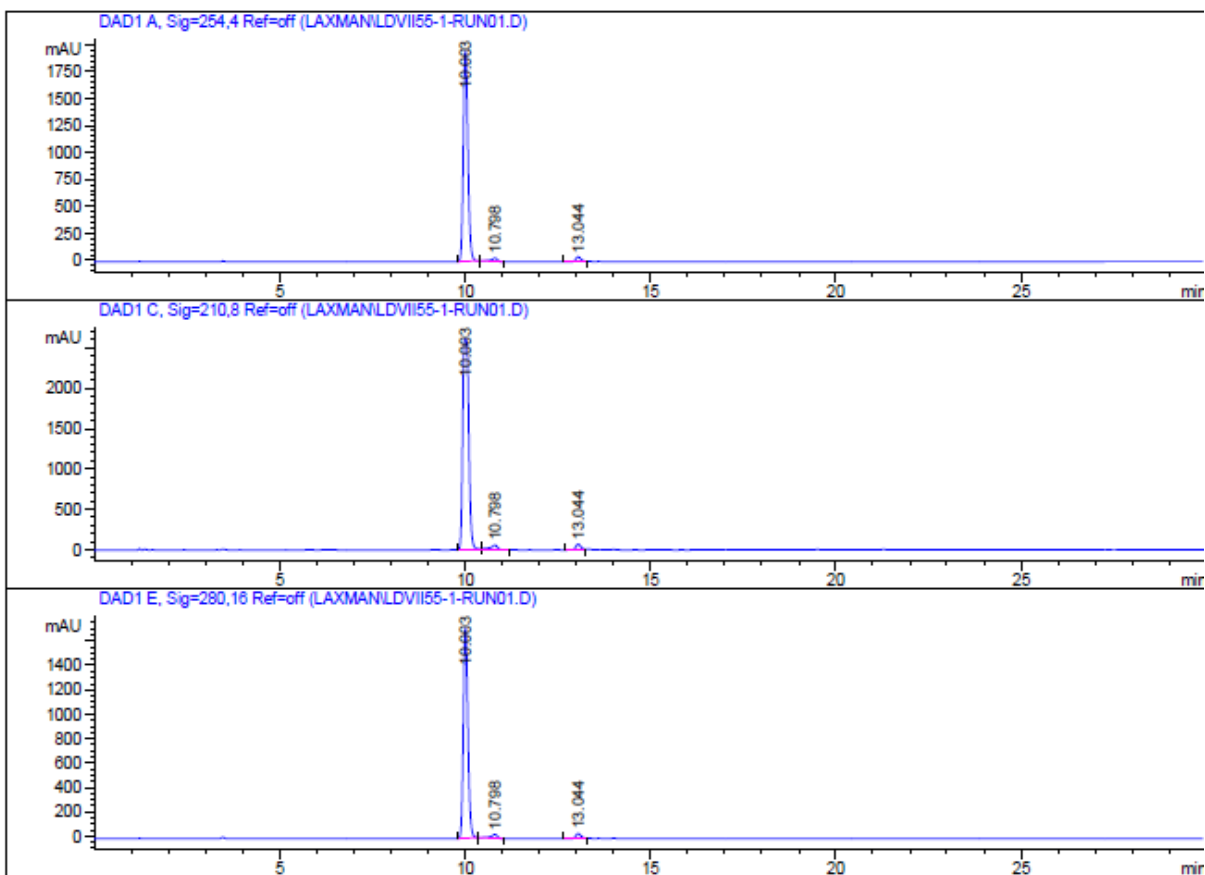

Data File C:\CHEM32\1\DATA\LAXMAN\LDVII55-1-RUN01.D  
Sample Name: LD-VII-55-1A-run1

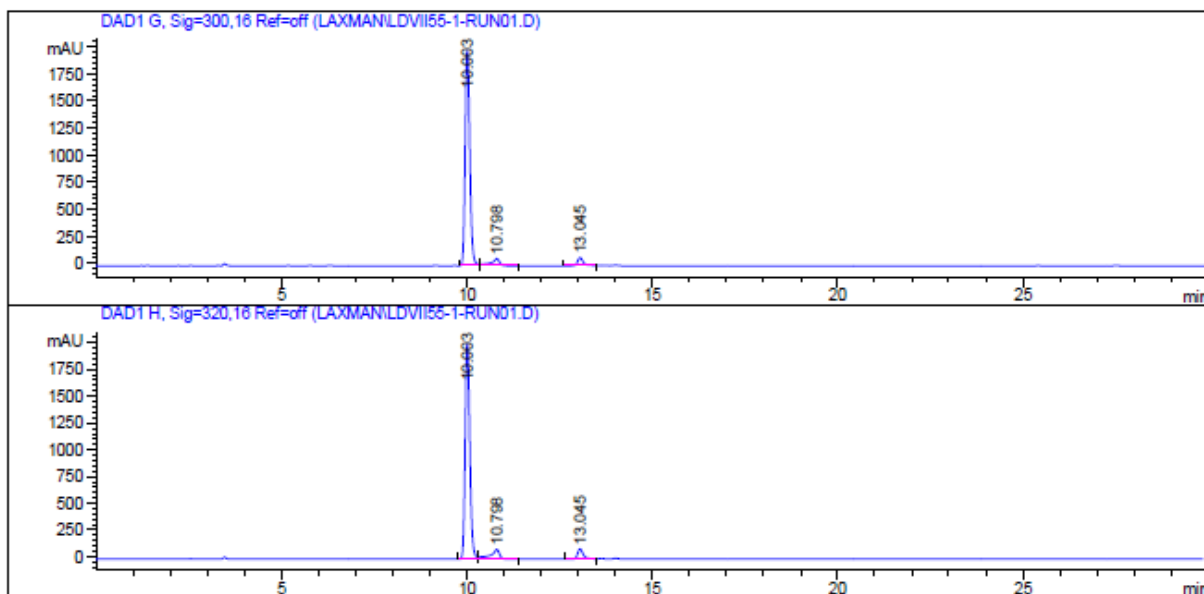

=====  
Area Percent Report  
=====

Sorted By : Signal  
Multiplier : 1.0000  
Dilution : 1.0000  
Use Multiplier & Dilution Factor with ISTDs

Signal 1: DAD1 A, Sig=254,4 Ref=off

| Peak # | RetTime [min] | Type | Width [min] | Area [mAU*s] | Height [mAU] | Area %  |
|--------|---------------|------|-------------|--------------|--------------|---------|
| 1      | 10.003        | BB   | 0.1338      | 1.67595e4    | 1959.17419   | 95.2846 |
| 2      | 10.798        | BB   | 0.1757      | 362.35123    | 29.84251     | 2.0601  |
| 3      | 13.044        | BV   | 0.1528      | 467.03598    | 45.85099     | 2.6553  |

Totals : 1.75889e4 2034.86770

Signal 2: DAD1 C, Sig=210,8 Ref=off

| Peak # | RetTime [min] | Type | Width [min] | Area [mAU*s] | Height [mAU] | Area %  |
|--------|---------------|------|-------------|--------------|--------------|---------|
| 1      | 10.003        | BV   | 0.1807      | 2.97224e4    | 2613.60645   | 94.6144 |
| 2      | 10.798        | VV   | 0.2239      | 966.52844    | 59.38451     | 3.0767  |

Data File C:\CHEM32\1\DATA\LAXMAN\LDVII55-1-RUN01.D  
Sample Name: LD-VII-55-1A-run1

| Peak # | RetTime [min] | Type | Width [min] | Area [mAU*s] | Height [mAU] | Area % |
|--------|---------------|------|-------------|--------------|--------------|--------|
| 3      | 13.044        | BV   | 0.1521      | 725.30652    | 71.63013     | 2.3088 |

Totals : 3.14143e4 2744.62109

Signal 3: DAD1 E, Sig=280,16 Ref=off

| Peak # | RetTime [min] | Type | Width [min] | Area [mAU*s] | Height [mAU] | Area %  |
|--------|---------------|------|-------------|--------------|--------------|---------|
| 1      | 10.003        | BB   | 0.1331      | 1.46707e4    | 1727.81067   | 94.7674 |
| 2      | 10.798        | BB   | 0.1781      | 385.23578    | 31.18816     | 2.4885  |
| 3      | 13.044        | BV   | 0.1532      | 424.80612    | 41.59309     | 2.7441  |

Totals : 1.54808e4 1800.59192

Signal 4: DAD1 G, Sig=300,16 Ref=off

| Peak # | RetTime [min] | Type | Width [min] | Area [mAU*s] | Height [mAU] | Area %  |
|--------|---------------|------|-------------|--------------|--------------|---------|
| 1      | 10.003        | VV   | 0.1358      | 1.73904e4    | 1992.41077   | 89.9899 |
| 2      | 10.798        | VB   | 0.2316      | 1108.33960   | 65.42634     | 5.7353  |
| 3      | 13.045        | BV   | 0.1613      | 826.08325    | 75.69793     | 4.2747  |

Totals : 1.93248e4 2133.53503

Signal 5: DAD1 H, Sig=320,16 Ref=off

| Peak # | RetTime [min] | Type | Width [min] | Area [mAU*s] | Height [mAU] | Area %  |
|--------|---------------|------|-------------|--------------|--------------|---------|
| 1      | 10.003        | VV   | 0.1365      | 1.77261e4    | 2018.29065   | 87.3120 |
| 2      | 10.798        | VB   | 0.2320      | 1536.88574   | 90.55610     | 7.5701  |
| 3      | 13.045        | BV   | 0.1596      | 1039.03064   | 96.51353     | 5.1179  |

Totals : 2.03020e4 2205.36028

=====  
\*\*\* End of Report \*\*\*

# Mass Spectrum of Compound 37

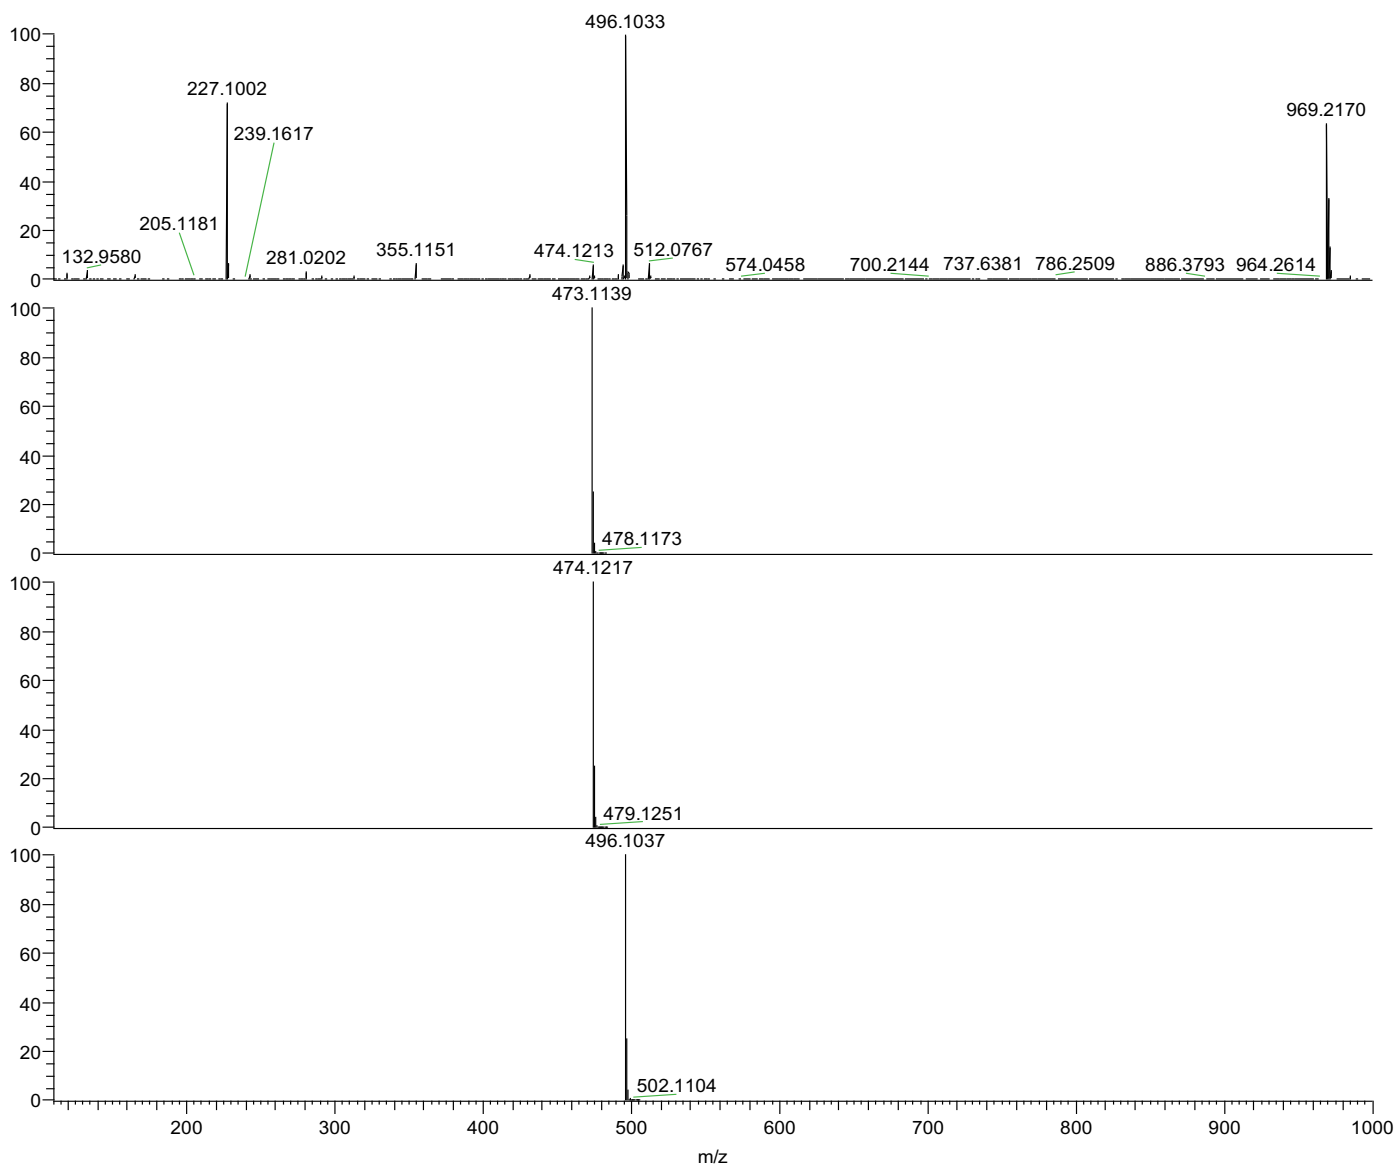

NL:  
2.72E7  
LD-VII-55-rerun\_Orbi\_+  
ES#1 RT: 0.00 AV: 1  
T: FTMS + p ESI Full  
ms [110.00-1000.00]

NL:  
7.22E5  
C<sub>23</sub>H<sub>23</sub>NO<sub>8</sub>S:  
C<sub>23</sub>H<sub>23</sub>N<sub>1</sub>O<sub>8</sub>S<sub>1</sub>  
pa Chrg 1

NL:  
7.22E5  
C<sub>23</sub>H<sub>23</sub>NO<sub>8</sub>S +H:  
C<sub>23</sub>H<sub>24</sub>N<sub>1</sub>O<sub>8</sub>S<sub>1</sub>  
pa Chrg 1

NL:  
7.22E5  
C<sub>23</sub>H<sub>23</sub>NO<sub>8</sub>S +Na:  
C<sub>23</sub>H<sub>23</sub>N<sub>1</sub>O<sub>8</sub>S<sub>1</sub>Na<sub>1</sub>  
pa Chrg 1

$^1\text{H}$  NMR (500 MHz,  $\text{CDCl}_3$ ) of Compound **38**

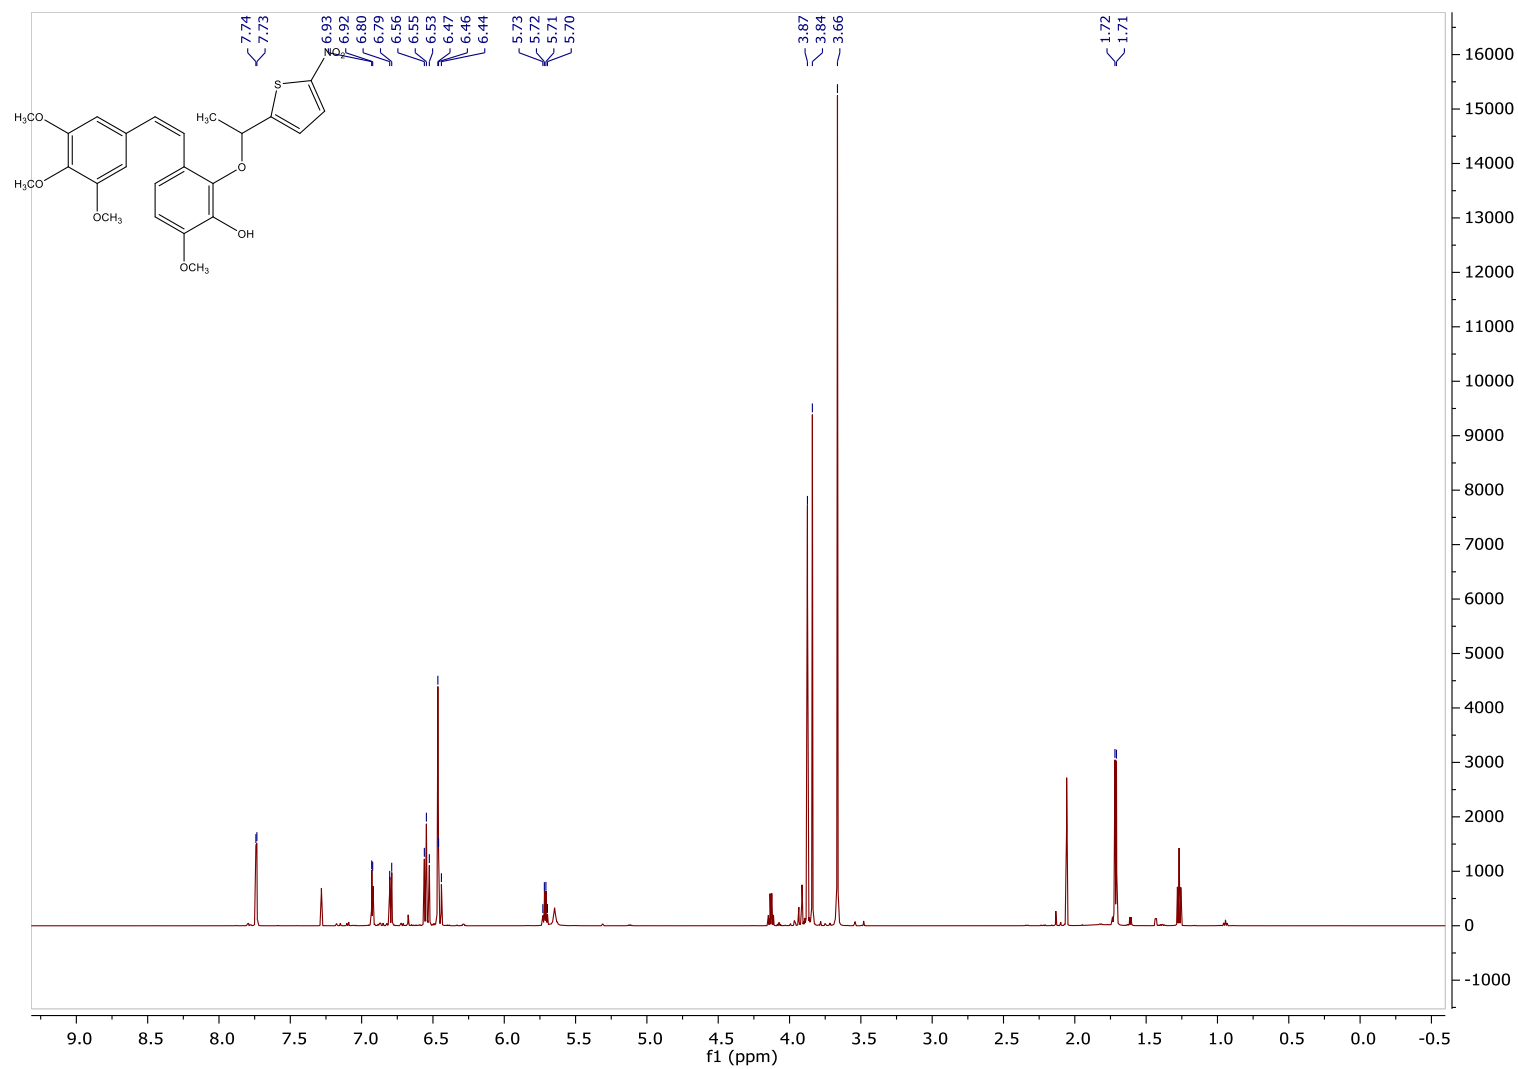

<sup>13</sup>C NMR (500 MHz, CDCl<sub>3</sub>) of Compound **38**

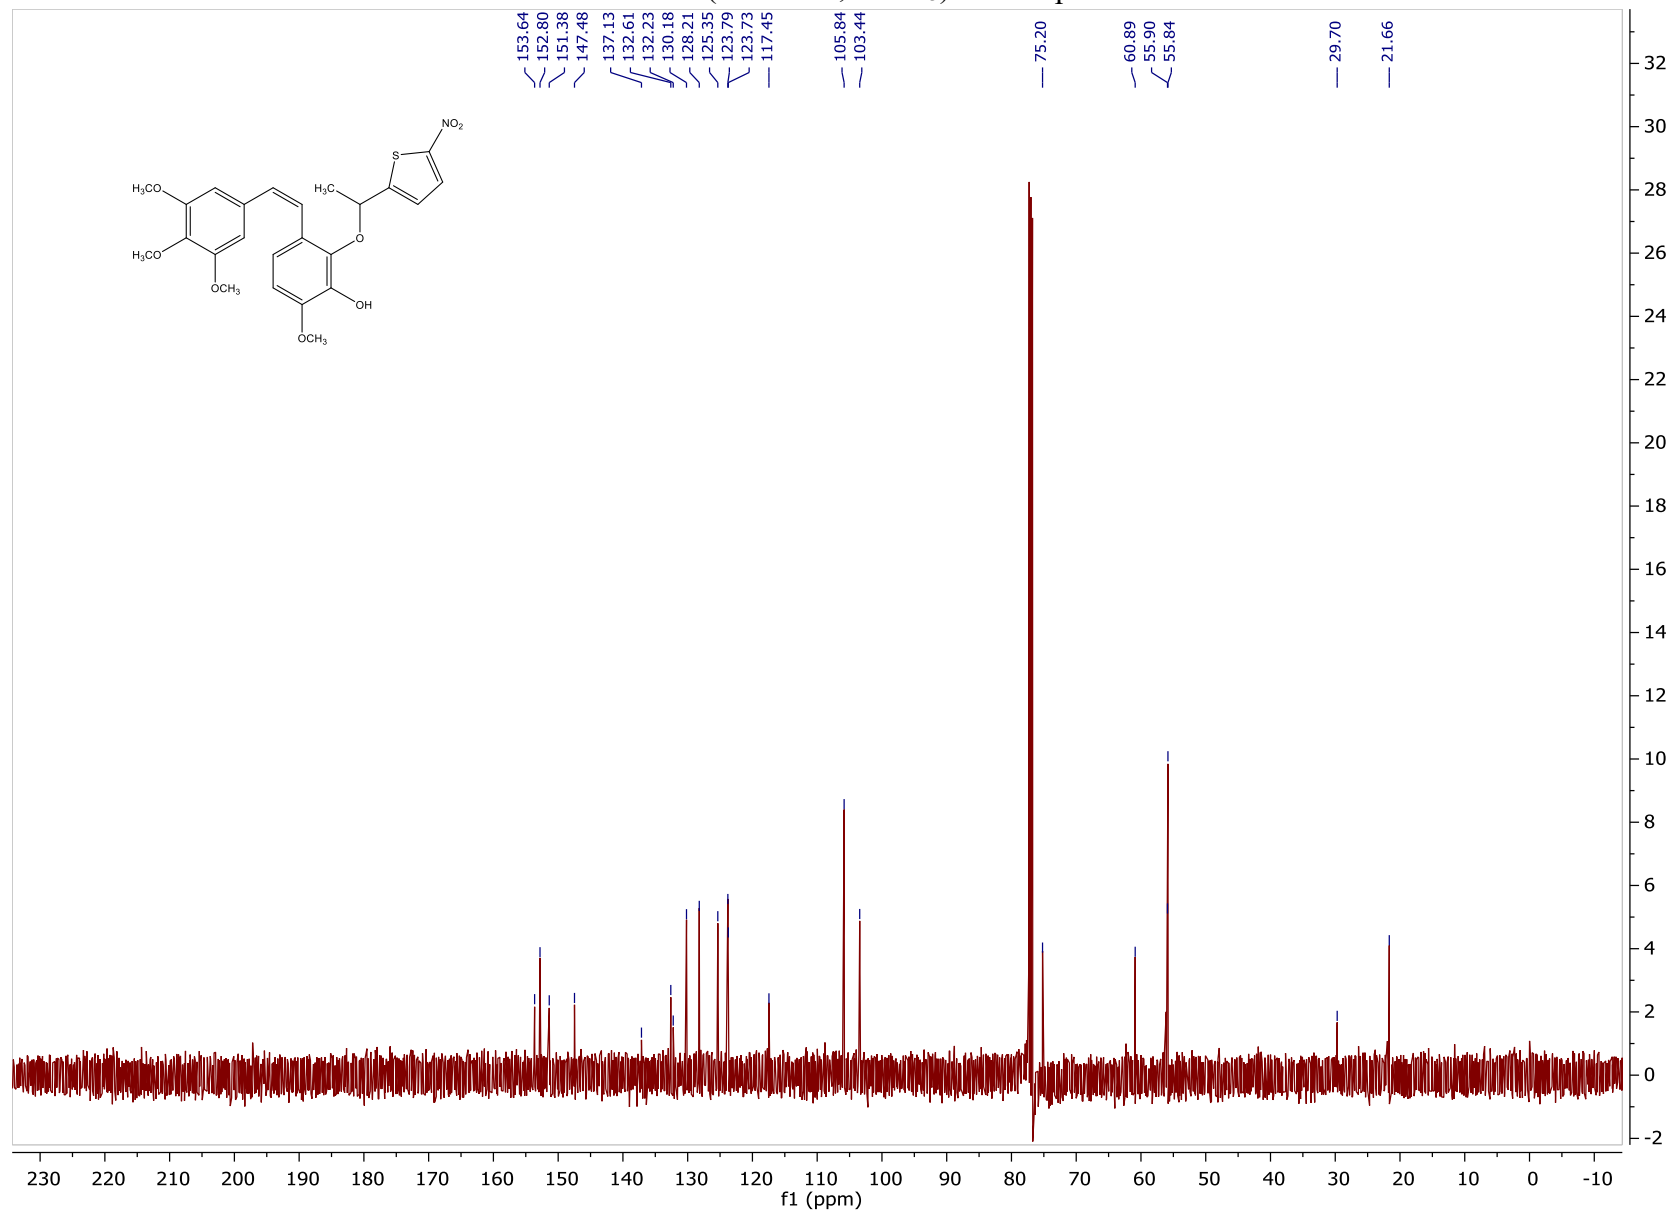

## HPLC Trace of Compound 38

Data File C:\Chem32\1\Data\Blake\wash.D  
Sample Name: wash

```
=====
Acq. Operator   : SYSTEM
Sample Operator : SYSTEM
Acq. Instrument : 1200 HPLC                      Location :      -
Injection Date  : 9/27/2016 8:32:29 PM           Inj Volume : No inj

Acq. Method     : C:\CHEM32\1\METHODS\GRAD 2 50-90 ACN.M
Last changed    : 4/30/2014 1:53:57 AM by ERICAP
Analysis Method : C:\CHEM32\1\METHODS\RT-ACNWASH 2.M
Last changed    : 7/9/2015 2:27:22 PM by Blake
Method Info     : General Column Wash Method
```

Additional Info : Peak(s) manually integrated

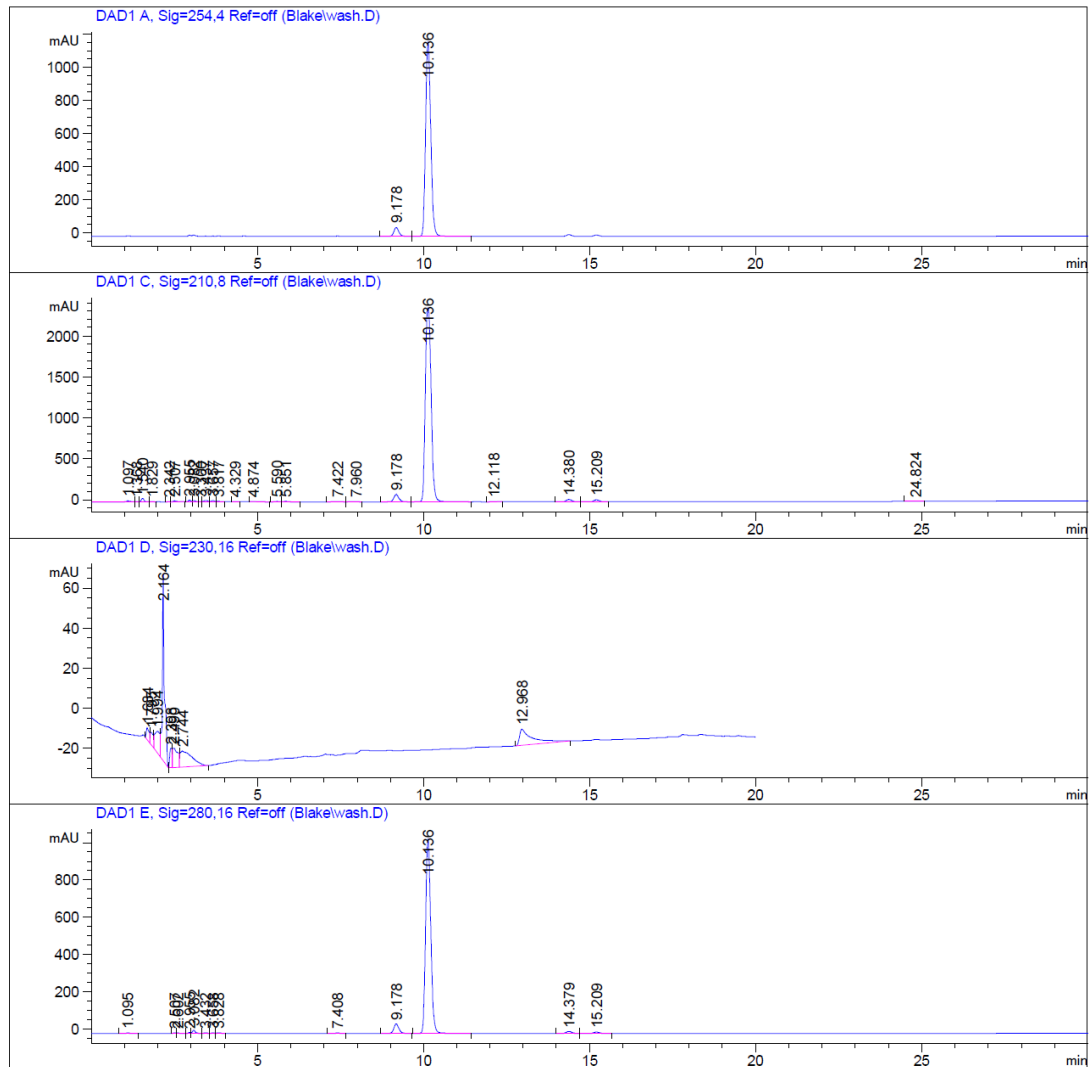

Data File C:\Chem32\1\Data\Blake\wash.D  
Sample Name: wash

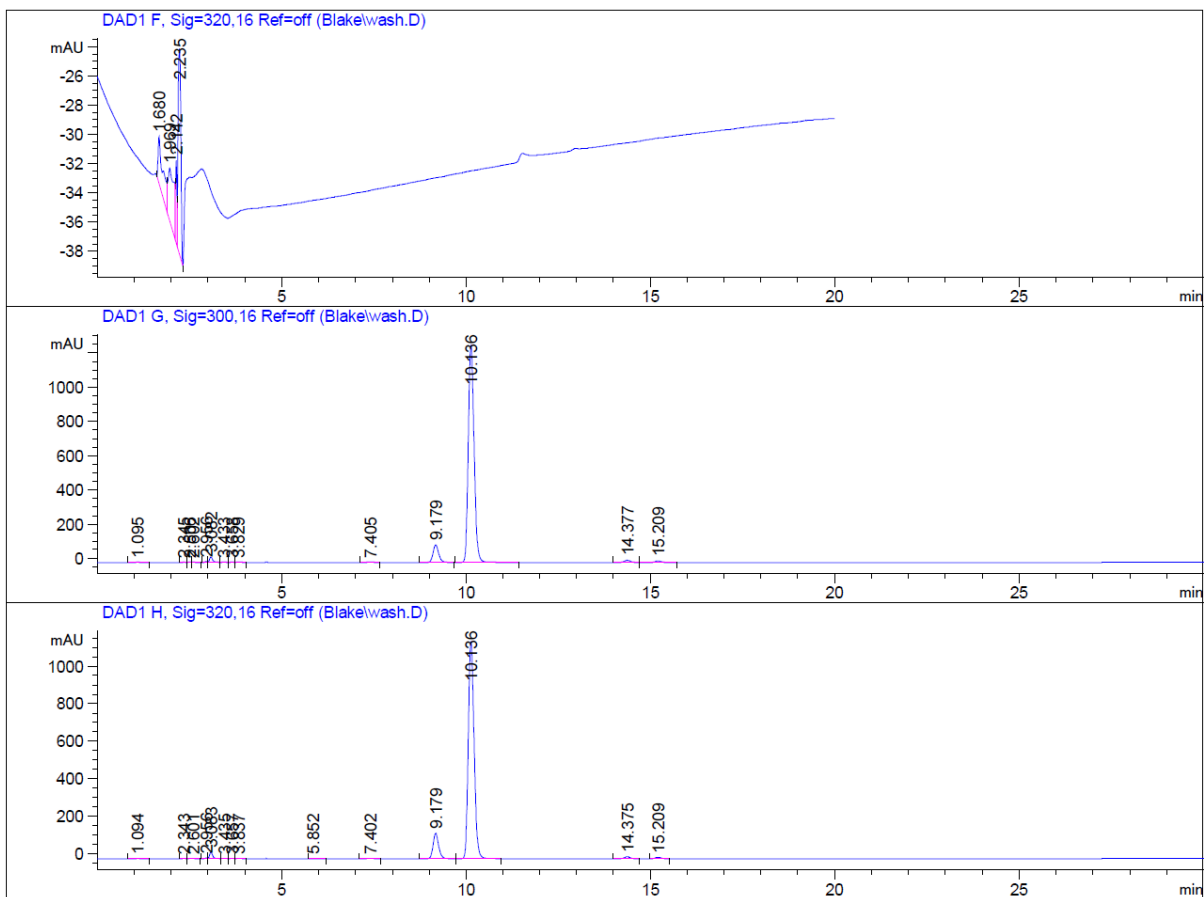

=====  
Area Percent Report  
=====

Sorted By : Signal  
Multiplier : 1.0000  
Dilution : 1.0000  
Use Multiplier & Dilution Factor with ISTDs

Signal 1: DAD1 A, Sig=254,4 Ref=off

| Peak # | RetTime [min] | Type | Width [min] | Area [mAU*s] | Height [mAU] | Area %  |
|--------|---------------|------|-------------|--------------|--------------|---------|
| 1      | 9.178         | BB   | 0.1647      | 575.78760    | 53.86548     | 4.3780  |
| 2      | 10.136        | BB   | 0.1669      | 1.25761e4    | 1174.37427   | 95.6220 |

Totals : 1.31518e4 1228.23975

Data File C:\Chem32\1\Data\Blake\wash.D  
Sample Name: wash

Signal 2: DAD1 C, Sig=210,8 Ref=off

| Peak # | RetTime [min] | Type | Width [min] | Area [mAU*s] | Height [mAU] | Area %  |
|--------|---------------|------|-------------|--------------|--------------|---------|
| 1      | 1.097         | BV   | 0.1320      | 136.03398    | 13.68161     | 0.4357  |
| 2      | 1.368         | VV   | 0.0703      | 12.33870     | 2.55526      | 0.0395  |
| 3      | 1.540         | VV   | 0.0834      | 244.72534    | 45.03909     | 0.7839  |
| 4      | 1.829         | VB   | 0.1006      | 9.03021      | 1.34108      | 0.0289  |
| 5      | 2.342         | BV   | 0.0697      | 10.77329     | 2.34061      | 0.0345  |
| 6      | 2.507         | VB   | 0.1222      | 104.57416    | 11.93351     | 0.3350  |
| 7      | 2.955         | BV   | 0.0832      | 102.11187    | 18.84634     | 0.3271  |
| 8      | 3.082         | VB   | 0.0869      | 83.05157     | 14.47536     | 0.2660  |
| 9      | 3.300         | BV   | 0.0611      | 8.05128      | 2.08455      | 0.0258  |
| 10     | 3.437         | VV   | 0.1378      | 106.61871    | 12.46211     | 0.3415  |
| 11     | 3.657         | VV   | 0.1006      | 80.88427     | 12.31509     | 0.2591  |
| 12     | 3.817         | VB   | 0.1048      | 42.89491     | 6.04386      | 0.1374  |
| 13     | 4.329         | BB   | 0.1209      | 23.56181     | 3.16331      | 0.0755  |
| 14     | 4.874         | BB   | 0.2170      | 19.74468     | 1.20575      | 0.0632  |
| 15     | 5.590         | BV   | 0.1370      | 55.60751     | 6.29734      | 0.1781  |
| 16     | 5.851         | VB   | 0.1489      | 69.15494     | 7.02185      | 0.2215  |
| 17     | 7.422         | BV   | 0.2089      | 74.75564     | 5.22441      | 0.2394  |
| 18     | 7.960         | VB   | 0.2152      | 45.88793     | 3.02121      | 0.1470  |
| 19     | 9.178         | BV   | 0.1670      | 978.68933    | 89.93841     | 3.1348  |
| 20     | 10.136        | VB   | 0.1901      | 2.84074e4    | 2364.92432   | 90.9899 |
| 21     | 12.118        | BB   | 0.1855      | 14.03423     | 1.19036      | 0.0450  |
| 22     | 14.380        | BV   | 0.1724      | 301.84442    | 26.99912     | 0.9668  |
| 23     | 15.209        | VB   | 0.1833      | 263.51685    | 21.76087     | 0.8441  |
| 24     | 24.824        | BB   | 0.1987      | 25.10380     | 1.94365      | 0.0804  |

Totals : 3.12204e4 2675.80906

Signal 3: DAD1 D, Sig=230,16 Ref=off

| Peak # | RetTime [min] | Type | Width [min] | Area [mAU*s] | Height [mAU] | Area %  |
|--------|---------------|------|-------------|--------------|--------------|---------|
| 1      | 1.684         | BV   | 0.0840      | 35.62299     | 5.93305      | 2.9175  |
| 2      | 1.795         | VV   | 0.0921      | 42.89725     | 6.25040      | 3.5133  |
| 3      | 1.994         | VV   | 0.1386      | 112.01411    | 11.02189     | 9.1740  |
| 4      | 2.164         | VB   | 0.0678      | 449.19000    | 93.95271     | 36.7888 |
| 5      | 2.398         | BV   | 0.0788      | 50.80936     | 9.74313      | 4.1613  |
| 6      | 2.490         | VV   | 0.1384      | 102.15647    | 9.73474      | 8.3666  |
| 7      | 2.744         | VB   | 0.3176      | 206.77625    | 7.99775      | 16.9350 |
| 8      | 12.968        | BB   | 0.3564      | 221.53159    | 8.16957      | 18.1435 |

Totals : 1220.99802 152.80325

Data File C:\Chem32\1\Data\Blake\wash.D  
Sample Name: wash

Signal 4: DAD1 E, Sig=280,16 Ref=off

| Peak # | RetTime [min] | Type | Width [min] | Area [mAU*s] | Height [mAU] | Area %  |
|--------|---------------|------|-------------|--------------|--------------|---------|
| 1      | 1.095         | BB   | 0.1203      | 23.23680     | 2.59926      | 0.1911  |
| 2      | 2.507         | VV   | 0.0825      | 13.25547     | 2.39738      | 0.1090  |
| 3      | 2.602         | VB   | 0.0799      | 11.86713     | 2.16566      | 0.0976  |
| 4      | 2.955         | BV   | 0.0778      | 23.27455     | 4.69450      | 0.1914  |
| 5      | 3.082         | VB   | 0.0850      | 99.69138     | 17.36660     | 0.8198  |
| 6      | 3.432         | BB   | 0.1141      | 8.99181      | 1.30945      | 0.0739  |
| 7      | 3.658         | BV   | 0.0895      | 8.01711      | 1.42729      | 0.0659  |
| 8      | 3.828         | VB   | 0.1285      | 17.14674     | 2.11773      | 0.1410  |
| 9      | 7.408         | BB   | 0.1763      | 18.24699     | 1.56190      | 0.1501  |
| 10     | 9.178         | BB   | 0.1644      | 553.62714    | 51.93246     | 4.5528  |
| 11     | 10.136        | BB   | 0.1669      | 1.11720e4    | 1043.97192   | 91.8739 |
| 12     | 14.379        | BB   | 0.1690      | 122.91336    | 11.11768     | 1.0108  |
| 13     | 15.209        | BB   | 0.1837      | 87.87356     | 7.23654      | 0.7226  |

Totals : 1.21602e4 1149.89837

Signal 5: DAD1 F, Sig=320,16 Ref=off

| Peak # | RetTime [min] | Type | Width [min] | Area [mAU*s] | Height [mAU] | Area %  |
|--------|---------------|------|-------------|--------------|--------------|---------|
| 1      | 1.680         | BV   | 0.1282      | 31.92470     | 3.26162      | 19.7916 |
| 2      | 1.969         | VV   | 0.1516      | 42.04145     | 3.61721      | 26.0634 |
| 3      | 2.142         | VV   | 0.0422      | 14.54720     | 5.74288      | 9.0185  |
| 4      | 2.235         | VB   | 0.0862      | 72.79123     | 14.09685     | 45.1266 |

Totals : 161.30458 26.71855

Signal 6: DAD1 G, Sig=300,16 Ref=off

| Peak # | RetTime [min] | Type | Width [min] | Area [mAU*s] | Height [mAU] | Area %  |
|--------|---------------|------|-------------|--------------|--------------|---------|
| 1      | 1.095         | BB   | 0.1158      | 20.06848     | 2.34592      | 0.1311  |
| 2      | 2.345         | BV   | 0.0891      | 8.57328      | 1.44754      | 0.0560  |
| 3      | 2.506         | VV   | 0.0789      | 9.90580      | 1.83700      | 0.0647  |
| 4      | 2.602         | VB   | 0.0802      | 12.84264     | 2.33244      | 0.0839  |
| 5      | 2.956         | BV   | 0.0738      | 24.54047     | 5.12679      | 0.1603  |
| 6      | 3.082         | VB   | 0.0868      | 182.88321    | 31.91949     | 1.1949  |
| 7      | 3.433         | BB   | 0.1152      | 8.80266      | 1.29695      | 0.0575  |
| 8      | 3.658         | BV   | 0.0890      | 7.88855      | 1.41603      | 0.0515  |
| 9      | 3.829         | VB   | 0.1365      | 16.91241     | 2.00245      | 0.1105  |
| 10     | 7.405         | BB   | 0.1704      | 26.67171     | 2.35090      | 0.1743  |
| 11     | 9.179         | BB   | 0.1639      | 1102.77478   | 103.80939    | 7.2051  |
| 12     | 10.136        | BB   | 0.1673      | 1.36339e4    | 1269.69946   | 89.0786 |
| 13     | 14.377        | BB   | 0.1741      | 145.54846    | 12.85734     | 0.9510  |
| 14     | 15.209        | BB   | 0.1804      | 104.16794    | 8.77950      | 0.6806  |

Data File C:\Chem32\1\Data\Blake\wash.D  
Sample Name: wash

| Peak #   | RetTime [min] | Type | Width [min] | Area [mAU*s] | Height [mAU] | Area % |
|----------|---------------|------|-------------|--------------|--------------|--------|
| Totals : |               |      |             | 1.53055e4    | 1447.22120   |        |

Signal 7: DAD1 H, Sig=320,16 Ref=off

| Peak # | RetTime [min] | Type | Width [min] | Area [mAU*s] | Height [mAU] | Area %  |
|--------|---------------|------|-------------|--------------|--------------|---------|
| 1      | 1.094         | BB   | 0.1136      | 17.27962     | 2.06573      | 0.1198  |
| 2      | 2.343         | BV   | 0.0916      | 11.41241     | 1.86050      | 0.0791  |
| 3      | 2.601         | VB   | 0.1189      | 17.75151     | 2.05259      | 0.1231  |
| 4      | 2.956         | BV   | 0.0724      | 18.20128     | 3.90547      | 0.1262  |
| 5      | 3.083         | VV   | 0.0884      | 202.91699    | 34.59048     | 1.4070  |
| 6      | 3.435         | VB   | 0.1226      | 12.80356     | 1.72437      | 0.0888  |
| 7      | 3.657         | BV   | 0.0893      | 8.89841      | 1.58915      | 0.0617  |
| 8      | 3.837         | VB   | 0.1539      | 11.76254     | 1.24904      | 0.0816  |
| 9      | 5.852         | VB   | 0.1474      | 10.19680     | 1.04921      | 0.0707  |
| 10     | 7.402         | BB   | 0.1734      | 30.37993     | 2.61731      | 0.2106  |
| 11     | 9.179         | BB   | 0.1638      | 1439.05432   | 135.63530    | 9.9782  |
| 12     | 10.136        | BB   | 0.1671      | 1.24273e4    | 1159.30432   | 86.1692 |
| 13     | 14.375        | BB   | 0.1776      | 123.96412    | 10.66818     | 0.8595  |
| 14     | 15.209        | BB   | 0.1679      | 90.05003     | 8.34193      | 0.6244  |

Totals : 1.44220e4 1366.65357

\*\*\* End of Report \*\*\*

# Mass Spectrum of Compound 38

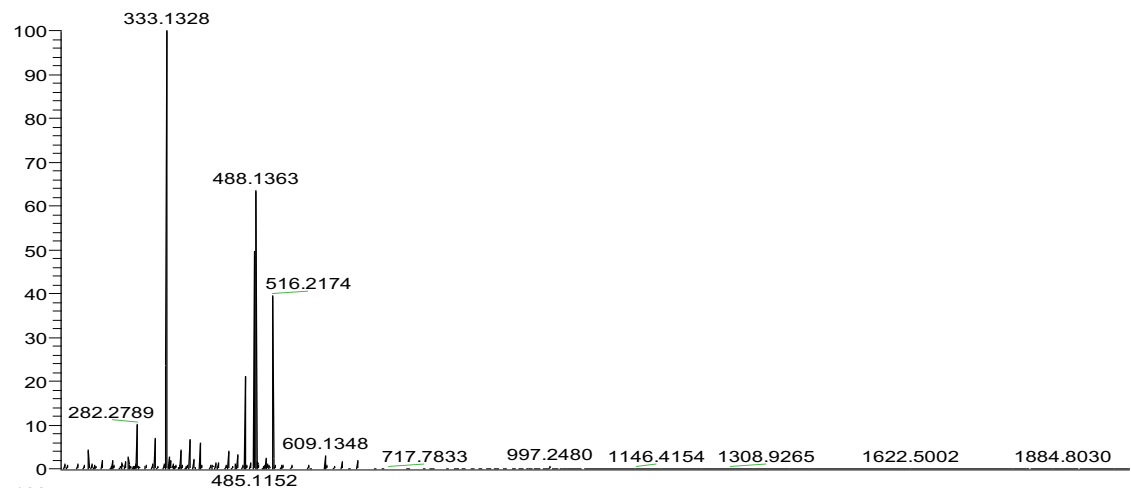

NL: 6.03E6  
Mono Major CA1b#1  
RT: 0.00 AV: 1 T:  
FTMS + p APCI corona  
pi Full ms  
[150.00-2000.00]

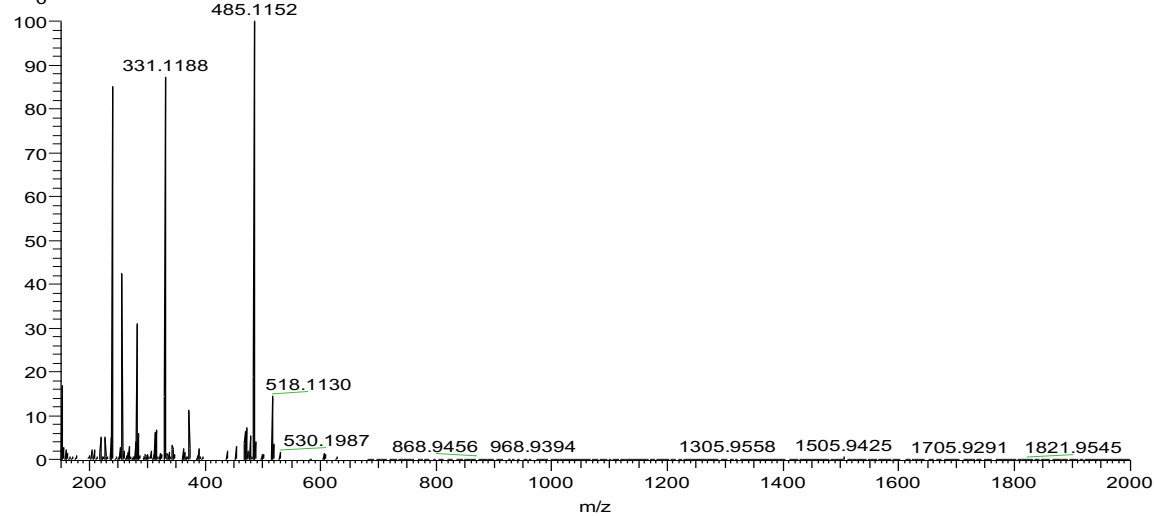

NL: 1.49E6  
mono major ca1 neg#1  
RT: 0.00 AV: 1 T:  
FTMS - p APCI corona  
pi Full ms  
[150.00-2000.00]

<sup>1</sup>H NMR (600 MHz, CDCl<sub>3</sub>) for Compound **39**

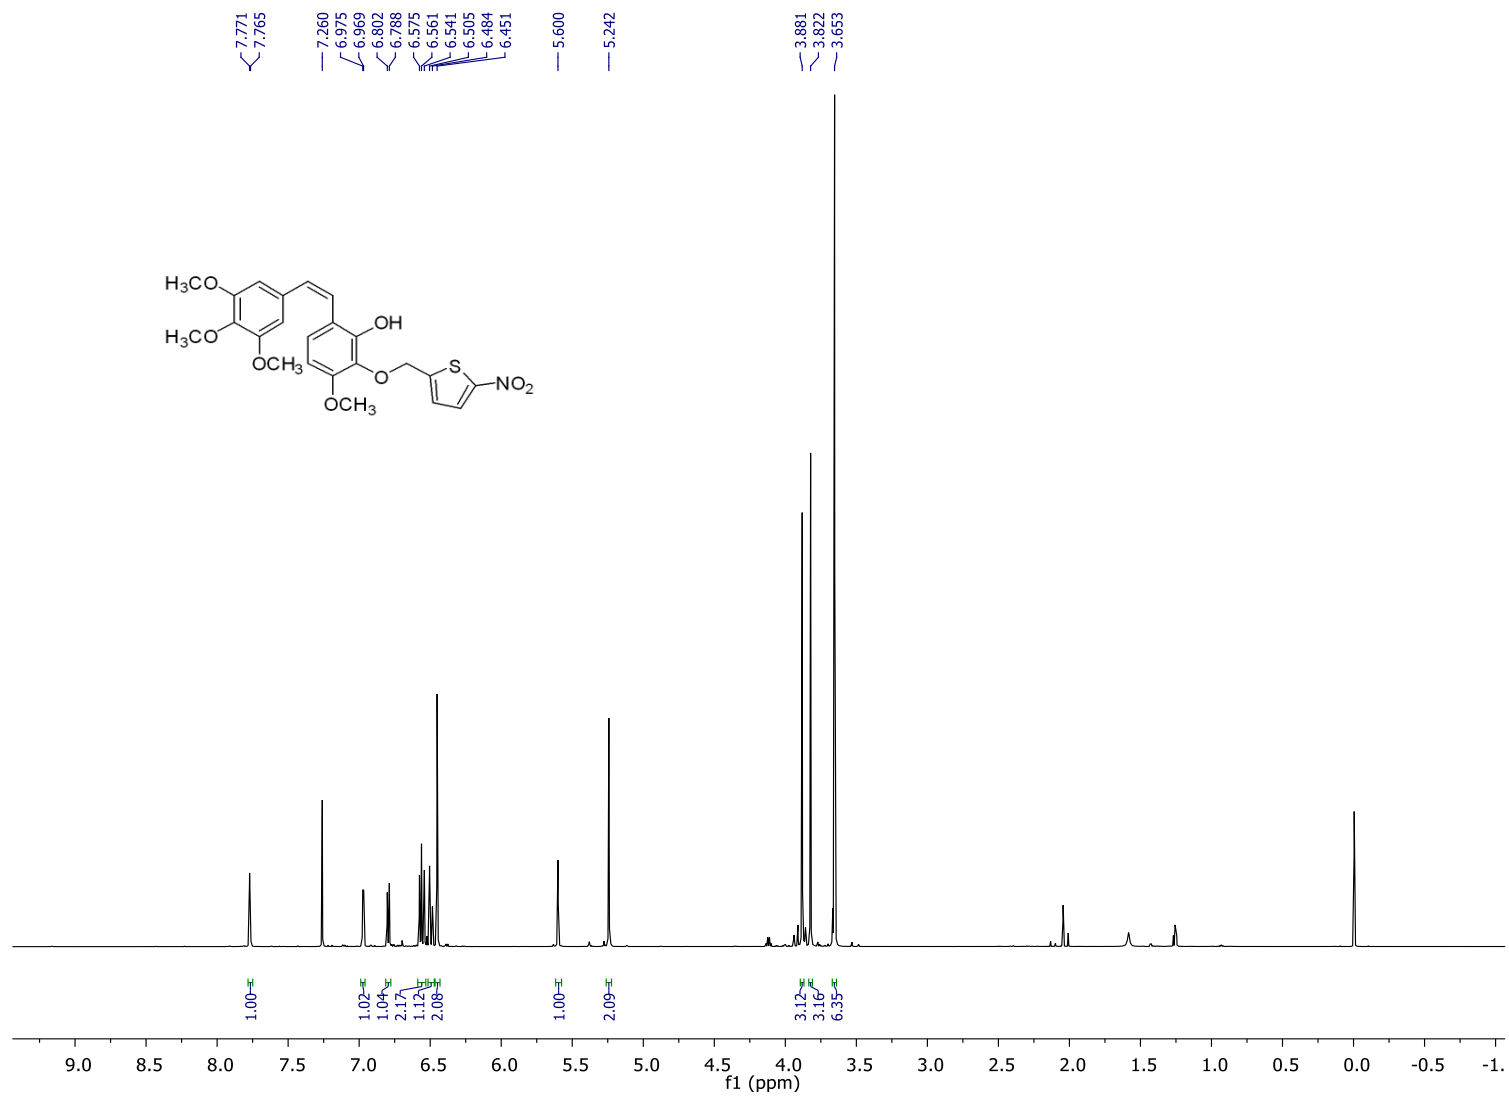

<sup>13</sup>C NMR (151 MHz, CDCl<sub>3</sub>) for Compound **39**

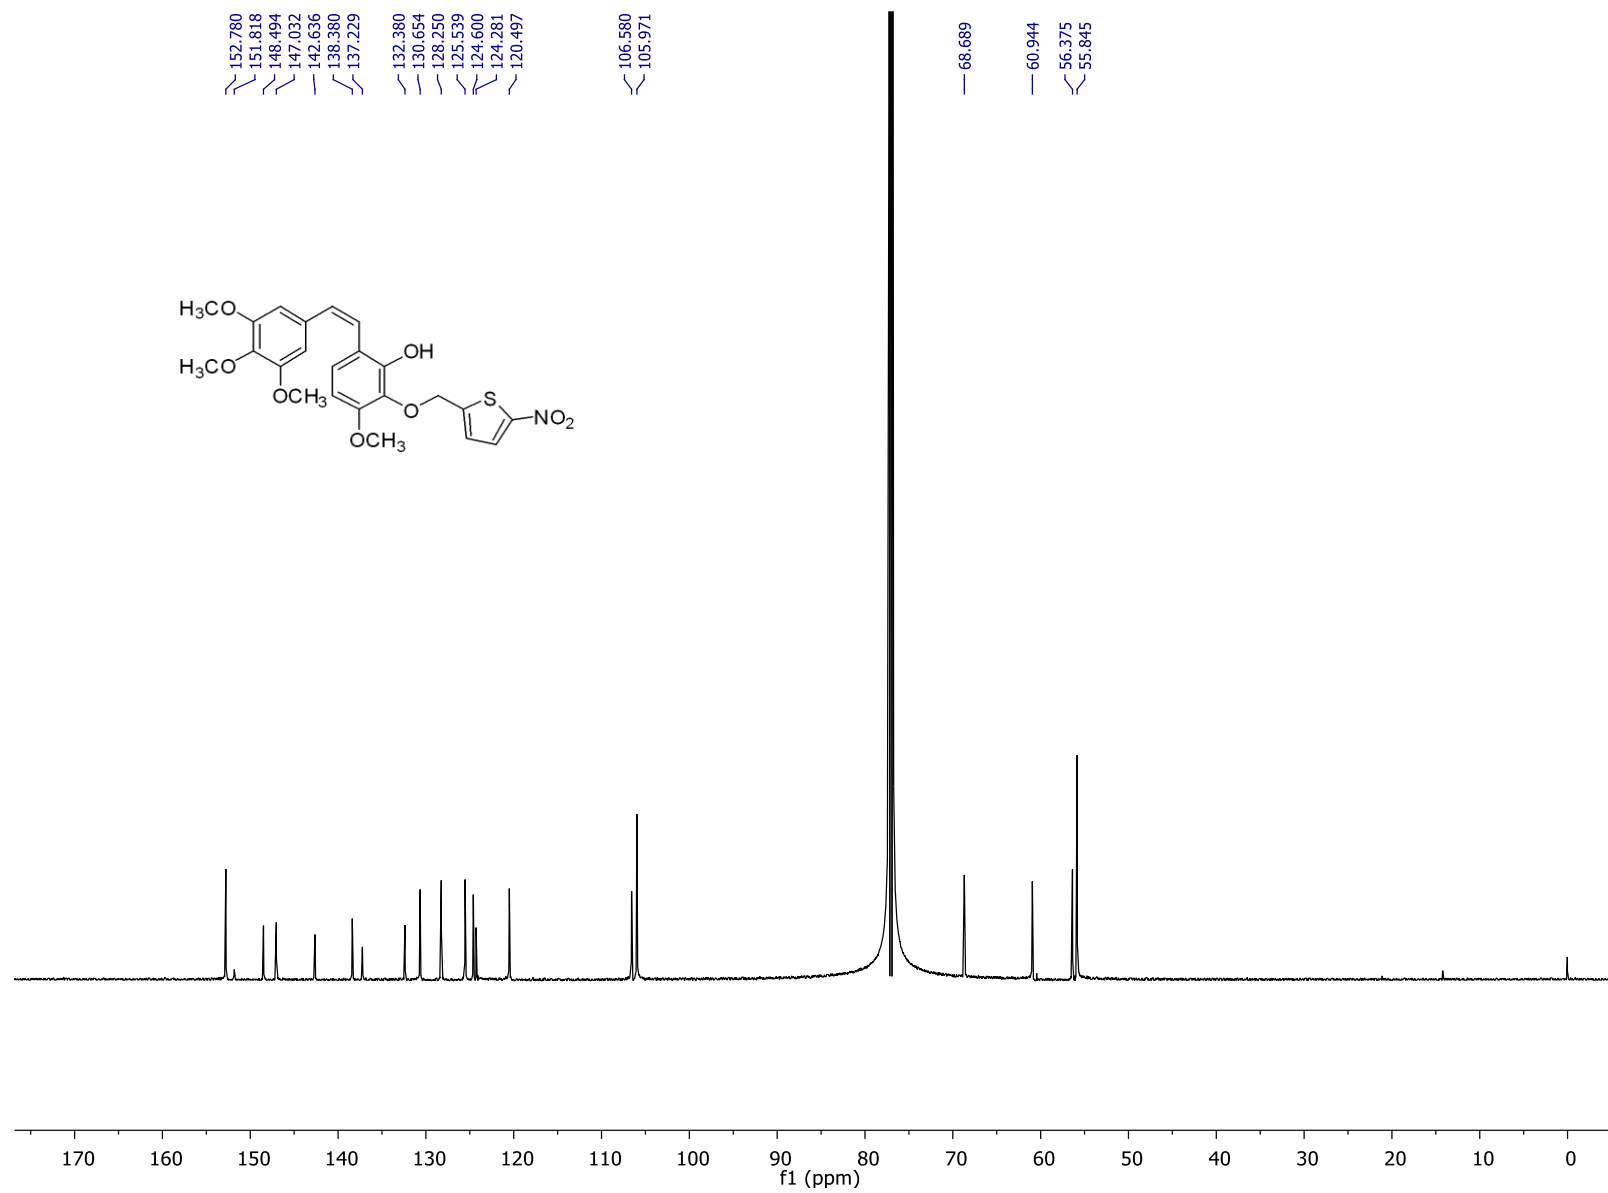

## HPLC Traces for Compound 39

Data File C:\CHEM32\1\DATA\LAXMAN\BK-I-89-BOTTOM2.D

Sample Name: BK-I-89-bottom-isomer-rerun

```
=====
Acq. Operator   : Laxman
Acq. Instrument : Instrument 1          Location :   -
Injection Date  : 7/8/2015 2:42:58 PM
Acq. Method     : C:\CHEM32\1\METHODS\GRAD 2 50-90 ACN.M
Last changed    : 7/8/2015 2:37:39 PM by Laxman
Analysis Method : C:\CHEM32\1\DATA\LAXMAN\BK-I-89-BOTTOM2.D\DA.M (GRAD 2 50-90 ACN.M)
Last changed    : 7/8/2015 3:28:55 PM by Laxman
Sample Info     : Method-Grad2 50-90% ACN
```

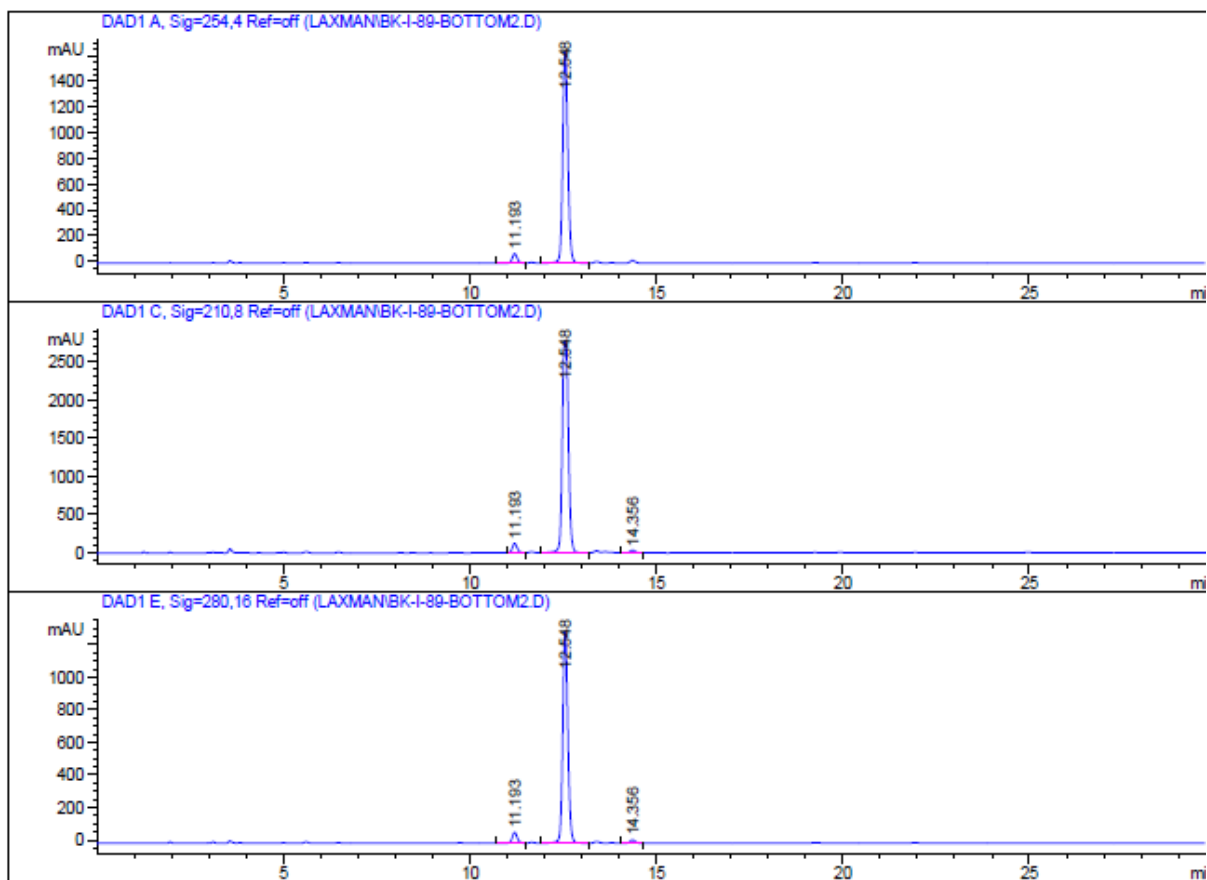

Data File C:\CHEM32\1\DATA\LAXMAN\BK-I-89-BOTTOM2.D  
Sample Name: BK-I-89-bottom-isomer-rerun

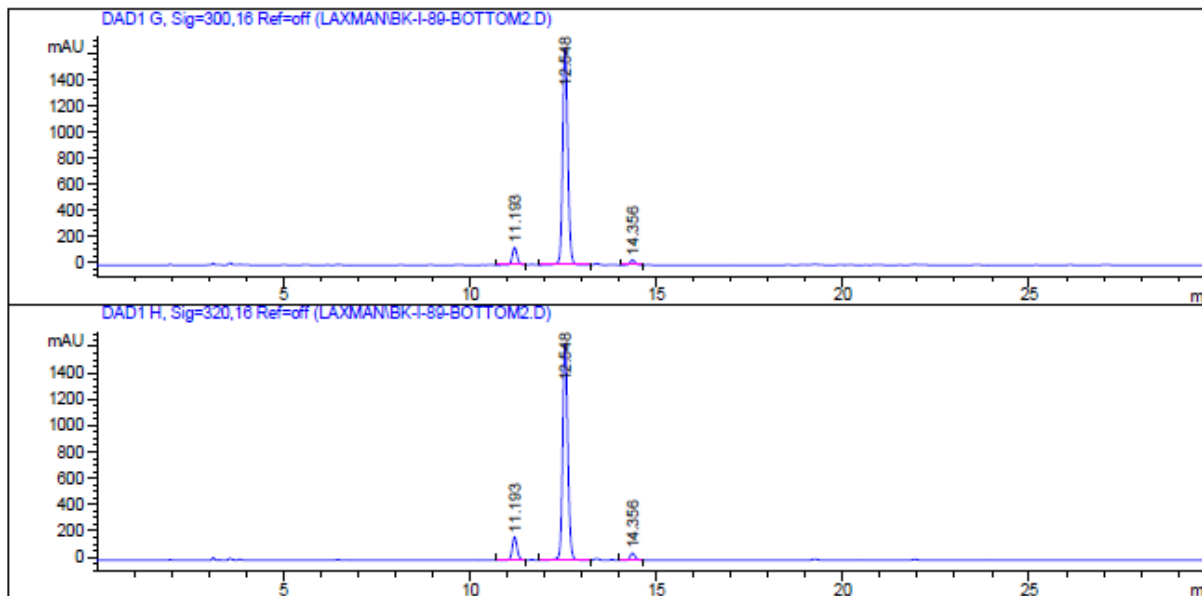

=====  
Area Percent Report  
=====

Sorted By : Signal  
Multiplier : 1.0000  
Dilution : 1.0000  
Use Multiplier & Dilution Factor with ISTDs

Signal 1: DAD1 A, Sig=254,4 Ref=off

| Peak # | RetTime [min] | Type | Width [min] | Area [mAU*s] | Height [mAU] | Area %  |
|--------|---------------|------|-------------|--------------|--------------|---------|
| 1      | 11.193        | BV   | 0.1415      | 686.84894    | 74.56828     | 4.1781  |
| 2      | 12.548        | BV   | 0.1472      | 1.57524e4    | 1652.59790   | 95.8219 |

Totals : 1.64393e4 1727.16618

Signal 2: DAD1 C, Sig=210,8 Ref=off

| Peak # | RetTime [min] | Type | Width [min] | Area [mAU*s] | Height [mAU] | Area %  |
|--------|---------------|------|-------------|--------------|--------------|---------|
| 1      | 11.193        | VB   | 0.1392      | 1117.05908   | 123.83302    | 3.3745  |
| 2      | 12.548        | BB   | 0.1808      | 3.16479e4    | 2780.26611   | 95.6037 |
| 3      | 14.356        | BV   | 0.1445      | 338.26584    | 36.38631     | 1.0219  |

Data File C:\CHEM32\1\DATA\LAXMAN\BK-I-89-BOTTOM2.D  
Sample Name: BK-I-89-bottom-isomer-rerun

| Peak #                                    | RetTime [min] | Type | Width [min] | Area [mAU*s] | Height [mAU] | Area % |
|-------------------------------------------|---------------|------|-------------|--------------|--------------|--------|
| ----- ----- ----- ----- ----- ----- ----- |               |      |             |              |              |        |
| Totals :                                  |               |      |             | 3.31032e4    | 2940.48544   |        |

Signal 3: DAD1 E, Sig=280,16 Ref=off

| Peak #                                    | RetTime [min] | Type | Width [min] | Area [mAU*s] | Height [mAU] | Area %  |
|-------------------------------------------|---------------|------|-------------|--------------|--------------|---------|
| ----- ----- ----- ----- ----- ----- ----- |               |      |             |              |              |         |
| 1                                         | 11.193        | BV   | 0.1410      | 610.41125    | 66.56650     | 4.6274  |
| 2                                         | 12.548        | BV   | 0.1468      | 1.23966e4    | 1305.82520   | 93.9761 |
| 3                                         | 14.356        | BB   | 0.1443      | 184.21126    | 19.83845     | 1.3965  |
| ----- ----- ----- ----- ----- ----- ----- |               |      |             |              |              |         |
| Totals :                                  |               |      |             | 1.31912e4    | 1392.23014   |         |

Signal 4: DAD1 G, Sig=300,16 Ref=off

| Peak #                                    | RetTime [min] | Type | Width [min] | Area [mAU*s] | Height [mAU] | Area %  |
|-------------------------------------------|---------------|------|-------------|--------------|--------------|---------|
| ----- ----- ----- ----- ----- ----- ----- |               |      |             |              |              |         |
| 1                                         | 11.193        | BV   | 0.1404      | 1228.46973   | 134.74460    | 7.0437  |
| 2                                         | 12.548        | BV   | 0.1473      | 1.58569e4    | 1661.58582   | 90.9187 |
| 3                                         | 14.356        | BV   | 0.1442      | 355.36490    | 38.30421     | 2.0376  |
| ----- ----- ----- ----- ----- ----- ----- |               |      |             |              |              |         |
| Totals :                                  |               |      |             | 1.74407e4    | 1834.63463   |         |

Signal 5: DAD1 H, Sig=320,16 Ref=off

| Peak #                                    | RetTime [min] | Type | Width [min] | Area [mAU*s] | Height [mAU] | Area %  |
|-------------------------------------------|---------------|------|-------------|--------------|--------------|---------|
| ----- ----- ----- ----- ----- ----- ----- |               |      |             |              |              |         |
| 1                                         | 11.193        | BV   | 0.1401      | 1616.99170   | 177.81357    | 9.0370  |
| 2                                         | 12.548        | BV   | 0.1474      | 1.57714e4    | 1651.39465   | 88.1433 |
| 3                                         | 14.356        | BV   | 0.1443      | 504.52426    | 54.32704     | 2.8197  |
| ----- ----- ----- ----- ----- ----- ----- |               |      |             |              |              |         |
| Totals :                                  |               |      |             | 1.78929e4    | 1883.53526   |         |

=====  
\*\*\* End of Report \*\*\*

# Mass Spectrum of Compound 39

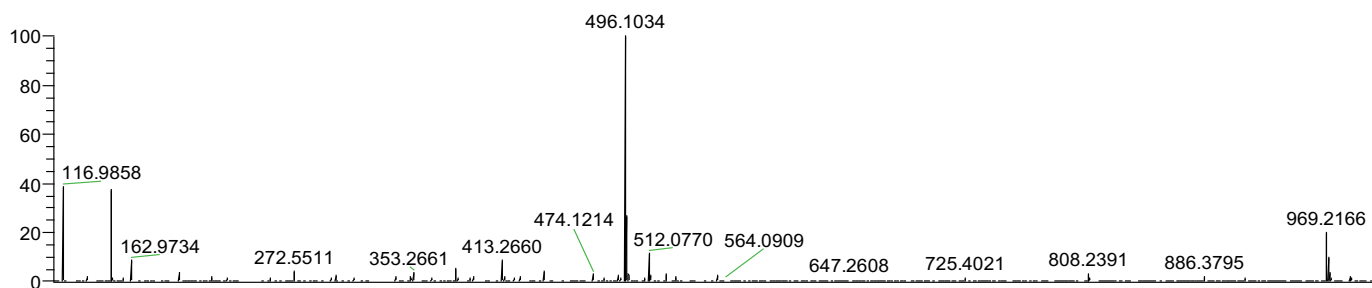

NL:  
1.77E7  
BK-I\_63-rerun\_Orbi\_+  
ES#1 RT: 0.00 AV: 1  
T: FTMS + p ESI Full  
ms [110.00-1000.00]

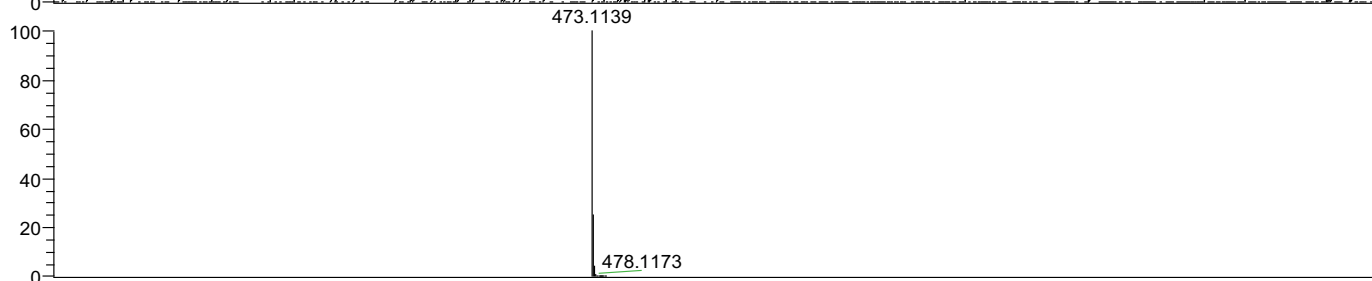

NL:  
7.22E5  
C<sub>23</sub>H<sub>23</sub>NO<sub>8</sub>S:  
C<sub>23</sub>H<sub>23</sub>N<sub>1</sub>O<sub>8</sub>S<sub>1</sub>  
pa Chrg 1

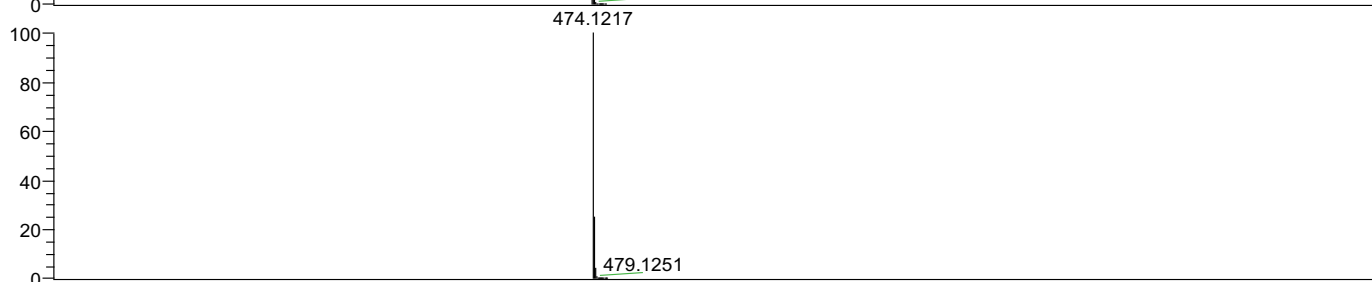

NL:  
7.22E5  
C<sub>23</sub>H<sub>23</sub>NO<sub>8</sub>S+H:  
C<sub>23</sub>H<sub>24</sub>N<sub>1</sub>O<sub>8</sub>S<sub>1</sub>  
pa Chrg 1

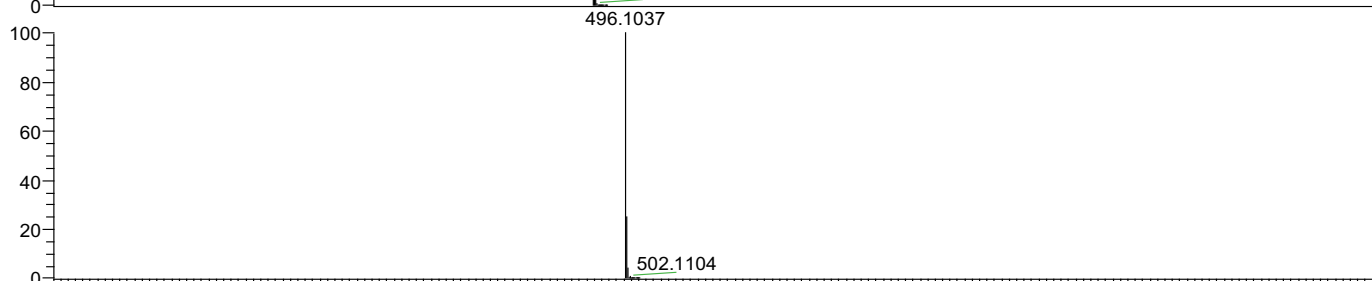

NL:  
7.22E5  
C<sub>23</sub>H<sub>23</sub>NO<sub>8</sub>S+Na:  
C<sub>23</sub>H<sub>23</sub>N<sub>1</sub>O<sub>8</sub>S<sub>1</sub>Na<sub>1</sub>  
pa Chrg 1

m/z

<sup>1</sup>H NMR (500 MHz, acetone *d*-6) of Compound **40**

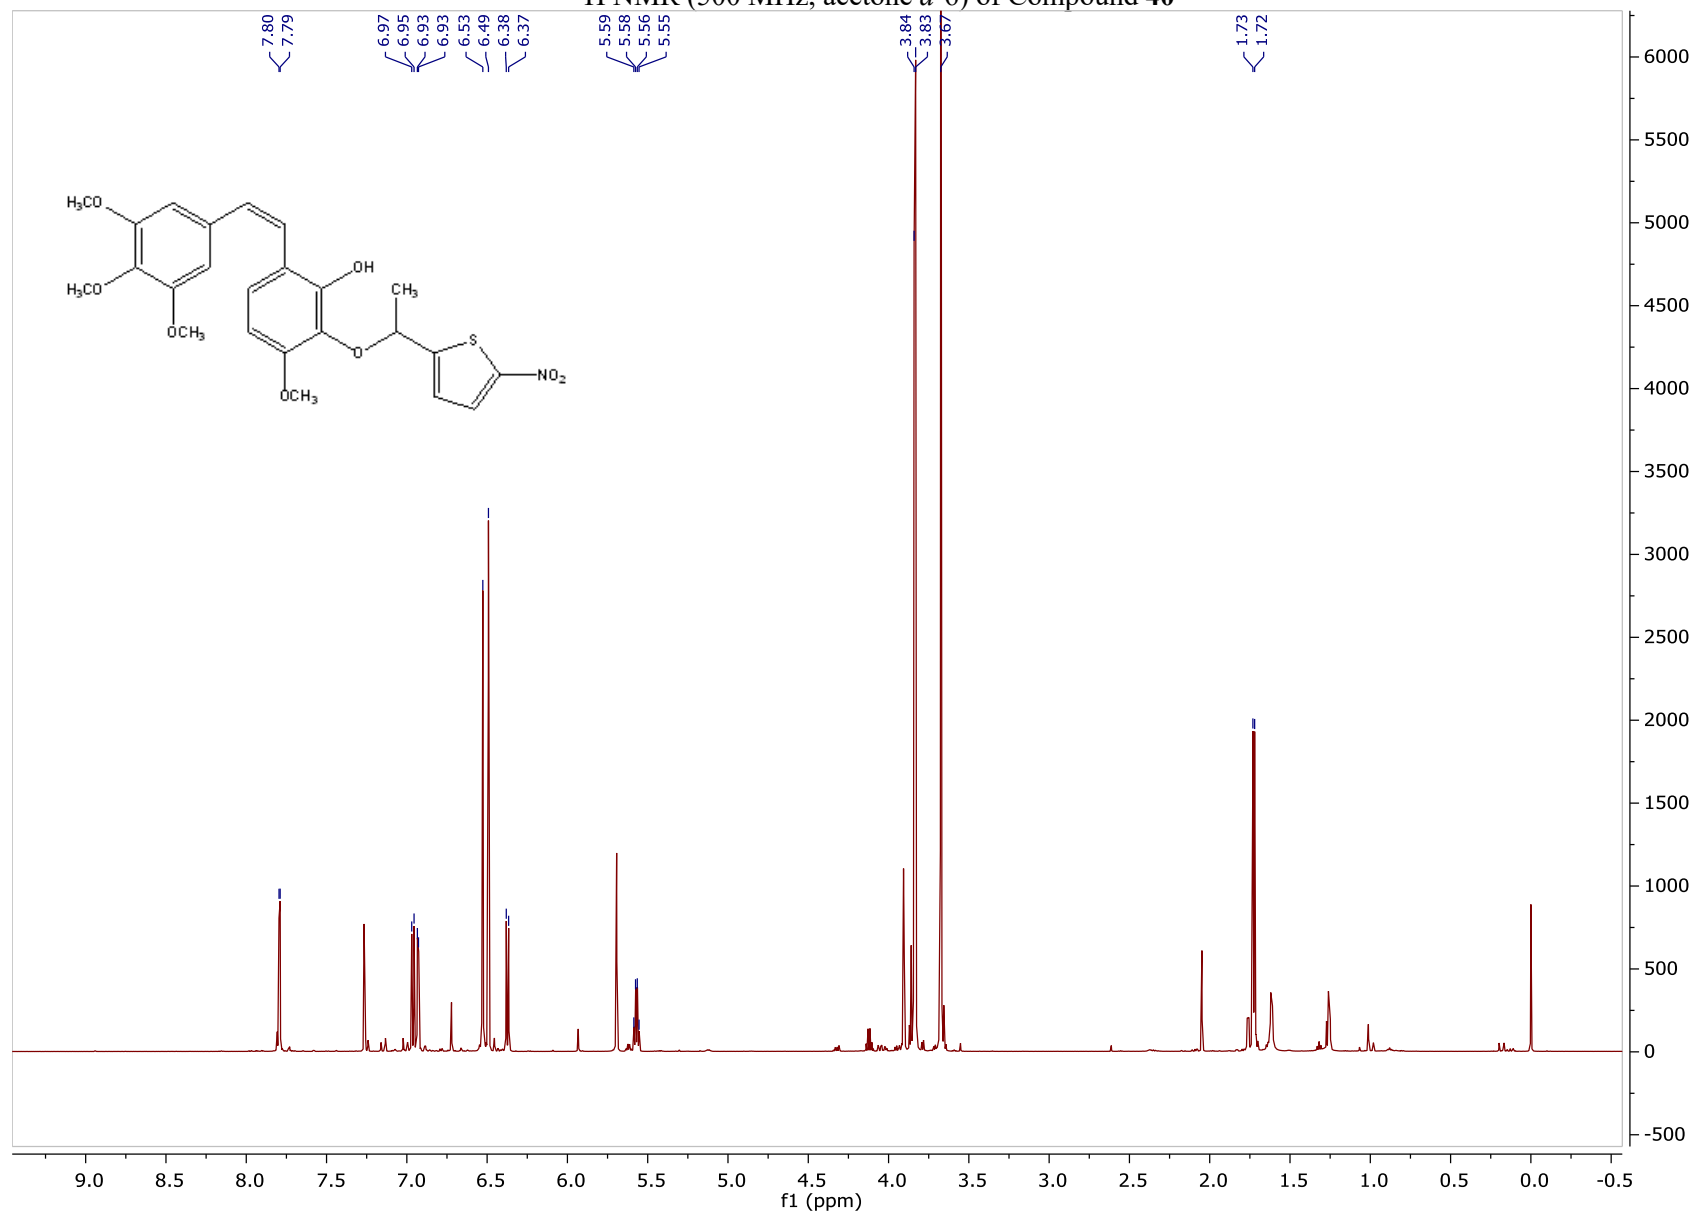

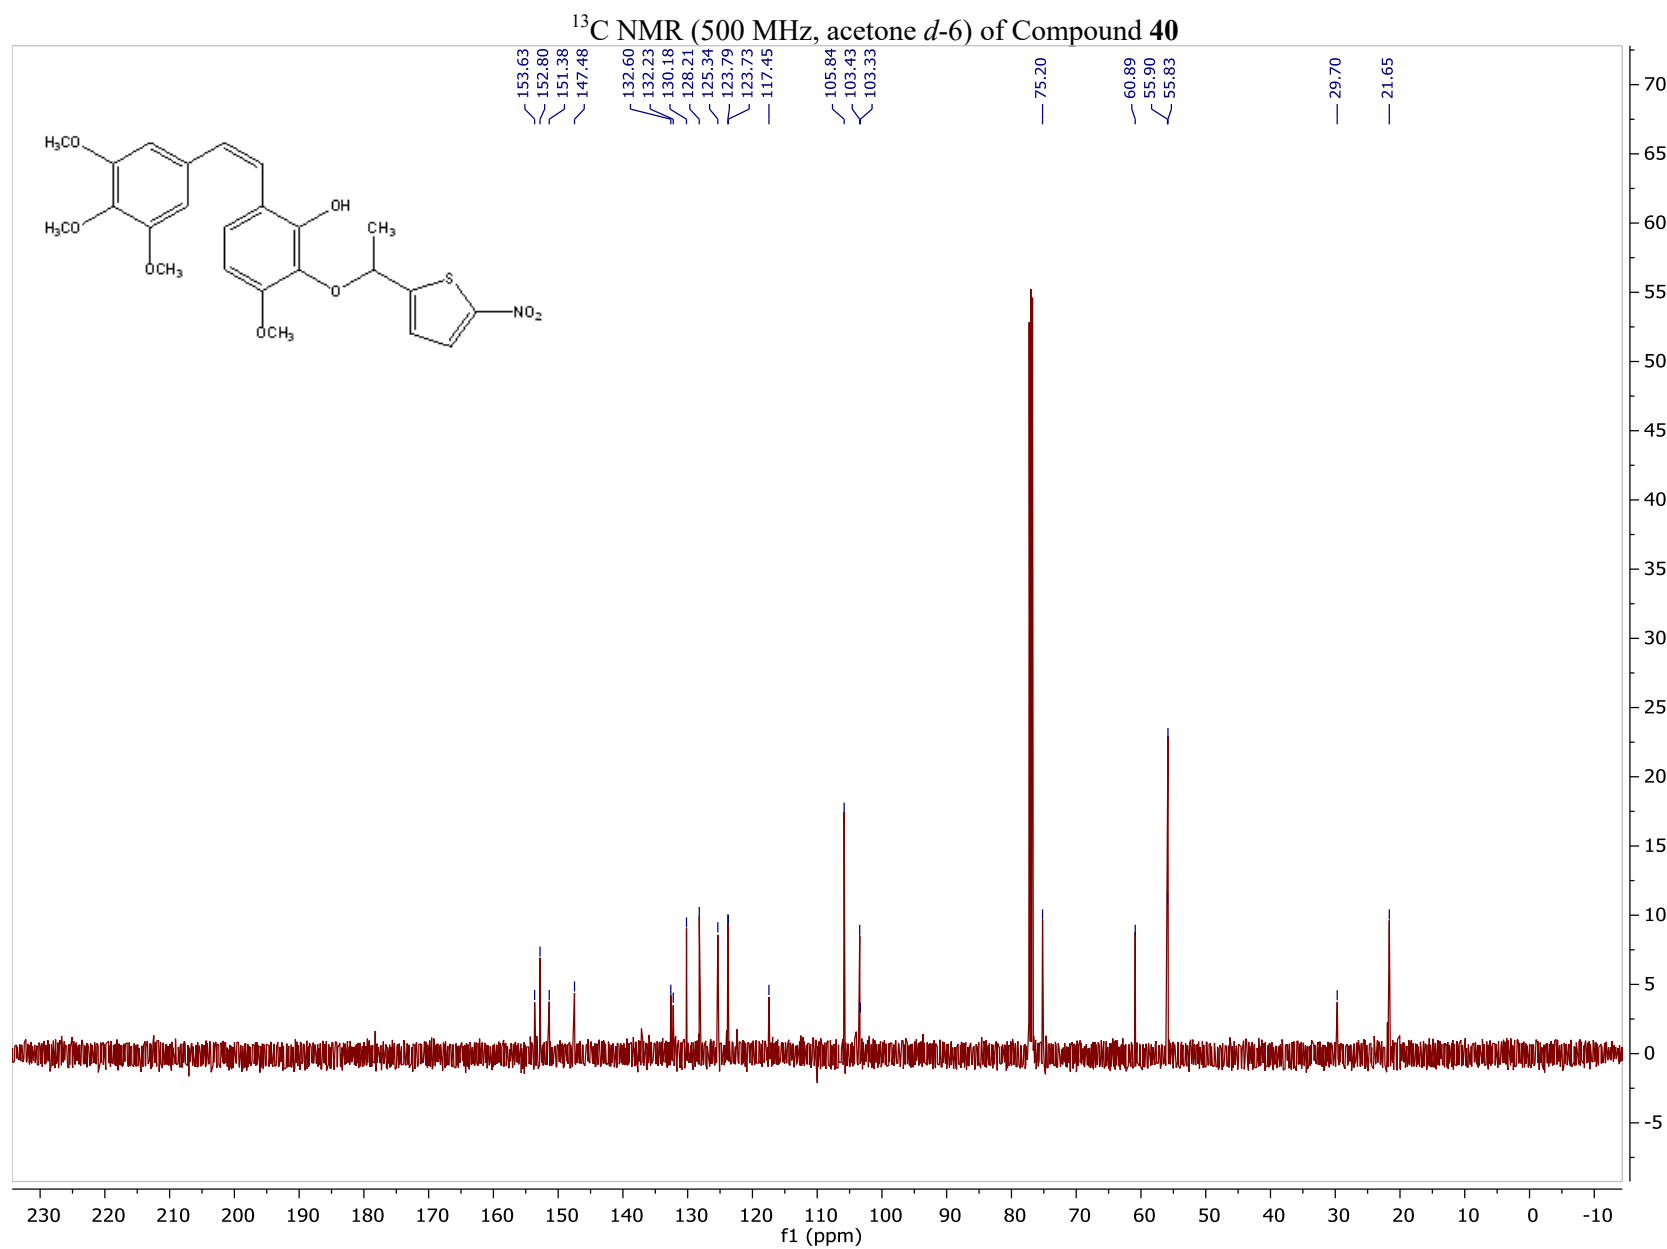

S143

# HPLC Trace of Compound 40

Data File C:\Chem32\1\Data\Blake\CA1MONOMINOR006.D  
Sample Name: CA1MonoMinorIsomer

```
=====
Acq. Operator   : BLAKE
Acq. Instrument : Instrument 1           Location :   -
Injection Date  : 5/11/2016 3:35:08 PM
Acq. Method     : C:\CHEM32\1\METHODS\GRAD 2 50-90 ACN.M
Last changed    : 5/11/2016 3:29:22 PM by BLAKE
Analysis Method : C:\CHEM32\1\METHODS\RT-ACNWASH 2.M
Last changed    : 7/9/2015 2:27:22 PM by Blake
Method Info     : General Column Wash Method
```

Sample Info : Purest Frac

Additional Info : Peak(s) manually integrated

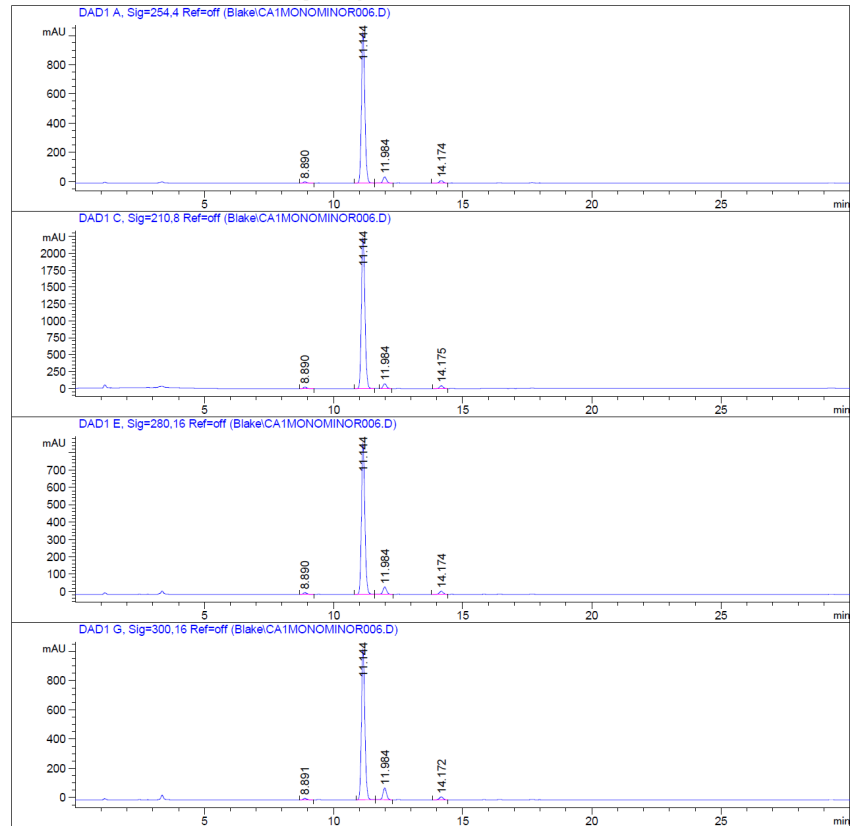

Data File C:\Chem32\1\Data\Blake\CA1MONOMINOR006.D  
Sample Name: CA1MonoMinorIsomer

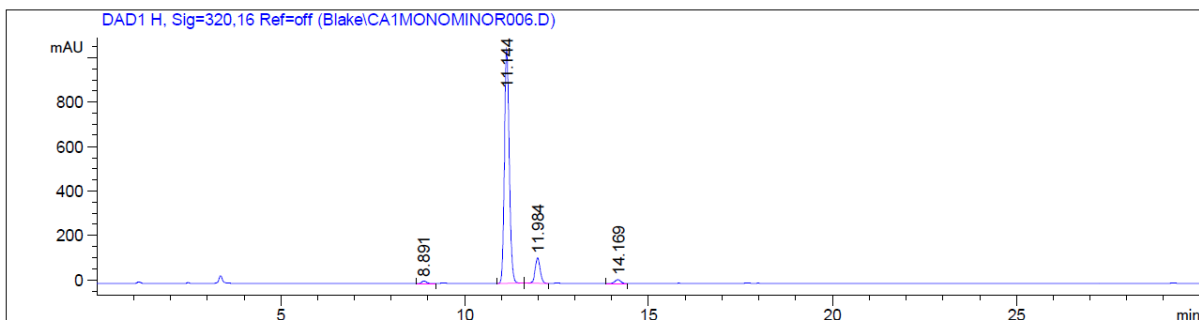

=====  
Area Percent Report  
=====

Sorted By : Signal  
Multiplier : 1.0000  
Dilution : 1.0000  
Use Multiplier & Dilution Factor with ISTDs

Signal 1: DAD1 A, Sig=254,4 Ref=off

| Peak # | RetTime [min] | Type | Width [min] | Area [mAU*s] | Height [mAU] | Area %  |
|--------|---------------|------|-------------|--------------|--------------|---------|
| 1      | 8.890         | BB   | 0.1415      | 98.29693     | 10.66364     | 0.9651  |
| 2      | 11.144        | BV   | 0.1412      | 9471.36328   | 1031.05286   | 92.9948 |
| 3      | 11.984        | VB   | 0.1531      | 435.87039    | 43.43245     | 4.2796  |
| 4      | 14.174        | BV   | 0.1531      | 179.30080    | 17.85905     | 1.7605  |

Totals : 1.01848e4 1103.00799

Signal 2: DAD1 C, Sig=210,8 Ref=off

| Peak # | RetTime [min] | Type | Width [min] | Area [mAU*s] | Height [mAU] | Area %  |
|--------|---------------|------|-------------|--------------|--------------|---------|
| 1      | 8.890         | BB   | 0.1418      | 248.90137    | 26.94793     | 1.0891  |
| 2      | 11.144        | BV   | 0.1507      | 2.14740e4    | 2223.11255   | 93.9608 |
| 3      | 11.984        | VB   | 0.1474      | 705.34277    | 73.89548     | 3.0863  |
| 4      | 14.175        | BV   | 0.1507      | 425.95596    | 43.32686     | 1.8638  |

Totals : 2.28542e4 2367.28281

Signal 3: DAD1 E, Sig=280,16 Ref=off

Data File C:\Chem32\1\Data\Blake\CA1MONOMINOR006.D  
Sample Name: CA1MonoMinorIsomer

| Peak # | RetTime [min] | Type | Width [min] | Area [mAU*s] | Height [mAU] | Area %  |
|--------|---------------|------|-------------|--------------|--------------|---------|
| 1      | 8.890         | BB   | 0.1418      | 87.92610     | 9.51514      | 1.0175  |
| 2      | 11.144        | BV   | 0.1410      | 7950.11084   | 866.50201    | 91.9969 |
| 3      | 11.984        | VB   | 0.1518      | 424.61340    | 42.77497     | 4.9135  |
| 4      | 14.174        | BV   | 0.1530      | 179.06296    | 17.85389     | 2.0721  |

Totals : 8641.71330 936.64601

Signal 4: DAD1 G, Sig=300,16 Ref=off

| Peak # | RetTime [min] | Type | Width [min] | Area [mAU*s] | Height [mAU] | Area %  |
|--------|---------------|------|-------------|--------------|--------------|---------|
| 1      | 8.891         | BB   | 0.1416      | 101.99403    | 11.06105     | 0.9697  |
| 2      | 11.144        | BB   | 0.1410      | 9427.53125   | 1028.07629   | 89.6329 |
| 3      | 11.984        | BB   | 0.1464      | 772.94672    | 81.67284     | 7.3488  |
| 4      | 14.172        | BV   | 0.1590      | 215.45932    | 20.77102     | 2.0485  |

Totals : 1.05179e4 1141.58120

Signal 5: DAD1 H, Sig=320,16 Ref=off

| Peak # | RetTime [min] | Type | Width [min] | Area [mAU*s] | Height [mAU] | Area %  |
|--------|---------------|------|-------------|--------------|--------------|---------|
| 1      | 8.891         | BB   | 0.1415      | 108.28686    | 11.75676     | 0.9815  |
| 2      | 11.144        | BB   | 0.1411      | 9654.57617   | 1051.61963   | 87.5111 |
| 3      | 11.984        | BB   | 0.1464      | 1080.27380   | 114.20609    | 9.7918  |
| 4      | 14.169        | BV   | 0.1644      | 189.26395    | 17.46828     | 1.7155  |

Totals : 1.10324e4 1195.05076

=====  
\*\*\* End of Report \*\*\*

# Mass Spectrum of Compound 40

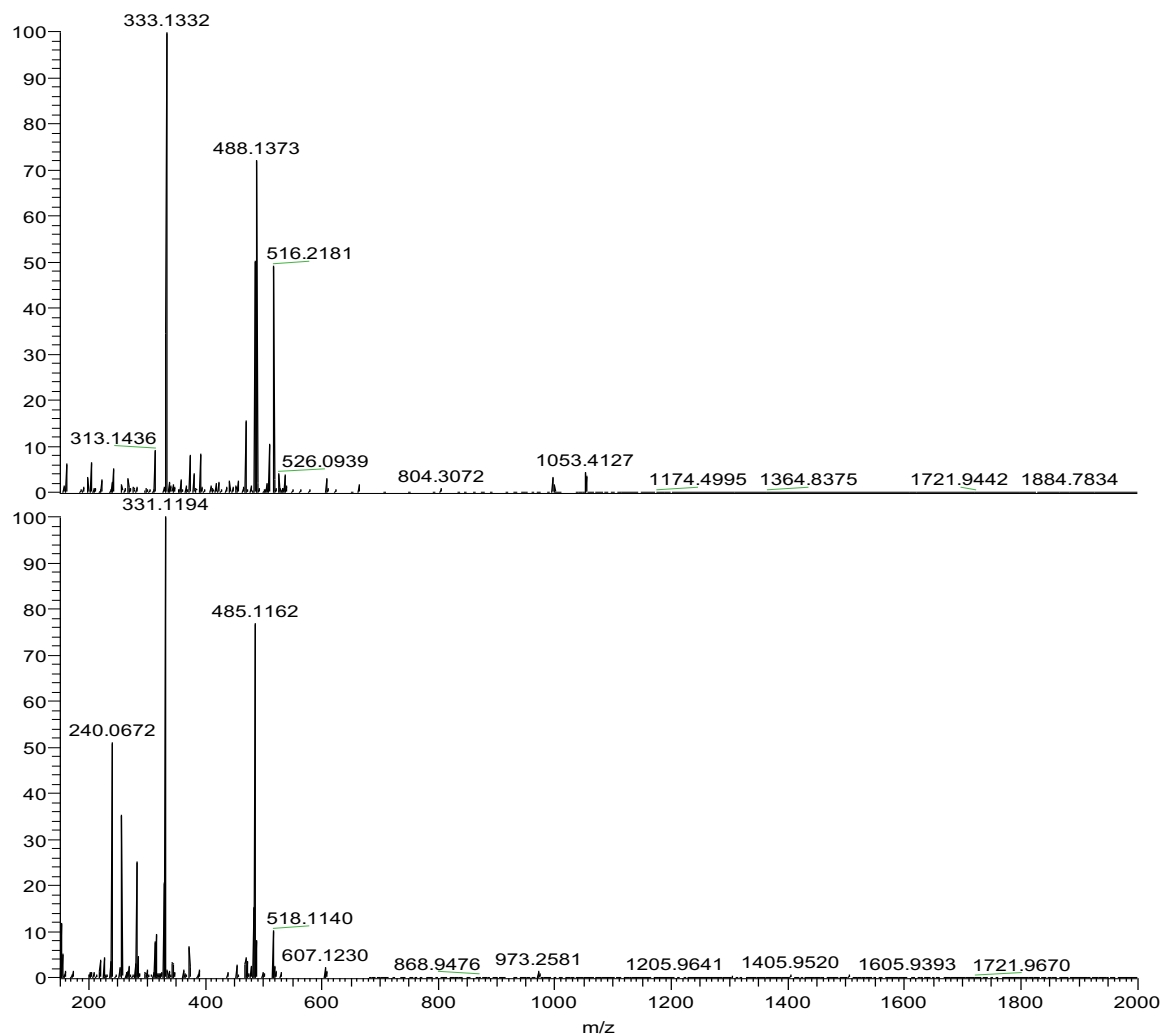

NL: 3.49E6  
Mono Minor CA1#1  
RT: 0.01 AV: 1 T:  
FTMS + p APCI corona  
pi Full ms  
[150.00-2000.00]

NL: 2.17E6  
mono minor ca1 neg#1  
RT: 0.01 AV: 1 T:  
FTMS - p APCI corona  
pi Full ms  
[150.00-2000.00]

<sup>1</sup>H NMR (600 MHz, CDCl<sub>3</sub>) for Compound **41**

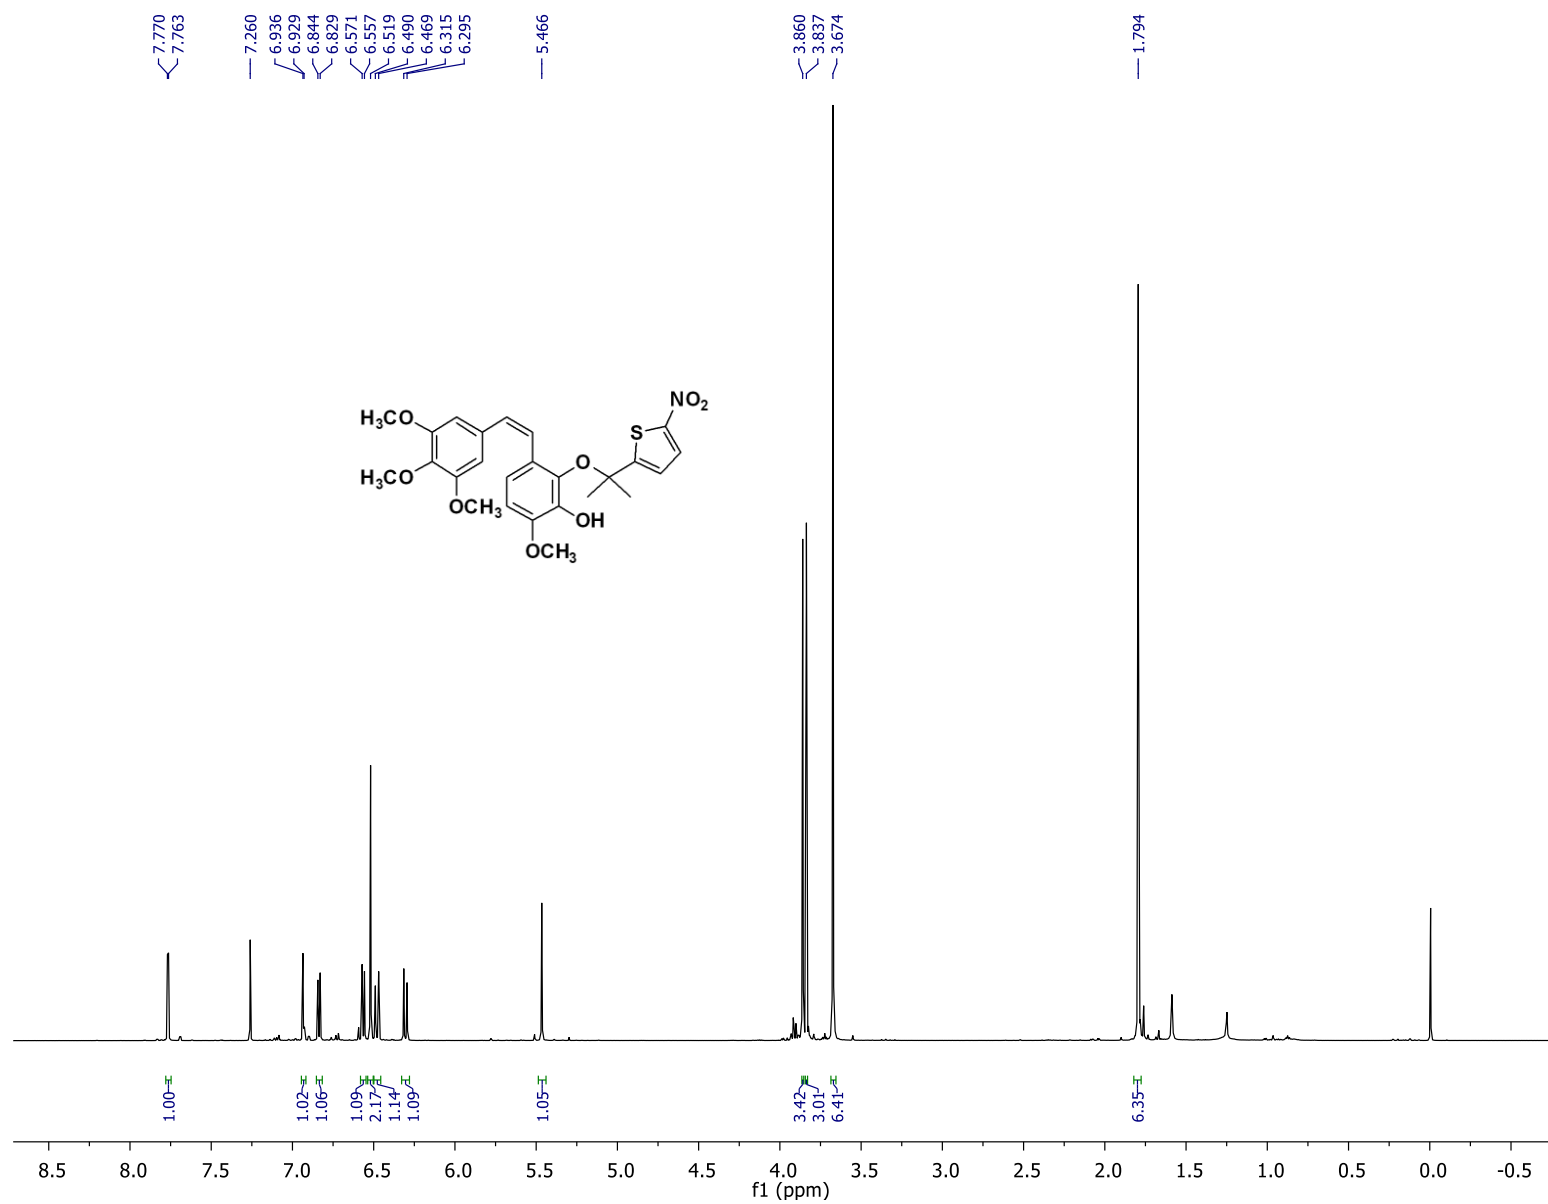

<sup>13</sup>C NMR (151 MHz, CDCl<sub>3</sub>) for Compound **41**

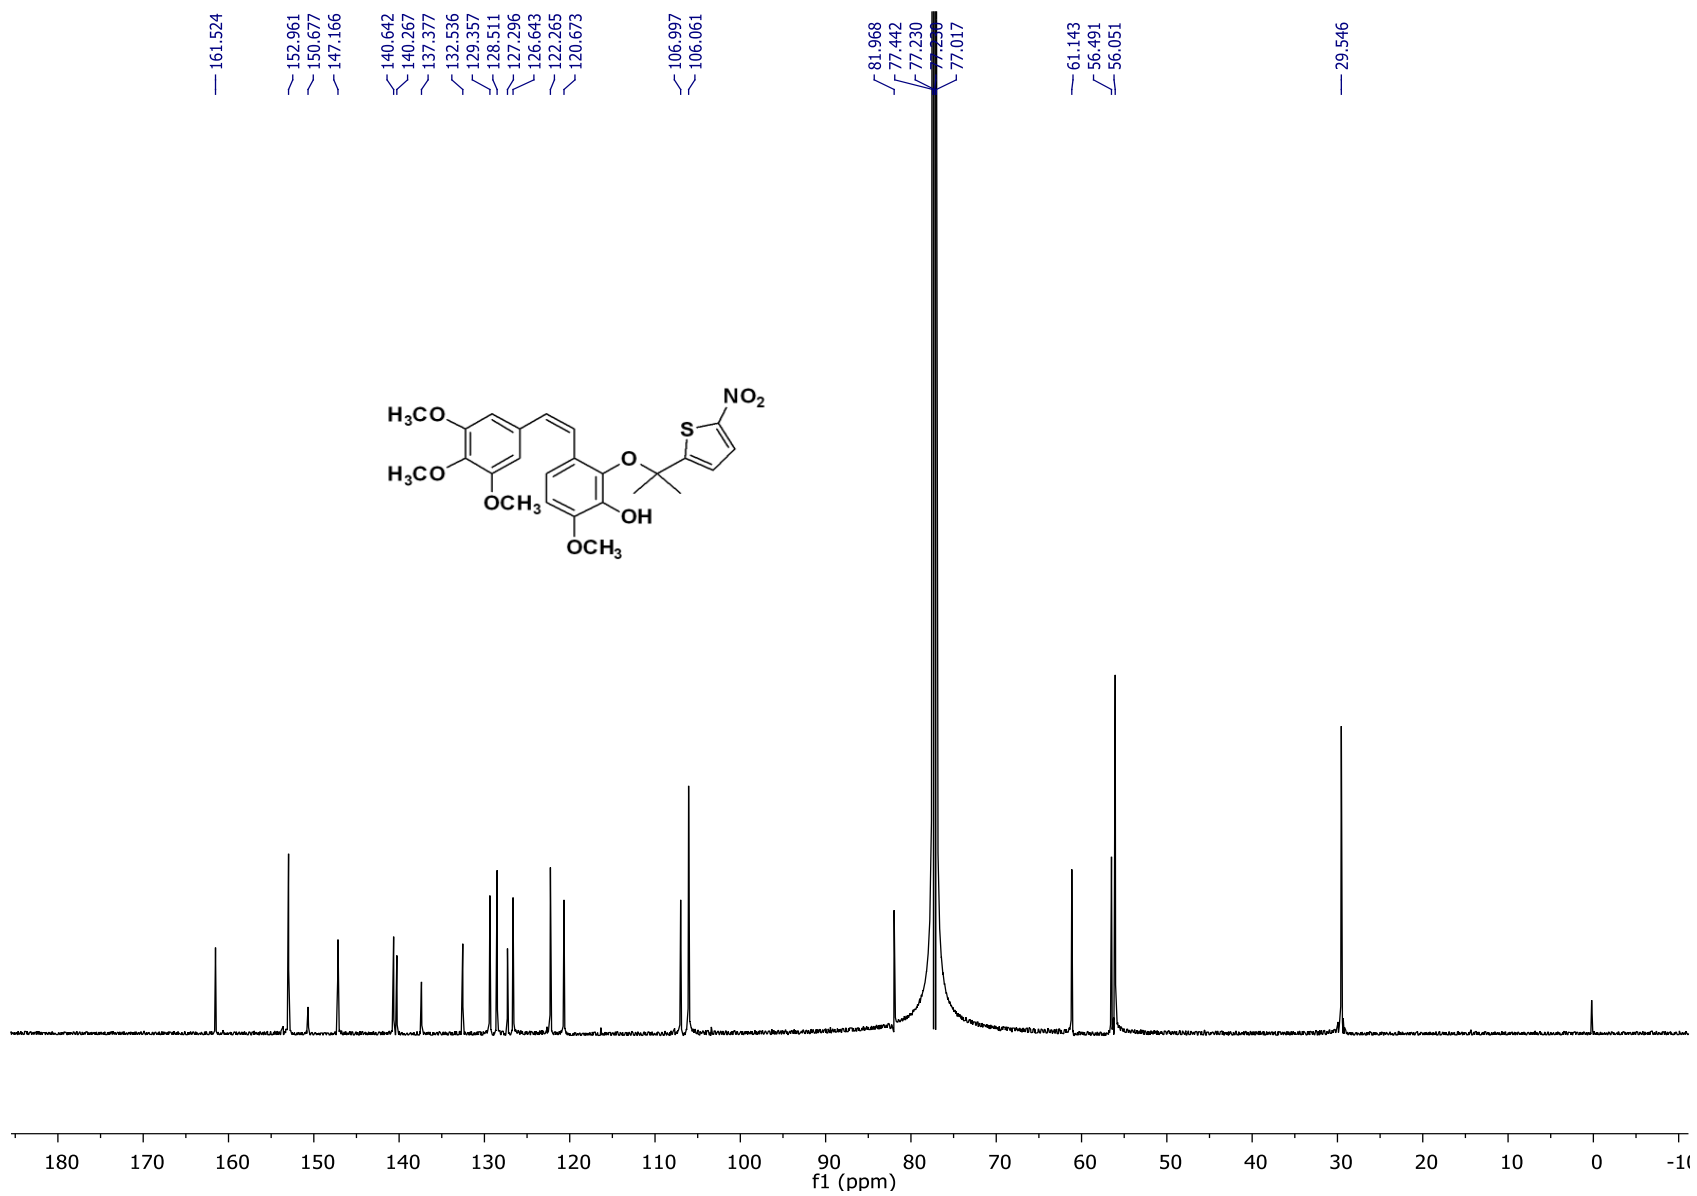

## HPLC Traces for Compound 41

Data File C:\CHEM32\1\DATA\LAXMAN\BK-I-89BOTTOM03.D

Sample Name: BK-I-89bottom-rerun3

```
=====
Acq. Operator   : Laxman
Acq. Instrument : Instrument 1          Location : -
Injection Date  : 7/10/2015 11:55:32 AM
Acq. Method     : C:\CHEM32\1\METHODS\GRAD 2 50-90 ACN.M
Last changed    : 7/10/2015 10:49:26 AM by Laxman
Analysis Method : C:\CHEM32\1\DATA\LAXMAN\BK-I-89BOTTOM03.D\DA.M (GRAD 2 50-90 ACN.M)
Last changed    : 7/10/2015 12:41:23 PM by Laxman
Sample Info     : Method-Grad2 50-90% ACN
```

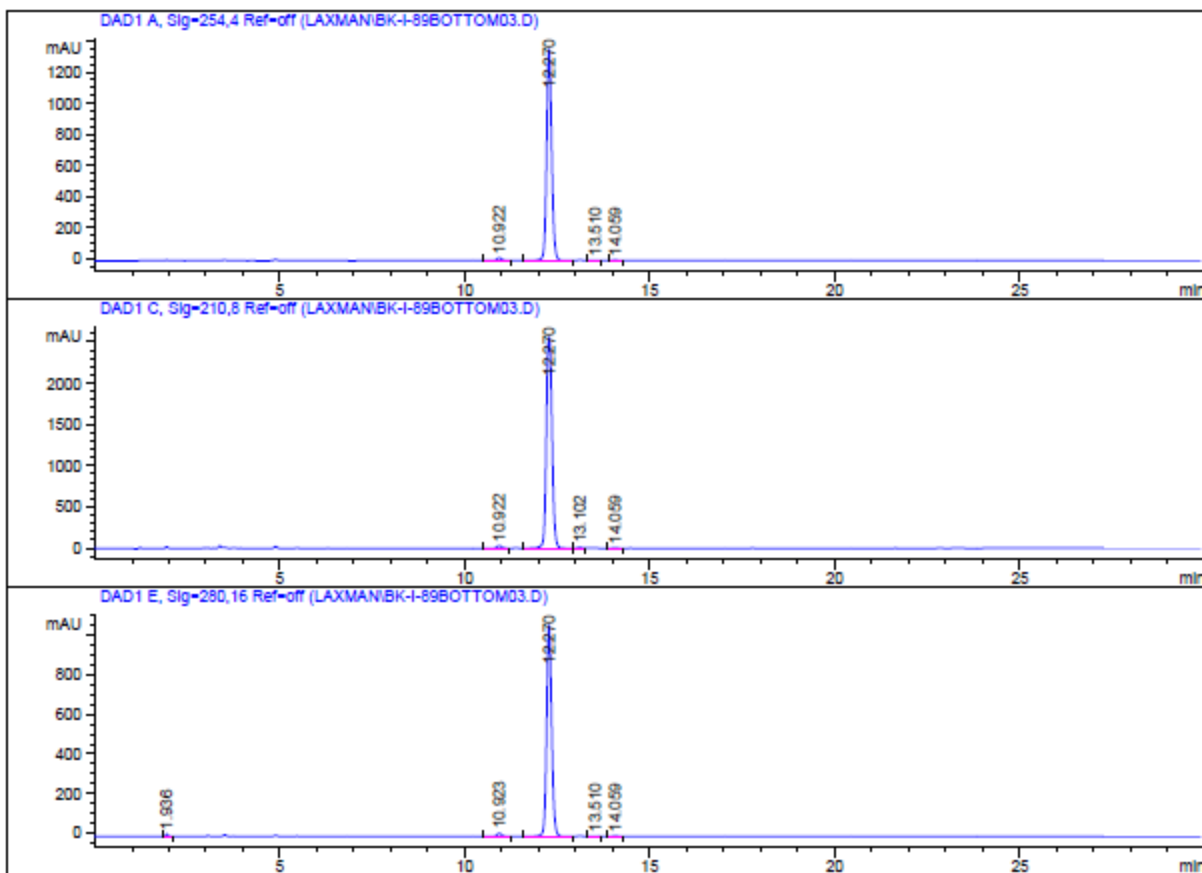

Data File C:\CHEM32\1\DATA\LAXMAN\BK-I-89BOTTOM03.D  
Sample Name: BK-I-89bottom-rerun3

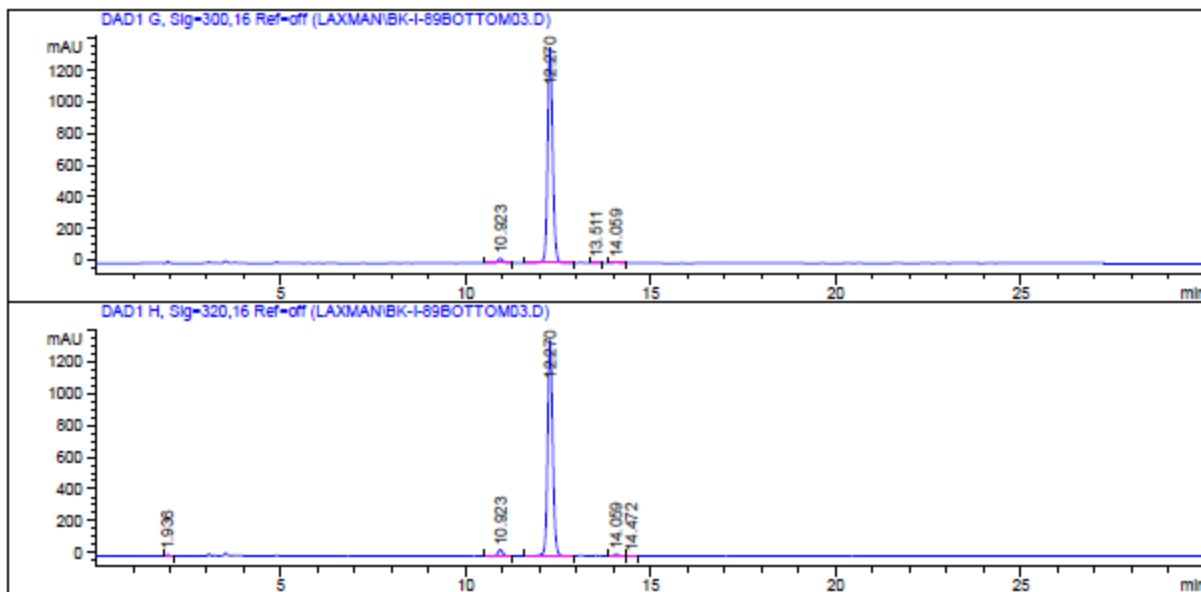

=====  
Area Percent Report  
=====

Sorted By : Signal  
Multiplier : 1.0000  
Dilution : 1.0000  
Use Multiplier & Dilution Factor with ISTDs

Signal 1: DAD1 A, Sig=254,4 Ref=off

| Peak # | RetTime [min] | Type | Width [min] | Area [mAU*s] | Height [mAU] | Area %  |
|--------|---------------|------|-------------|--------------|--------------|---------|
| 1      | 10.922        | BV   | 0.1421      | 168.96503    | 18.23570     | 1.2853  |
| 2      | 12.270        | BB   | 0.1469      | 1.29245e4    | 1359.97986   | 98.3160 |
| 3      | 13.510        | BB   | 0.1399      | 17.83705     | 1.96581      | 0.1357  |
| 4      | 14.059        | BB   | 0.1396      | 34.57308     | 3.82064      | 0.2630  |

Totals : 1.31458e4 1384.00200

Signal 2: DAD1 C, Sig=210,8 Ref=off

Data File C:\CHEM32\1\DATA\LAXMAN\BK-I-89BOTTOM03.D  
Sample Name: BK-I-89bottom-rerun3

| Peak # | RetTime [min] | Type | Width [min] | Area [mAU*s] | Height [mAU] | Area %  |
|--------|---------------|------|-------------|--------------|--------------|---------|
| 1      | 10.922        | BV   | 0.1429      | 300.59656    | 32.20519     | 1.0795  |
| 2      | 12.270        | BB   | 0.1691      | 2.73845e4    | 2553.27441   | 98.3416 |
| 3      | 13.102        | BV   | 0.1368      | 101.43078    | 11.51260     | 0.3643  |
| 4      | 14.059        | BB   | 0.1415      | 59.76510     | 6.60854      | 0.2146  |

Totals : 2.78463e4 2603.60075

Signal 3: DAD1 E, Sig=280,16 Ref=off

| Peak # | RetTime [min] | Type | Width [min] | Area [mAU*s] | Height [mAU] | Area %  |
|--------|---------------|------|-------------|--------------|--------------|---------|
| 1      | 1.936         | BB   | 0.0606      | 53.48746     | 13.38945     | 0.5150  |
| 2      | 10.923        | BV   | 0.1396      | 146.41867    | 15.88057     | 1.4099  |
| 3      | 12.270        | BB   | 0.1466      | 1.01396e4    | 1069.87317   | 97.6365 |
| 4      | 13.510        | BB   | 0.1376      | 13.06543     | 1.47166      | 0.1258  |
| 5      | 14.059        | BB   | 0.1398      | 32.48272     | 3.58338      | 0.3128  |

Totals : 1.03851e4 1104.19823

Signal 4: DAD1 G, Sig=300,16 Ref=off

| Peak # | RetTime [min] | Type | Width [min] | Area [mAU*s] | Height [mAU] | Area %  |
|--------|---------------|------|-------------|--------------|--------------|---------|
| 1      | 10.923        | BV   | 0.1389      | 280.53387    | 30.61063     | 2.0978  |
| 2      | 12.270        | BV   | 0.1470      | 1.30084e4    | 1367.02710   | 97.2770 |
| 3      | 13.511        | BB   | 0.1406      | 20.27245     | 2.26112      | 0.1516  |
| 4      | 14.059        | BB   | 0.1405      | 63.33008     | 6.93787      | 0.4736  |

Totals : 1.33726e4 1406.83672

Signal 5: DAD1 H, Sig=320,16 Ref=off

| Peak # | RetTime [min] | Type | Width [min] | Area [mAU*s] | Height [mAU] | Area %  |
|--------|---------------|------|-------------|--------------|--------------|---------|
| 1      | 1.936         | VB   | 0.0602      | 37.33607     | 9.43805      | 0.2777  |
| 2      | 10.923        | BV   | 0.1388      | 361.49524    | 39.48792     | 2.6884  |
| 3      | 12.270        | BV   | 0.1471      | 1.29486e4    | 1359.96545   | 96.2983 |
| 4      | 14.059        | BB   | 0.1407      | 90.02934     | 9.84660      | 0.6695  |
| 5      | 14.472        | BB   | 0.1373      | 8.87988      | 1.02271      | 0.0660  |

Totals : 1.34464e4 1419.76074

Data File C:\CHEM32\1\DATA\LAXMAN\BK-I-89BOTTOM03.D  
Sample Name: BK-I-89bottom-rerun3

=====  
\*\*\* End of Report \*\*\*

# Mass Spectrum for Compound 41

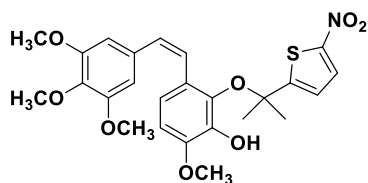

Chemical Formula:  $C_{25}H_{27}NO_8S$

Exact Mass: 501.1457

Molecular Weight: 501.5500

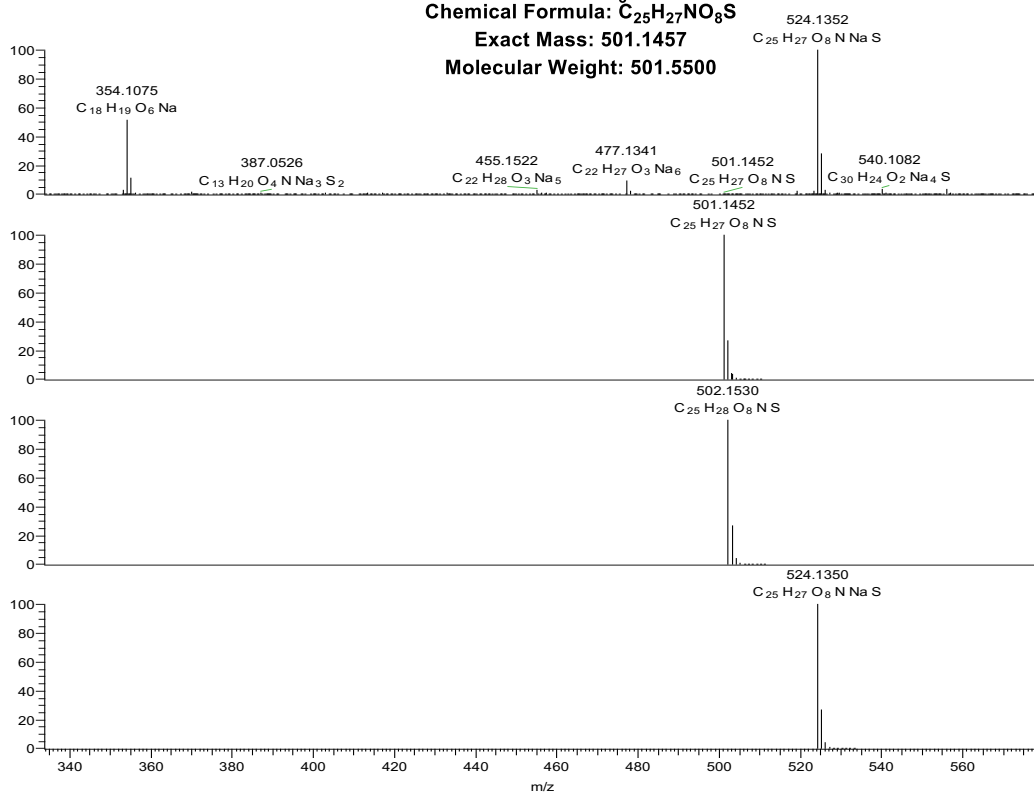

NL:  
7.49E6  
BW-5-27-Gem2-  
product\_Orbi+ES#1-9  
RT: 0.01-0.09 AV: 9 T:  
FTMS + c ESI Full ms  
[200.00-1000.00]

NL:  
7.07E5  
 $C_{25}H_{27}NO_8S$ :  
 $C_{25}H_{27}N_1O_8S_1$   
pa Chrg 1

NL:  
7.07E5  
 $C_{25}H_{27}NO_8S + H$ :  
 $C_{25}H_{28}N_1O_8S_1$   
pa Chrg 1

NL:  
7.07E5  
 $C_{25}H_{27}NO_8S + Na$ :  
 $C_{25}H_{27}N_1O_8S_1Na_1$   
pa Chrg 1

<sup>1</sup>H NMR (500 MHz, CDCl<sub>3</sub>) of Compound **43**

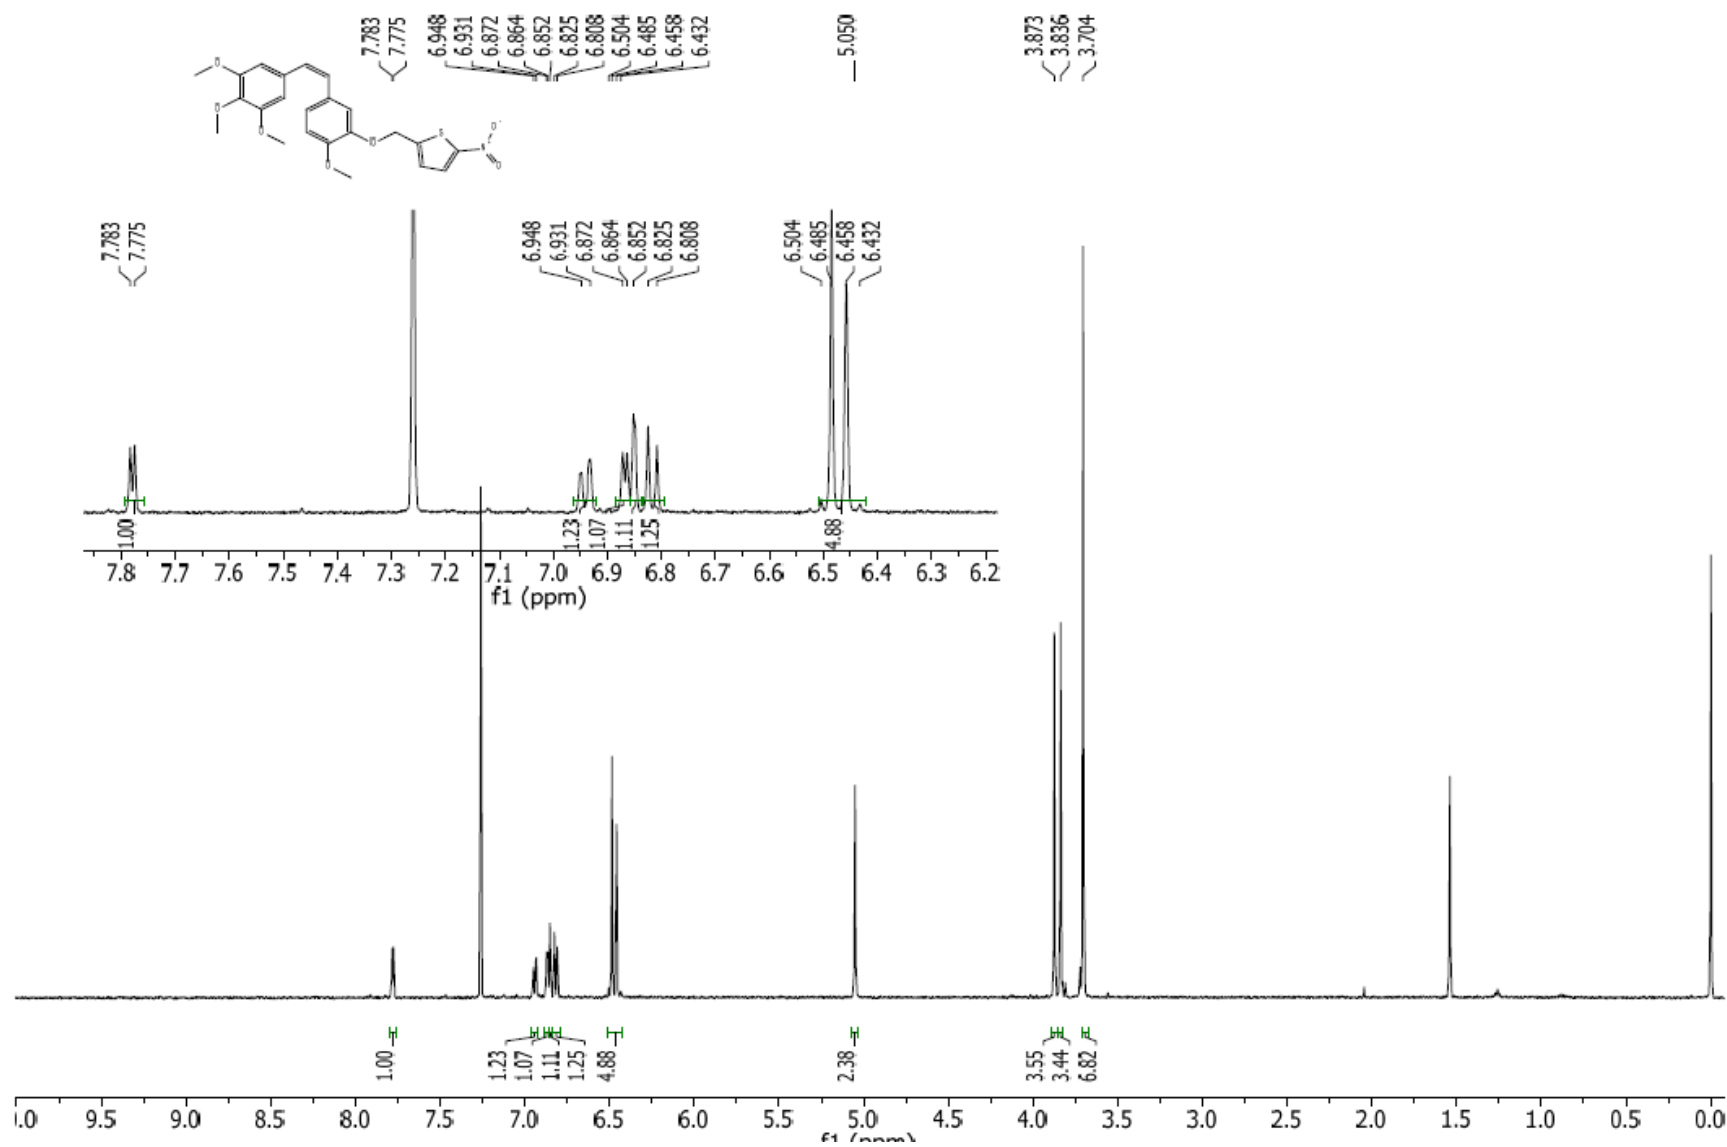

$^{13}\text{C}$  NMR (500 MHz,  $\text{CDCl}_3$ ) of Compound **43**

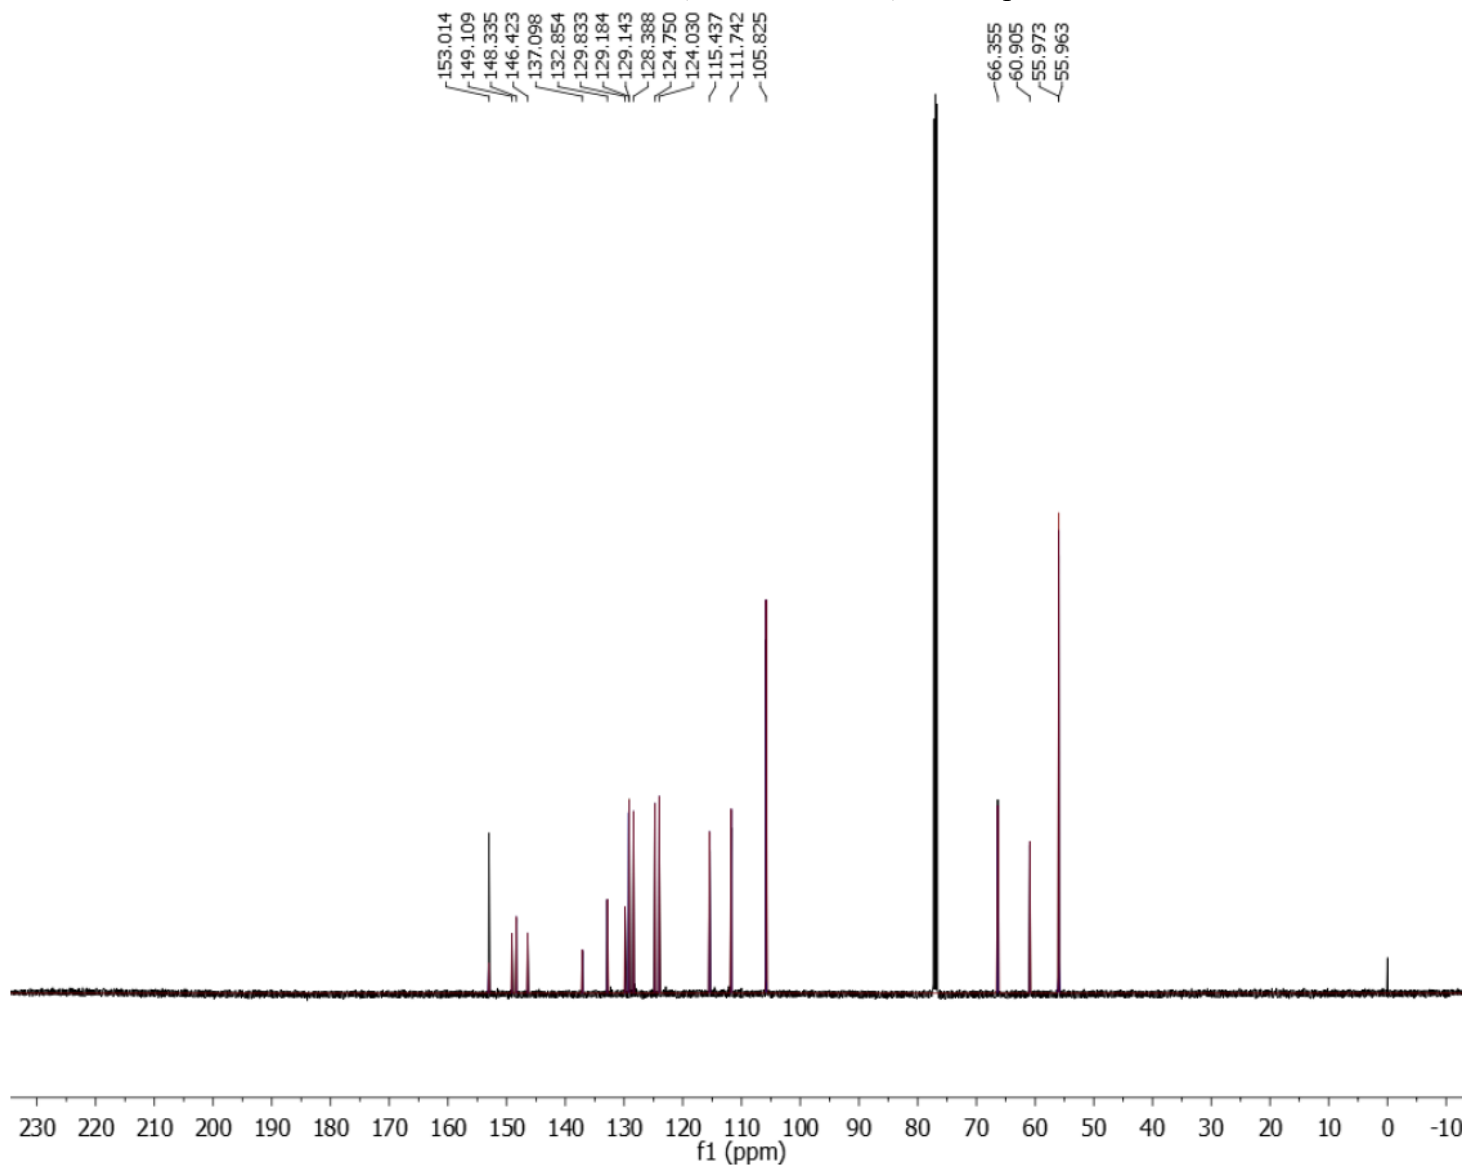

## HPLC Trace of Compound 43

Data File C:\CHEM32\1\DATA\LAXMAN\II-135-Y-RUN1.D

Sample Name: LD-II-135-Y- Blank1

```
=====
Acq. Operator   : Laxman
Acq. Instrument : Instrument 1           Location :   -
Injection Date  : 11/14/2012 12:51:23 PM
Acq. Method     : C:\CHEM32\1\METHODS\MASTERMETHOD.M
Last changed    : 11/14/2012 12:27:15 PM by Laxman
Analysis Method : C:\CHEM32\1\DATA\LAXMAN\II-135-Y-RUN1.D\DA.M (MASTERMETHOD.M)
Last changed    : 11/14/2012 1:41:39 PM by Laxman
Sample Info     :
                  10% ACN in Water
```

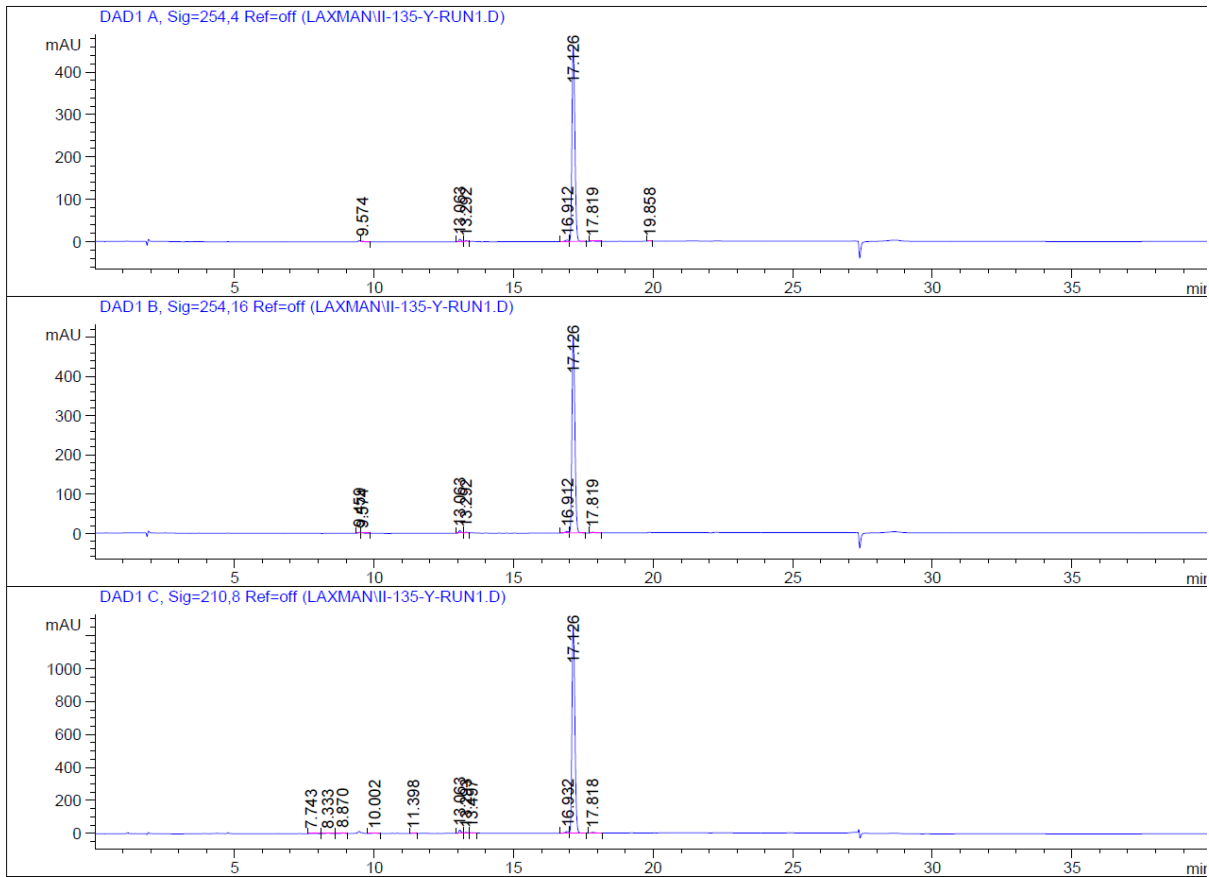

Data File C:\CHEM32\1\DATA\LAXMAN\II-135-Y-RUN1.D  
Sample Name: LD-II-135-Y- Blank1

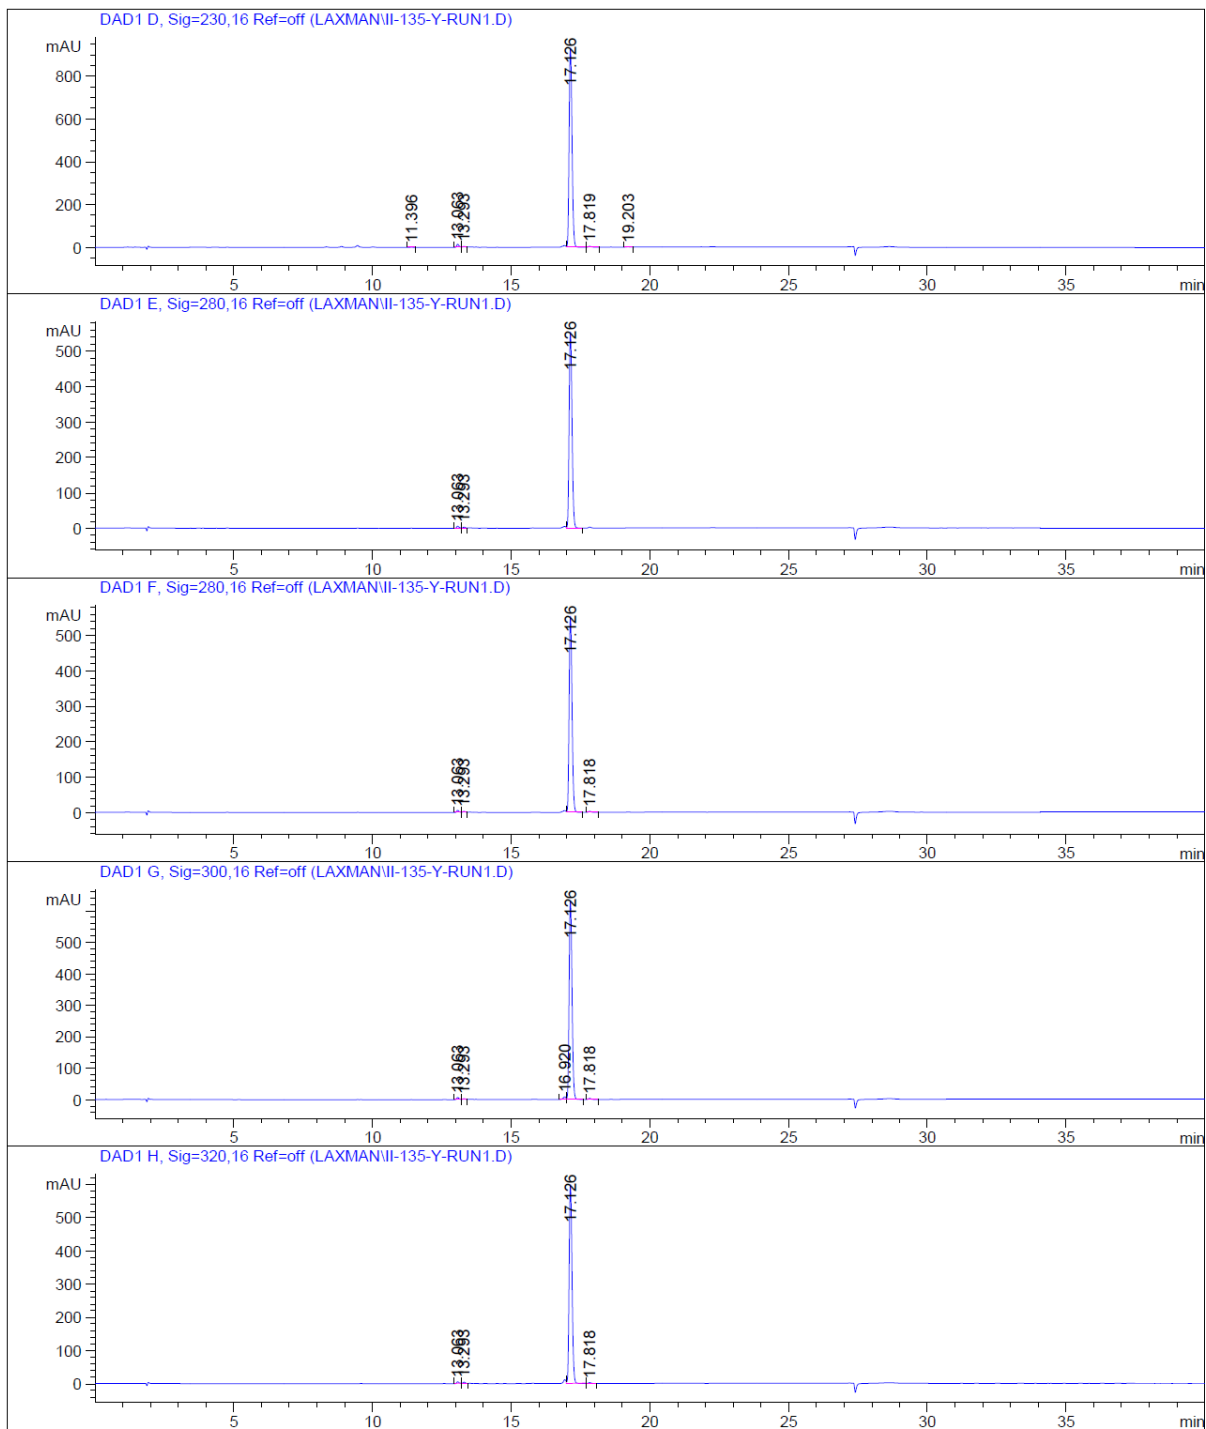

Data File C:\CHEM32\1\DATA\LAXMAN\II-135-Y-RUN1.D  
Sample Name: LD-II-135-Y- Blank1

=====  
Area Percent Report  
=====

Sorted By : Signal  
Multiplier : 1.0000  
Dilution : 1.0000  
Use Multiplier & Dilution Factor with ISTDs

Signal 1: DAD1 A, Sig=254,4 Ref=off

| Peak # | RetTime [min] | Type | Width [min] | Area [mAU*s] | Height [mAU] | Area %  |
|--------|---------------|------|-------------|--------------|--------------|---------|
| 1      | 9.574         | VB   | 0.0884      | 12.42534     | 2.05785      | 0.3582  |
| 2      | 13.063        | BV   | 0.0886      | 36.53085     | 6.21524      | 1.0531  |
| 3      | 13.292        | VB   | 0.0823      | 13.20063     | 2.39415      | 0.3805  |
| 4      | 16.912        | BV   | 0.1250      | 32.23994     | 3.79975      | 0.9294  |
| 5      | 17.126        | VB   | 0.1146      | 3354.70923   | 462.85483    | 96.7093 |
| 6      | 17.819        | BB   | 0.1066      | 13.03892     | 1.79827      | 0.3759  |
| 7      | 19.858        | BB   | 0.0861      | 6.71396      | 1.22175      | 0.1935  |

Totals : 3468.85887 480.34183

Signal 2: DAD1 B, Sig=254,16 Ref=off

| Peak # | RetTime [min] | Type | Width [min] | Area [mAU*s] | Height [mAU] | Area %  |
|--------|---------------|------|-------------|--------------|--------------|---------|
| 1      | 9.459         | BV   | 0.0768      | 14.51984     | 2.87982      | 0.3841  |
| 2      | 9.574         | VB   | 0.0887      | 10.97569     | 1.81098      | 0.2904  |
| 3      | 13.063        | BV   | 0.0884      | 39.76277     | 6.77752      | 1.0519  |
| 4      | 13.292        | VB   | 0.0819      | 13.63666     | 2.48918      | 0.3608  |
| 5      | 16.912        | BV   | 0.1249      | 35.15076     | 4.14536      | 0.9299  |
| 6      | 17.126        | VB   | 0.1145      | 3651.35840   | 503.87845    | 96.5989 |
| 7      | 17.819        | BB   | 0.1055      | 14.51247     | 2.02653      | 0.3839  |

Totals : 3779.91658 524.00784

Signal 3: DAD1 C, Sig=210,8 Ref=off

| Peak # | RetTime [min] | Type | Width [min] | Area [mAU*s] | Height [mAU] | Area % |
|--------|---------------|------|-------------|--------------|--------------|--------|
| 1      | 7.743         | BB   | 0.1630      | 14.03030     | 1.23105      | 0.1463 |
| 2      | 8.333         | BB   | 0.1290      | 35.60196     | 3.81120      | 0.3712 |
| 3      | 8.870         | BB   | 0.1127      | 31.62539     | 4.06788      | 0.3298 |
| 4      | 10.002        | BB   | 0.1266      | 20.58630     | 2.29664      | 0.2147 |

Data File C:\CHEM32\1\DATA\LAXMAN\II-135-Y-RUN1.D  
Sample Name: LD-II-135-Y- Blank1

| Peak # | RetTime [min] | Type | Width [min] | Area [mAU*s] | Height [mAU] | Area %  |
|--------|---------------|------|-------------|--------------|--------------|---------|
| 5      | 11.398        | BB   | 0.0819      | 8.22434      | 1.54954      | 0.0858  |
| 6      | 13.063        | BV   | 0.0929      | 118.07655    | 18.90557     | 1.2313  |
| 7      | 13.293        | VV   | 0.1031      | 44.22927     | 6.06295      | 0.4612  |
| 8      | 13.497        | VV   | 0.2122      | 41.45767     | 3.09574      | 0.4323  |
| 9      | 16.932        | BV   | 0.1304      | 92.42262     | 10.32446     | 0.9638  |
| 10     | 17.126        | VB   | 0.1167      | 9135.98730   | 1257.78174   | 95.2681 |
| 11     | 17.818        | BB   | 0.1249      | 47.52321     | 5.38835      | 0.4956  |

Totals : 9589.76493 1314.51514

Signal 4: DAD1 D, Sig=230,16 Ref=off

| Peak # | RetTime [min] | Type | Width [min] | Area [mAU*s] | Height [mAU] | Area %  |
|--------|---------------|------|-------------|--------------|--------------|---------|
| 1      | 11.396        | BB   | 0.0826      | 7.50027      | 1.39710      | 0.1082  |
| 2      | 13.063        | BV   | 0.0929      | 92.58957     | 14.82736     | 1.3352  |
| 3      | 13.293        | VV   | 0.1024      | 34.48166     | 4.76518      | 0.4973  |
| 4      | 17.126        | VB   | 0.1145      | 6759.72949   | 932.89081    | 97.4820 |
| 5      | 17.819        | BB   | 0.1088      | 31.06098     | 4.07915      | 0.4479  |
| 6      | 19.203        | BB   | 0.1156      | 8.97497      | 1.16906      | 0.1294  |

Totals : 6934.33694 959.12866

Signal 5: DAD1 E, Sig=280,16 Ref=off

| Peak # | RetTime [min] | Type | Width [min] | Area [mAU*s] | Height [mAU] | Area %  |
|--------|---------------|------|-------------|--------------|--------------|---------|
| 1      | 13.063        | BV   | 0.0883      | 35.15522     | 6.00424      | 0.8637  |
| 2      | 13.293        | VB   | 0.0801      | 15.65592     | 2.94128      | 0.3846  |
| 3      | 17.126        | VB   | 0.1145      | 4019.61060   | 554.99536    | 98.7517 |

Totals : 4070.42174 563.94088

Signal 6: DAD1 F, Sig=280,16 Ref=off

| Peak # | RetTime [min] | Type | Width [min] | Area [mAU*s] | Height [mAU] | Area %  |
|--------|---------------|------|-------------|--------------|--------------|---------|
| 1      | 13.063        | BV   | 0.0883      | 35.15522     | 6.00424      | 0.8596  |
| 2      | 13.293        | VB   | 0.0801      | 15.65592     | 2.94128      | 0.3828  |
| 3      | 17.126        | VB   | 0.1145      | 4019.61060   | 554.99536    | 98.2804 |
| 4      | 17.818        | BB   | 0.1008      | 19.51952     | 2.96627      | 0.4773  |

Data File C:\CHEM32\1\DATA\LAXMAN\II-135-Y-RUN1.D  
Sample Name: LD-II-135-Y- Blank1

| Peak #                                    | RetTime [min] | Type | Width [min] | Area [mAU*s] | Height [mAU] | Area % |
|-------------------------------------------|---------------|------|-------------|--------------|--------------|--------|
| ----- ----- ----- ----- ----- ----- ----- |               |      |             |              |              |        |
| Totals :                                  |               |      |             | 4089.94126   | 566.90715    |        |

Signal 7: DAD1 G, Sig=300,16 Ref=off

| Peak #                                    | RetTime [min] | Type | Width [min] | Area [mAU*s] | Height [mAU] | Area %  |
|-------------------------------------------|---------------|------|-------------|--------------|--------------|---------|
| ----- ----- ----- ----- ----- ----- ----- |               |      |             |              |              |         |
| 1                                         | 13.063        | BV   | 0.0884      | 38.27963     | 6.52826      | 0.8106  |
| 2                                         | 13.293        | VB   | 0.0803      | 11.99059     | 2.24650      | 0.2539  |
| 3                                         | 16.920        | BV   | 0.1100      | 61.49498     | 8.53992      | 1.3022  |
| 4                                         | 17.126        | VB   | 0.1146      | 4588.46826   | 633.00854    | 97.1655 |
| 5                                         | 17.818        | BB   | 0.0978      | 22.08729     | 3.49350      | 0.4677  |
| ----- ----- ----- ----- ----- ----- ----- |               |      |             |              |              |         |
| Totals :                                  |               |      |             | 4722.32075   | 653.81673    |         |

Signal 8: DAD1 H, Sig=320,16 Ref=off

| Peak #                                    | RetTime [min] | Type | Width [min] | Area [mAU*s] | Height [mAU] | Area %  |
|-------------------------------------------|---------------|------|-------------|--------------|--------------|---------|
| ----- ----- ----- ----- ----- ----- ----- |               |      |             |              |              |         |
| 1                                         | 13.063        | BV   | 0.0881      | 30.74878     | 5.26413      | 0.6958  |
| 2                                         | 13.293        | VB   | 0.0793      | 20.63757     | 3.92874      | 0.4670  |
| 3                                         | 17.126        | VB   | 0.1147      | 4350.68311   | 599.46283    | 98.4526 |
| 4                                         | 17.818        | BB   | 0.0972      | 16.99543     | 2.70743      | 0.3846  |
| ----- ----- ----- ----- ----- ----- ----- |               |      |             |              |              |         |
| Totals :                                  |               |      |             | 4419.06489   | 611.36313    |         |

=====  
\*\*\* End of Report \*\*\*

### Mass Spectrum of Compound 43

LD II 35 Y FS Qrb +ES#50 RT: 0.43 AV: 1 NL: 224E7

T: FTMS + p ESI Full ms [155.00-1000.00]

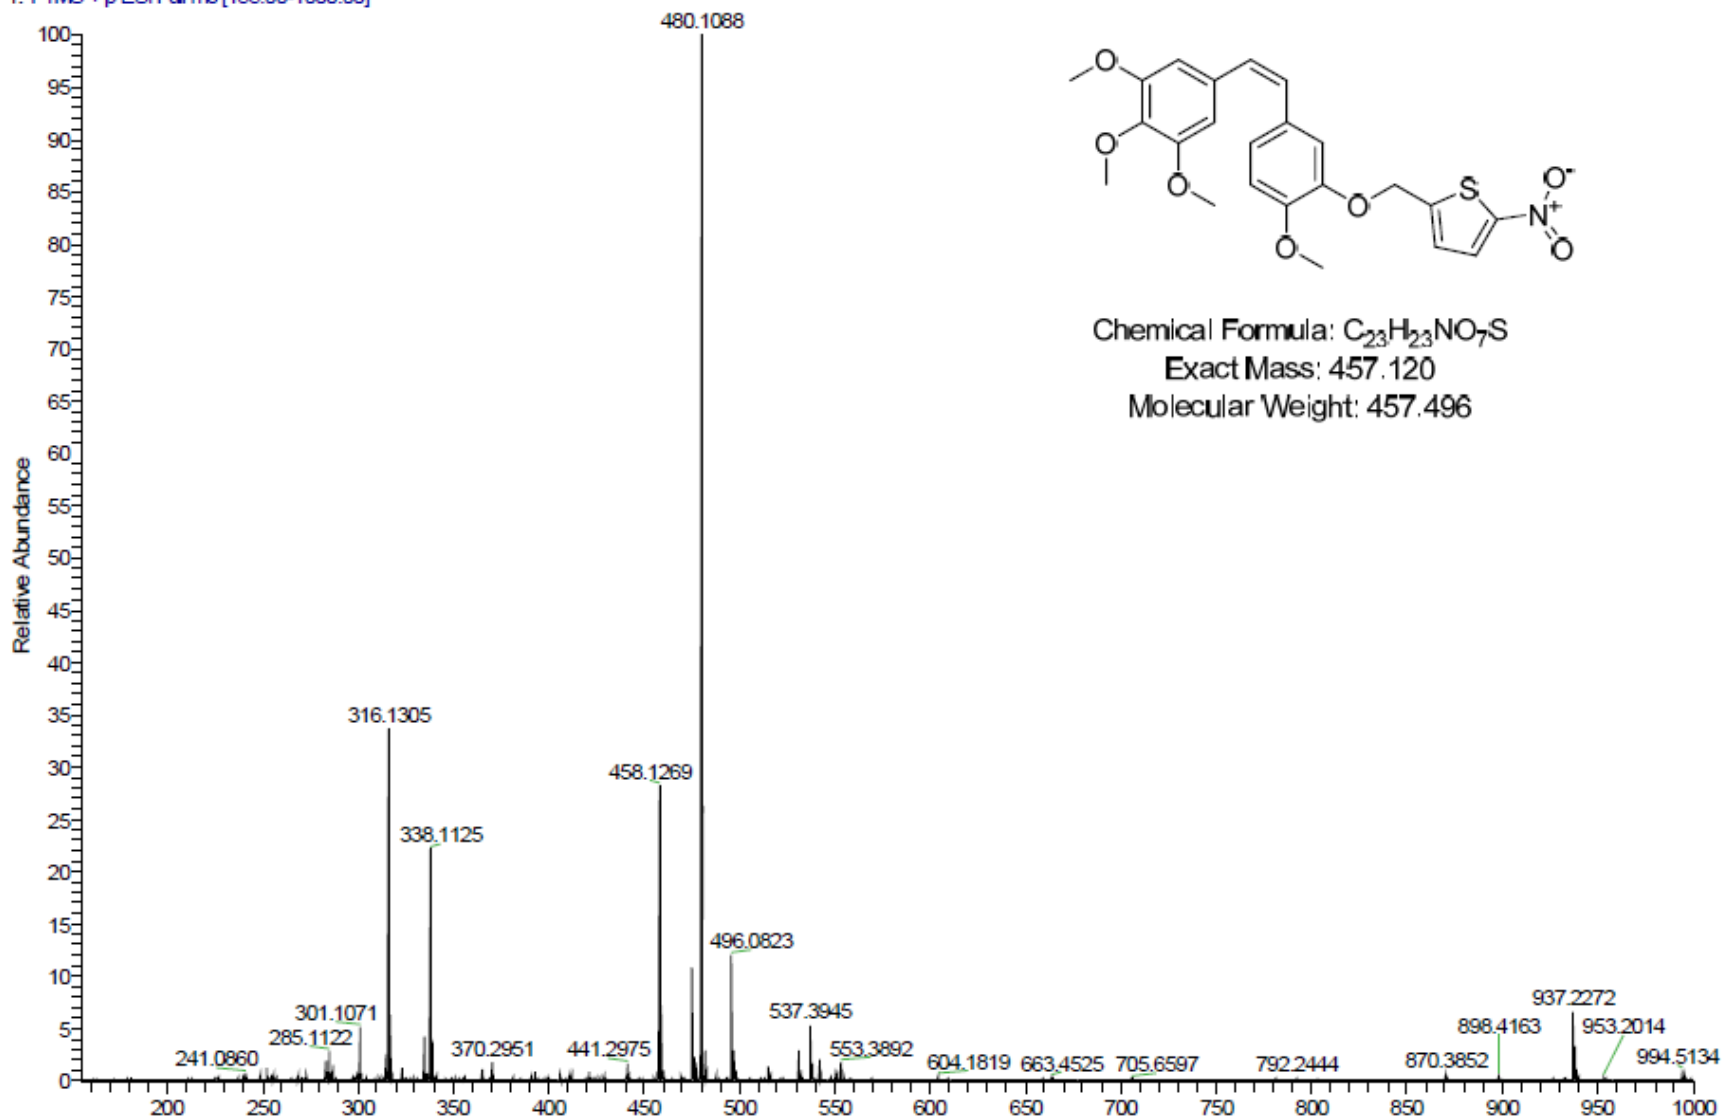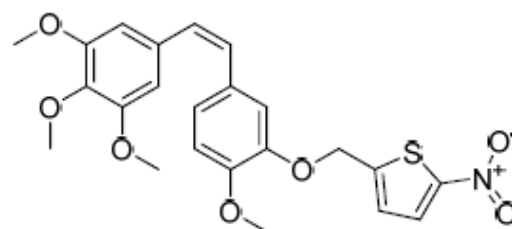

Chemical Formula:  $C_{23}H_{23}NO_7S$

Exact Mass: 457.120

Molecular Weight: 457.496

## S163

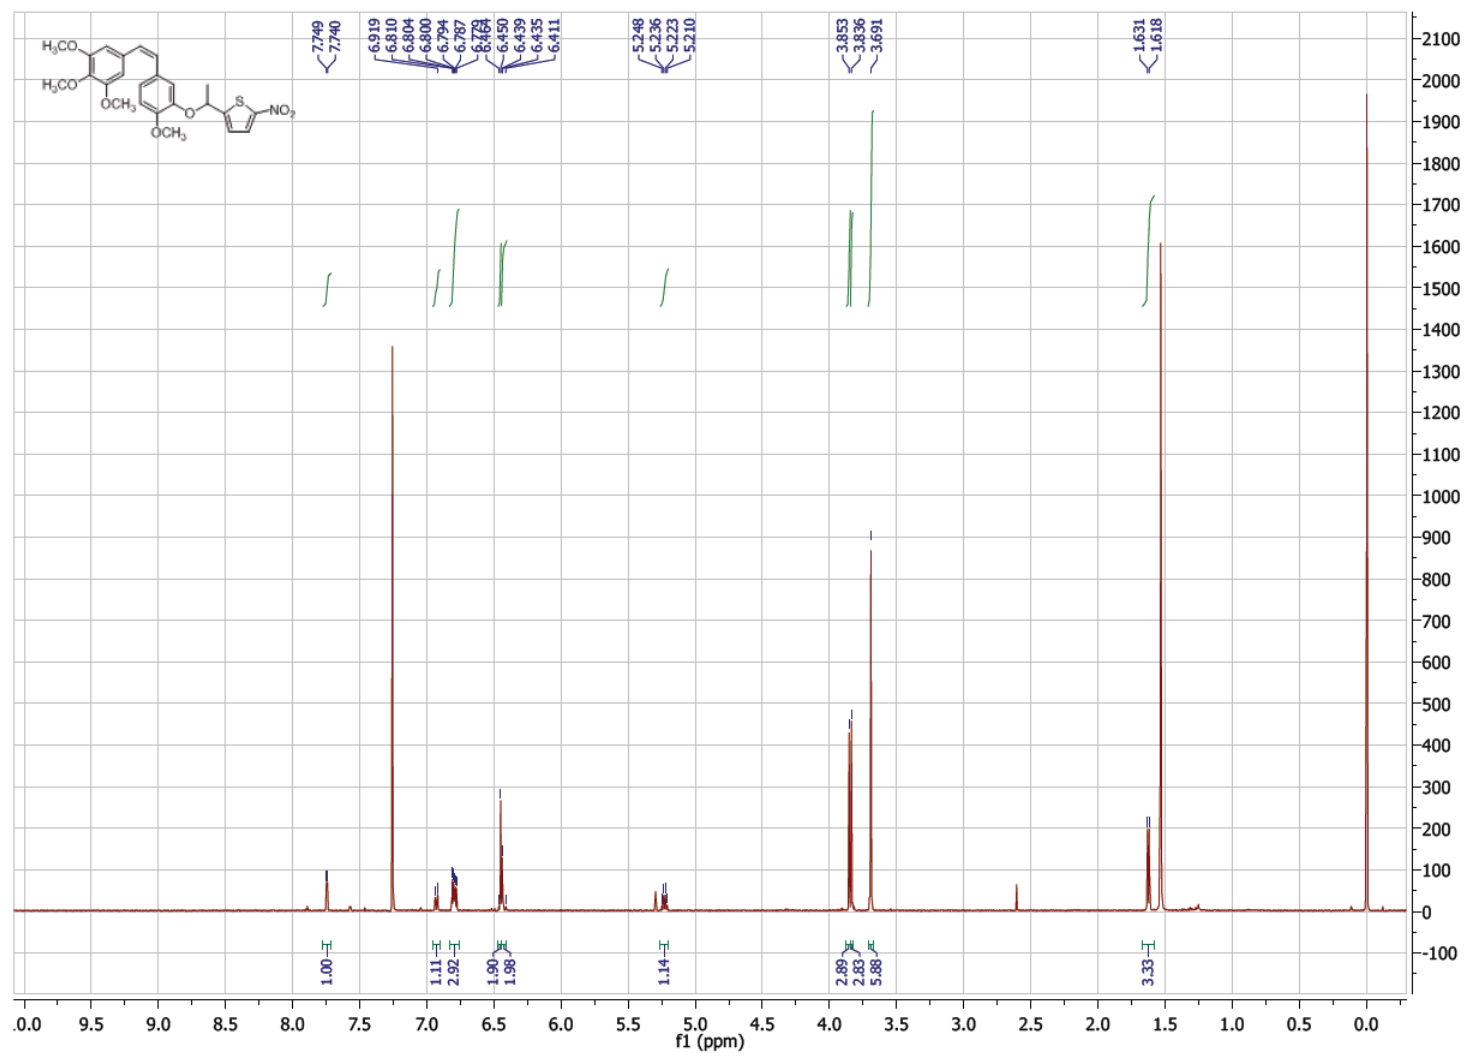

<sup>13</sup>C NMR (500 MHz, CDCl<sub>3</sub>) of Compound **44**

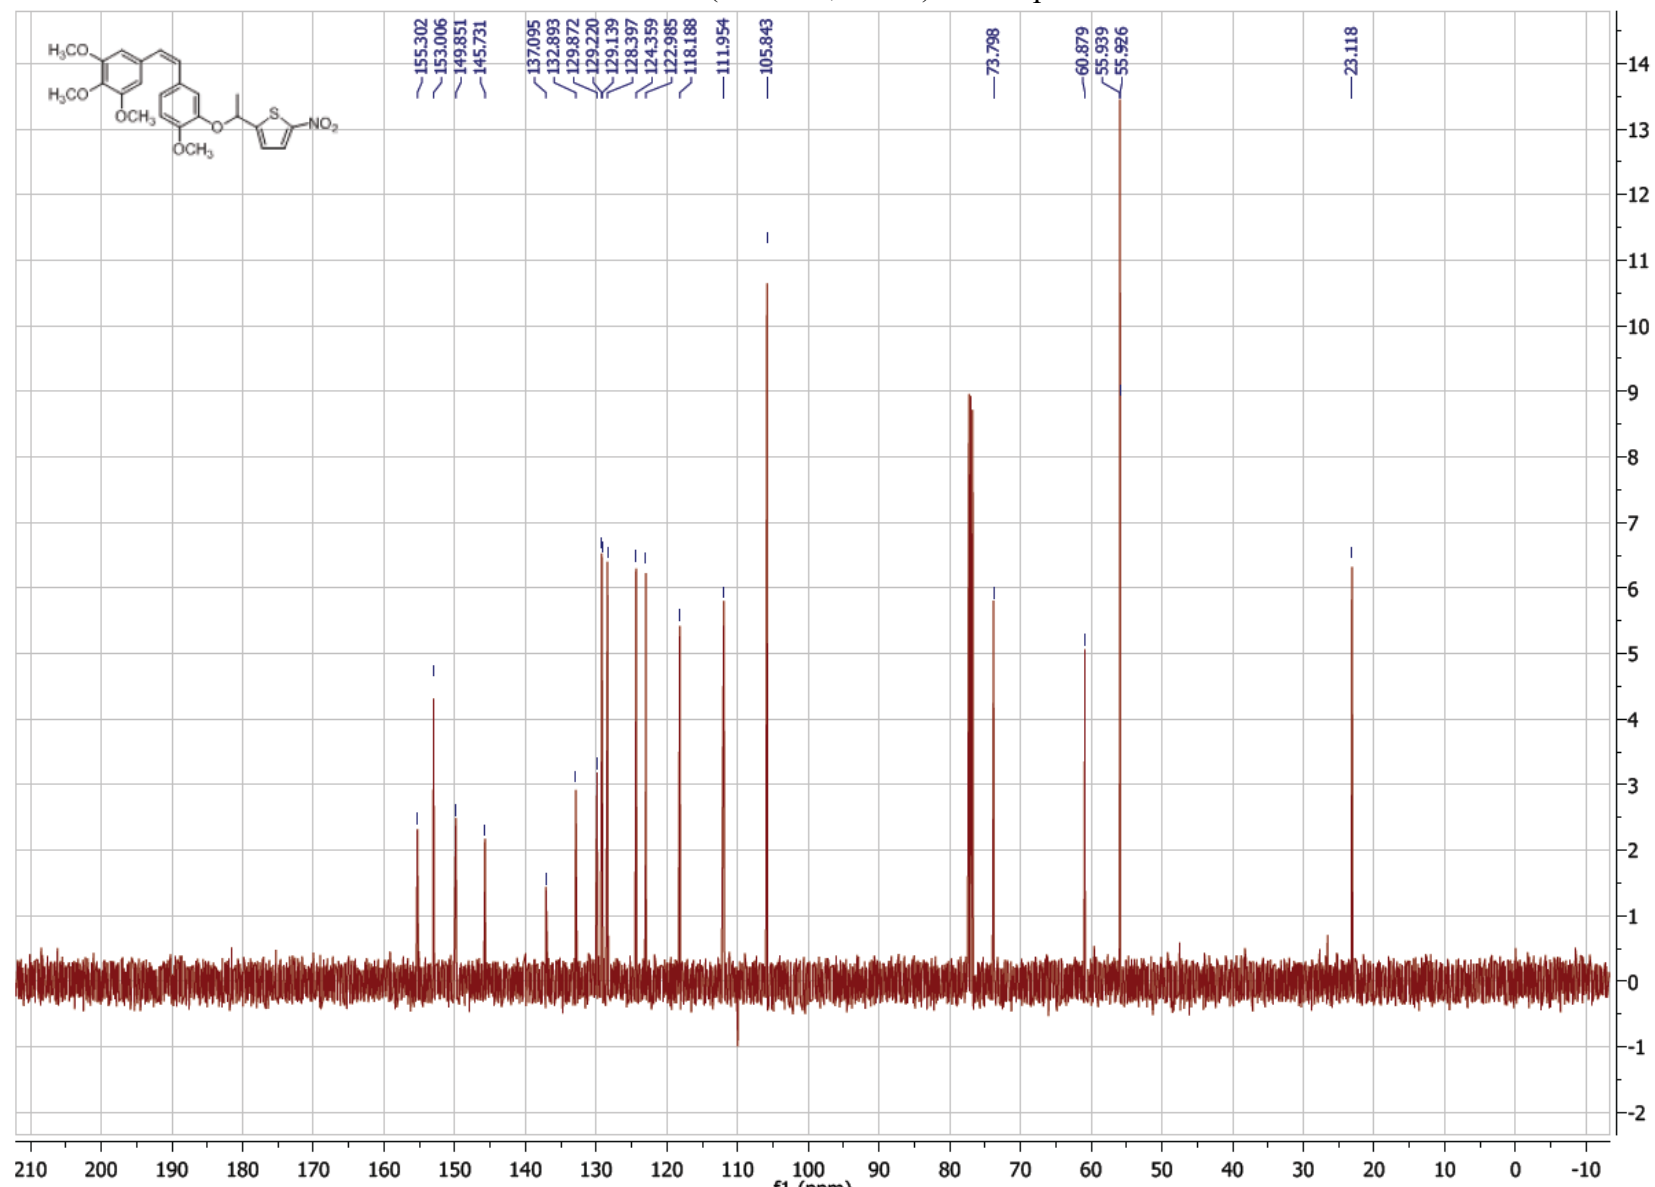

## HPLC Trace of compound 44

Data File C:\Chem32\1\Data\Blake\CA4 Monothio pTLC5.D

Sample Name: CA4 Monothio pTLC5

```
=====
Acq. Operator   : SYSTEM
Sample Operator : SYSTEM
Acq. Instrument : 1200 HPLC                      Location : 1
Injection Date  : 7/8/2016 4:47:42 PM
                                           Inj Volume : No inj
Acq. Method     : C:\CHEM32\1\METHODS\GRAD 2 50-90 ACN.M
Last changed    : 4/30/2014 1:53:57 AM by ERICAP
Analysis Method : C:\CHEM32\1\METHODS\RT-ACNWASH 2.M
Last changed    : 7/9/2015 2:27:22 PM by Blake
Method Info     : General Column Wash Method
```

Additional Info : Peak(s) manually integrated

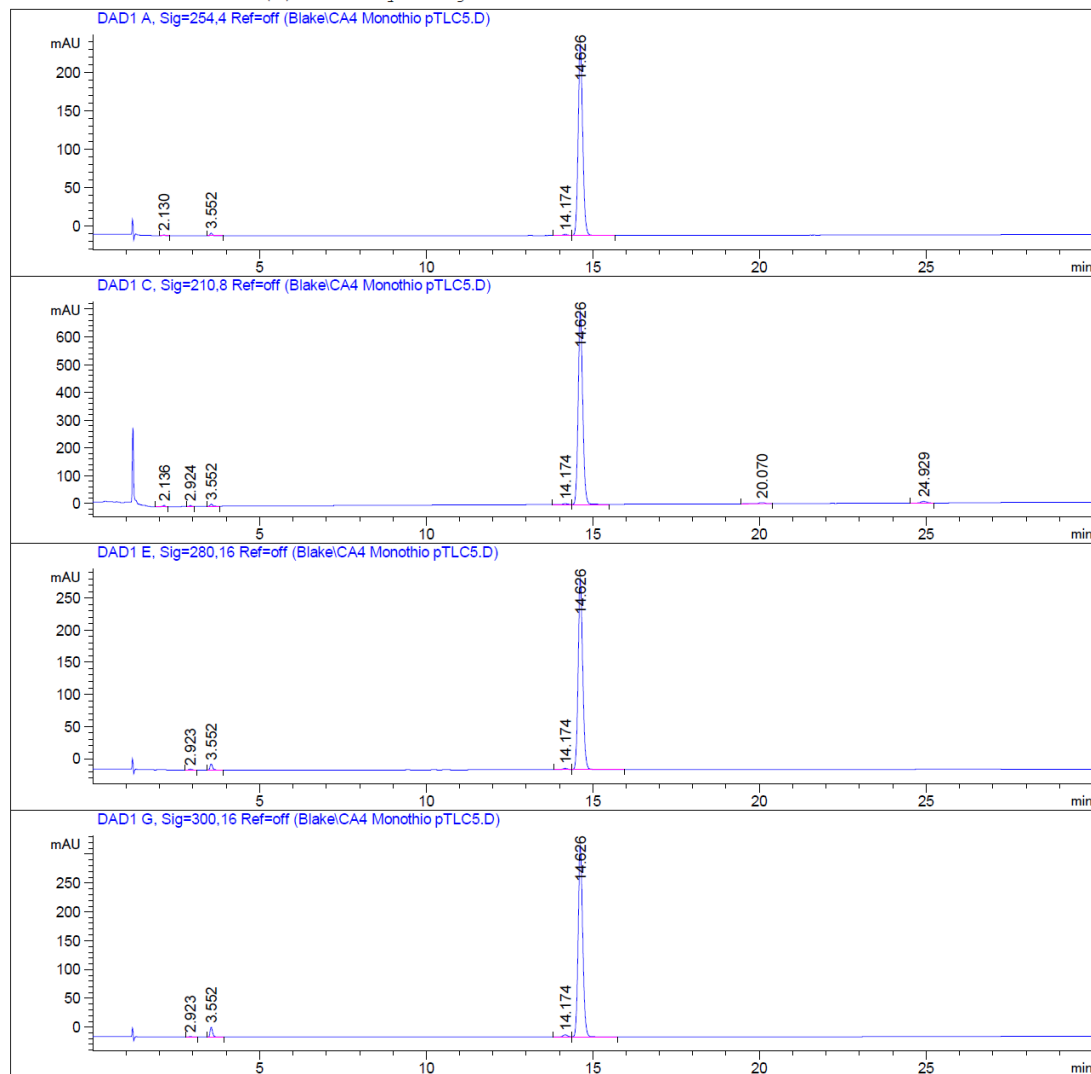

Data File C:\Chem32\1\Data\Blake\CA4 Monothio pTLC5.D  
Sample Name: CA4 Monothio pTLC5

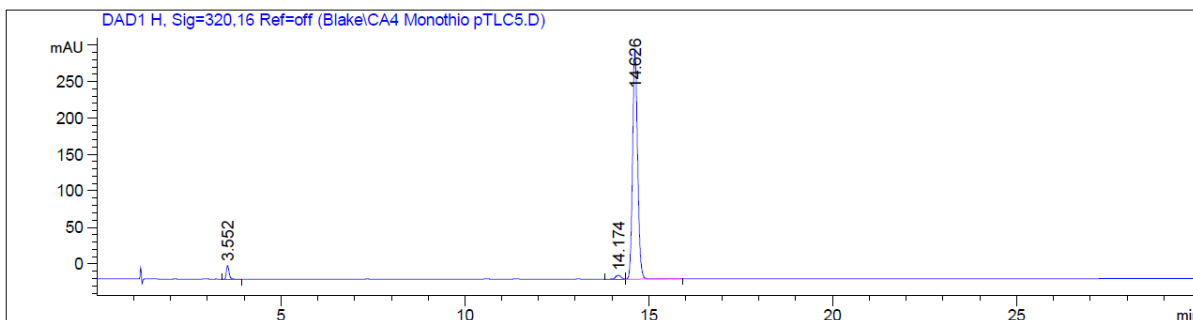

=====  
Area Percent Report  
=====

Sorted By : Signal  
Multiplier : 1.0000  
Dilution : 1.0000  
Use Multiplier & Dilution Factor with ISTDs

Signal 1: DAD1 A, Sig=254,4 Ref=off

| Peak # | RetTime [min] | Type | Width [min] | Area [mAU*s] | Height [mAU] | Area %  |
|--------|---------------|------|-------------|--------------|--------------|---------|
| 1      | 2.130         | BB   | 0.0777      | 5.62220      | 1.06346      | 0.2320  |
| 2      | 3.552         | BB   | 0.0820      | 18.60733     | 3.50377      | 0.7677  |
| 3      | 14.174        | BV   | 0.1472      | 13.58555     | 1.40050      | 0.5605  |
| 4      | 14.626        | VB   | 0.1481      | 2385.85034   | 248.38174    | 98.4398 |

Totals : 2423.66542 254.34947

Signal 2: DAD1 C, Sig=210,8 Ref=off

| Peak # | RetTime [min] | Type | Width [min] | Area [mAU*s] | Height [mAU] | Area %  |
|--------|---------------|------|-------------|--------------|--------------|---------|
| 1      | 2.136         | BB   | 0.0801      | 28.96852     | 5.26916      | 0.4191  |
| 2      | 2.924         | BB   | 0.0764      | 14.33322     | 2.96729      | 0.2074  |
| 3      | 3.552         | BB   | 0.0816      | 36.36889     | 6.88614      | 0.5262  |
| 4      | 14.174        | BV   | 0.1490      | 31.27967     | 3.17406      | 0.4525  |
| 5      | 14.626        | VB   | 0.1481      | 6678.81738   | 694.79736    | 96.6230 |
| 6      | 20.070        | BB   | 0.1771      | 53.05204     | 4.58050      | 0.7675  |
| 7      | 24.929        | BB   | 0.1923      | 69.42081     | 5.53725      | 1.0043  |

Totals : 6912.24055 723.21177

Data File C:\Chem32\1\Data\Blake\CA4 Monothio pTLC5.D  
Sample Name: CA4 Monothio pTLC5

Signal 3: DAD1 E, Sig=280,16 Ref=off

| Peak #   | RetTime [min] | Type | Width [min] | Area [mAU*s] | Height [mAU] | Area %  |
|----------|---------------|------|-------------|--------------|--------------|---------|
| 1        | 2.923         | BB   | 0.0811      | 6.66962      | 1.23359      | 0.2272  |
| 2        | 3.552         | BB   | 0.0819      | 49.89929     | 9.39798      | 1.7000  |
| 3        | 14.174        | BV   | 0.1489      | 19.37604     | 2.00204      | 0.6601  |
| 4        | 14.626        | VB   | 0.1481      | 2859.24146   | 297.65536    | 97.4126 |
| Totals : |               |      |             | 2935.18641   | 310.28898    |         |

Signal 4: DAD1 G, Sig=300,16 Ref=off

| Peak #   | RetTime [min] | Type | Width [min] | Area [mAU*s] | Height [mAU] | Area %  |
|----------|---------------|------|-------------|--------------|--------------|---------|
| 1        | 2.923         | BB   | 0.0843      | 7.20654      | 1.26827      | 0.2164  |
| 2        | 3.552         | BB   | 0.0820      | 91.39571     | 17.19951     | 2.7441  |
| 3        | 14.174        | BV   | 0.1448      | 36.30665     | 3.82295      | 1.0901  |
| 4        | 14.626        | VB   | 0.1481      | 3195.77393   | 332.57687    | 95.9495 |
| Totals : |               |      |             | 3330.68283   | 354.86761    |         |

Signal 5: DAD1 H, Sig=320,16 Ref=off

| Peak #   | RetTime [min] | Type | Width [min] | Area [mAU*s] | Height [mAU] | Area %  |
|----------|---------------|------|-------------|--------------|--------------|---------|
| 1        | 3.552         | BB   | 0.0820      | 96.86775     | 18.21322     | 3.0557  |
| 2        | 14.174        | BV   | 0.1463      | 49.83819     | 5.27211      | 1.5721  |
| 3        | 14.626        | VB   | 0.1482      | 3023.37158   | 314.28720    | 95.3722 |
| Totals : |               |      |             | 3170.07752   | 337.77254    |         |

\*\*\* End of Report \*\*\*

# Mass Spectrum of Compound 44

CA4-monomethyl\_130415122841

4/15/2013 12:28:42 PM

BW-101-42

CA4-monomethyl\_130415122841#5 RT: 0.04 AV: 1 NL: 3.60E7  
T: FTMS + p ESI Full ms [100.00-1000.00]

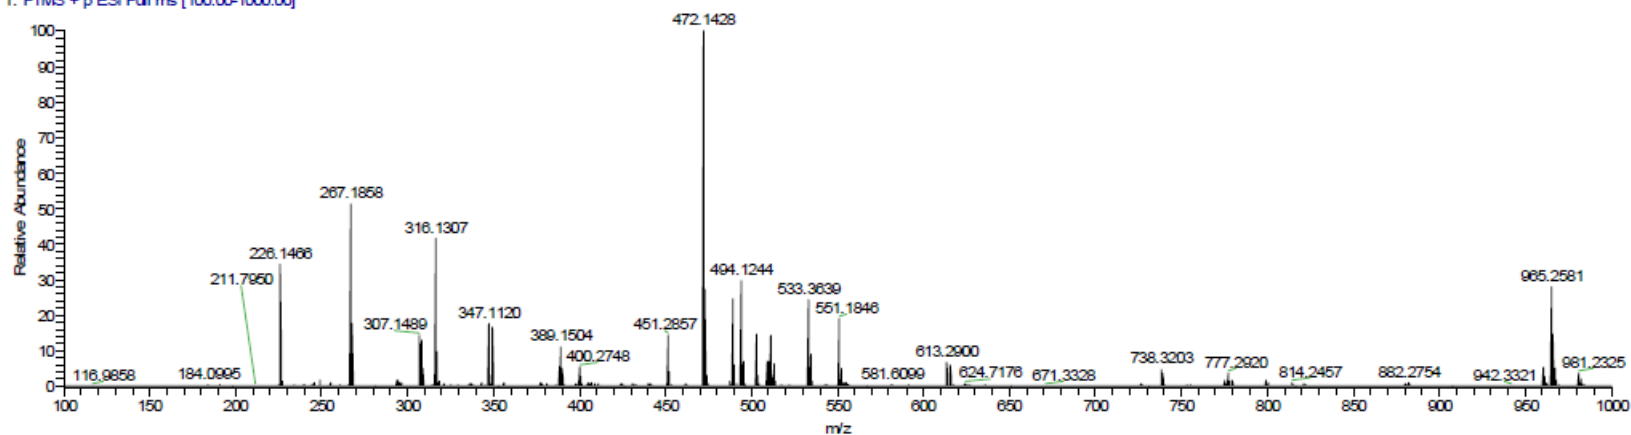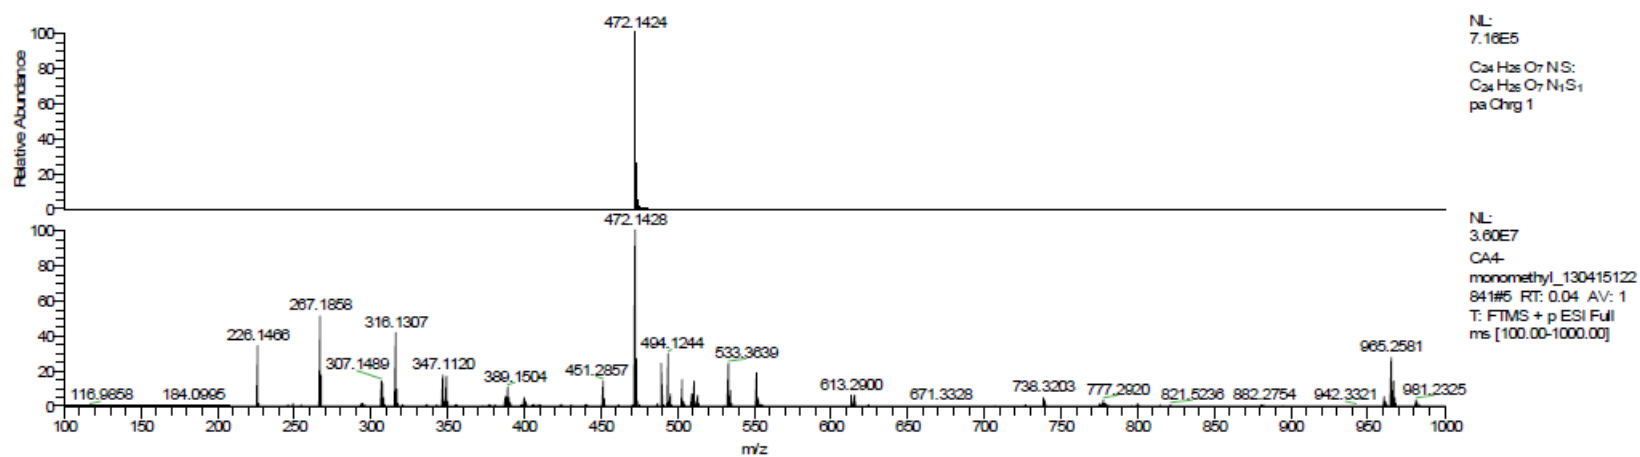

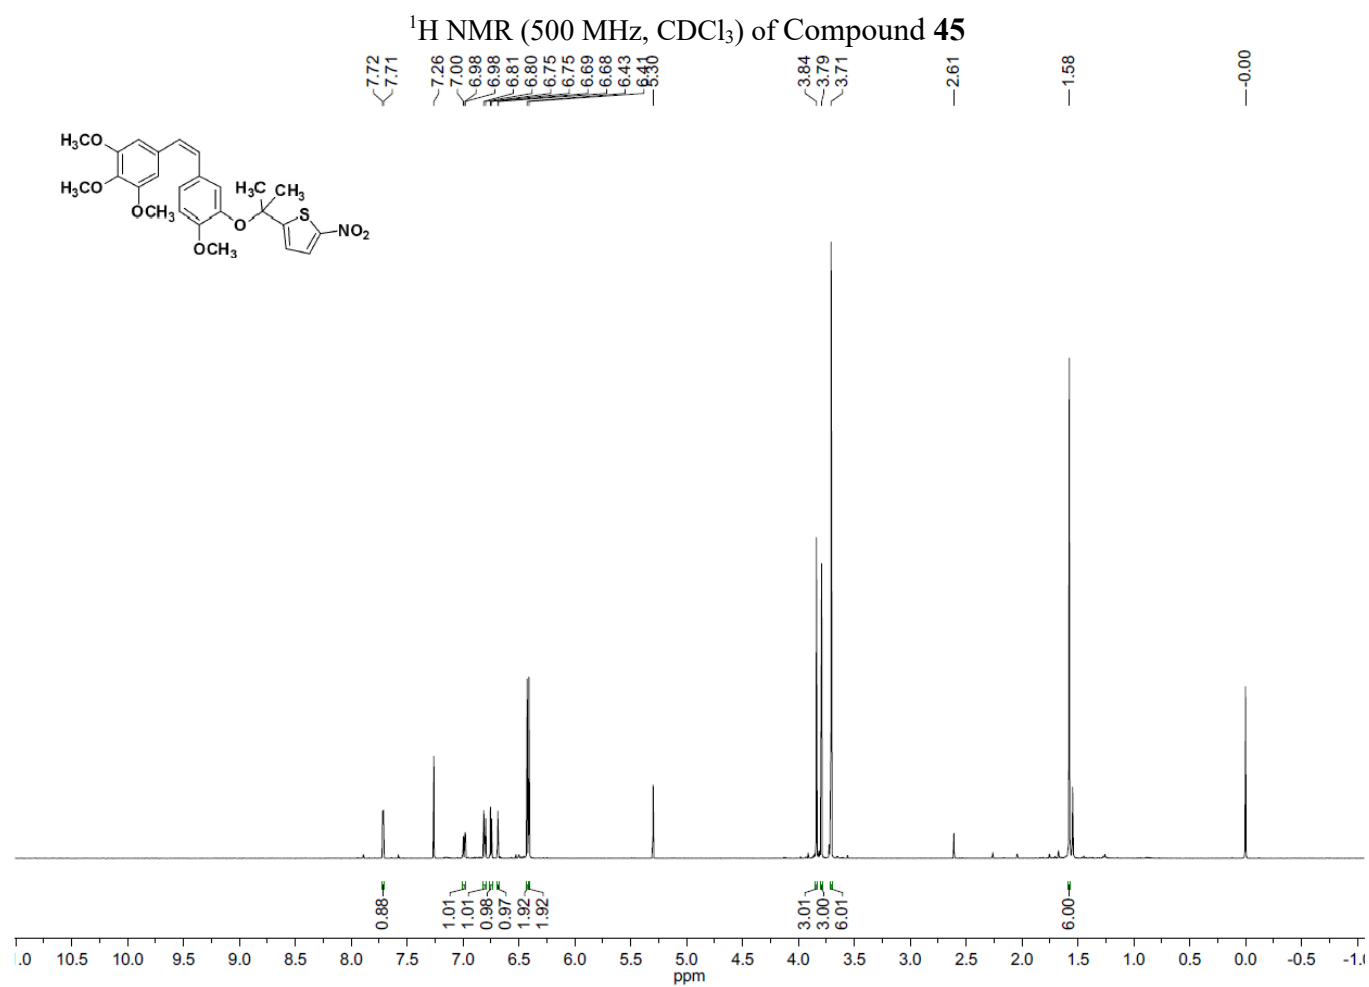

<sup>13</sup>C NMR (500 MHz, CDCl<sub>3</sub>) of Compound **45**

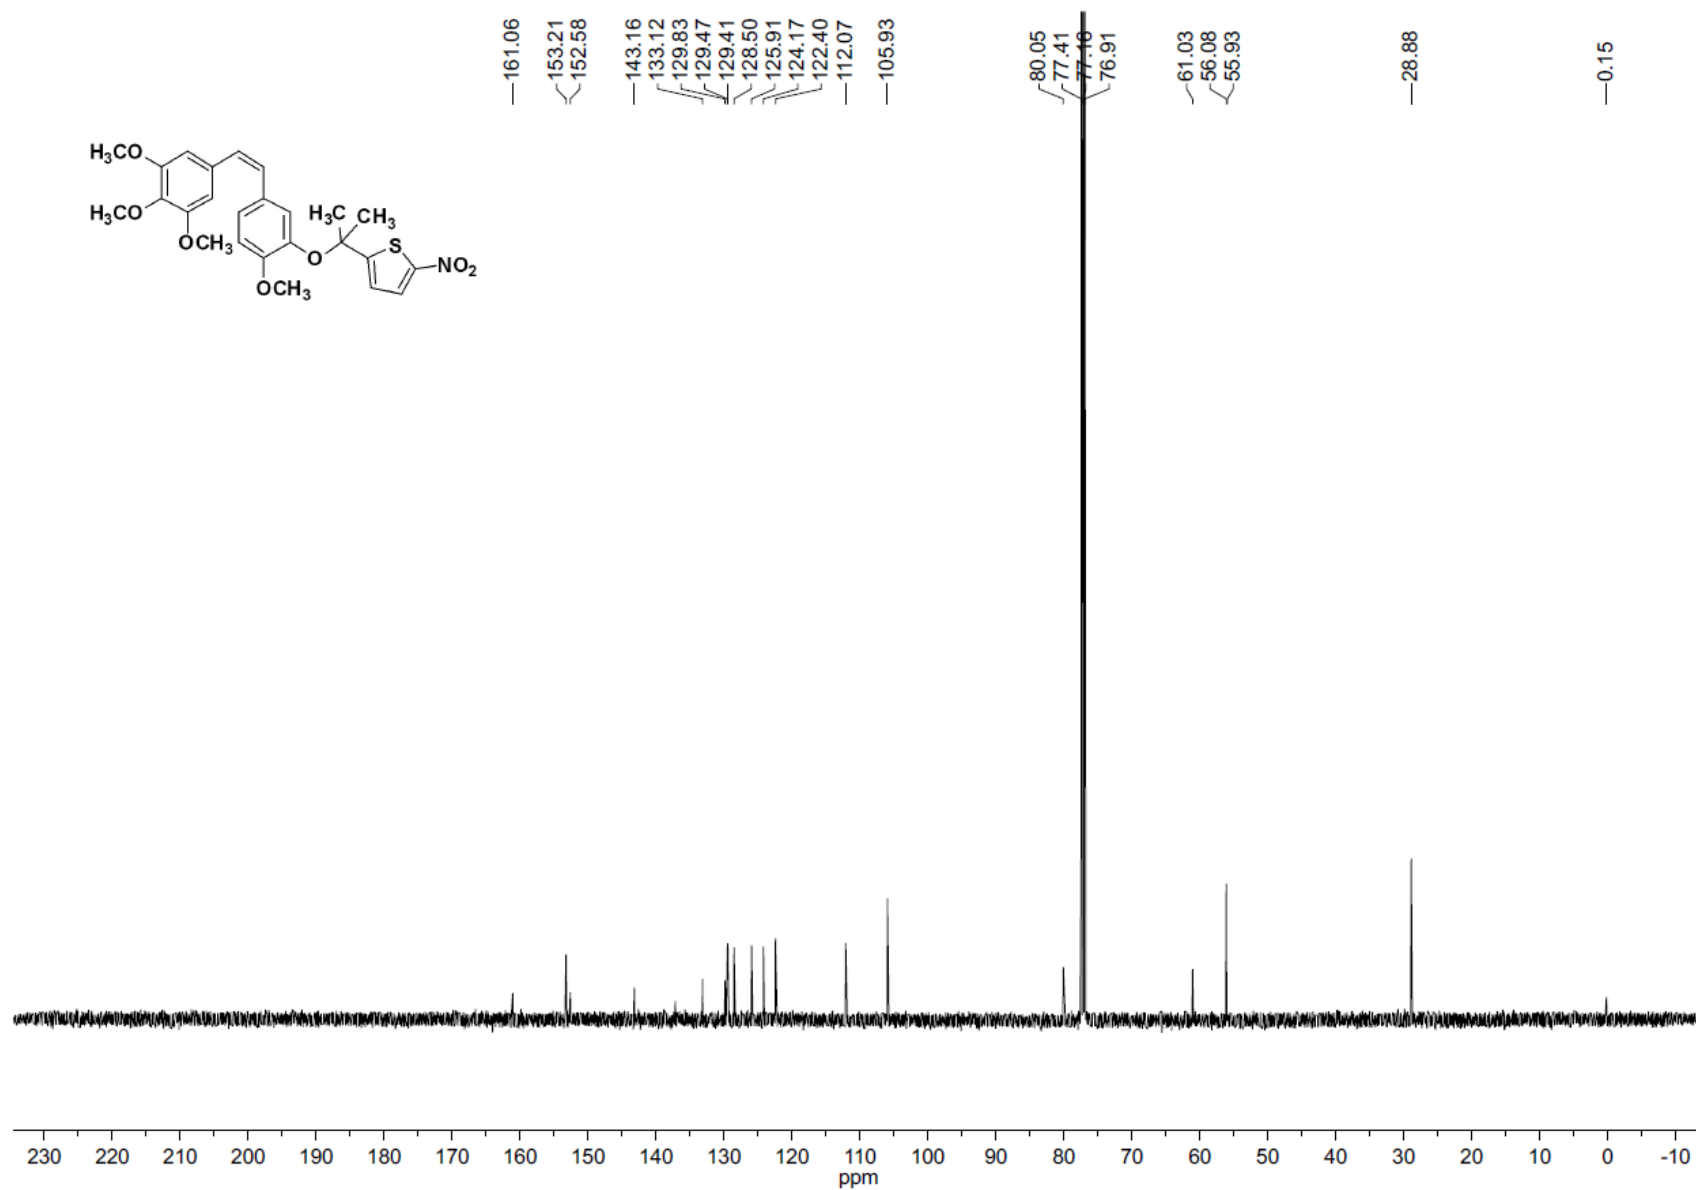

# HPLC Trace of Compound 45

Data File C:\Chem32\1\Data\Debo\MT\_IV\_30\_July232016.D  
Sample Name: MT\_IV\_30\_July232016

=====

|                 |                                          |                     |
|-----------------|------------------------------------------|---------------------|
| Acq. Operator   | : SYSTEM                                 |                     |
| Sample Operator | : SYSTEM                                 |                     |
| Acq. Instrument | : 1200 HPLC                              | Location : 1        |
| Injection Date  | : 7/23/2016 9:42:36 AM                   |                     |
|                 |                                          | Inj Volume : No inj |
| Method          | : C:\Chem32\1\Methods\GRAD 2 50-90 ACN.M |                     |
| Last changed    | : 4/30/2014 1:53:57 AM by ERICAP         |                     |

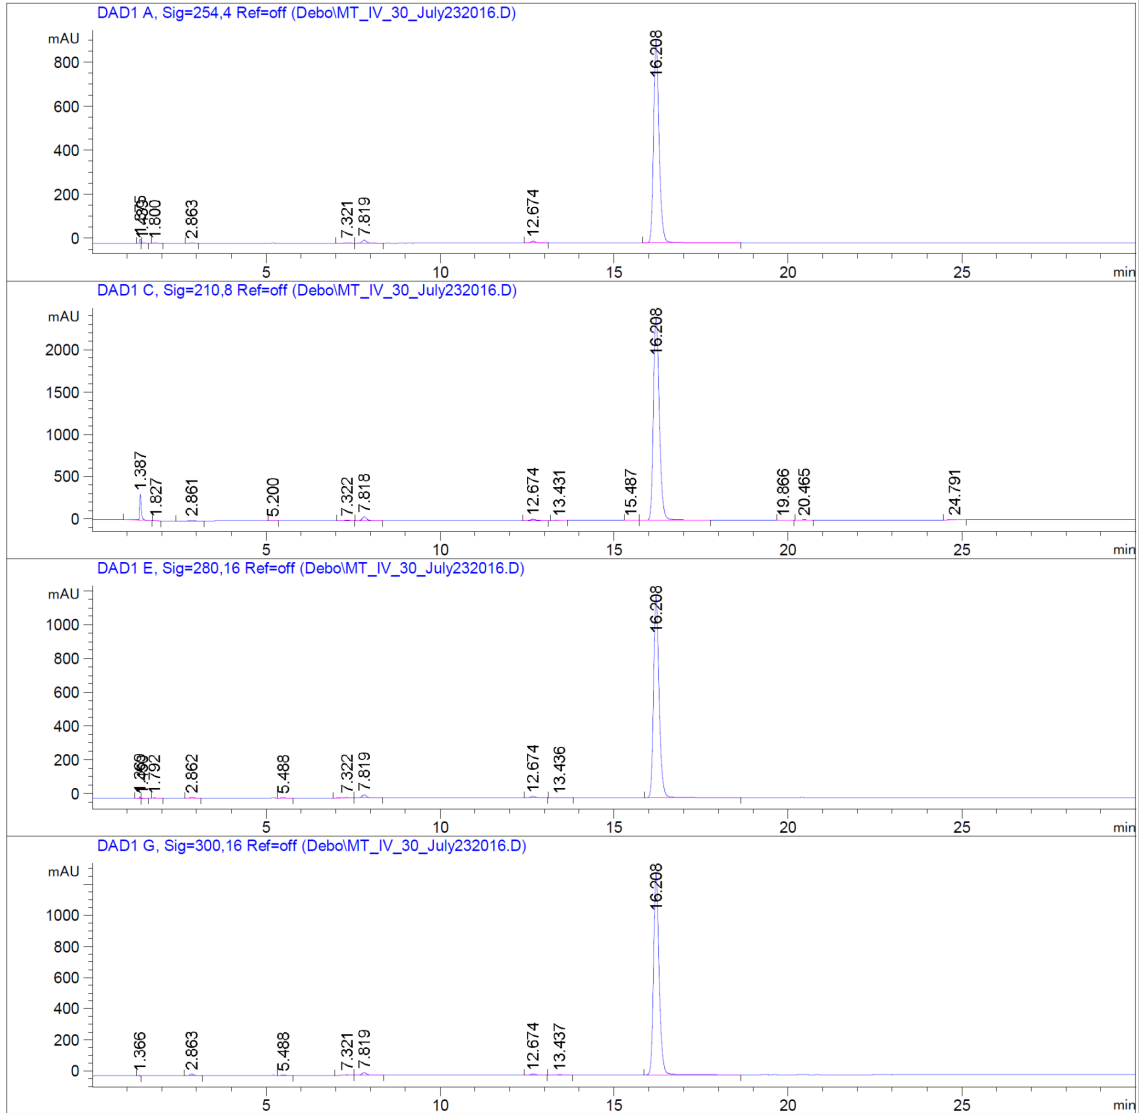

Data File C:\Chem32\1\Data\Debo\MT\_IV\_30\_July232016.D  
Sample Name: MT\_IV\_30\_July232016

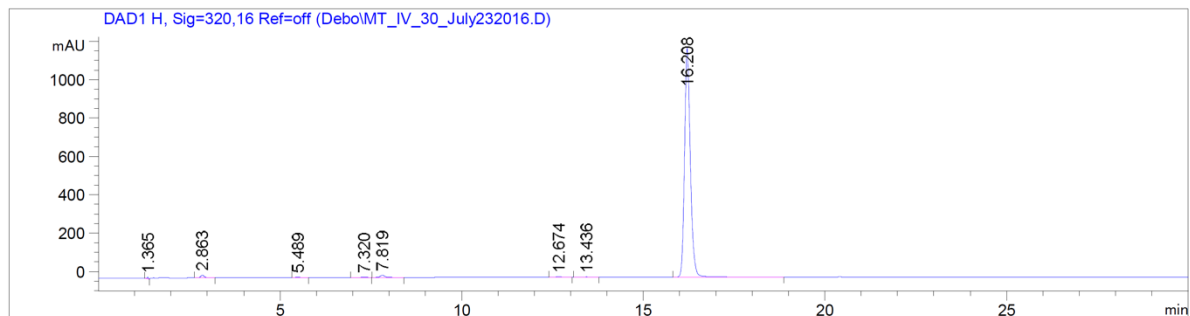

=====  
Area Percent Report  
=====

Sorted By : Signal  
Multiplier : 1.0000  
Dilution : 1.0000  
Use Multiplier & Dilution Factor with ISTDs

Signal 1: DAD1 A, Sig=254,4 Ref=off

| Peak # | RetTime [min] | Type | Width [min] | Area [mAU*s] | Height [mAU] | Area %  |
|--------|---------------|------|-------------|--------------|--------------|---------|
| 1      | 1.375         | BB   | 0.0395      | 47.84431     | 20.32474     | 0.4520  |
| 2      | 1.439         | BB   | 0.0639      | 8.20352      | 1.77653      | 0.0775  |
| 3      | 1.800         | BB   | 0.1336      | 10.87313     | 1.30011      | 0.1027  |
| 4      | 2.863         | BB   | 0.1040      | 22.44121     | 3.27424      | 0.2120  |
| 5      | 7.321         | BB   | 0.1386      | 22.19114     | 2.47454      | 0.2096  |
| 6      | 7.819         | BB   | 0.1408      | 126.82910    | 13.59680     | 1.1981  |
| 7      | 12.674        | BB   | 0.1491      | 83.87212     | 8.50225      | 0.7923  |
| 8      | 16.208        | BB   | 0.1699      | 1.02636e4    | 921.47638    | 96.9558 |

Totals : 1.05859e4 972.72559

Signal 2: DAD1 C, Sig=210,8 Ref=off

| Peak # | RetTime [min] | Type | Width [min] | Area [mAU*s] | Height [mAU] | Area %  |
|--------|---------------|------|-------------|--------------|--------------|---------|
| 1      | 1.387         | BB   | 0.0530      | 1065.00549   | 303.36530    | 3.4833  |
| 2      | 1.827         | BB   | 0.1043      | 35.50399     | 5.15995      | 0.1161  |
| 3      | 2.861         | BB   | 0.1512      | 77.23377     | 7.08497      | 0.2526  |
| 4      | 5.200         | BB   | 0.1118      | 18.82471     | 2.62088      | 0.0616  |
| 5      | 7.322         | BB   | 0.1355      | 70.29004     | 7.92301      | 0.2299  |
| 6      | 7.818         | BB   | 0.1396      | 405.49631    | 43.97836     | 1.3263  |
| 7      | 12.674        | BB   | 0.1489      | 133.60876    | 13.56780     | 0.4370  |
| 8      | 13.431        | BB   | 0.1597      | 12.15954     | 1.14720      | 0.0398  |
| 9      | 15.487        | BB   | 0.1574      | 21.32000     | 2.11807      | 0.0697  |
| 10     | 16.208        | BB   | 0.1878      | 2.86536e4    | 2391.41113   | 93.7182 |
| 11     | 19.866        | BB   | 0.1788      | 18.68639     | 1.64127      | 0.0611  |

Data File C:\Chem32\1\Data\Debo\MT\_IV\_30\_July232016.D  
Sample Name: MT\_IV\_30\_July232016

| Peak # | RetTime [min] | Type | Width [min] | Area [mAU*s] | Height [mAU] | Area % |
|--------|---------------|------|-------------|--------------|--------------|--------|
| 12     | 20.465        | BB   | 0.2256      | 28.00288     | 1.99733      | 0.0916 |
| 13     | 24.791        | BB   | 0.2067      | 34.46542     | 2.53411      | 0.1127 |

Totals : 3.05742e4 2784.54936

Signal 3: DAD1 E, Sig=280,16 Ref=off

| Peak # | RetTime [min] | Type | Width [min] | Area [mAU*s] | Height [mAU] | Area %  |
|--------|---------------|------|-------------|--------------|--------------|---------|
| 1      | 1.369         | BB   | 0.0424      | 31.02741     | 9.94166      | 0.2251  |
| 2      | 1.450         | BB   | 0.0881      | 22.86131     | 3.60076      | 0.1659  |
| 3      | 1.792         | BB   | 0.1071      | 9.47275      | 1.24050      | 0.0687  |
| 4      | 2.862         | BB   | 0.1074      | 41.54430     | 5.81458      | 0.3014  |
| 5      | 5.488         | BB   | 0.1153      | 8.60729      | 1.12513      | 0.0625  |
| 6      | 7.322         | BV   | 0.1411      | 31.28039     | 3.34435      | 0.2270  |
| 7      | 7.819         | VB   | 0.1429      | 178.90128    | 18.81951     | 1.2981  |
| 8      | 12.674        | BB   | 0.1480      | 80.48096     | 8.23416      | 0.5840  |
| 9      | 13.436        | BB   | 0.1775      | 15.14640     | 1.28551      | 0.1099  |
| 10     | 16.208        | BB   | 0.1701      | 1.33622e4    | 1198.67053   | 96.9574 |

Totals : 1.37815e4 1252.07668

Signal 4: DAD1 G, Sig=300,16 Ref=off

| Peak # | RetTime [min] | Type | Width [min] | Area [mAU*s] | Height [mAU] | Area %  |
|--------|---------------|------|-------------|--------------|--------------|---------|
| 1      | 1.366         | BB   | 0.0420      | 26.20239     | 8.49298      | 0.1760  |
| 2      | 2.863         | BB   | 0.1074      | 62.68039     | 8.76715      | 0.4210  |
| 3      | 5.488         | BB   | 0.1181      | 13.51595     | 1.75055      | 0.0908  |
| 4      | 7.321         | BB   | 0.1379      | 28.18667     | 3.10416      | 0.1893  |
| 5      | 7.819         | BB   | 0.1413      | 166.55807    | 17.77341     | 1.1187  |
| 6      | 12.674        | BB   | 0.1481      | 56.69556     | 5.79743      | 0.3808  |
| 7      | 13.437        | BB   | 0.1756      | 19.28821     | 1.65920      | 0.1295  |
| 8      | 16.208        | BB   | 0.1707      | 1.45158e4    | 1295.72217   | 97.4939 |

Totals : 1.48890e4 1343.06704

Signal 5: DAD1 H, Sig=320,16 Ref=off

| Peak # | RetTime [min] | Type | Width [min] | Area [mAU*s] | Height [mAU] | Area % |
|--------|---------------|------|-------------|--------------|--------------|--------|
| 1      | 1.365         | BB   | 0.0423      | 24.93155     | 8.01595      | 0.1815 |
| 2      | 2.863         | BB   | 0.1072      | 98.64788     | 13.83761     | 0.7182 |
| 3      | 5.489         | BB   | 0.1194      | 20.06679     | 2.56164      | 0.1461 |
| 4      | 7.320         | BB   | 0.1469      | 19.44419     | 2.00913      | 0.1416 |

Data File C:\Chem32\1\Data\Debo\MT\_IV\_30\_July232016.D  
Sample Name: MT\_IV\_30\_July232016

| Peak<br># | RetTime<br>[min] | Type | Width<br>[min] | Area<br>[mAU*s] | Height<br>[mAU] | Area<br>% |
|-----------|------------------|------|----------------|-----------------|-----------------|-----------|
| 5         | 7.819            | BB   | 0.1450         | 110.30787       | 11.59118        | 0.8031    |
| 6         | 12.674           | BB   | 0.1484         | 33.36906        | 3.40343         | 0.2430    |
| 7         | 13.436           | BB   | 0.1734         | 18.38263        | 1.58354         | 0.1338    |
| 8         | 16.208           | BB   | 0.1712         | 1.34095e4       | 1192.82092      | 97.6326   |

Totals : 1.37347e4 1235.82340

=====  
\*\*\* End of Report \*\*\*

### X-Ray Crystallography Data for Compound **45**

Crystallographic data for compound **45** (CCDC-1502328) reported in this paper have been deposited with the Cambridge Crystallographic Data Centre. Copies of the data can be obtained, free of charge, on application to the Director, CCDC, 12 Union Road, Cambridge CB2 1EZ, UK (fax:+44-(0)1223-336033 or e-mail: [deposit@ccdc.cam.ac.uk](mailto:deposit@ccdc.cam.ac.uk)). Compound **45** is referred to as KP61 in the tables on pages S176-S183.

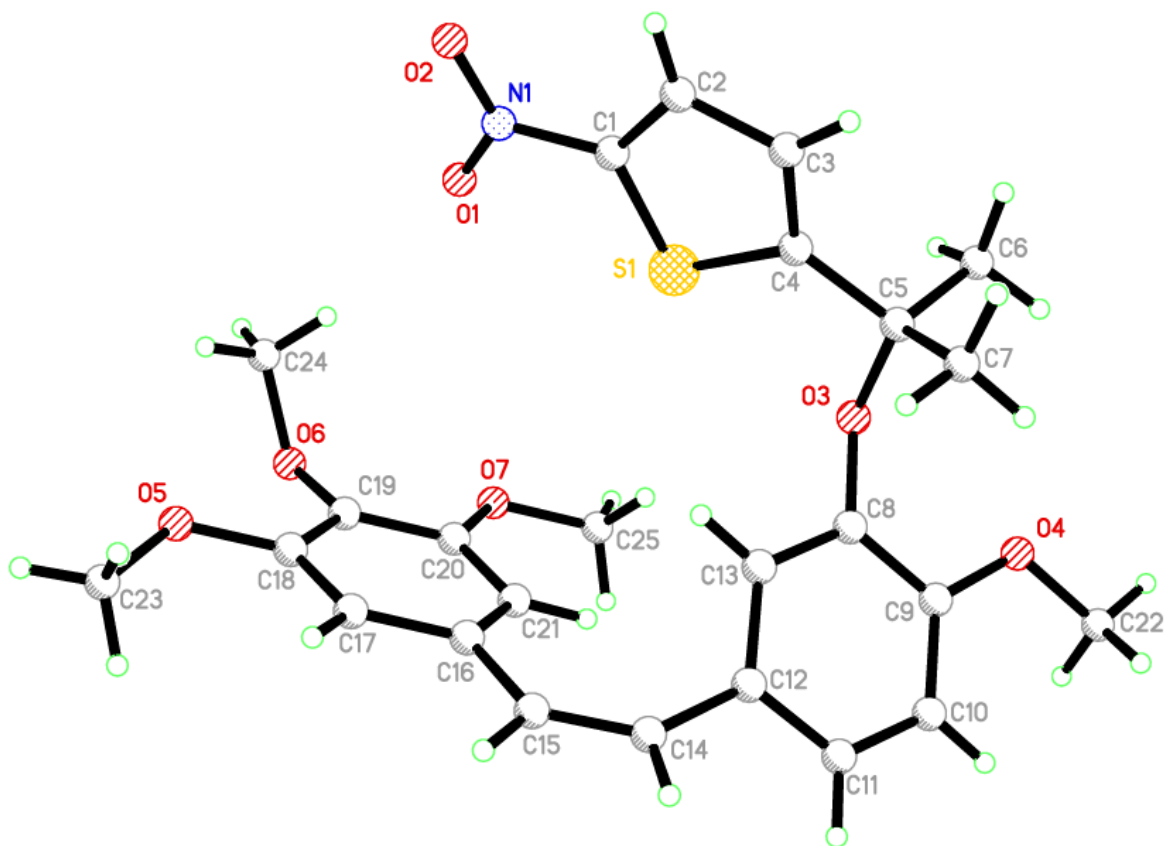

Table S1. Crystal data and structure refinement for kp61.

|                                   |                                                    |                  |
|-----------------------------------|----------------------------------------------------|------------------|
| Identification code               | kp61                                               |                  |
| Empirical formula                 | C <sub>25</sub> H <sub>27</sub> N O <sub>7</sub> S |                  |
| Formula weight                    | 485.54                                             |                  |
| Temperature                       | 110(2) K                                           |                  |
| Wavelength                        | 0.71073 Å                                          |                  |
| Crystal system                    | Triclinic                                          |                  |
| Space group                       | P-1                                                |                  |
| Unit cell dimensions              | a = 8.0895(7) Å                                    | α = 100.514(5)°. |
|                                   | b = 12.0696(10) Å                                  | β = 104.240(5)°. |
|                                   | c = 14.0112(12) Å                                  | γ = 108.180(5)°. |
| Volume                            | 1208.84(18) Å <sup>3</sup>                         |                  |
| Z                                 | 2                                                  |                  |
| Density (calculated)              | 1.334 Mg/m <sup>3</sup>                            |                  |
| Absorption coefficient            | 0.179 mm <sup>-1</sup>                             |                  |
| F(000)                            | 512                                                |                  |
| Crystal size                      | 0.31 x 0.28 x 0.11 mm <sup>3</sup>                 |                  |
| Theta range for data collection   | 2.06 to 26.46°.                                    |                  |
| Index ranges                      | -9 ≤ h ≤ 10, -15 ≤ k ≤ 15, -16 ≤ l ≤ 17            |                  |
| Reflections collected             | 12273                                              |                  |
| Independent reflections           | 4851 [R(int) = 0.0427]                             |                  |
| Completeness to theta = 26.46°    | 97.5 %                                             |                  |
| Absorption correction             | Semi-empirical from equivalents                    |                  |
| Max. and min. transmission        | 0.9802 and 0.9465                                  |                  |
| Refinement method                 | Full-matrix least-squares on F <sup>2</sup>        |                  |
| Data / restraints / parameters    | 4851 / 0 / 313                                     |                  |
| Goodness-of-fit on F <sup>2</sup> | 1.028                                              |                  |
| Final R indices [I > 2σ(I)]       | R1 = 0.0457, wR2 = 0.1101                          |                  |
| R indices (all data)              | R1 = 0.0772, wR2 = 0.1277                          |                  |
| Largest diff. peak and hole       | 0.158 and -0.218 e.Å <sup>-3</sup>                 |                  |

Table S2. Atomic coordinates ( $\times 10^4$ ) and equivalent isotropic displacement parameters ( $\text{\AA}^2 \times 10^3$ ) for kp61.  $U(\text{eq})$  is defined as one third of the trace of the orthogonalized  $U^{ij}$  tensor.

|       | x        | y       | z        | $U(\text{eq})$ |
|-------|----------|---------|----------|----------------|
| S(1)  | 3104(1)  | 5110(1) | 1330(1)  | 61(1)          |
| O(1)  | 975(3)   | 2648(2) | 59(2)    | 112(1)         |
| O(2)  | 88(3)    | 3044(2) | -1374(1) | 94(1)          |
| O(3)  | 5098(2)  | 7059(1) | 3092(1)  | 52(1)          |
| O(4)  | 7261(2)  | 8749(1) | 4853(1)  | 66(1)          |
| O(5)  | -4646(2) | 1366(2) | 1585(1)  | 79(1)          |
| O(6)  | -1425(2) | 1040(1) | 2114(1)  | 71(1)          |
| O(7)  | 1682(2)  | 2868(1) | 3284(1)  | 65(1)          |
| N(1)  | 959(3)   | 3351(2) | -460(2)  | 73(1)          |
| C(1)  | 2038(3)  | 4618(2) | 40(2)    | 60(1)          |
| C(2)  | 2242(4)  | 5513(3) | -422(2)  | 80(1)          |
| C(3)  | 3320(4)  | 6639(2) | 290(2)   | 80(1)          |
| C(4)  | 3899(3)  | 6577(2) | 1275(2)  | 53(1)          |
| C(5)  | 5164(3)  | 7583(2) | 2234(2)  | 56(1)          |
| C(6)  | 7146(3)  | 7905(2) | 2232(2)  | 84(1)          |
| C(7)  | 4646(4)  | 8688(2) | 2330(2)  | 69(1)          |
| C(8)  | 4284(3)  | 7434(2) | 3785(1)  | 45(1)          |
| C(9)  | 5429(3)  | 8284(2) | 4725(2)  | 49(1)          |
| C(10) | 4634(3)  | 8594(2) | 5448(2)  | 56(1)          |
| C(11) | 2758(3)  | 8086(2) | 5236(2)  | 56(1)          |
| C(12) | 1602(3)  | 7231(2) | 4313(2)  | 49(1)          |
| C(13) | 2427(3)  | 6927(2) | 3591(2)  | 47(1)          |
| C(14) | -406(3)  | 6740(2) | 4103(2)  | 61(1)          |
| C(15) | -1683(3) | 5628(2) | 3628(2)  | 60(1)          |
| C(16) | -1551(3) | 4457(2) | 3224(2)  | 50(1)          |
| C(17) | -3142(3) | 3499(2) | 2579(2)  | 57(1)          |
| C(18) | -3120(3) | 2368(2) | 2196(2)  | 56(1)          |
| C(19) | -1484(3) | 2175(2) | 2432(2)  | 54(1)          |
| C(20) | 127(3)   | 3133(2) | 3083(2)  | 51(1)          |
| C(21) | 85(3)    | 4252(2) | 3489(2)  | 52(1)          |
| C(22) | 8469(3)  | 9566(2) | 5828(2)  | 74(1)          |

|       |          |         |         |       |
|-------|----------|---------|---------|-------|
| C(23) | -6392(4) | 1422(3) | 1509(2) | 99(1) |
| C(24) | -1556(5) | 656(3)  | 1080(2) | 98(1) |
| C(25) | 3340(3)  | 3811(2) | 3954(2) | 66(1) |

---

Table S3. Bond lengths [Å] and angles [°] for kp61.

---

|             |          |
|-------------|----------|
| S(1)-C(1)   | 1.699(2) |
| S(1)-C(4)   | 1.707(2) |
| O(1)-N(1)   | 1.215(3) |
| O(2)-N(1)   | 1.222(3) |
| O(3)-C(8)   | 1.387(2) |
| O(3)-C(5)   | 1.462(2) |
| O(4)-C(9)   | 1.362(2) |
| O(4)-C(22)  | 1.430(3) |
| O(5)-C(18)  | 1.374(3) |
| O(5)-C(23)  | 1.413(3) |
| O(6)-C(19)  | 1.380(2) |
| O(6)-C(24)  | 1.405(3) |
| O(7)-C(20)  | 1.369(2) |
| O(7)-C(25)  | 1.419(3) |
| N(1)-C(1)   | 1.438(3) |
| C(1)-C(2)   | 1.344(3) |
| C(2)-C(3)   | 1.393(3) |
| C(3)-C(4)   | 1.368(3) |
| C(4)-C(5)   | 1.510(3) |
| C(5)-C(7)   | 1.511(3) |
| C(5)-C(6)   | 1.528(3) |
| C(8)-C(13)  | 1.368(3) |
| C(8)-C(9)   | 1.399(3) |
| C(9)-C(10)  | 1.383(3) |
| C(10)-C(11) | 1.378(3) |
| C(11)-C(12) | 1.389(3) |
| C(12)-C(13) | 1.397(3) |
| C(12)-C(14) | 1.476(3) |
| C(14)-C(15) | 1.335(3) |
| C(15)-C(16) | 1.470(3) |
| C(16)-C(17) | 1.389(3) |
| C(16)-C(21) | 1.395(3) |
| C(17)-C(18) | 1.380(3) |
| C(18)-C(19) | 1.386(3) |

|                   |            |
|-------------------|------------|
| C(19)-C(20)       | 1.399(3)   |
| C(20)-C(21)       | 1.380(3)   |
| C(1)-S(1)-C(4)    | 90.52(11)  |
| C(8)-O(3)-C(5)    | 120.04(14) |
| C(9)-O(4)-C(22)   | 117.76(18) |
| C(18)-O(5)-C(23)  | 117.7(2)   |
| C(19)-O(6)-C(24)  | 115.77(18) |
| C(20)-O(7)-C(25)  | 117.19(16) |
| O(1)-N(1)-O(2)    | 124.0(2)   |
| O(1)-N(1)-C(1)    | 117.4(2)   |
| O(2)-N(1)-C(1)    | 118.6(2)   |
| C(2)-C(1)-N(1)    | 125.5(2)   |
| C(2)-C(1)-S(1)    | 114.02(19) |
| N(1)-C(1)-S(1)    | 120.41(17) |
| C(1)-C(2)-C(3)    | 110.8(2)   |
| C(4)-C(3)-C(2)    | 113.7(2)   |
| C(3)-C(4)-C(5)    | 129.0(2)   |
| C(3)-C(4)-S(1)    | 110.99(18) |
| C(5)-C(4)-S(1)    | 119.94(15) |
| O(3)-C(5)-C(4)    | 106.26(15) |
| O(3)-C(5)-C(7)    | 113.24(16) |
| C(4)-C(5)-C(7)    | 111.97(19) |
| O(3)-C(5)-C(6)    | 104.83(18) |
| C(4)-C(5)-C(6)    | 109.06(18) |
| C(7)-C(5)-C(6)    | 111.10(19) |
| C(13)-C(8)-O(3)   | 121.15(17) |
| C(13)-C(8)-C(9)   | 120.55(18) |
| O(3)-C(8)-C(9)    | 118.14(18) |
| O(4)-C(9)-C(10)   | 124.90(19) |
| O(4)-C(9)-C(8)    | 116.78(18) |
| C(10)-C(9)-C(8)   | 118.3(2)   |
| C(11)-C(10)-C(9)  | 120.4(2)   |
| C(10)-C(11)-C(12) | 122.11(19) |
| C(11)-C(12)-C(13) | 116.73(19) |
| C(11)-C(12)-C(14) | 120.37(19) |

|                   |            |
|-------------------|------------|
| C(13)-C(12)-C(14) | 122.79(19) |
| C(8)-C(13)-C(12)  | 121.85(19) |
| C(15)-C(14)-C(12) | 131.8(2)   |
| C(14)-C(15)-C(16) | 132.1(2)   |
| C(17)-C(16)-C(21) | 118.51(19) |
| C(17)-C(16)-C(15) | 118.41(19) |
| C(21)-C(16)-C(15) | 123.0(2)   |
| C(18)-C(17)-C(16) | 121.3(2)   |
| O(5)-C(18)-C(17)  | 124.6(2)   |
| O(5)-C(18)-C(19)  | 115.2(2)   |
| C(17)-C(18)-C(19) | 120.2(2)   |
| O(6)-C(19)-C(18)  | 121.8(2)   |
| O(6)-C(19)-C(20)  | 118.94(19) |
| C(18)-C(19)-C(20) | 119.0(2)   |
| O(7)-C(20)-C(21)  | 124.03(19) |
| O(7)-C(20)-C(19)  | 115.48(18) |
| C(21)-C(20)-C(19) | 120.48(19) |
| C(20)-C(21)-C(16) | 120.5(2)   |

---

Symmetry transformations used to generate equivalent atoms:

Table S4. Anisotropic displacement parameters ( $\text{\AA}^2 \times 10^3$ ) for kp61. The anisotropic displacement factor exponent takes the form:  $-2\pi^2 [h^2 a^{*2} U^{11} + \dots + 2 h k a^* b^* U^{12}]$

|       | $U^{11}$ | $U^{22}$ | $U^{33}$ | $U^{23}$ | $U^{13}$ | $U^{12}$ |
|-------|----------|----------|----------|----------|----------|----------|
| S(1)  | 80(1)    | 59(1)    | 49(1)    | 21(1)    | 21(1)    | 30(1)    |
| O(1)  | 149(2)   | 71(1)    | 90(2)    | 22(1)    | 16(1)    | 25(1)    |
| O(2)  | 85(1)    | 116(2)   | 59(1)    | -3(1)    | 11(1)    | 37(1)    |
| O(3)  | 63(1)    | 57(1)    | 49(1)    | 18(1)    | 25(1)    | 33(1)    |
| O(4)  | 54(1)    | 66(1)    | 65(1)    | 8(1)     | 12(1)    | 18(1)    |
| O(5)  | 56(1)    | 72(1)    | 86(1)    | 8(1)     | 11(1)    | 13(1)    |
| O(6)  | 84(1)    | 48(1)    | 77(1)    | 17(1)    | 20(1)    | 24(1)    |
| O(7)  | 55(1)    | 51(1)    | 89(1)    | 20(1)    | 14(1)    | 26(1)    |
| N(1)  | 75(2)    | 84(2)    | 60(1)    | 12(1)    | 22(1)    | 36(1)    |
| C(1)  | 71(2)    | 69(2)    | 47(1)    | 16(1)    | 25(1)    | 32(1)    |
| C(2)  | 102(2)   | 98(2)    | 48(1)    | 29(1)    | 30(1)    | 41(2)    |
| C(3)  | 111(2)   | 76(2)    | 62(2)    | 36(1)    | 34(2)    | 36(2)    |
| C(4)  | 64(1)    | 61(1)    | 53(1)    | 24(1)    | 32(1)    | 32(1)    |
| C(5)  | 64(1)    | 54(1)    | 61(1)    | 22(1)    | 33(1)    | 25(1)    |
| C(6)  | 67(2)    | 96(2)    | 98(2)    | 34(2)    | 46(2)    | 25(2)    |
| C(7)  | 92(2)    | 56(1)    | 78(2)    | 30(1)    | 41(1)    | 34(1)    |
| C(8)  | 57(1)    | 42(1)    | 46(1)    | 15(1)    | 21(1)    | 25(1)    |
| C(9)  | 55(1)    | 44(1)    | 54(1)    | 17(1)    | 16(1)    | 22(1)    |
| C(10) | 71(2)    | 50(1)    | 46(1)    | 9(1)     | 16(1)    | 27(1)    |
| C(11) | 81(2)    | 53(1)    | 52(1)    | 19(1)    | 34(1)    | 37(1)    |
| C(12) | 60(1)    | 46(1)    | 58(1)    | 22(1)    | 28(1)    | 29(1)    |
| C(13) | 54(1)    | 42(1)    | 47(1)    | 13(1)    | 16(1)    | 21(1)    |
| C(14) | 68(2)    | 60(1)    | 78(2)    | 25(1)    | 39(1)    | 39(1)    |
| C(15) | 55(1)    | 64(1)    | 76(2)    | 28(1)    | 32(1)    | 32(1)    |
| C(16) | 52(1)    | 55(1)    | 56(1)    | 27(1)    | 24(1)    | 25(1)    |
| C(17) | 52(1)    | 68(1)    | 60(1)    | 30(1)    | 22(1)    | 26(1)    |
| C(18) | 52(1)    | 59(1)    | 53(1)    | 20(1)    | 15(1)    | 15(1)    |
| C(19) | 62(2)    | 48(1)    | 55(1)    | 22(1)    | 20(1)    | 20(1)    |
| C(20) | 53(1)    | 50(1)    | 59(1)    | 27(1)    | 22(1)    | 23(1)    |
| C(21) | 49(1)    | 48(1)    | 60(1)    | 22(1)    | 18(1)    | 17(1)    |
| C(22) | 68(2)    | 59(1)    | 73(2)    | 14(1)    | 1(1)     | 12(1)    |

|       |        |        |        |       |       |       |
|-------|--------|--------|--------|-------|-------|-------|
| C(23) | 56(2)  | 108(2) | 102(2) | 4(2)  | 7(2)  | 19(2) |
| C(24) | 130(3) | 84(2)  | 97(2)  | 23(2) | 60(2) | 46(2) |
| C(25) | 50(1)  | 66(1)  | 87(2)  | 25(1) | 20(1) | 26(1) |

---

# Mass Spectrum of Compound 45

C:\Xcalibur\MTM-V-30\_130210195851

2/10/2013 7:58:51 PM

MTM-V-30

MTM-V-30\_130210195851#9 RT: 0.07 AV: 1 NL: 1.29E7  
T: FTMS + p ESI Full ms [200.00-2000.00]

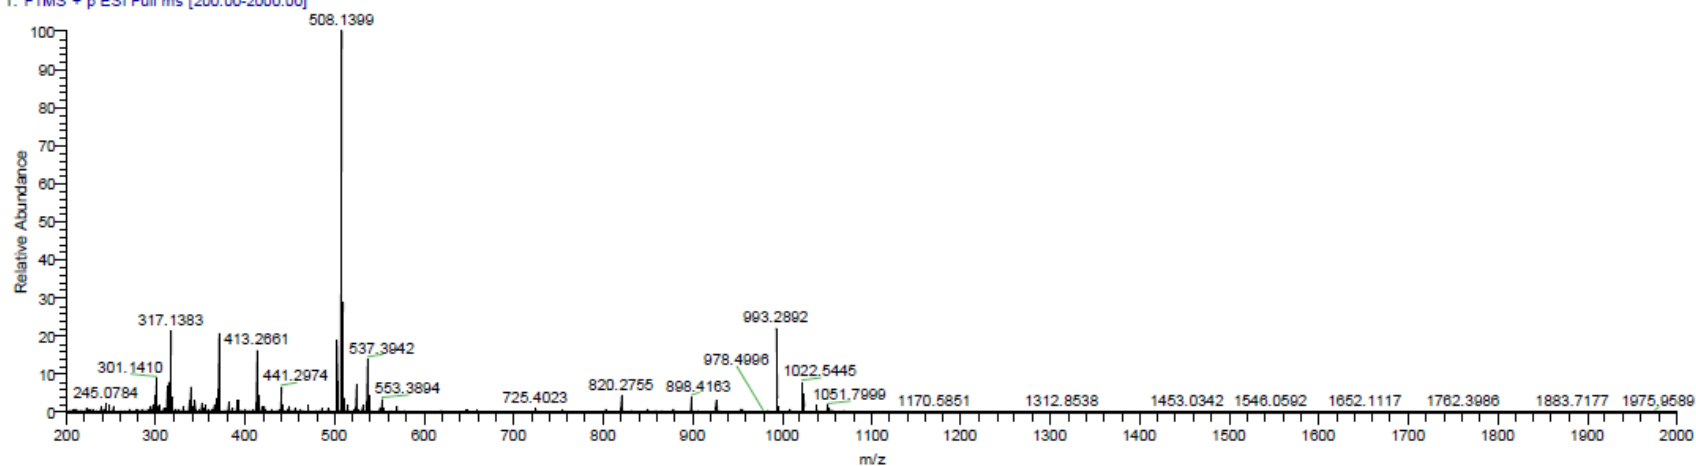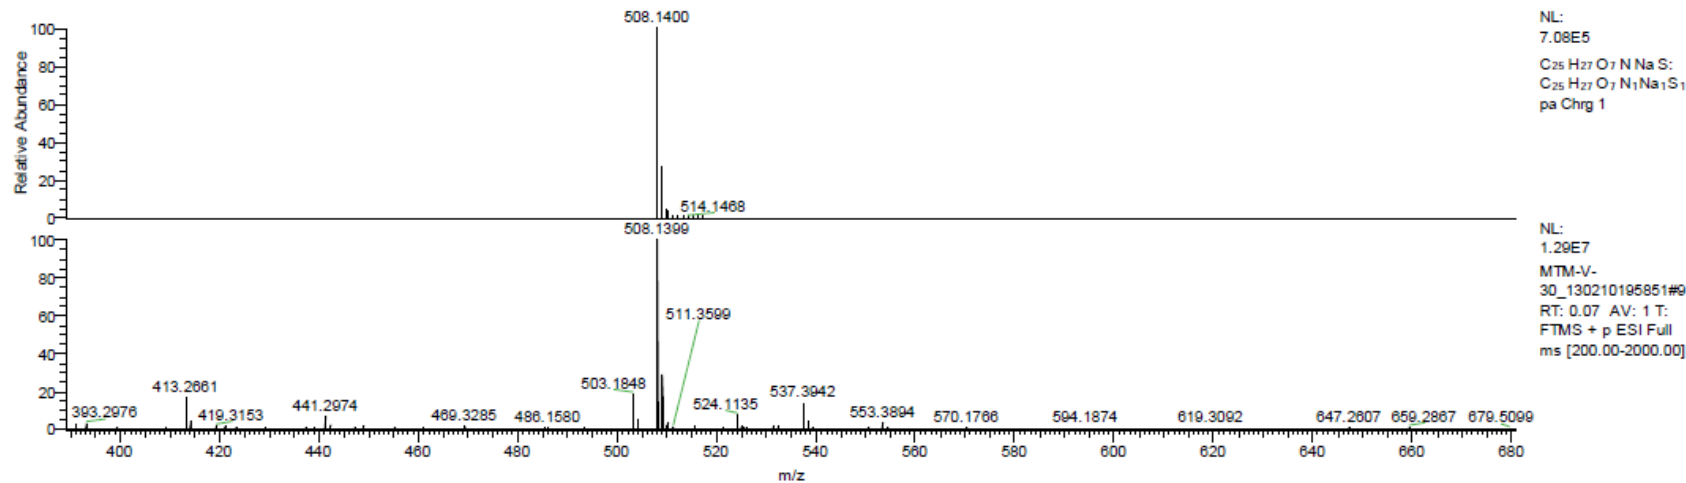

## NADPH Cytochrome P450 Oxidoreductase Cleavage Assay

HPLC Conditions:

Solvent: 55% Acetonitrile/water isocratic; detection wavelength: 300 nm; flow rate: 1 mL/min.

**Chromatogram of 100  $\mu$ M CA-4**

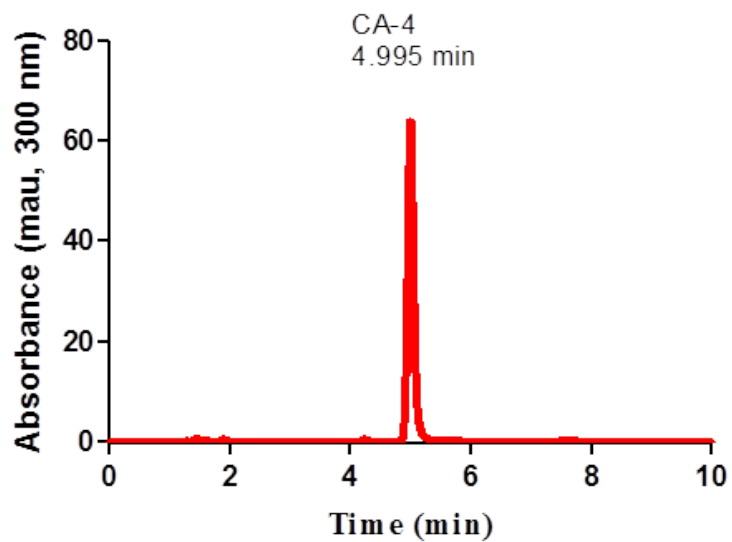

**Chromatogram of 100  $\mu$ M CA-1**

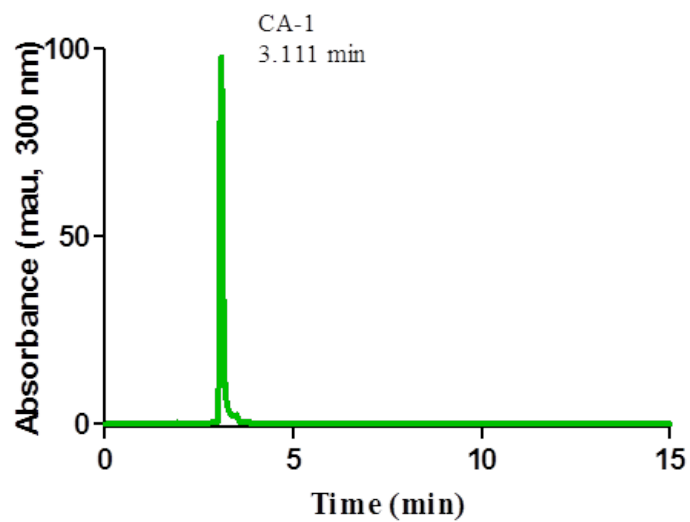

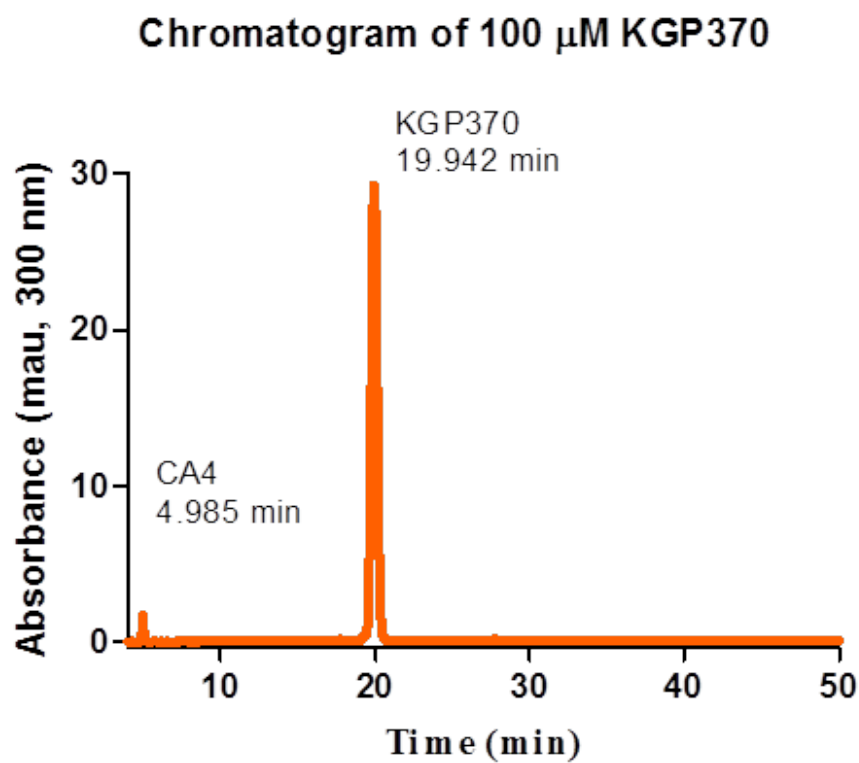

**Chromatogram of KGP370 in buffer (+ 0.1% Triton X-100) for 90 min**

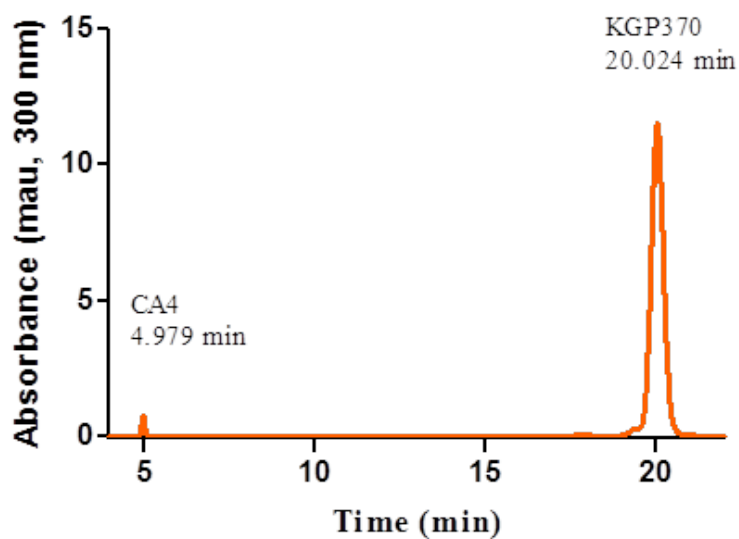

NOTE: KGP370 in the HPLC traces refers to compound **43** in the manuscript.

### Chromatogram of POR-Treated KGP370 for 90 min

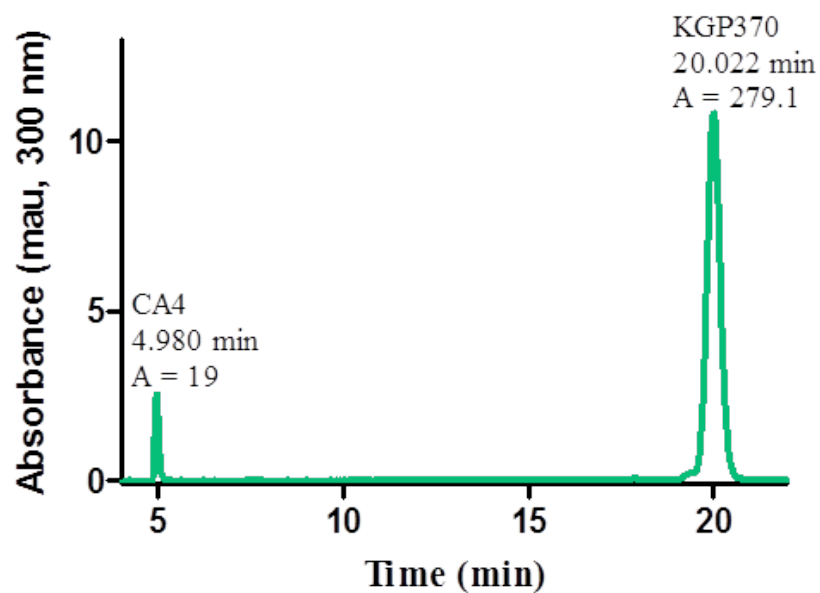

### Chromatogram of 100 $\mu$ M KGP371

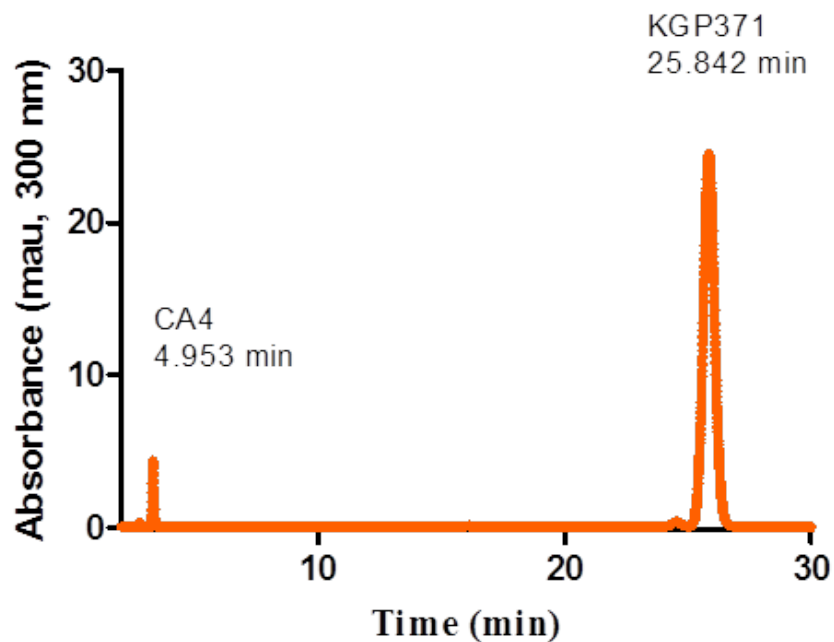

NOTE: KGP370 in the HPLC traces refers to compound **43** in the manuscript. KGP371 in the HPLC traces refers to compound **44** in the manuscript.

Chromatogram of KGP371 in buffer for 90 min (Control)

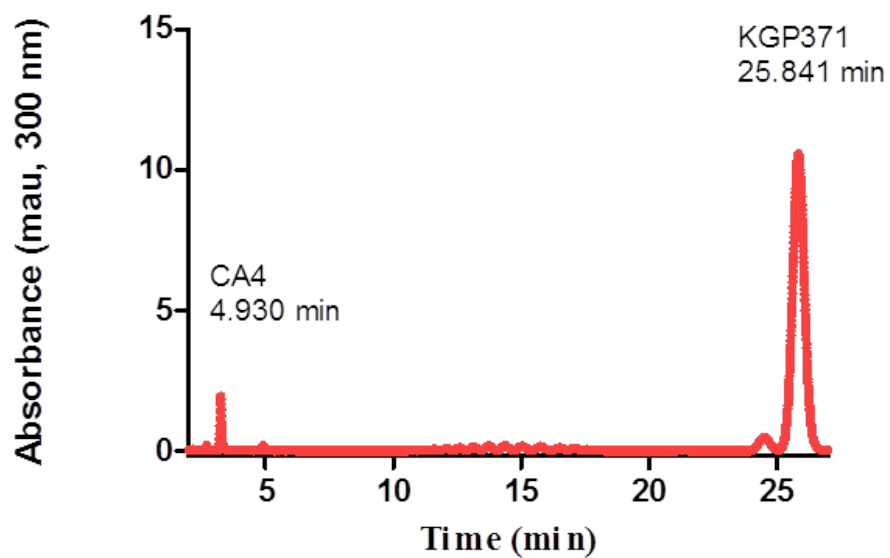

Chromatogram of POR-Treated KGP371 for 90 min

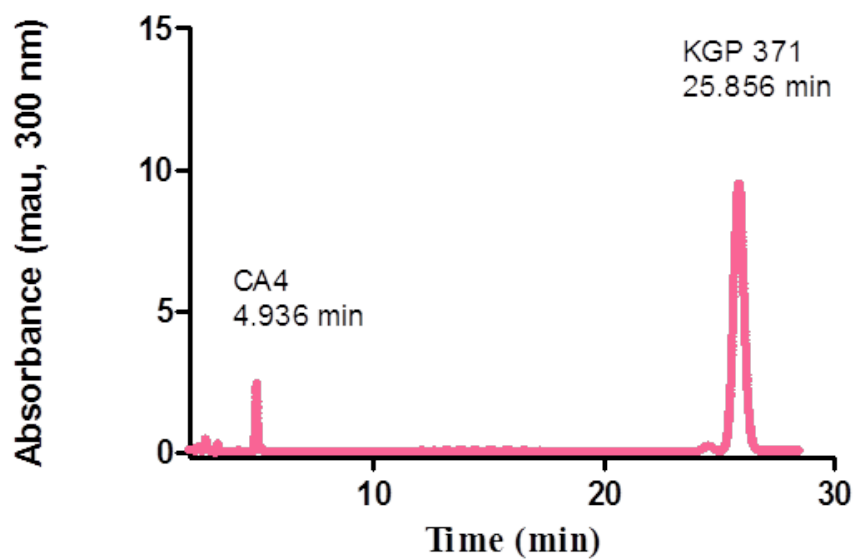

NOTE: KGP371 in the HPLC traces refers to compound **44** in the manuscript.

### Chromatogram of 100 $\mu$ M KGP372

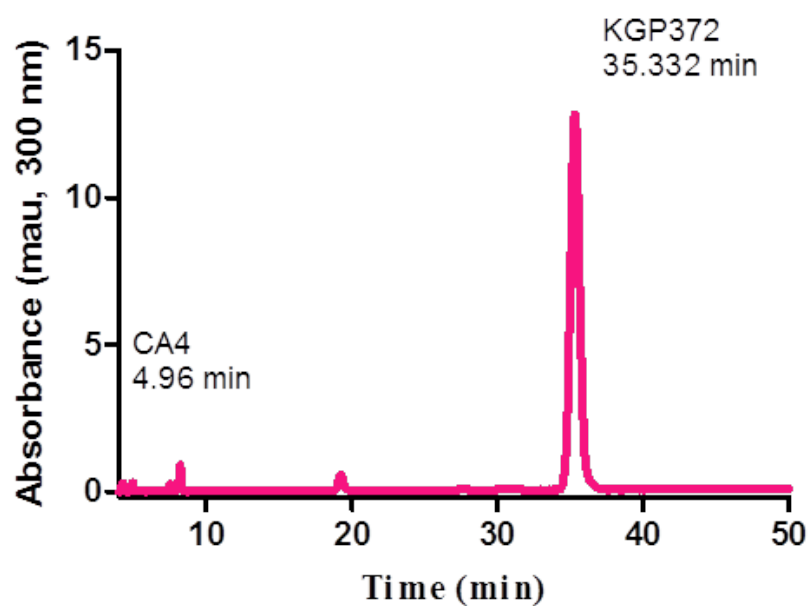

### Chromatogram of KGP372 in buffer (+ 0.1% Triton X-100) for 90 min

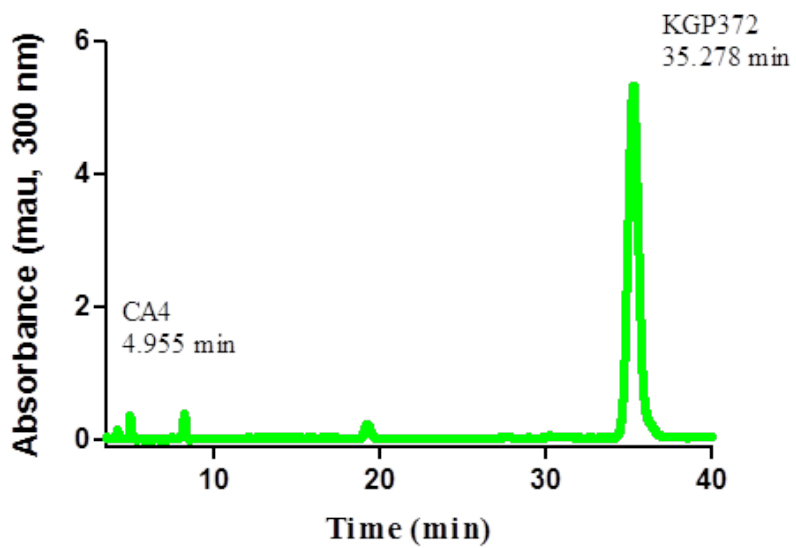

NOTE: KGP372 in the HPLC traces refers to compound **45** in the manuscript.

### Chromatogram of POR-Treated KGP372 for 90 min

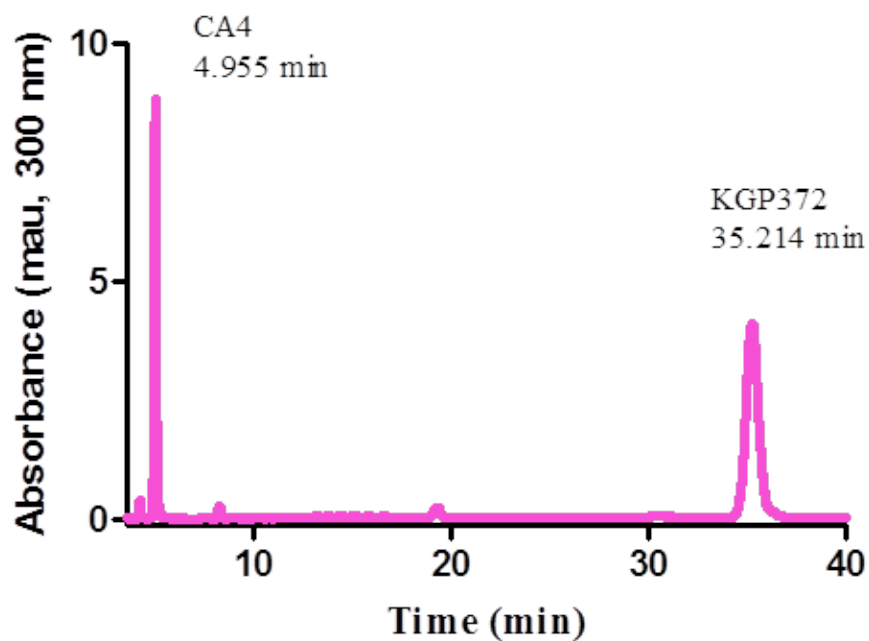

### Chromatogram of 100 $\mu$ M KGP400

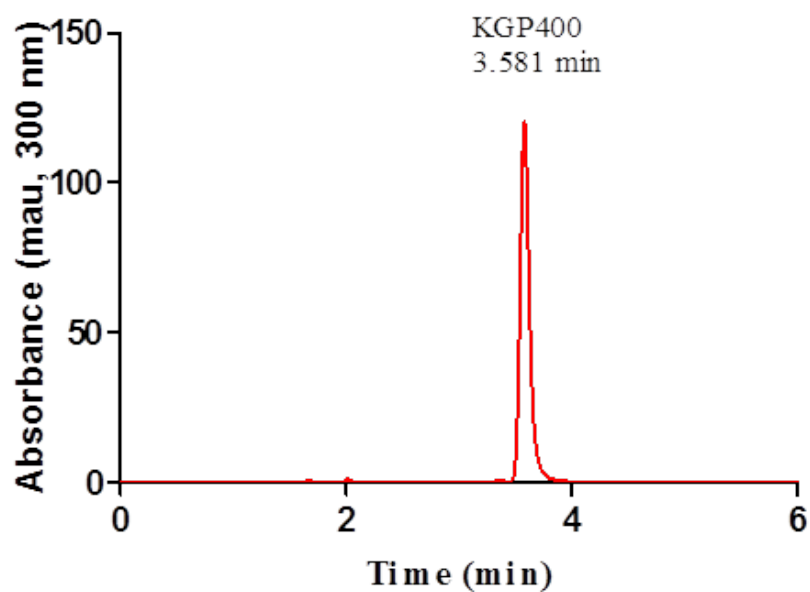

NOTE: KGP372 in the HPLC traces refers to compound **45** in the manuscript. KGP400 in the HPLC traces refers to compound **21** in the manuscript.

Chromatogram of 100  $\mu$ M KGP439

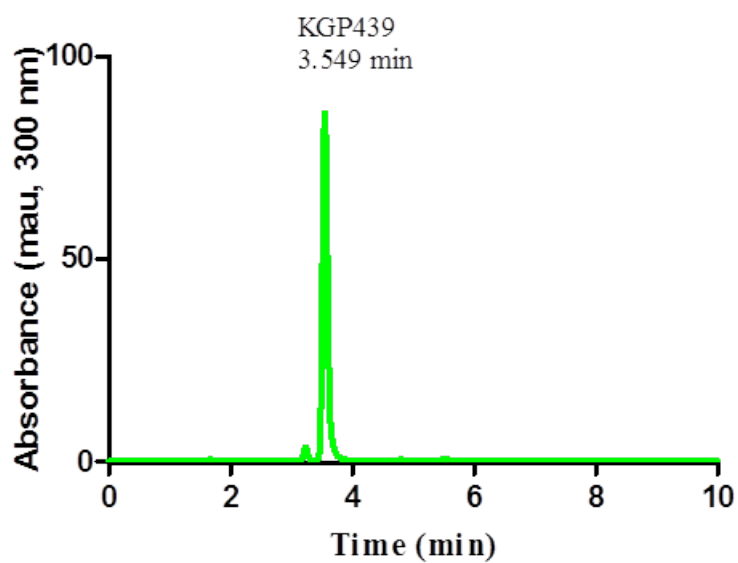

Chromatogram of 100  $\mu$ M KGP440

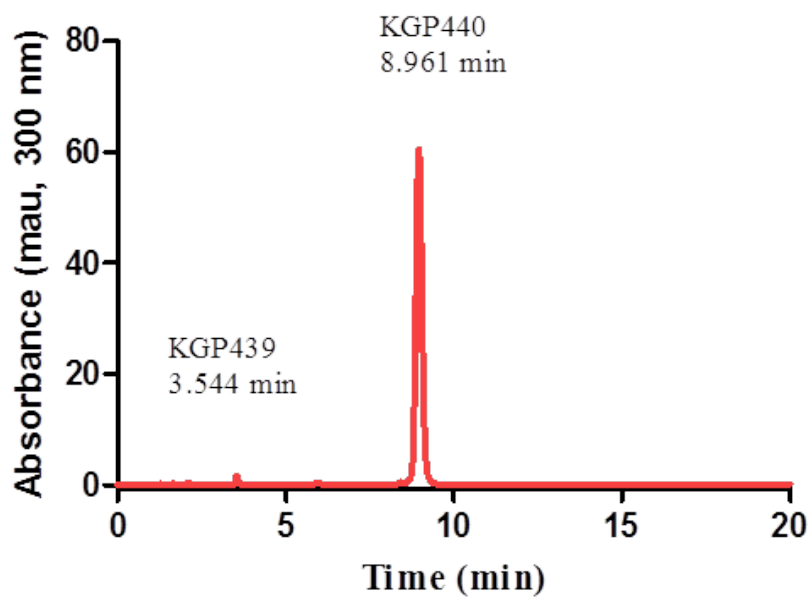

NOTE: KGP439 in the HPLC traces refers to compound **20** in the manuscript. KGP440 in the HPLC traces refers to compound **22** in the manuscript.

Chromatogram of KGP440 in buffer (approx 50  $\mu$ M, + 0.1% Triton X-100) for 90 min

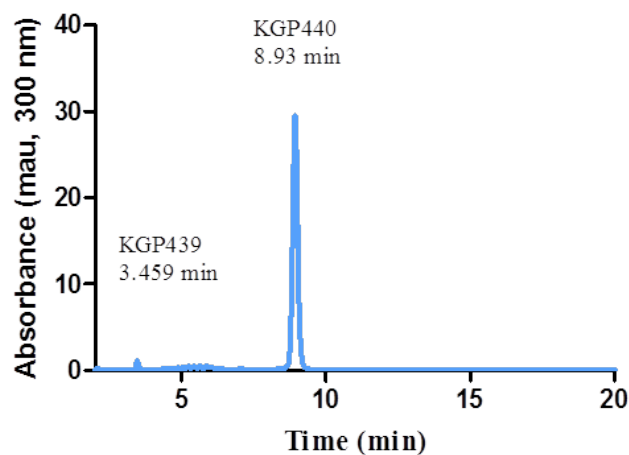

Chromatogram of POR-Treated KGP440 for 90 min

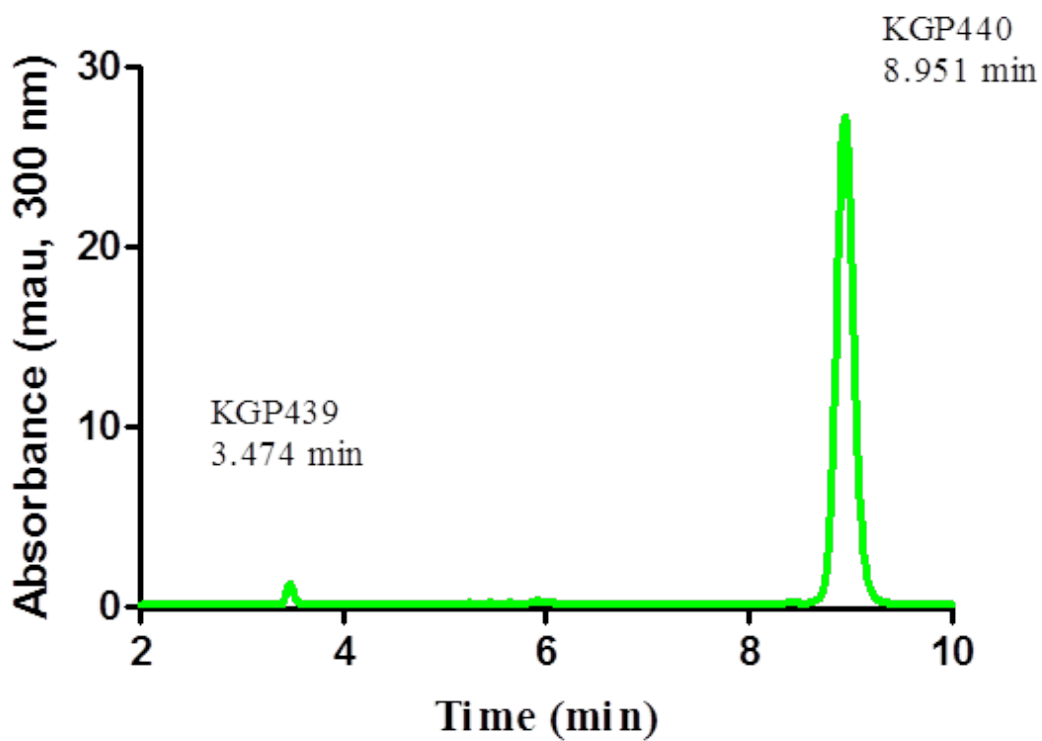

Note: KGP440 in the HPLC traces refers to compound **22** in the manuscript.

### Chromatogram of 100 $\mu$ M KGP441

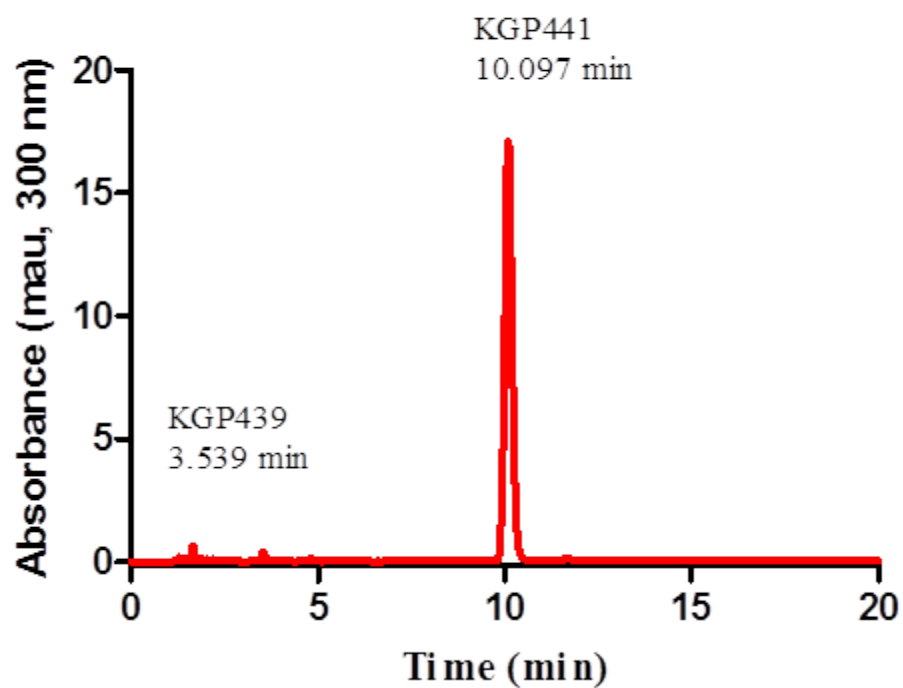

### Chromatogram of KGP441 in buffer (approx 50 $\mu$ M, + 0.1% Triton X-100) for 90 min

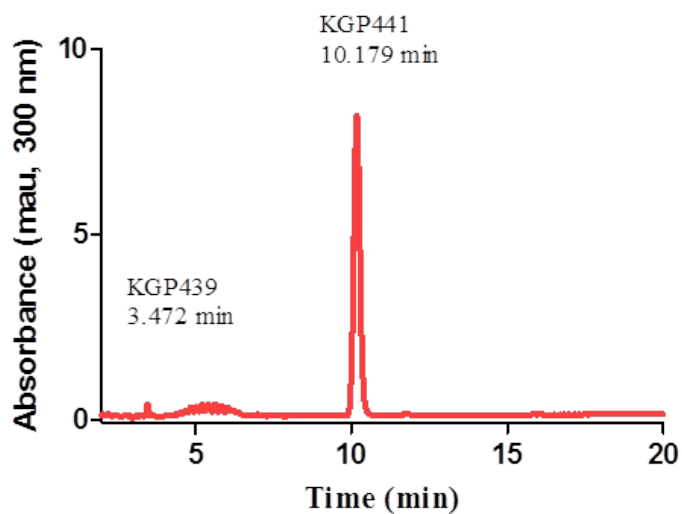

NOTE: KGP441 in the HPLC traces refers to compound **23** in the manuscript.

### Chromatogram of POR-Treated KGP441 for 90 min

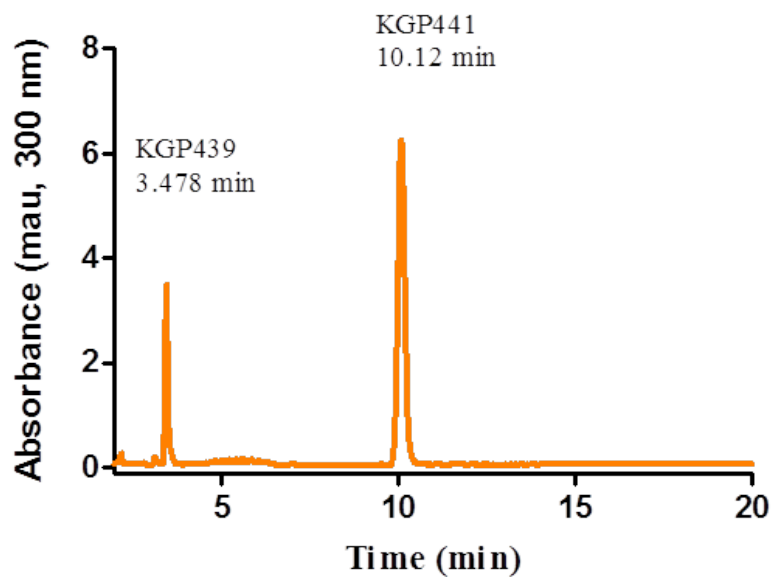

### Chromatogram of 100 $\mu$ M KGP442

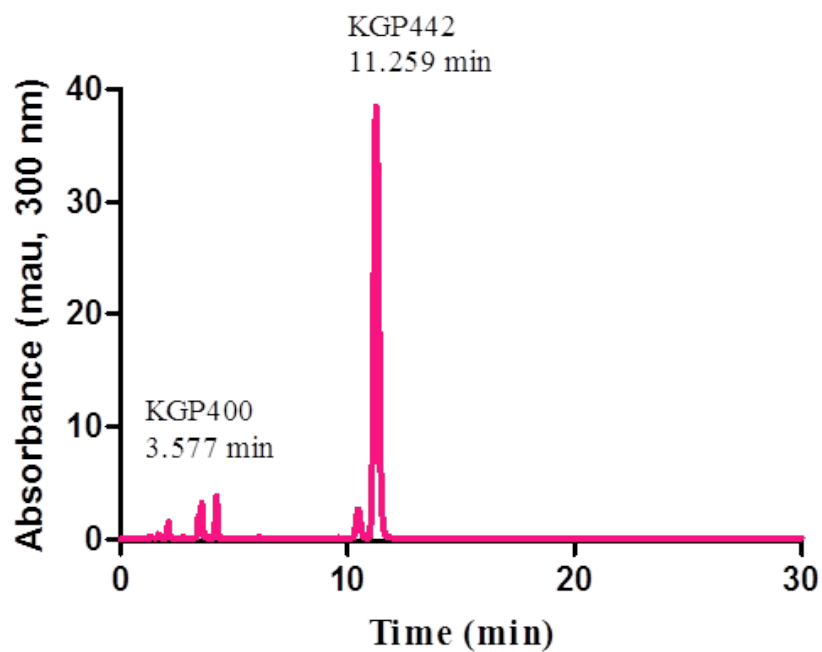

NOTE: KGP441 in the HPLC traces refers to compound **23** in the manuscript. KGP442 in the HPLC traces refers to compound **24** in the manuscript.

Chromatogram of KGP442 in buffer (+ 0.1% Triton X-100) for 90 min

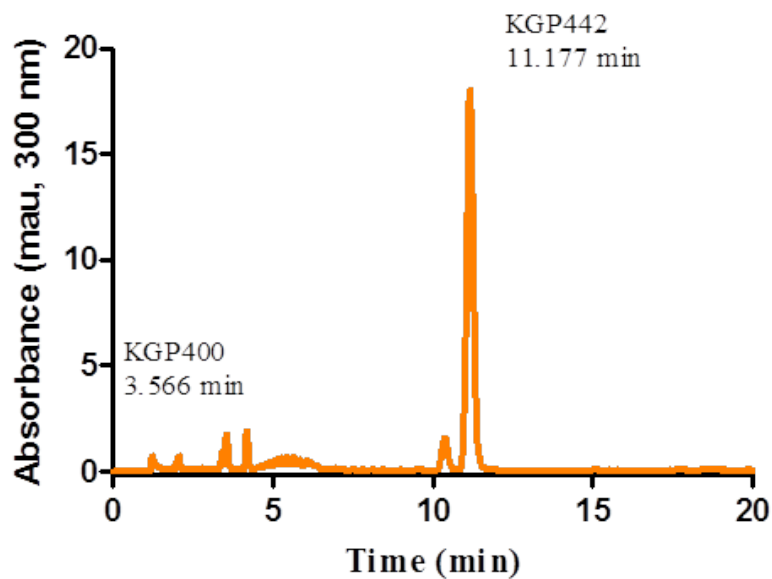

Chromatogram of POR-Treated KGP442 for 90 min

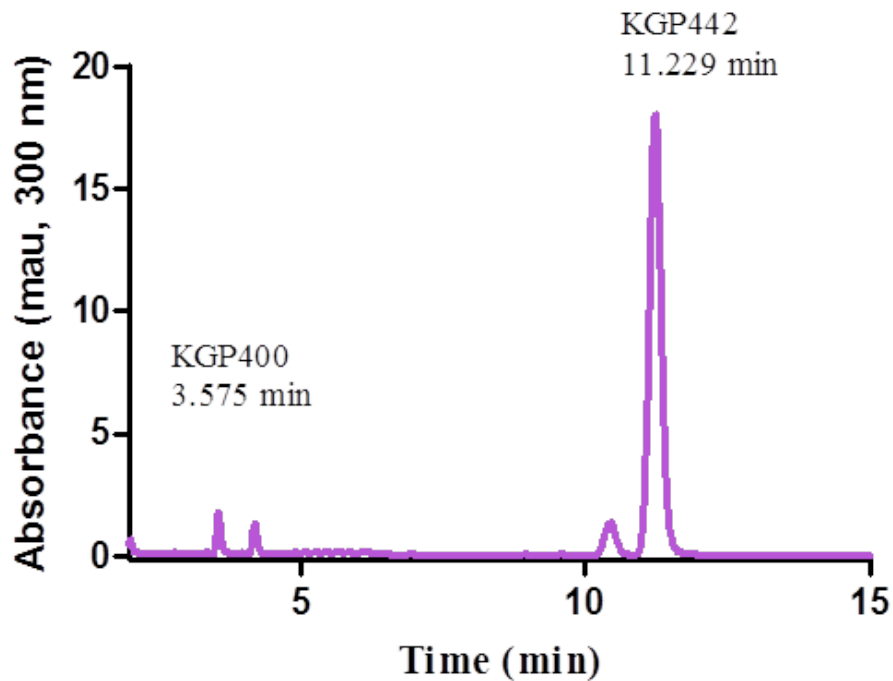

NOTE: KGP442 in the HPLC traces refers to compound **24** in the manuscript.

### Chromatogram of 100 $\mu$ M KGP443

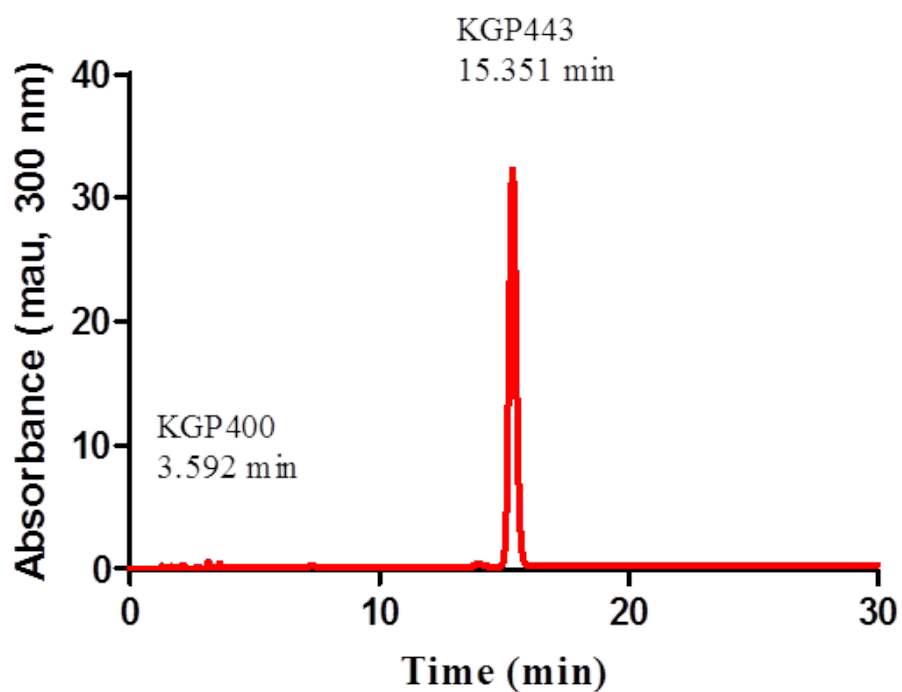

### Chromatogram of KGP443 in buffer (+ 0.1% Triton X-100) for 90 min

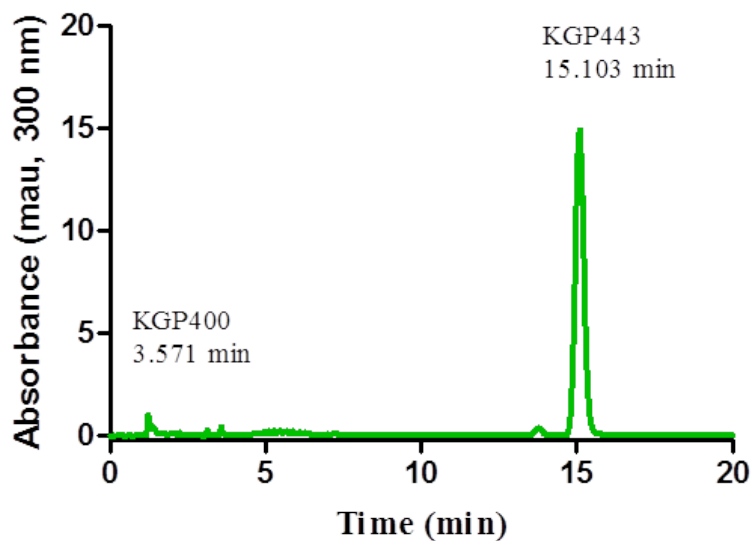

NOTE: KGP443 in the HPLC traces refers to compound **25** in the manuscript.

### Chromatogram of POR-Treated KGP443 for 90 min

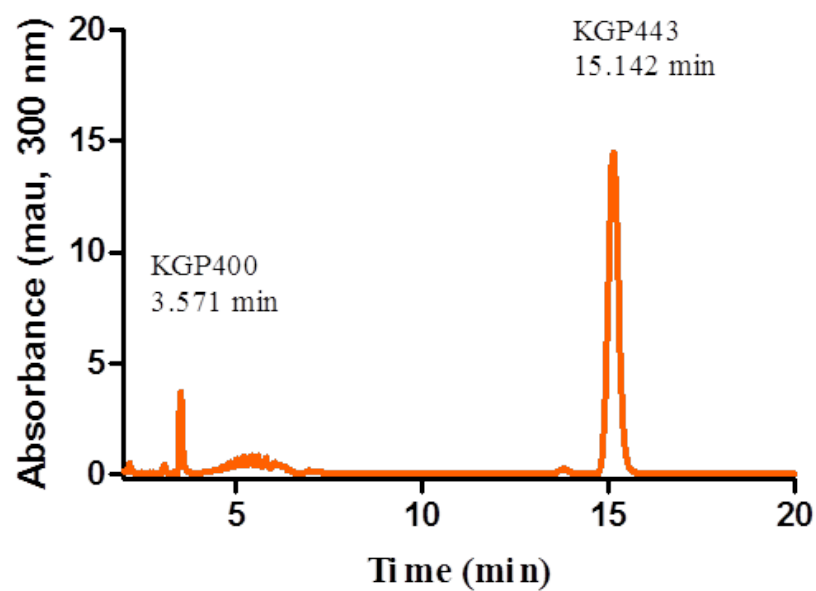

### Chromatogram of 100 $\mu$ M KGP444

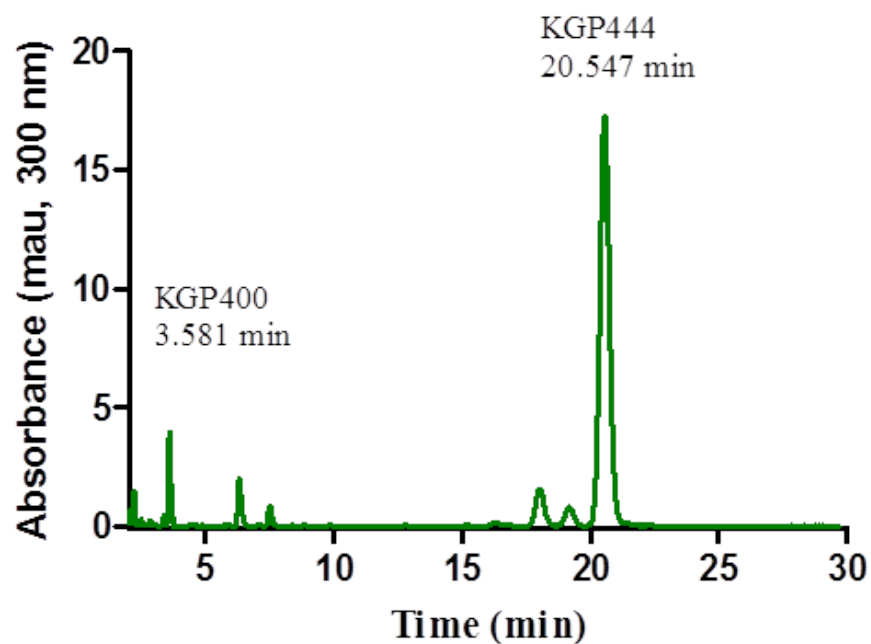

NOTE: KGP443 in the HPLC traces refers to compound **25** in the manuscript. KGP444 in the HPLC traces refers to compound **26** in the manuscript.

Chromatogram of KGP444 in buffer (+ 0.1% Triton X-100) for 90 min

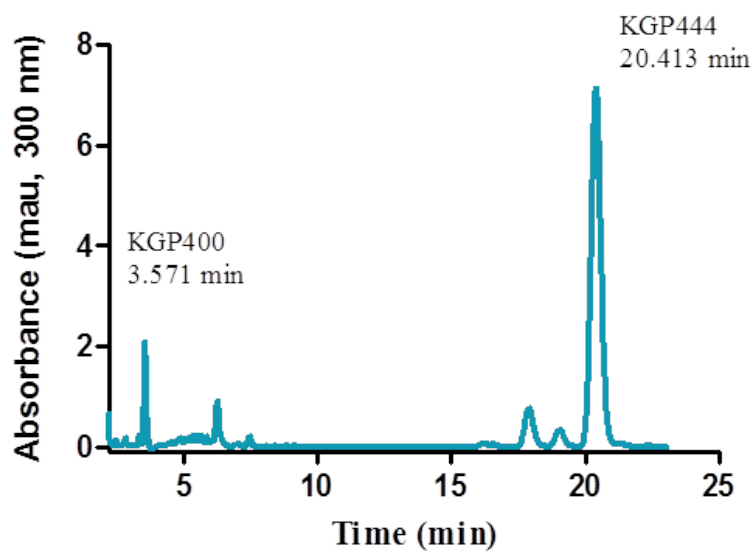

Chromatogram of POR-Treated KGP444 for 90 min

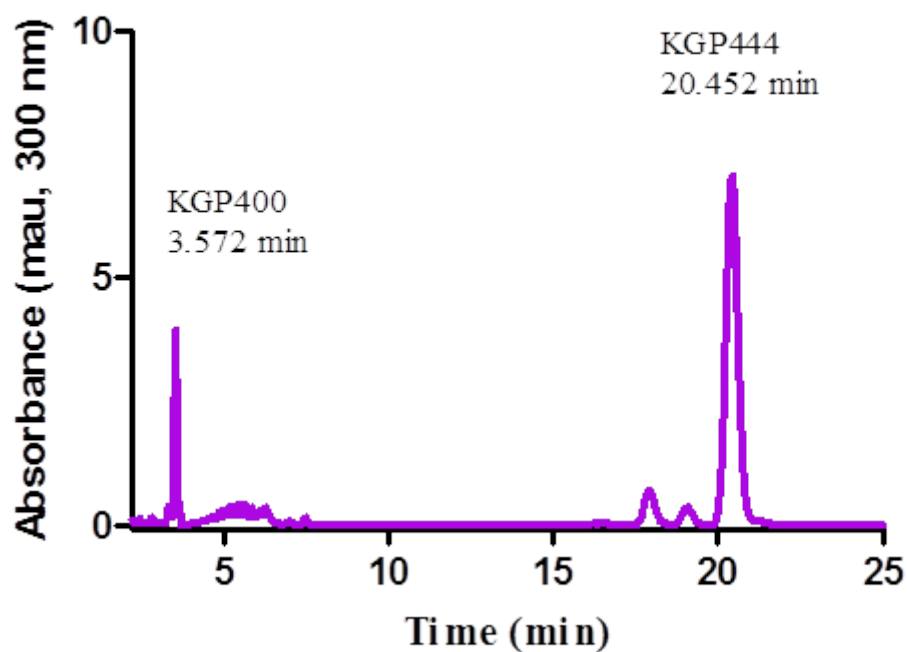

NOTE: KGP444 in the HPLC traces refers to compound **26** in the manuscript.

### Chromatogram of 100 $\mu$ M KGP445

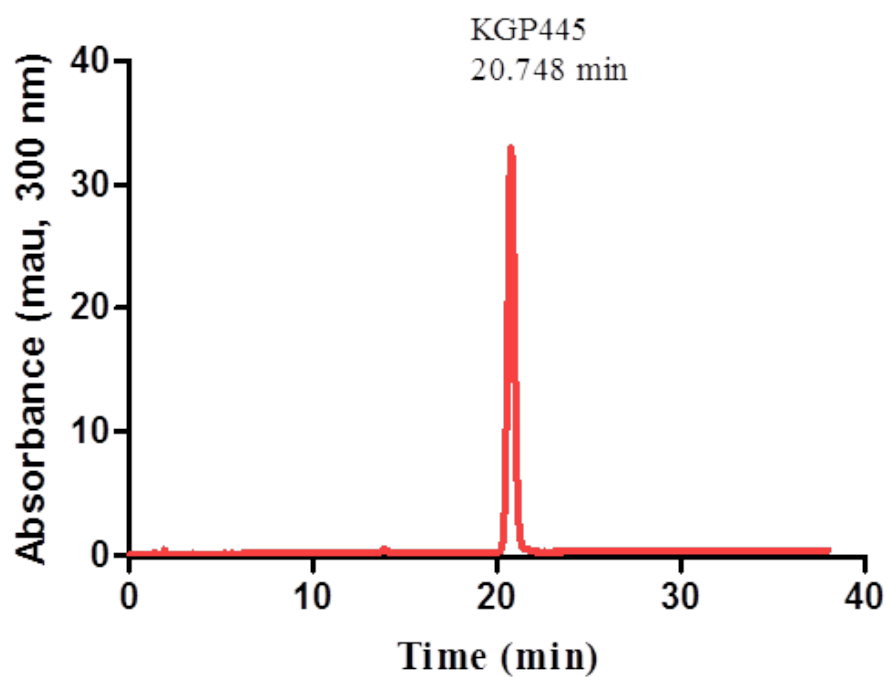

### Chromatogram of KGP445 in buffer (+ 0.1% Triton X-100) for 90 min

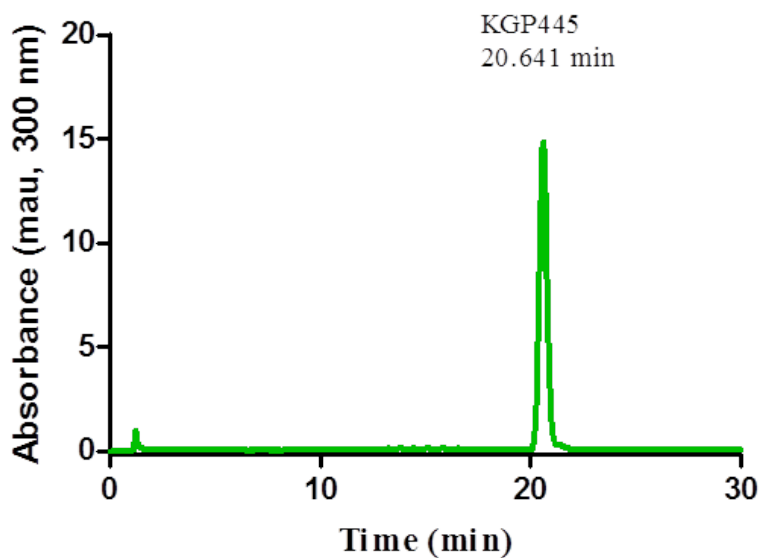

NOTE: KGP445 in the HPLC traces refers to compound **35** in the manuscript.

### Chromatogram of POR-Treated KGP445 for 90 min

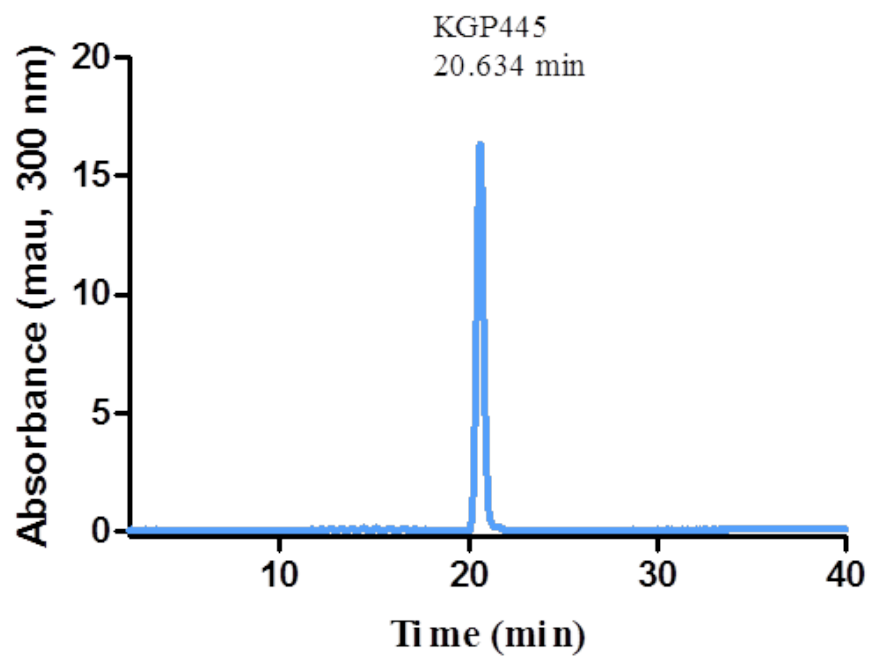

### Chromatogram of 100 $\mu$ M KGP446

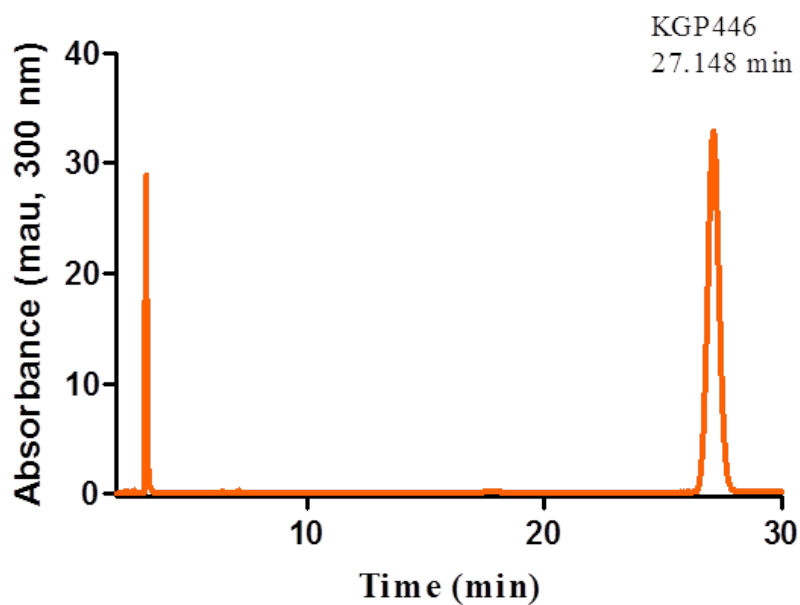

NOTE: KGP445 in the HPLC traces refers to compound **35** in the manuscript. KGP446 in the HPLC traces refers to compound **36** in the manuscript.

Chromatogram of KGP446 in buffer (+ 0.1% Triton X-100) for 90 min

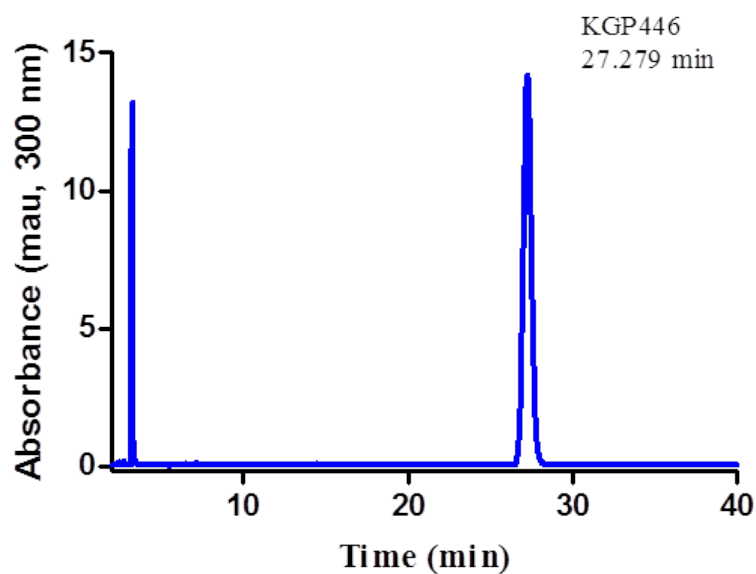

Chromatogram of POR-Treated KGP446 for 90 min

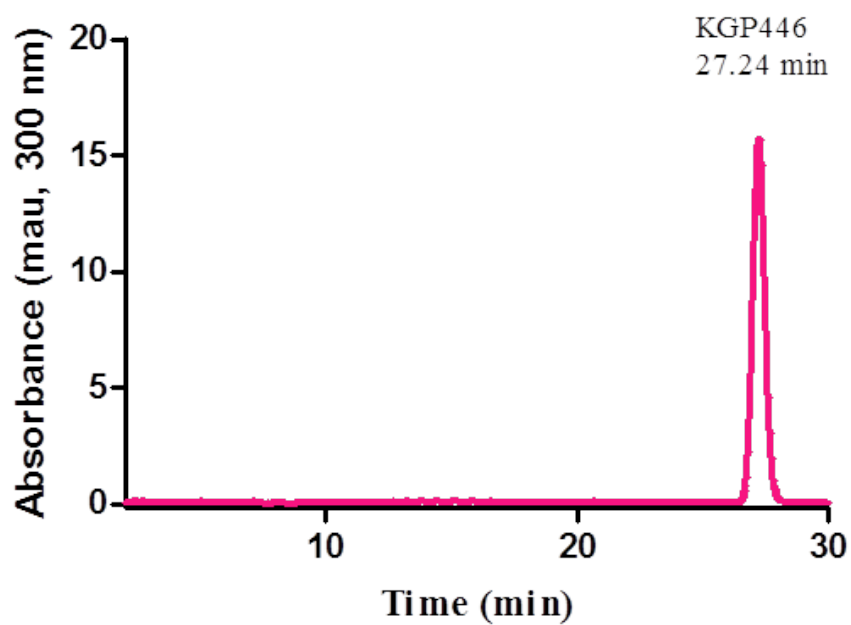

NOTE: KGP446 in the HPLC traces refers to compound **36** in the manuscript.

### Chromatogram of 50 $\mu$ M KGP454

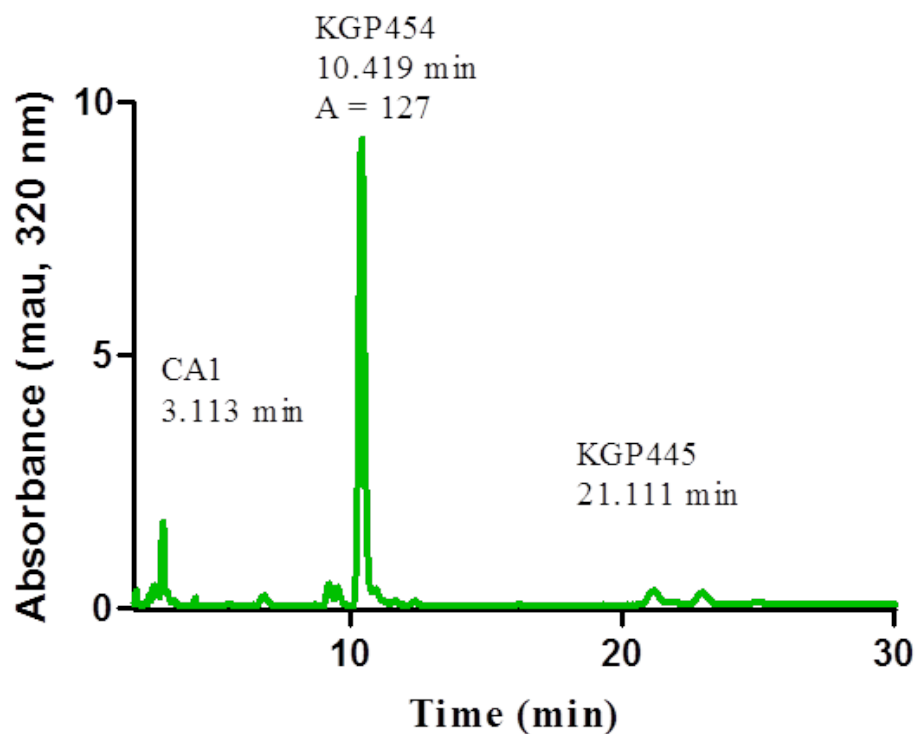

### Chromatogram of KGP454 in buffer (approx 50 $\mu$ M, + 0.1% Triton X-100) for 90 min

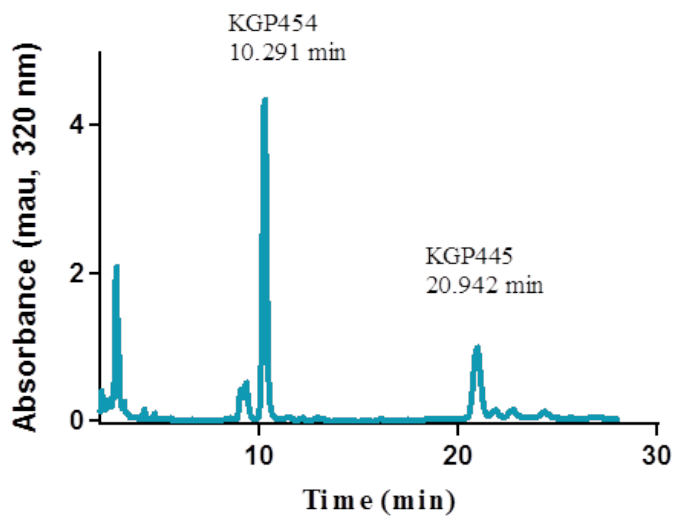

NOTE: KGP454 in the HPLC traces refers to compound **39** in the manuscript. KGP445 in the HPLC traces refers to compound **35** in the manuscript.

## Chromatogram of POR-Treated KGP454 for 90 min

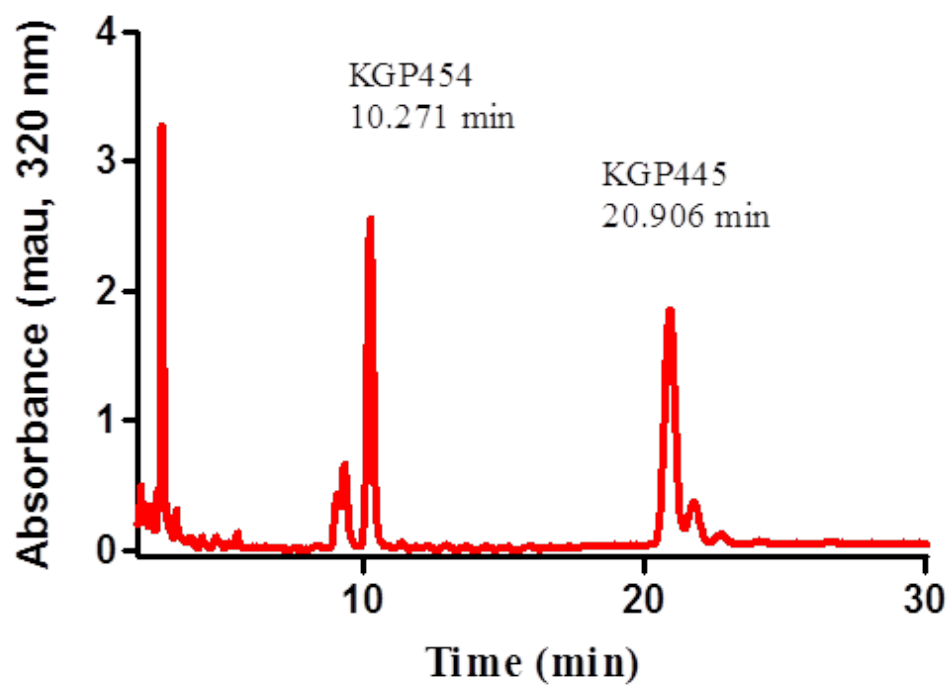

NOTE: KGP454 in the HPLC traces refers to compound **39** in the manuscript. KGP445 in the HPLC traces refers to compound **35** in the manuscript.

## Chromatogram of 100 $\mu$ M KGP455

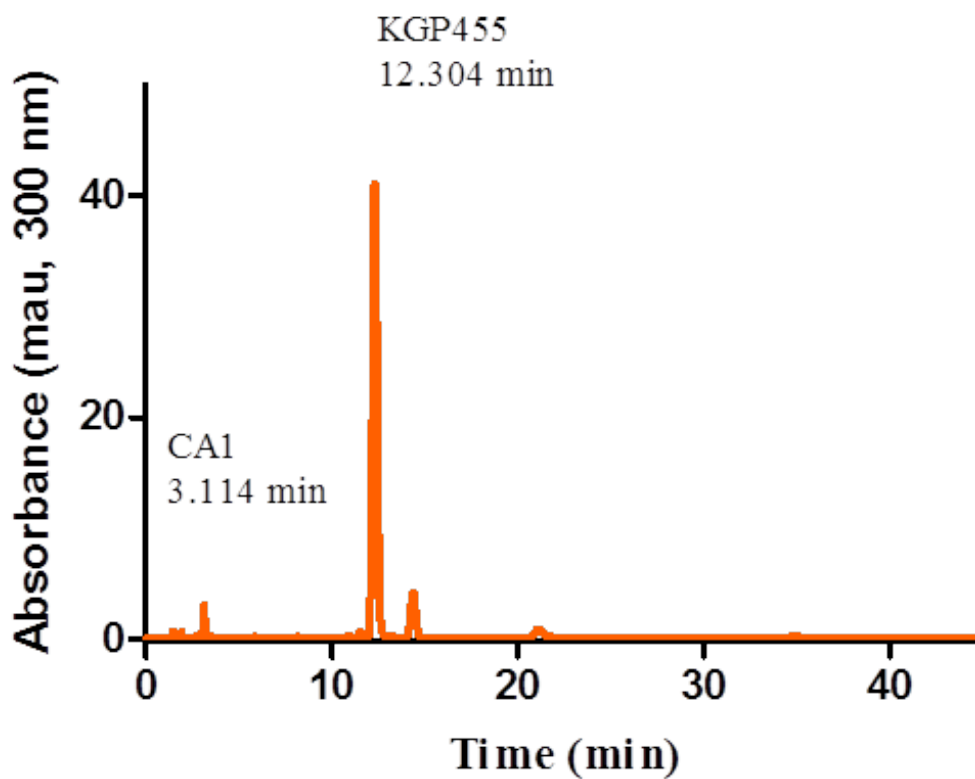

## Chromatogram of POR-Treated KGP455 for 90 min

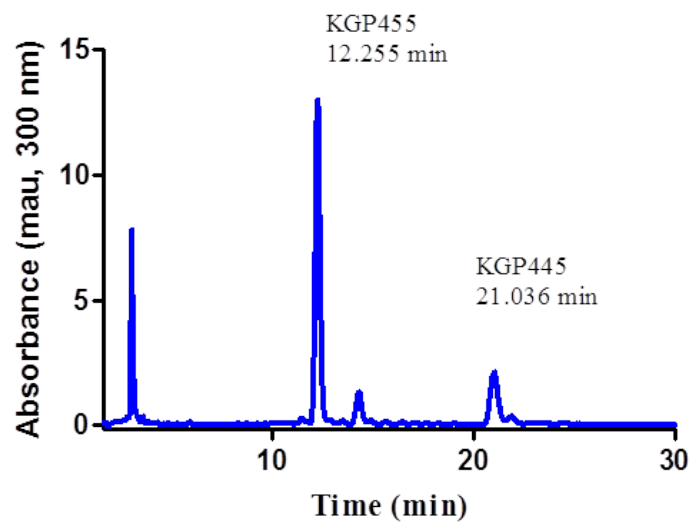

NOTE: KGP455 in the HPLC traces refers to compound **37** in the manuscript. KGP445 in the HPLC traces refers to compound **35** in the manuscript.

Chromatogram of 100  $\mu$ M KGP456

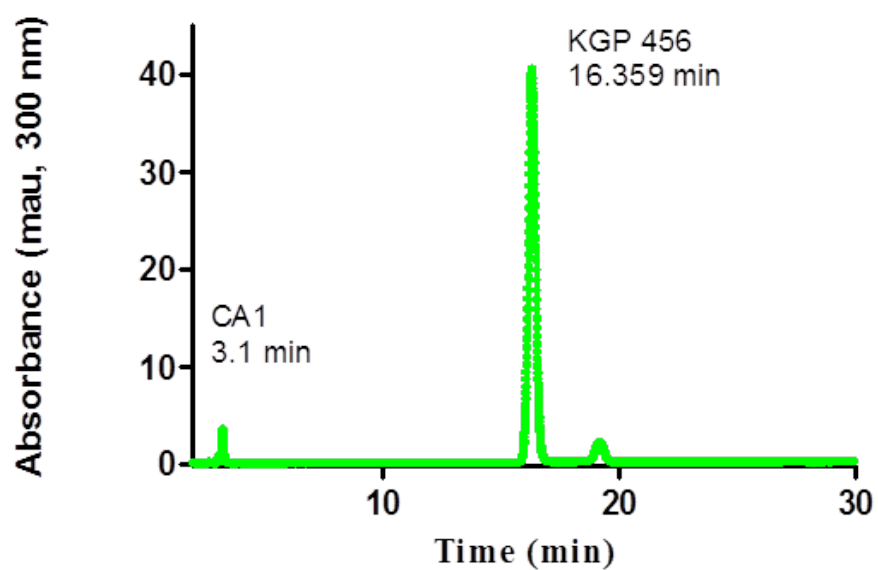

Chromatogram of KGP456 in buffer for 90 min (Control)

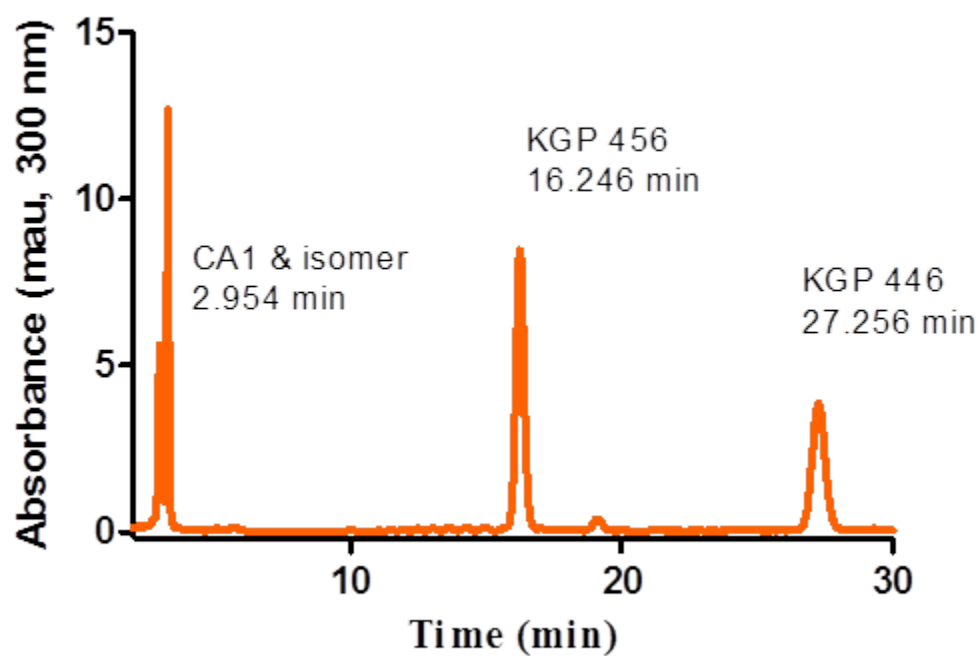

NOTE: KGP456 in the HPLC traces refers to compound **40** in the manuscript. KGP446 in the HPLC traces refers to compound **36** in the manuscript.

### Chromatogram of POR-Treated KGP456 for 90 min

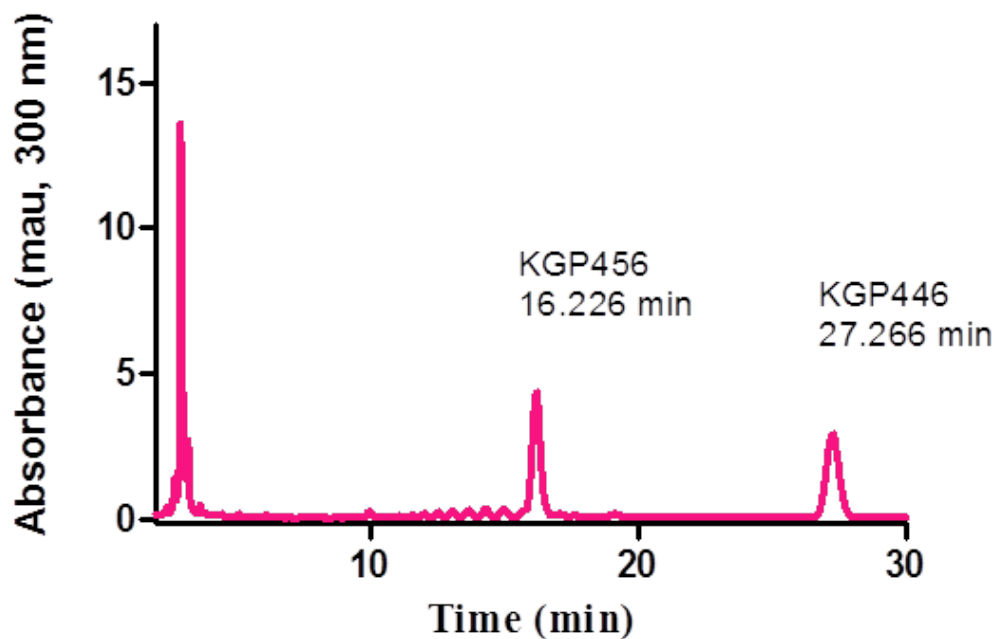

### Chromatogram of 100 $\mu$ M KGP457

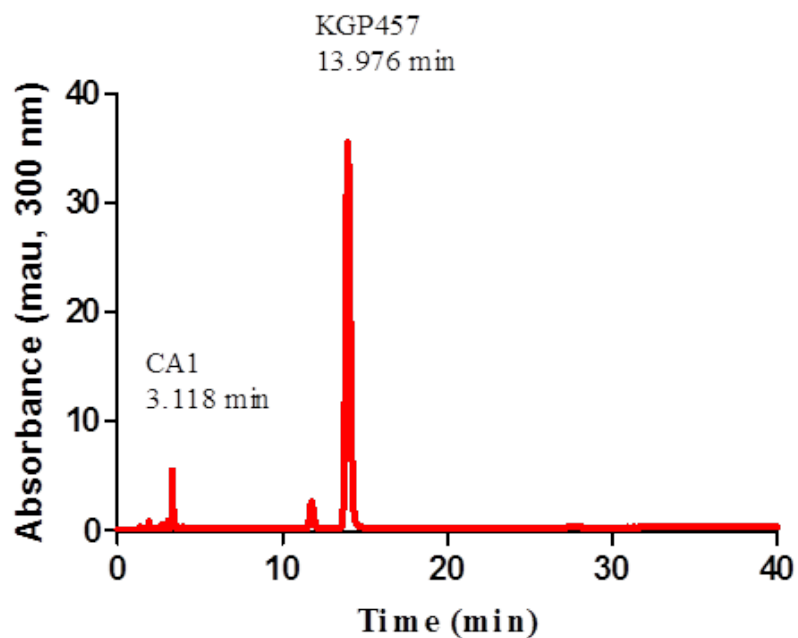

NOTE: KGP456 in the HPLC traces refers to compound **40** in the manuscript. KGP446 in the HPLC traces refers to compound **36** in the manuscript. KGP457 in the HPLC traces refers to compound **38** in the manuscript.

### Chromatogram of POR-Treated KGP457 for 90 min

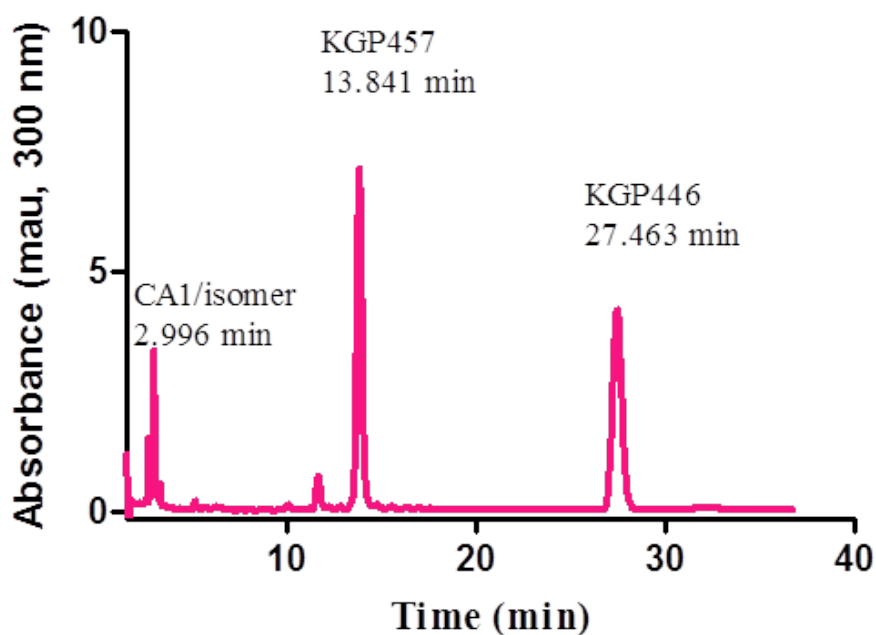

### Chromatogram of 50 $\mu$ M KGP461

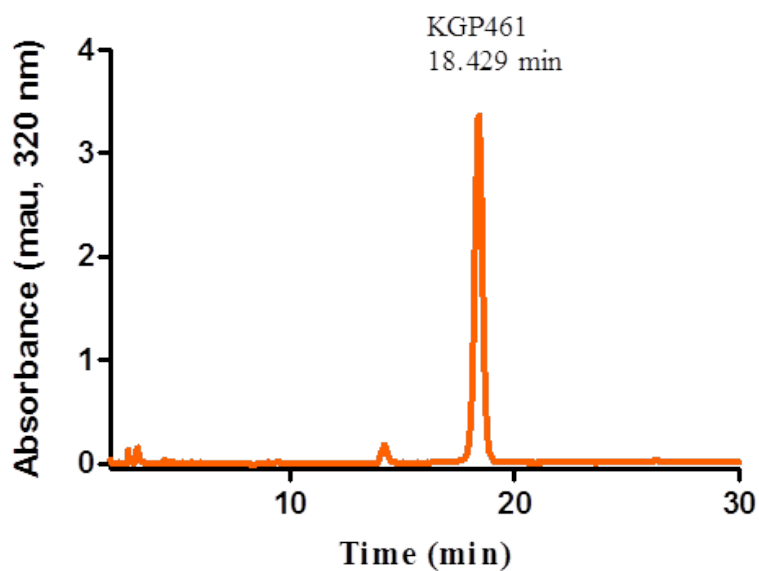

NOTE: KGP446 in the HPLC traces refers to compound **36** in the manuscript. KGP457 in the HPLC traces refers to compound **38** in the manuscript. KGP461 in the HPLC traces refers to compound **41** in the manuscript.

### Chromatogram of POR-Treated KGP461 for 90 min

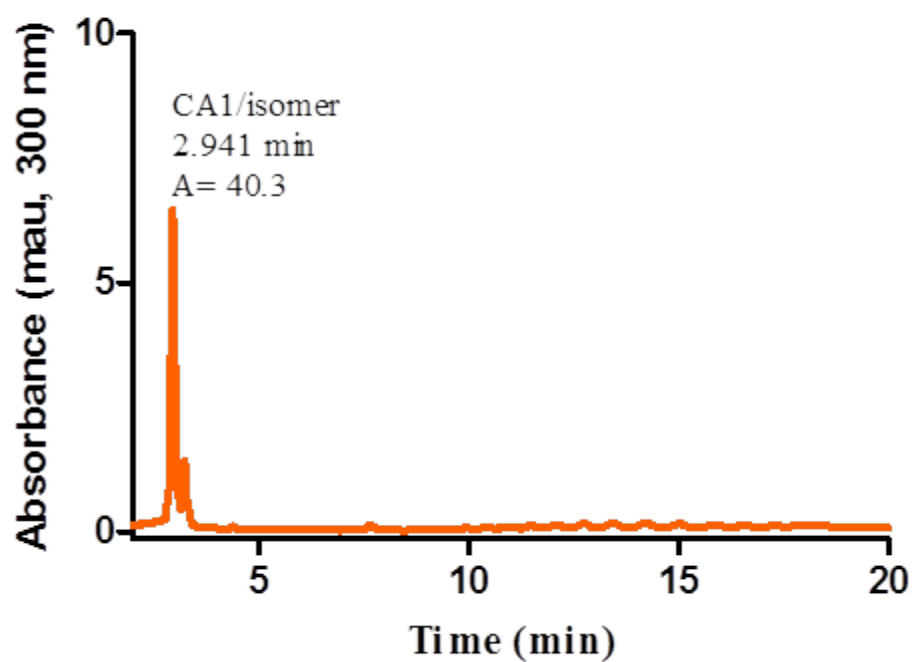

NOTE: KGP461 in the HPLC traces refers to compound **41** in the manuscript.

### NOE Spectra Analysis for Compounds **37**, **38** and **41**

To determine the regioselectivity of the TBS deprotection step, Mitsunabu reactions to install trigger (nitrothiophene group) in the TBS deprotected compounds (Scheme 4), we did NOE study of three final compounds **37**, **38** and **41** (Scheme 6) to determine the connectivity of the trigger to the molecules and regioselectivity of the reactions.

NOE spectra of compound **37**: Structure of compound **37** (established after NOE study) with important NOE interaction has been shown in page 202. We were looking for positive NOE bridge alkene protons A2 and benzylic protons B1 (protons are assigned arbitrarily with A, B, T etc) and between benzylic protons B1 and methoxy M2 protons. Positive NOE and negative or no NOE have been shown in blue and red colors double headed arrows respectively. Theoretically if the nitrothiophene trigger is connected to hydroxyl group next to methoxy group (M2), in NOE spectra there should be positive NOE between B1 protons and M2 protons. Similarly positive NOE should be observed between A2 and B1 protons if the trigger is connected to hydroxyl group close to bridge alkene protons A2. In the actual NOE study when M2 protons were irradiated, only one positive NOE was observed for P proton (red color spectra in page 202). No positive NOEs were observed for B1 or T1 protons. But when B1 protons were irradiated, positive NOEs were observed only for A2 protons and T1 proton (blue spectra in page 202). Therefore, this NOE study confirms the structure of **37**.

NOE spectra of compound **38**: NOE spectra of compound **38** has been shown in page 203. When compound **38**, G1 protons were irradiated, positive NOE were observed for A1 protons, B and T protons (red spectra). On irradiation of B proton positive NOE were observed for A1, G1 and T protons (green spectra). This NOE spectra thus clearly established the structure of compound **38**.

NOE Spectra of Compound **41**: NOE spectra of compound **41** has been shown in page 204. Irradiation of both A protons produced positive NOE for G protons (purple and green spectra). But when M protons was irradiated no positive NOE was observed for G protons. This clearly indicated that nitrophenyl trigger is connected to the hydroxyl group closer to the bridge alkene protons (or second from the methoxy group).

## NOE Spectra for Compound **37**

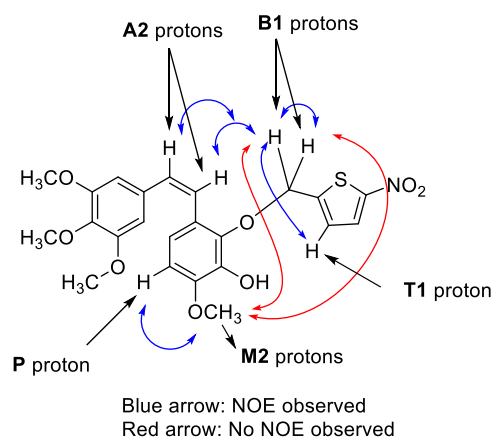

**37**

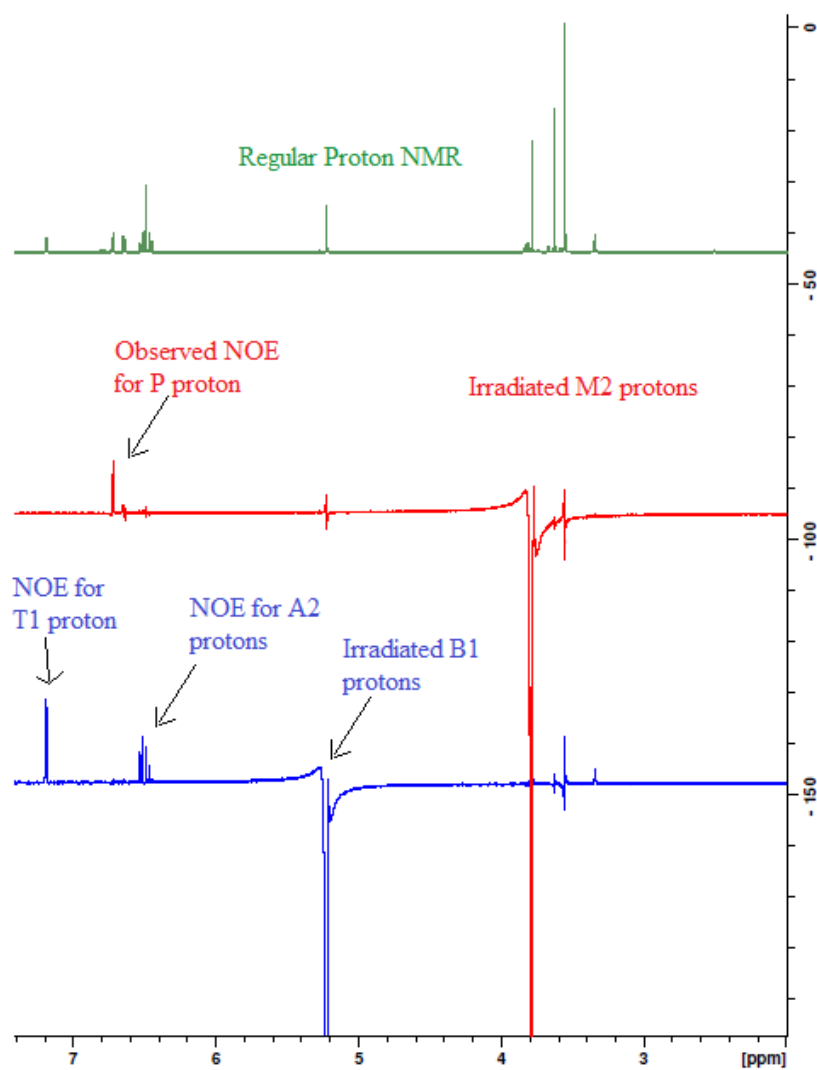

# NOE for Compound **38**

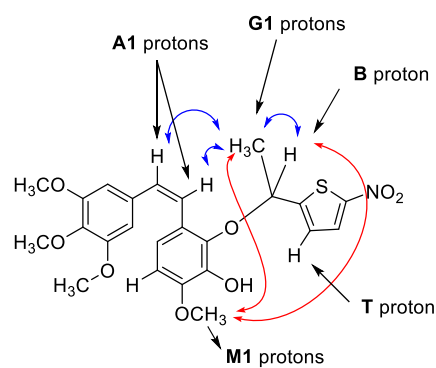

Blue arrow: NOE observed  
Red arrow: No NOE observed

**38**

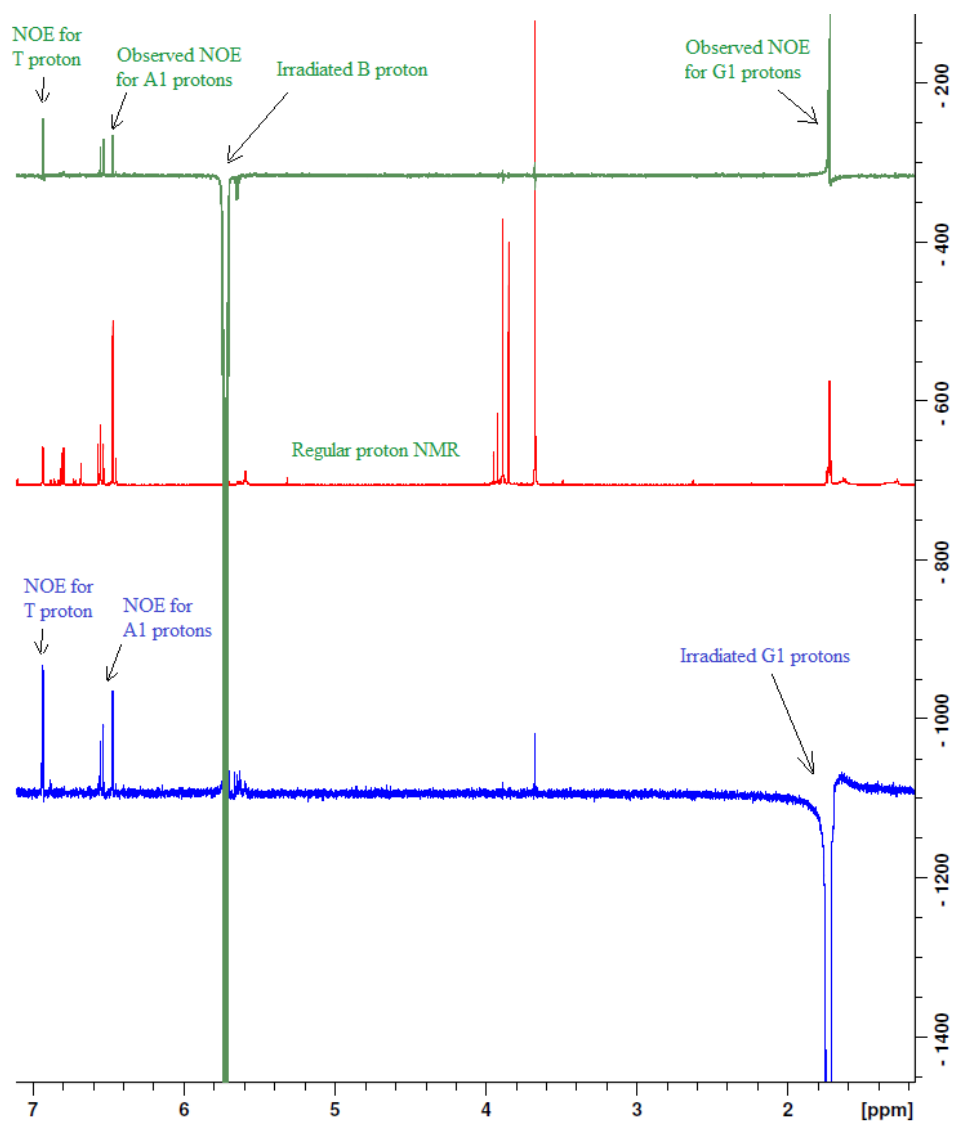

# NOE spectra of Compound 41

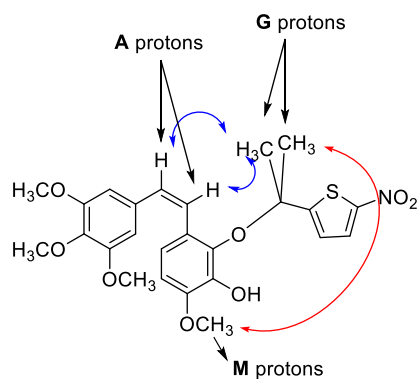

Blue arrow: NOE observed  
Red arrow: No NOE observed

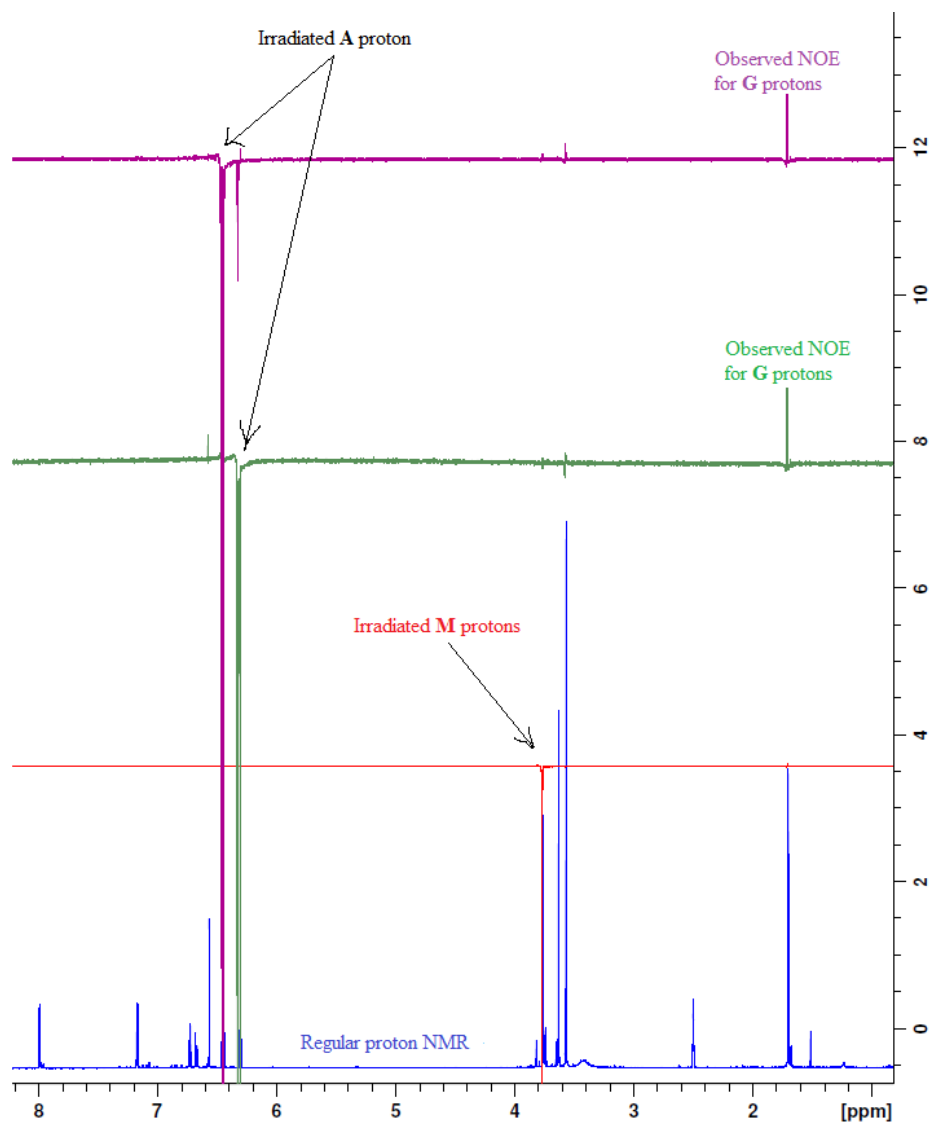

### Preliminary Pharmacokinetic (PK) Study

**LC-ESI MS Analysis:** Samples were analyzed on an Accela liquid chromatograph coupled to an LTQ Orbitrap Discovery mass spectrometer (Thermo Electron, Bremen, Germany) using positive electrospray ionization (+ESI). Samples were diluted tenfold into mobile phase and were injected (10  $\mu$ L) onto the LC system consisting of a 15 cm x 2.1 mm (5  $\mu$ m, 80 Å) Extended-C18 column (Agilent Technologies). A binary mobile phase gradient containing 0.1 % (v/v) formic acid (Fisher) in water (A) and acetonitrile (B) was applied as follows: 45 % A / 55 % B for 0.5 min, ramp to 2 % A / 98 % B over 3.50 min, held for 1.50 min at 2% A/ 98% B, return to 45 % A/ 55 % B in 0.1 min, and equilibrated for 1.40 min at 45 % A/ 55 % B. Additional chromatographic parameters were as follows: column temperature, 30 °C; flow rate, 350  $\mu$ L/min. Full-scan accurate mass spectra ( $m/z$  range: 50-700) of eluting compounds were obtained at high resolution (30,000 FWHM) on the Orbitrap mass analyzer using internal calibration (accuracy of measurements < 2 ppm) and processed using Xcalibur v.2.0.7 software. Electrospray source conditions were: sheath and auxiliary gas flow 50 and 5 arbitrary units (a.u.), respectively; heated capillary temperature 300 °C; electrospray voltage 4.5 kV; capillary voltage 43 V; tube lens voltage 205 V. The MS spectra were analyzed at exact masses for KGP18 [the internal standard (IS)] at  $m/z$  357.1684-357.1720 [M+H]; BAPC **45** at  $m/z$  508.1375-508.1425 [M+Na], and CA4 at  $m/z$  317.1368-317.1400 [M+H] for peaks at the respective elution times.

**Standard Curves:** Multiple replicates (n >3) of standard curves for CA4 and **45** were obtained from 8-point serial dilutions (spiked with IS KGP18) of stock solutions using the following concentrations (Table S5).

| <b>Table S5.</b> | <b>BAPC 45<br/>(KGP372)</b> | <b>CA4</b>         | <b>KGP18</b>       |
|------------------|-----------------------------|--------------------|--------------------|
| <u>Standard</u>  | <u>Conc.<br/>(ppb)</u>      | <u>Conc. (ppb)</u> | <u>Conc. (ppb)</u> |
| 8                | 1.14                        | 1.17               | 1.27               |
| 7                | 2.28                        | 2.34               | 2.54               |
| 6                | 5.68                        | 5.86               | 6.36               |
| 5                | 11.36                       | 11.73              | 12.73              |
| 4                | 14.20                       | 14.66              | 15.91              |
| 3                | 28.41                       | 29.32              | 31.82              |
| 2                | 56.82                       | 58.64              | 63.64              |
| 1                | 113.64                      | 117.27             | 127.27             |

After analysis by LC/MS, these standard curves were determined to be linear. The limit of quantification (LOQ) is represented by the lowest point [1.14 ppb KGP372 (BAPC 45); 1.17 ppb CA4; 1.27 ppb KGP18 (IS)] on each standard curve (Figure S4A, B).

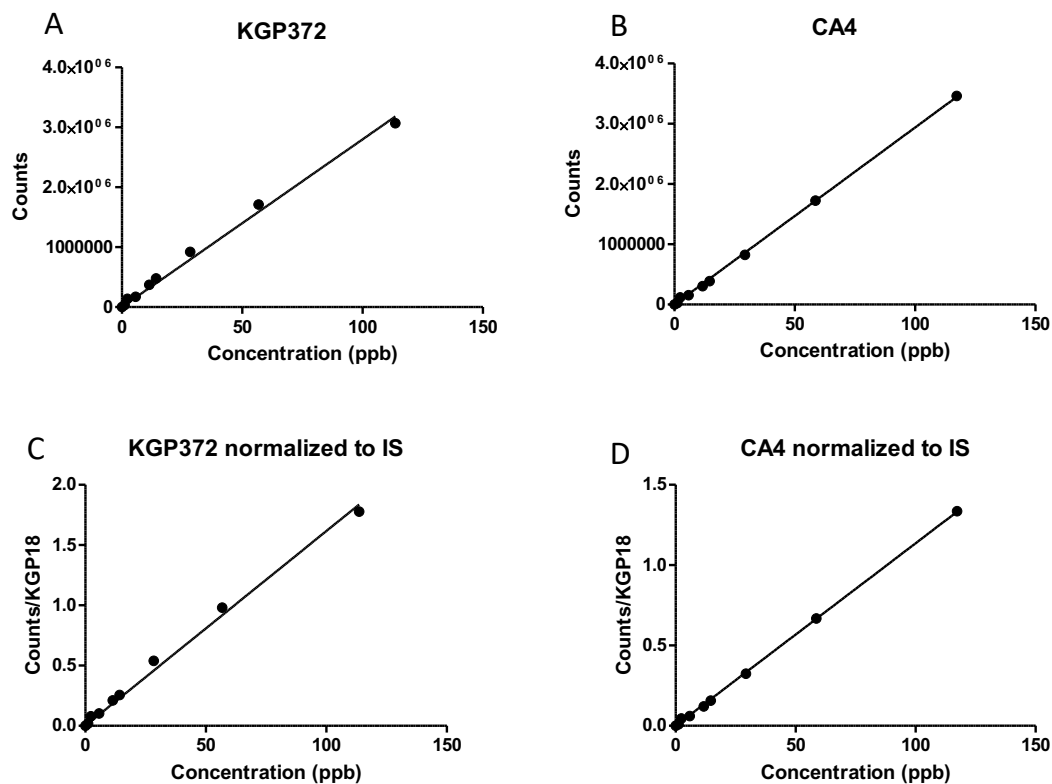

**Figure S4.** Representative standard curves for LC-MS. (A) BAPC 45 (KGP372); (B) CA4; (C) BAPC 45 (KGP372) standard curve normalized to internal standard KGP18 (IS); (D) CA4 standard curve normalized to internal standard KGP18 (IS).

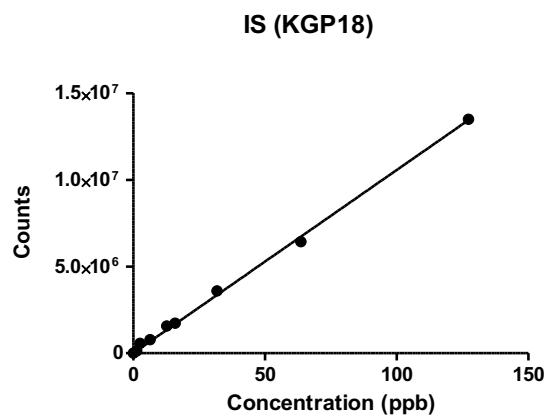

**Figure S5.** Standard curve for internal standard (IS) KGP18.

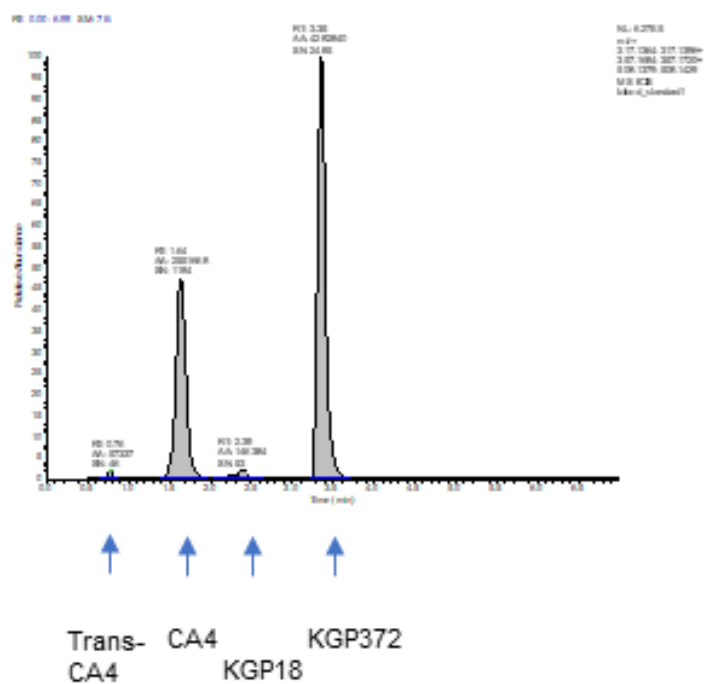

**Figure S6.** Elution of standards from LC, detection by exact molecular ion mass by MS. Retention times: *trans*-CA4 (0.76 min), CA4 (1.63 min), internal standard KGP18 (2.39 min), and KGP372 (BAPC **45**, 3.35 min).

**In Vivo Mouse Dosing:** A dose of 150 mg/kg BAPC **45** in DPS vehicle (120-135  $\mu$ L depending on mouse weight) was administered IP using a 29 G insulin syringe to three adult female BALB/C mice (24-27.2 g, UTSW breeding colony) and samples (50  $\mu$ L) were drawn at various times (30 min, 1 h, 2 h, 4 h, 8 h and 24 h) by retro-orbital bleed with heparin ( $\sim$ 5  $\mu$ L) and kept chilled at 4° C until frozen at -80° C.

**Sample Preparation:** Blood samples (50  $\mu$ L) were diluted with 50  $\mu$ L of water (Fisher) and proteins were precipitated by the addition of acetonitrile (Fisher). Samples were eluted from 0.3 mL supported liquid extraction Chem-Elut columns (Agilent) with acetonitrile, concentrated to dryness under nitrogen and reconstituted with 500  $\mu$ L acetonitrile. Samples were filtered through a 0.20  $\mu$ m syringe filter (Millex), and spiked with an internal standard (IS, KGP18).<sup>S26</sup> Extraction recoveries from spiked samples of blood from untreated mice were 94% for CA4, and 53% for BAPC **45**.

**Results:** All components separated upon analysis by LC/MS as described above for standards. None of these compounds (CA4, BAPC **45**, (KGP372), or KGP18 (IS) were detected in extracted, untreated mouse blood (data not shown). Quality control standards consisted of solutions spiked with known amounts of KGP18 internal standard and were run every 12 samples throughout the assay. BAPC **45** was measurable in all post injection samples, with increases at the 4 and 8 h time points. By the 24 h time point, blood concentrations of BAPC **45** had decreased (see Table S6 and Figures S7-S8). The release of CA4 was observed in blood levels at 4 h, which increased at 8 and 24 h (refer to Figure S7-S8 and Table S6). The mechanism for CA4 release was undetermined. In vitro (control) experiments with BAPC **45** in pH 7.4 phosphate buffer demonstrated minimal cleavage (0.69%) during a 48 h timeframe.

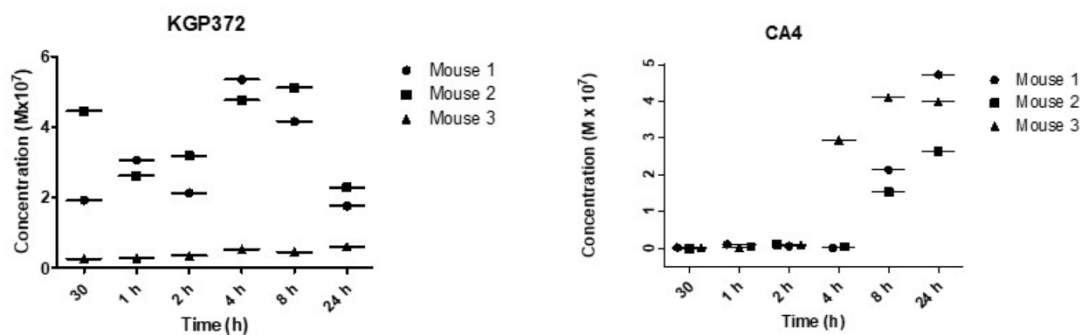

**Figure S7.** BAPC 45 (KGP372) detected in three individual mice dosed at 150 mg/kg of BAPC 45 (KGP372) in a vehicle of 10%DMSO / 55% sesame oil / 35% PEG400 at designated time points (30 min, 1 h, 2 h, 4 h, 8 h, and 24 h) post-treatment. (left) KGP372 (BAPC 45) concentrations; (right) CA4 concentrations.

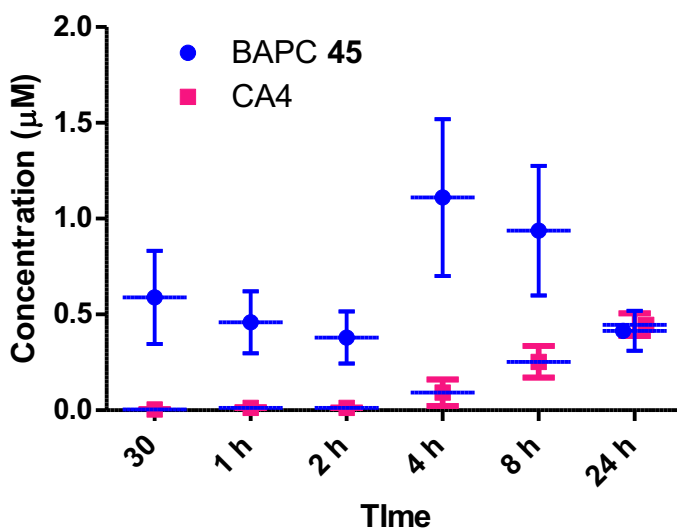

**Figure S8.** Combined data from Figure S7 and Table S6. BAPC 45 (KGP372) detected in three individual female mice dosed at 150 mg/kg of BAPC 45 (KGP372) in a vehicle of 10%DMSO / 55% sesame oil / 35% PEG400 at designated time points (30 min, 1 h, 2 h, 4 h, 8 h, and 24 h) post-treatment.

**Table S6.** Mean values ( $\mu\text{M} \pm \text{SEM}$ ) for BAPC **45** and CA4 concentrations in blood samples from mice treated with BAPC **45** (See Figures S7 and S8).

|        | BAPC <b>45</b>                  | CA4                             |
|--------|---------------------------------|---------------------------------|
| Time   | Avg $\pm$ SEM ( $\mu\text{M}$ ) | Avg $\pm$ SEM ( $\mu\text{M}$ ) |
| 30 min | $0.59 \pm 0.24$                 | $< \text{LOD}^a$                |
| 1 h    | $0.46 \pm 0.16$                 | $< \text{LOD}^a$                |
| 2 h    | $0.38 \pm 0.14$                 | detectable $< \text{LOQ}^b$     |
| 4 h    | $1.1 \pm 0.41$                  | $0.092 \pm 0.069$               |
| 8 h    | $0.94 \pm 0.34$                 | $0.25 \pm 0.083$                |
| 24 h   | $0.42 \pm 0.10$                 | $0.45 \pm 0.059$                |

<sup>a</sup> LOD = limit of detection

<sup>b</sup> LOQ = limit of quantification

## Hypoxia Cytotoxicity Ratio (HCR) Determined in A549 Lung Cancer Cell Line

Since the parent agents, CA4 and CA1, released from their corresponding BAPCs in hypoxic conditions are diffusable antimitotic agents, the hypoxia cytotoxicity assay was modified to eliminate drug removal after the 4 h hypoxic (or normoxic) treatment. With these conditions, the HCR for tirapazamine was much lower than reported in the literature (Table 3). For experiments in which the drug was washed out after the 4 h hypoxic (or normoxic) treatment, the HCR value was much higher and comparable to literature values (Table S7).

**Table S7.** In Vitro Potency and Hypoxia Cytotoxicity Ratio (HCR) of Tirapazamine and RB6145 in the A549 Human Cancer Cell Line

| Compound     | GI <sub>50</sub> [oxic] <sup>a</sup><br>(μM)±SEM | GI <sub>50</sub> [anoxic] <sup>a</sup><br>(μM)±SEM | HCR  |
|--------------|--------------------------------------------------|----------------------------------------------------|------|
| RB6145       | >130                                             | 36±6.4                                             | >3.6 |
| Tirapazamine | >203                                             | 3.3±1.3                                            | >62  |

<sup>a</sup> Average of n ≥ 3 independent determinations

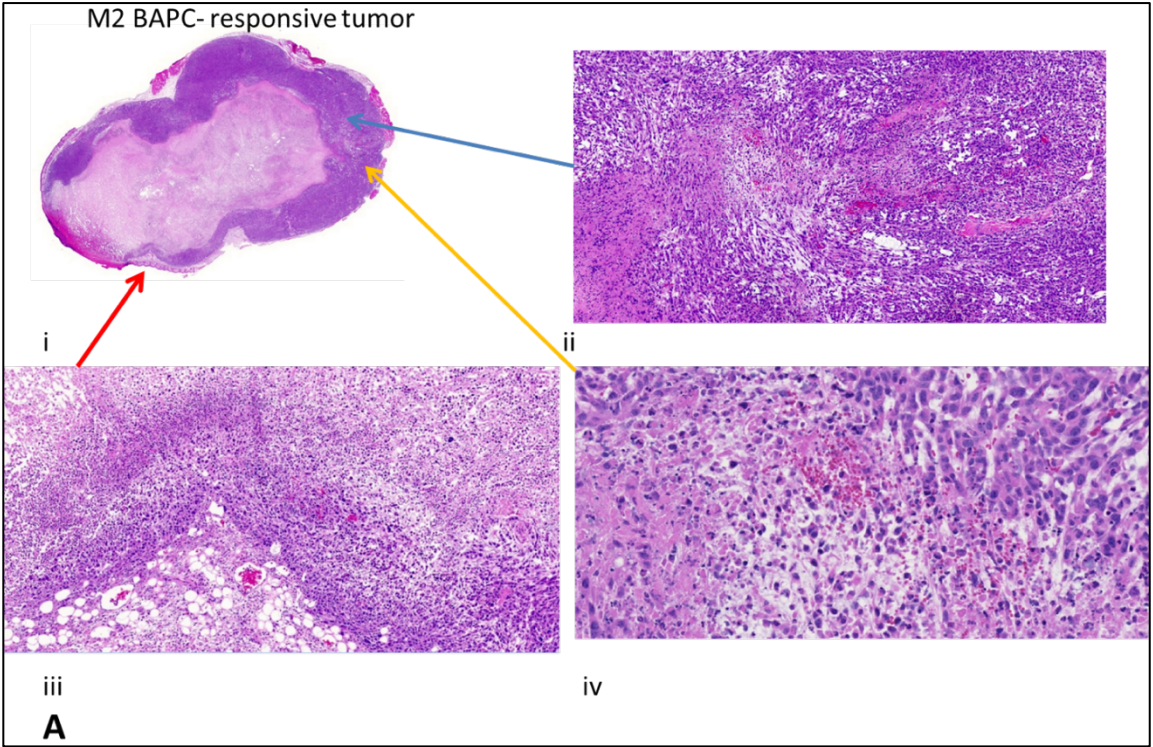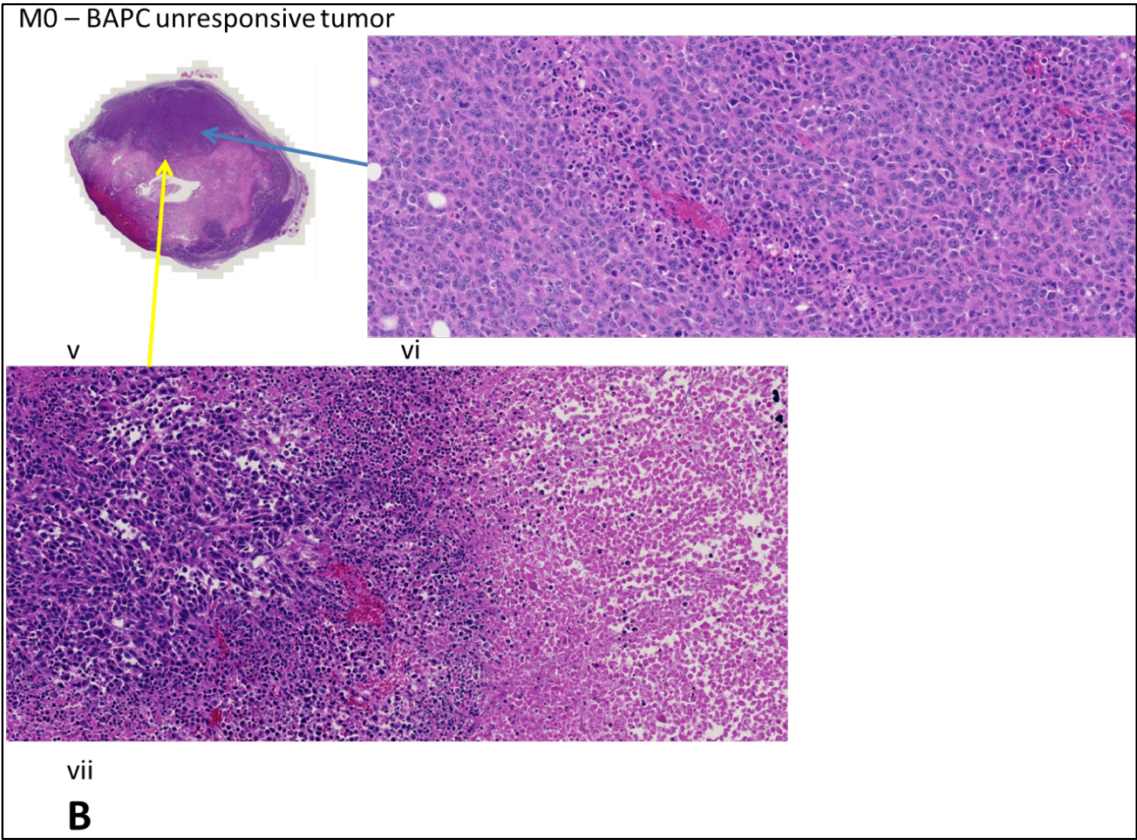

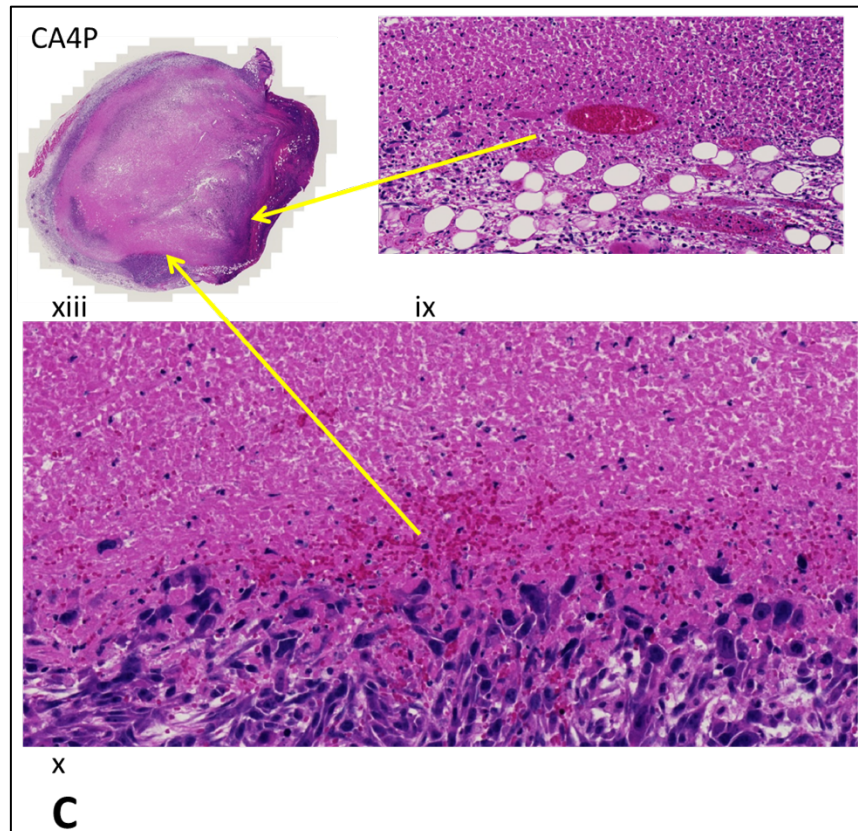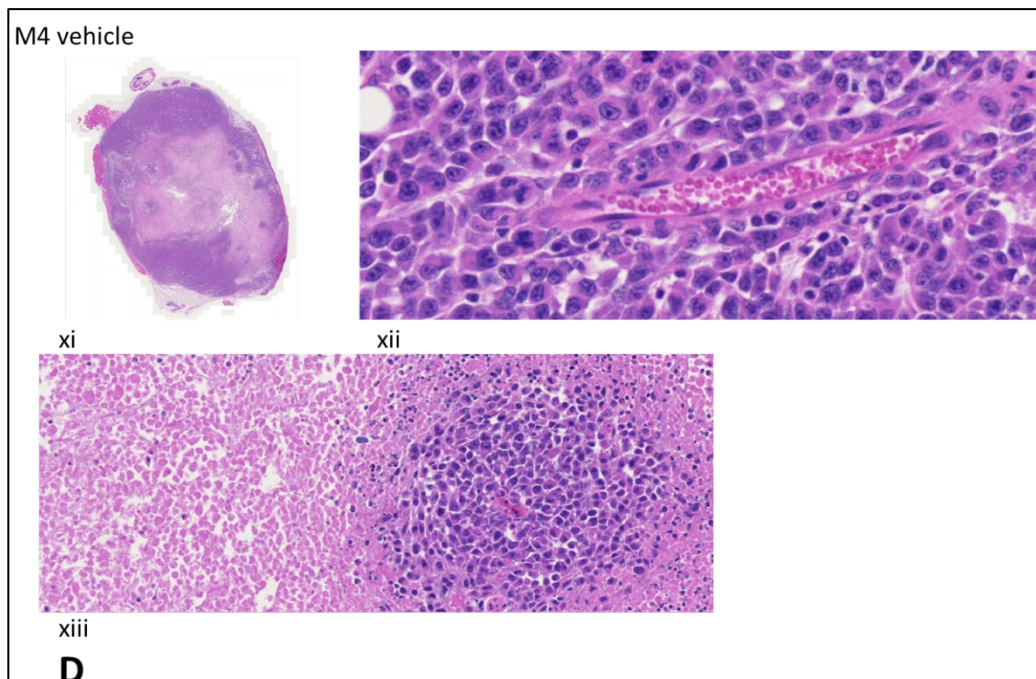

**Figure S9.** Histology revealing hemorrhage in 4T1 tumors following vascular damage. H&E stained sections of the four 4T1 tumors shown in Figure 5 (main manuscript) with magnified inserts to reveal vascular damage. All tumors showed extensive necrosis. A) M2 tumor responsive to BAPC 45. I) whole mount section; ii- iv) magnified insets

showing congested and hemorrhagic blood vessels. B) M0 tumor unresponsive to BAPC showing substantial necrosis but largely intact blood vessels. C) Tumor M1 following CA4P showing extensive hemorrhage particularly at the interface of viable and necrotic tissue. D) M4 receiving vehicle only showing intact blood vessels and classic viable tumor tissue chords, but no obvious hemorrhage despite extensive inherent necrosis.

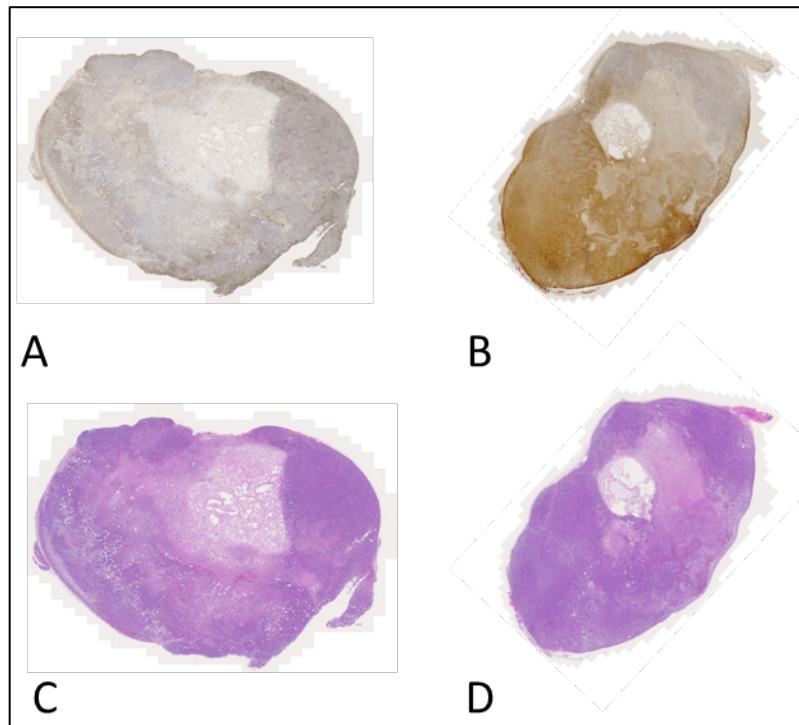

**Figure S10.** Hypoxia in control untreated orthotopic 4T1 tumors. Based on standard procedures,<sup>S27</sup> two 4T1 tumor-bearing mice received intravenous infusion of pimonidazole (60 mg/kg; Hypoxyprobe<sup>TM</sup>-1 Plus Kit; Hypoxyprobe Inc., Burlington, MA, USA). Sixty minutes later mice were anesthetized and the tumors excised and rapidly immersed in 4% paraformaldehyde with overnight fixation followed by a series of hydrations within 24 hr., before they were submitted for routine paraffin embedding, sectioning, and H&E staining (Histo Pathology Core, UT Southwestern). Pimonidazole was stained in 5  $\mu$ m paraffin sections using a Hypoxyprobe<sup>TM</sup>-1 Plus Kit according to the manufacturer's protocol for paraffin-embedded tissue. Whole mount images were obtained using a Zeiss Axio Scan.Z1 (Zeiss, Peabody, MA, USA). Both tumors were similar volume about 0.44 cm<sup>3</sup>. **A** and **B** show sections from respective tumors exhibiting very different levels of hypoxia. **B** and **D** show the corresponding H&E slides indicating some necrosis in each tumor.
